# Supplementary material for: Metal organic layers enabled cell surface engineering coupling biomembrane fusion for dynamic membrane proteome profiling
Source: Royal Society of Chemistry journal article supplement (doi:10.1039/d3sc03725h), 2023-01-01
Supplement: d3sc03725h1.xlsx [file d3sc03725h1.xlsx]

## Sheet: Identified proteins
Membrane proteome profiling of HeLa cells
Uniprot Accession	Entry Names	Protein names	Gene Names	Localization			Evidence for membrane	Organelle membrane localization							PSM
				Membrane	Extracellular	Others		Plasma membrane	Mitochondrial membrane	Nuclear membrane	Golgi membrane	Endoplasmic reticulum membrane	Vesicle associated membrane	Others
Q9NZM1	MYOF_HUMAN	Myoferlin (Fer-1-like protein 3)	MYOF FER1L3 KIAA1207	+			GOCC, TMHMM2.0	+		+			+		228
Q86UP2	KTN1_HUMAN	Kinectin (CG-1 antigen) (Kinesin receptor)	KTN1 CG1 KIAA0004	+			GOCC, TMHMM2.0	+				+			210
P27824	CALX_HUMAN	Calnexin (IP90) (Major histocompatibility complex class I antigen-binding protein p88) (p90)	CANX	+			GOCC, TMHMM2.0					+			186
P16615	AT2A2_HUMAN	Sarcoplasmic/endoplasmic reticulum calcium ATPase 2, SERCA2, SR Ca(2+)-ATPase 2, EC 7.2.2.10 (Calcium pump 2) (Calcium-transporting ATPase sarcoplasmic reticulum type, slow twitch skeletal muscle isoform) (Endoplasmic reticulum class 1/2 Ca(2+) ATPase)	ATP2A2 ATP2B	+			GOCC, TMHMM2.0	+				+			166
P08195	4F2_HUMAN	4F2 cell-surface antigen heavy chain, 4F2hc (4F2 heavy chain antigen) (Lymphocyte activation antigen 4F2 large subunit) (Solute carrier family 3 member 2) (CD antigen CD98)	SLC3A2 MDU1	+			GOCC, TMHMM2.0	+					+		165
P04843	RPN1_HUMAN	Dolichyl-diphosphooligosaccharide--protein glycosyltransferase subunit 1 (Dolichyl-diphosphooligosaccharide--protein glycosyltransferase 67 kDa subunit) (Ribophorin I, RPN-I) (Ribophorin-1)	RPN1	+			GOCC, TMHMM2.0					+			155
Q14643	ITPR1_HUMAN	Inositol 1,4,5-trisphosphate receptor type 1 (IP3 receptor isoform 1, IP3R 1, InsP3R1) (Type 1 inositol 1,4,5-trisphosphate receptor, Type 1 InsP3 receptor)	ITPR1 INSP3R1	+			GOCC, TMHMM2.0			+		+	+		154
P05556	ITB1_HUMAN	Integrin beta-1 (Fibronectin receptor subunit beta) (Glycoprotein IIa, GPIIA) (VLA-4 subunit beta) (CD antigen CD29)	ITGB1 FNRB MDF2 MSK12	+			GOCC, TMHMM2.0	+					+		144
Q13423	NNTM_HUMAN	NAD(P) transhydrogenase, mitochondrial, EC 7.1.1.1 (Nicotinamide nucleotide transhydrogenase) (Pyridine nucleotide transhydrogenase)	NNT	+			GOCC, TMHMM2.0		+						141
P43304	GPDM_HUMAN	Glycerol-3-phosphate dehydrogenase, mitochondrial, GPD-M, GPDH-M, EC 1.1.5.3 (mitohondrial glycerophosphate dehydrogenase gene, mGDH) (mtGPD)	GPD2	+			GOCC, TMHMM2.0		+						138
Q10471	GALT2_HUMAN	Polypeptide N-acetylgalactosaminyltransferase 2, EC 2.4.1.41 (Polypeptide GalNAc transferase 2, GalNAc-T2, pp-GaNTase 2) (Protein-UDP acetylgalactosaminyltransferase 2) (UDP-GalNAc:polypeptide N-acetylgalactosaminyltransferase 2) [Cleaved into: Polypeptide N-acetylgalactosaminyltransferase 2 soluble form ]	GALNT2	+			GOCC, TMHMM2.0				+	+			135
P11717	MPRI_HUMAN	Cation-independent mannose-6-phosphate receptor, CI Man-6-P receptor, CI-MPR, M6PR (300 kDa mannose 6-phosphate receptor, MPR 300) (Insulin-like growth factor 2 receptor) (Insulin-like growth factor II receptor, IGF-II receptor) (M6P/IGF2 receptor, M6P/IGF2R) (CD antigen CD222)	IGF2R MPRI	+			GOCC, TMHMM2.0	+		+	+		+		134
P05023	AT1A1_HUMAN	Sodium/potassium-transporting ATPase subunit alpha-1, Na(+)/K(+) ATPase alpha-1 subunit, EC 7.2.2.13 (Sodium pump subunit alpha-1)	ATP1A1	+			GOCC, TMHMM2.0	+							134
P02786	TFR1_HUMAN	Transferrin receptor protein 1, TR, TfR, TfR1, Trfr (T9) (p90) (CD antigen CD71) [Cleaved into: Transferrin receptor protein 1, serum form, sTfR ]	TFRC	+			GOCC, TMHMM2.0	+					+		120
Q07065	CKAP4_HUMAN	Cytoskeleton-associated protein 4 (63-kDa cytoskeleton-linking membrane protein, Climp-63, p63)	CKAP4	+			GOCC, TMHMM2.0	+				+			119
Q12797	ASPH_HUMAN	Aspartyl/asparaginyl beta-hydroxylase, EC 1.14.11.16 (Aspartate beta-hydroxylase, ASP beta-hydroxylase) (Peptide-aspartate beta-dioxygenase)	ASPH BAH	+			GOCC, TMHMM2.0	+				+			110
Q9Y4L1	HYOU1_HUMAN	Hypoxia up-regulated protein 1 (150 kDa oxygen-regulated protein, ORP-150) (170 kDa glucose-regulated protein, GRP-170)	HYOU1 GRP170 ORP150	+			GOCC, TMHMM2.0							+	109
P05141	ADT2_HUMAN	ADP/ATP translocase 2 (ADP,ATP carrier protein 2) (ADP,ATP carrier protein, fibroblast isoform) (Adenine nucleotide translocator 2, ANT 2) (Solute carrier family 25 member 5) [Cleaved into: ADP/ATP translocase 2, N-terminally processed ]	SLC25A5 AAC2 ANT2	+			GOCC, TMHMM2.0	+	+						109
Q14789	GOGB1_HUMAN	Golgin subfamily B member 1 (372 kDa Golgi complex-associated protein, GCP372) (Giantin) (Macrogolgin)	GOLGB1	+			GOCC, TMHMM2.0				+	+			107
P12236	ADT3_HUMAN	ADP/ATP translocase 3 (ADP,ATP carrier protein 3) (ADP,ATP carrier protein, isoform T2, ANT 2) (Adenine nucleotide translocator 3, ANT 3) (Solute carrier family 25 member 6) [Cleaved into: ADP/ATP translocase 3, N-terminally processed ]	SLC25A6 AAC3 ANT3 CDABP0051	+			GOCC, TMHMM2.0		+						107
P04844	RPN2_HUMAN	Dolichyl-diphosphooligosaccharide--protein glycosyltransferase subunit 2 (Dolichyl-diphosphooligosaccharide--protein glycosyltransferase 63 kDa subunit) (RIBIIR) (Ribophorin II, RPN-II) (Ribophorin-2)	RPN2	+			GOCC, TMHMM2.0					+			103
Q14573	ITPR3_HUMAN	Inositol 1,4,5-trisphosphate receptor type 3 (IP3 receptor isoform 3, IP3R 3, InsP3R3) (Type 3 inositol 1,4,5-trisphosphate receptor, Type 3 InsP3 receptor)	ITPR3	+			GOCC, TMHMM2.0	+		+		+	+		97
P12235	ADT1_HUMAN	ADP/ATP translocase 1 (ADP,ATP carrier protein 1) (ADP,ATP carrier protein, heart/skeletal muscle isoform T1) (Adenine nucleotide translocator 1, ANT 1) (Solute carrier family 25 member 4)	SLC25A4 AAC1 ANT1	+			GOCC, TMHMM2.0	+	+						95
Q9BSJ8	ESYT1_HUMAN	Extended synaptotagmin-1, E-Syt1 (Membrane-bound C2 domain-containing protein)	ESYT1 FAM62A KIAA0747 MBC2	+			GOCC, TMHMM2.0	+				+			92
Q00325	MPCP_HUMAN	Phosphate carrier protein, mitochondrial (Phosphate transport protein, PTP) (Solute carrier family 25 member 3)	SLC25A3 PHC OK/SW-cl.48	+			GOCC, TMHMM2.0	+	+						92
P49257	LMAN1_HUMAN	Protein ERGIC-53 (ER-Golgi intermediate compartment 53 kDa protein) (Gp58) (Intracellular mannose-specific lectin MR60) (Lectin mannose-binding 1)	LMAN1 ERGIC53 F5F8D	+			GOCC, TMHMM2.0				+	+	+		87
Q9P2E9	RRBP1_HUMAN	Ribosome-binding protein 1 (180 kDa ribosome receptor homolog, RRp) (ES/130-related protein) (Ribosome receptor protein)	RRBP1 KIAA1398	+			GOCC, TMHMM2.0					+			86
O95573	ACSL3_HUMAN	Fatty acid CoA ligase Acsl3 (Arachidonate--CoA ligase, EC 6.2.1.15) (Long-chain acyl-CoA synthetase 3, LACS 3) (Long-chain-fatty-acid--CoA ligase 3, EC 6.2.1.3) (Medium-chain acyl-CoA ligase Acsl3, EC 6.2.1.2)	ACSL3 ACS3 FACL3 LACS3	+			GOCC, TMHMM2.0	+	+			+	+		85
Q86SF2	GALT7_HUMAN	N-acetylgalactosaminyltransferase 7, EC 2.4.1.41 (Polypeptide GalNAc transferase 7, GalNAc-T7, pp-GaNTase 7) (Protein-UDP acetylgalactosaminyltransferase 7) (UDP-GalNAc:polypeptide N-acetylgalactosaminyltransferase 7)	GALNT7	+			GOCC, TMHMM2.0				+				78
O95202	LETM1_HUMAN	Mitochondrial proton/calcium exchanger protein (Leucine zipper-EF-hand-containing transmembrane protein 1)	LETM1	+			GOCC, TMHMM2.0		+						76
P06756	ITAV_HUMAN	Integrin alpha-V (Vitronectin receptor) (Vitronectin receptor subunit alpha) (CD antigen CD51) [Cleaved into: Integrin alpha-V heavy chain; Integrin alpha-V light chain ]	ITGAV MSK8 VNRA VTNR	+			GOCC, TMHMM2.0	+							74
Q9H9B4	SFXN1_HUMAN	Sideroflexin-1	SFXN1	+			GOCC, TMHMM2.0		+						74
O94826	TOM70_HUMAN	Mitochondrial import receptor subunit TOM70 (Mitochondrial precursor proteins import receptor) (Translocase of outer membrane 70 kDa subunit) (Translocase of outer mitochondrial membrane protein 70)	TOMM70 KIAA0719 TOM70 TOMM70A	+			GOCC, TMHMM2.0		+						73
P50416	CPT1A_HUMAN	Carnitine O-palmitoyltransferase 1, liver isoform, CPT1-L, EC 2.3.1.21 (Carnitine O-palmitoyltransferase I, liver isoform, CPT I, CPTI-L) (Carnitine palmitoyltransferase 1A)	CPT1A CPT1	+			GOCC, TMHMM2.0		+						72
P43121	MUC18_HUMAN	Cell surface glycoprotein MUC18 (Cell surface glycoprotein P1H12) (Melanoma cell adhesion molecule) (Melanoma-associated antigen A32) (Melanoma-associated antigen MUC18) (S-endo 1 endothelial-associated antigen) (CD antigen CD146)	MCAM MUC18	+			GOCC, TMHMM2.0	+							70
Q9P0L0	VAPA_HUMAN	Vesicle-associated membrane protein-associated protein A, VAMP-A, VAMP-associated protein A, VAP-A (33 kDa VAMP-associated protein, VAP-33)	VAPA VAP33	+			GOCC, TMHMM2.0	+		+	+	+			65
O75396	SC22B_HUMAN	Vesicle-trafficking protein SEC22b (ER-Golgi SNARE of 24 kDa, ERS-24, ERS24) (SEC22 vesicle-trafficking protein homolog B) (SEC22 vesicle-trafficking protein-like 1)	SEC22B SEC22L1	+			GOCC, TMHMM2.0				+	+	+		64
Q86UE4	LYRIC_HUMAN	Protein LYRIC (3D3/LYRIC) (Astrocyte elevated gene-1 protein, AEG-1) (Lysine-rich CEACAM1 co-isolated protein) (Metadherin) (Metastasis adhesion protein)	MTDH AEG1 LYRIC	+			GOCC, TMHMM2.0	+		+		+			61
P28288	ABCD3_HUMAN	ATP-binding cassette sub-family D member 3, EC 3.1.2.-, EC 7.6.2.- (70 kDa peroxisomal membrane protein, PMP70)	ABCD3 PMP70 PXMP1	+			GOCC, TMHMM2.0						+		61
Q6DD88	ATLA3_HUMAN	Atlastin-3, EC 3.6.5.-	ATL3	+			GOCC, TMHMM2.0					+			60
P39656	OST48_HUMAN	Dolichyl-diphosphooligosaccharide--protein glycosyltransferase 48 kDa subunit, DDOST 48 kDa subunit, Oligosaccharyl transferase 48 kDa subunit	DDOST KIAA0115 OST48 OK/SW-cl.45	+			GOCC, TMHMM2.0	+				+			59
Q9NZ01	TECR_HUMAN	Very-long-chain enoyl-CoA reductase, EC 1.3.1.93 (Synaptic glycoprotein SC2) (Trans-2,3-enoyl-CoA reductase, TER)	TECR GPSN2 SC2	+			GOCC, TMHMM2.0					+			59
P42167	LAP2B_HUMAN	Lamina-associated polypeptide 2, isoforms beta/gamma (Thymopoietin, isoforms beta/gamma, TP beta/gamma) (Thymopoietin-related peptide isoforms beta/gamma, TPRP isoforms beta/gamma) [Cleaved into: Thymopoietin, TP (Splenin); Thymopentin (TP5) ]	TMPO LAP2	+			GOCC, TMHMM2.0			+					58
Q96AG4	LRC59_HUMAN	Leucine-rich repeat-containing protein 59 (Ribosome-binding protein p34, p34) [Cleaved into: Leucine-rich repeat-containing protein 59, N-terminally processed ]	LRRC59 PRO1855	+			GOCC, TMHMM2.0			+		+			58
Q8TCJ2	STT3B_HUMAN	Dolichyl-diphosphooligosaccharide--protein glycosyltransferase subunit STT3B, Oligosaccharyl transferase subunit STT3B, STT3-B, EC 2.4.99.18 (Source of immunodominant MHC-associated peptides homolog)	STT3B SIMP	+			GOCC, TMHMM2.0					+			58
P46977	STT3A_HUMAN	Dolichyl-diphosphooligosaccharide--protein glycosyltransferase subunit STT3A, Oligosaccharyl transferase subunit STT3A, STT3-A, EC 2.4.99.18 (B5) (Integral membrane protein 1) (Transmembrane protein TMC)	STT3A ITM1 TMC	+			GOCC, TMHMM2.0					+			57
Q9Y4W6	AFG32_HUMAN	AFG3-like protein 2, EC 3.4.24.- (Paraplegin-like protein)	AFG3L2	+			GOCC, TMHMM2.0		+						56
Q8TEM1	PO210_HUMAN	Nuclear pore membrane glycoprotein 210, Nuclear pore protein gp210 (Nuclear envelope pore membrane protein POM 210, POM210) (Nucleoporin Nup210) (Pore membrane protein of 210 kDa)	NUP210 KIAA0906 PSEC0245	+			GOCC, TMHMM2.0			+		+			54
P48960	AGRE5_HUMAN	Adhesion G protein-coupled receptor E5 (Leukocyte antigen CD97) (CD antigen CD97) [Cleaved into: Adhesion G protein-coupled receptor E5 subunit alpha; Adhesion G protein-coupled receptor E5 subunit beta ]	ADGRE5 CD97	+			GOCC, TMHMM2.0	+							54
Q9BWM7	SFXN3_HUMAN	Sideroflexin-3	SFXN3	+			GOCC, TMHMM2.0		+						53
P35613	BASI_HUMAN	Basigin (5F7) (Collagenase stimulatory factor) (Extracellular matrix metalloproteinase inducer, EMMPRIN) (Hepatoma-associated antigen, HAb18G) (Leukocyte activation antigen M6) (OK blood group antigen) (Tumor cell-derived collagenase stimulatory factor, TCSF) (CD antigen CD147)	BSG UNQ6505/PRO21383	+			GOCC, TMHMM2.0	+			+	+			52
Q9BTV4	TMM43_HUMAN	Transmembrane protein 43 (Protein LUMA)	TMEM43 UNQ2564/PRO6244	+			GOCC, TMHMM2.0			+		+			51
P13073	COX41_HUMAN	Cytochrome c oxidase subunit 4 isoform 1, mitochondrial (Cytochrome c oxidase polypeptide IV) (Cytochrome c oxidase subunit IV isoform 1, COX IV-1)	COX4I1 COX4	+			GOCC, TMHMM2.0		+						51
Q9NS69	TOM22_HUMAN	Mitochondrial import receptor subunit TOM22 homolog, hTom22 (1C9-2) (Translocase of outer membrane 22 kDa subunit homolog)	TOMM22 TOM22	+			GOCC, TMHMM2.0		+						50
P50402	EMD_HUMAN	Emerin	EMD EDMD STA	+			GOCC, TMHMM2.0			+					49
P51572	BAP31_HUMAN	B-cell receptor-associated protein 31, BCR-associated protein 31, Bap31 (6C6-AG tumor-associated antigen) (Protein CDM) (p28)	BCAP31 BAP31 DXS1357E	+			GOCC, TMHMM2.0	+			+	+			49
Q14697	GANAB_HUMAN	Neutral alpha-glucosidase AB, EC 3.2.1.207 (Alpha-glucosidase 2) (Glucosidase II subunit alpha)	GANAB G2AN KIAA0088	+			GOCC, TMHMM2.0							+	48
Q9UGP8	SEC63_HUMAN	Translocation protein SEC63 homolog	SEC63 SEC63L	+			GOCC, TMHMM2.0							+	48
Q8TCT9	HM13_HUMAN	Minor histocompatibility antigen H13, EC 3.4.23.- (Intramembrane protease 1, IMP-1, IMPAS-1, hIMP1) (Presenilin-like protein 3) (Signal peptide peptidase)	HM13 H13 IMP1 PSL3 SPP MSTP086	+			GOCC, TMHMM2.0	+				+			48
Q9Y2H6	FND3A_HUMAN	Fibronectin type-III domain-containing protein 3A (Human gene expressed in odontoblasts)	FNDC3A FNDC3 HUGO KIAA0970	+			GOCC, TMHMM2.0				+		+		47
P32004	L1CAM_HUMAN	Neural cell adhesion molecule L1, N-CAM-L1, NCAM-L1 (CD antigen CD171)	L1CAM CAML1 MIC5	+			GOCC, TMHMM2.0	+							46
P16070	CD44_HUMAN	CD44 antigen (CDw44) (Epican) (Extracellular matrix receptor III, ECMR-III) (GP90 lymphocyte homing/adhesion receptor) (HUTCH-I) (Heparan sulfate proteoglycan) (Hermes antigen) (Hyaluronate receptor) (Phagocytic glycoprotein 1, PGP-1) (Phagocytic glycoprotein I, PGP-I) (CD antigen CD44)	CD44 LHR MDU2 MDU3 MIC4	+			GOCC, TMHMM2.0	+							45
P27105	STOM_HUMAN	Stomatin (Erythrocyte band 7 integral membrane protein) (Erythrocyte membrane protein band 7.2) (Protein 7.2b)	STOM BND7 EPB72	+			GOCC, TMHMM2.0	+							44
O75844	FACE1_HUMAN	CAAX prenyl protease 1 homolog, EC 3.4.24.84 (Farnesylated proteins-converting enzyme 1, FACE-1) (Prenyl protein-specific endoprotease 1) (Zinc metalloproteinase Ste24 homolog)	ZMPSTE24 FACE1 STE24	+			GOCC, TMHMM2.0			+		+			43
O15173	PGRC2_HUMAN	Membrane-associated progesterone receptor component 2 (Progesterone membrane-binding protein) (Steroid receptor protein DG6)	PGRMC2 DG6 PMBP	+			GOCC, TMHMM2.0			+					42
Q14126	DSG2_HUMAN	Desmoglein-2 (Cadherin family member 5) (HDGC)	DSG2 CDHF5	+			GOCC, TMHMM2.0	+							41
Q9NQC3	RTN4_HUMAN	Reticulon-4 (Foocen) (Neurite outgrowth inhibitor, Nogo protein) (Neuroendocrine-specific protein, NSP) (Neuroendocrine-specific protein C homolog) (RTN-x) (Reticulon-5)	RTN4 KIAA0886 NOGO My043 SP1507	+			GOCC, TMHMM2.0	+		+		+			41
O95292	VAPB_HUMAN	Vesicle-associated membrane protein-associated protein B/C, VAMP-B/VAMP-C, VAMP-associated protein B/C, VAP-B/VAP-C	VAPB UNQ484/PRO983	+			GOCC, TMHMM2.0	+				+			41
Q99805	TM9S2_HUMAN	Transmembrane 9 superfamily member 2 (p76)	TM9SF2	+			GOCC, TMHMM2.0	+					+		40
Q969X5	ERGI1_HUMAN	Endoplasmic reticulum-Golgi intermediate compartment protein 1 (ER-Golgi intermediate compartment 32 kDa protein, ERGIC-32)	ERGIC1 ERGIC32 KIAA1181 HT034	+			GOCC, TMHMM2.0				+	+			40
Q9Y5M8	SRPRB_HUMAN	Signal recognition particle receptor subunit beta, SR-beta (Protein APMCF1)	SRPRB PSEC0230	+			GOCC, TMHMM2.0					+			40
Q8IXI1	MIRO2_HUMAN	Mitochondrial Rho GTPase 2, MIRO-2, hMiro-2, EC 3.6.5.- (Ras homolog gene family member T2)	RHOT2 ARHT2 C16orf39	+			GOCC, TMHMM2.0		+						38
Q9HDC9	APMAP_HUMAN	Adipocyte plasma membrane-associated protein (Protein BSCv)	APMAP C20orf3 UNQ1869/PRO4305	+			GOCC, TMHMM2.0	+							38
Q9HD45	TM9S3_HUMAN	Transmembrane 9 superfamily member 3 (EP70-P-iso) (SM-11044-binding protein)	TM9SF3 SMBP UNQ245/PRO282	+			GOCC, TMHMM2.0							+	37
Q10472	GALT1_HUMAN	Polypeptide N-acetylgalactosaminyltransferase 1, EC 2.4.1.41 (Polypeptide GalNAc transferase 1, GalNAc-T1, pp-GaNTase 1) (Protein-UDP acetylgalactosaminyltransferase 1) (UDP-GalNAc:polypeptide N-acetylgalactosaminyltransferase 1) [Cleaved into: Polypeptide N-acetylgalactosaminyltransferase 1 soluble form ]	GALNT1	+			GOCC, TMHMM2.0				+	+			37
Q01650	LAT1_HUMAN	Large neutral amino acids transporter small subunit 1 (4F2 light chain, 4F2 LC, 4F2LC) (CD98 light chain) (Integral membrane protein E16, E16) (L-type amino acid transporter 1, hLAT1) (Solute carrier family 7 member 5) (y+ system cationic amino acid transporter)	SLC7A5 CD98LC LAT1 MPE16	+			GOCC, TMHMM2.0	+					+		37
Q96TC7	RMD3_HUMAN	Regulator of microtubule dynamics protein 3, RMD-3, hRMD-3 (Cerebral protein 10) (Protein FAM82A2) (Protein FAM82C) (Protein tyrosine phosphatase-interacting protein 51) (TCPTP-interacting protein 51)	RMDN3 FAM82A2 FAM82C PTPIP51 hucep-10 UNQ3122/PRO10274	+			GOCC, TMHMM2.0		+						37
Q9BVK6	TMED9_HUMAN	Transmembrane emp24 domain-containing protein 9 (GMP25) (Glycoprotein 25L2) (p24 family protein alpha-2, p24alpha2) (p25)	TMED9 GP25L2	+			GOCC, TMHMM2.0				+	+			37
O14880	MGST3_HUMAN	Microsomal glutathione S-transferase 3, Microsomal GST-3 (Glutathione peroxidase MGST3, EC 1.11.1.-) (LTC4 synthase MGST3, EC 4.4.1.20) (Microsomal glutathione S-transferase III, Microsomal GST-III)	MGST3	+			GOCC, TMHMM2.0			+		+			36
P33527	MRP1_HUMAN	Multidrug resistance-associated protein 1, EC 7.6.2.2 (ATP-binding cassette sub-family C member 1) (Glutathione-S-conjugate-translocating ATPase ABCC1, EC 7.6.2.3) (Leukotriene C(4) transporter, LTC4 transporter)	ABCC1 MRP MRP1	+			GOCC, TMHMM2.0	+							35
P51648	AL3A2_HUMAN	Aldehyde dehydrogenase family 3 member A2, EC 1.2.1.3, EC 1.2.1.94 (Aldehyde dehydrogenase 10) (Fatty aldehyde dehydrogenase) (Microsomal aldehyde dehydrogenase)	ALDH3A2 ALDH10 FALDH	+			GOCC, TMHMM2.0					+	+		35
Q96KA5	CLP1L_HUMAN	Lipid scramblase CLPTM1L (Cisplatin resistance-related protein 9, CRR9p) (Cleft lip and palate transmembrane protein 1-like protein, CLPTM1-like protein)	CLPTM1L CRR9	+			GOCC, TMHMM2.0					+			35
Q9ULG6	CCPG1_HUMAN	Cell cycle progression protein 1 (Cell cycle progression restoration protein 8)	CCPG1 CCP8 CPR8 KIAA1254	+			GOCC, TMHMM2.0							+	35
P21964	COMT_HUMAN	Catechol O-methyltransferase, EC 2.1.1.6	COMT	+			GOCC, TMHMM2.0	+							34
P08648	ITA5_HUMAN	Integrin alpha-5 (CD49 antigen-like family member E) (Fibronectin receptor subunit alpha) (Integrin alpha-F) (VLA-5) (CD antigen CD49e) [Cleaved into: Integrin alpha-5 heavy chain; Integrin alpha-5 light chain ]	ITGA5 FNRA	+			GOCC, TMHMM2.0	+							34
P61619	S61A1_HUMAN	Protein transport protein Sec61 subunit alpha isoform 1, Sec61 alpha-1	SEC61A1 SEC61A	+			GOCC, TMHMM2.0					+			34
P24821	TENA_HUMAN	Tenascin, TN (Cytotactin) (GMEM) (GP 150-225) (Glioma-associated-extracellular matrix antigen) (Hexabrachion) (JI) (Myotendinous antigen) (Neuronectin) (Tenascin-C, TN-C)	TNC HXB	+			GOCC, TMHMM2.0							+	33
Q12907	LMAN2_HUMAN	Vesicular integral-membrane protein VIP36 (Glycoprotein GP36b) (Lectin mannose-binding 2) (Vesicular integral-membrane protein 36, VIP36)	LMAN2 C5orf8	+			GOCC, TMHMM2.0	+			+	+			33
Q07954	LRP1_HUMAN	Prolow-density lipoprotein receptor-related protein 1, LRP-1 (Alpha-2-macroglobulin receptor, A2MR) (Apolipoprotein E receptor, APOER) (CD antigen CD91) [Cleaved into: Low-density lipoprotein receptor-related protein 1 85 kDa subunit, LRP-85; Low-density lipoprotein receptor-related protein 1 515 kDa subunit, LRP-515; Low-density lipoprotein receptor-related protein 1 intracellular domain, LRPICD…	LRP1 A2MR APR	+			GOCC, TMHMM2.0	+					+		33
Q96ER9	MITOK_HUMAN	Mitochondrial potassium channel, MITOK (Coiled-coil domain-containing protein 51)	CCDC51 MITOK	+			GOCC, TMHMM2.0		+						33
P49755	TMEDA_HUMAN	Transmembrane emp24 domain-containing protein 10, Protein TMED10 (21 kDa transmembrane-trafficking protein) (S31I125) (S31III125) (Tmp-21-I) (Transmembrane protein Tmp21) (p23) (p24 family protein delta-1, p24delta1) (p24delta)	TMED10 TMP21	+			GOCC, TMHMM2.0	+			+	+	+		33
Q9P035	HACD3_HUMAN	Very-long-chain (3R)-3-hydroxyacyl-CoA dehydratase 3, EC 4.2.1.134 (3-hydroxyacyl-CoA dehydratase 3, HACD3) (Butyrate-induced protein 1, B-ind1, hB-ind1) (Protein-tyrosine phosphatase-like A domain-containing protein 1)	HACD3 BIND1 PTPLAD1	+			GOCC, TMHMM2.0			+		+			33
Q969V3	NCLN_HUMAN	Nicalin (Nicastrin-like protein)	NCLN	+			GOCC, TMHMM2.0					+			32
O15260	SURF4_HUMAN	Surfeit locus protein 4	SURF4 SURF-4	+			GOCC, TMHMM2.0	+		+	+	+			32
Q9NTJ5	SAC1_HUMAN	Phosphatidylinositol-3-phosphatase SAC1, EC 3.1.3.64 (Phosphatidylinositol-4-phosphate phosphatase) (Suppressor of actin mutations 1-like protein)	SACM1L KIAA0851 SAC1	+			GOCC, TMHMM2.0	+			+	+			32
Q9UH62	ARMX3_HUMAN	Armadillo repeat-containing X-linked protein 3 (ARM protein lost in epithelial cancers on chromosome X 3, Protein ALEX3)	ARMCX3 ALEX3 BM-017 UNQ2517/PRO6007	+			GOCC, TMHMM2.0		+						31
P00403	COX2_HUMAN	Cytochrome c oxidase subunit 2, EC 7.1.1.9 (Cytochrome c oxidase polypeptide II)	MT-CO2 COII COX2 COXII MTCO2	+			GOCC, TMHMM2.0		+						31
O96005	CLPT1_HUMAN	Putative lipid scramblase CLPTM1 (Cleft lip and palate transmembrane protein 1)	CLPTM1	+			GOCC, TMHMM2.0	+							31
O60427	FADS1_HUMAN	Acyl-CoA (8-3)-desaturase, EC 1.14.19.44 (Delta(5) fatty acid desaturase, D5D, Delta(5) desaturase, Delta-5 desaturase) (Fatty acid desaturase 1)	FADS1 FADSD5	+			GOCC, TMHMM2.0					+			31
Q15005	SPCS2_HUMAN	Signal peptidase complex subunit 2 (Microsomal signal peptidase 25 kDa subunit, SPase 25 kDa subunit)	SPCS2 KIAA0102 SPC25	+			GOCC, TMHMM2.0					+			31
Q14571	ITPR2_HUMAN	Inositol 1,4,5-trisphosphate receptor type 2 (IP3 receptor isoform 2, IP3R 2, InsP3R2) (Type 2 inositol 1,4,5-trisphosphate receptor, Type 2 InsP3 receptor)	ITPR2	+			GOCC, TMHMM2.0	+				+	+		31
Q9Y3B3	TMED7_HUMAN	Transmembrane emp24 domain-containing protein 7 (p24 family protein gamma-3, p24gamma3) (p27)	TMED7 CGI-109	+			GOCC, TMHMM2.0				+	+			30
Q53GQ0	DHB12_HUMAN	Very-long-chain 3-oxoacyl-CoA reductase, EC 1.1.1.330 (17-beta-hydroxysteroid dehydrogenase 12, 17-beta-HSD 12) (3-ketoacyl-CoA reductase, KAR) (Estradiol 17-beta-dehydrogenase 12, EC 1.1.1.62) (Short chain dehydrogenase/reductase family 12C member 1)	HSD17B12 SDR12C1	+			GOCC, TMHMM2.0					+			30
P05026	AT1B1_HUMAN	Sodium/potassium-transporting ATPase subunit beta-1 (Sodium/potassium-dependent ATPase subunit beta-1)	ATP1B1 ATP1B	+			GOCC, TMHMM2.0	+							30
P15291	B4GT1_HUMAN	Beta-1,4-galactosyltransferase 1, Beta-1,4-GalTase 1, Beta4Gal-T1, b4Gal-T1, EC 2.4.1.- (Beta-N-acetylglucosaminyl-glycolipid beta-1,4-galactosyltransferase) (Beta-N-acetylglucosaminylglycopeptide beta-1,4-galactosyltransferase, EC 2.4.1.38) (Lactose synthase A protein, EC 2.4.1.22) (N-acetyllactosamine synthase, EC 2.4.1.90) (Nal synthase) (Neolactotriaosylceramide beta-1,4-galactosyltransferase…	B4GALT1 GGTB2	+			GOCC, TMHMM2.0	+			+				29
Q96HD1	CREL1_HUMAN	Protein disulfide isomerase CRELD1, EC 5.3.4.1 (Cysteine-rich with EGF-like domain protein 1)	CRELD1 CIRRIN UNQ188/PRO214	+			GOCC, TMHMM2.0							+	29
P16435	NCPR_HUMAN	NADPH--cytochrome P450 reductase, CPR, P450R, EC 1.6.2.4	POR CYPOR	+			GOCC, TMHMM2.0					+			29
A0FGR8	ESYT2_HUMAN	Extended synaptotagmin-2, E-Syt2 (Chr2Syt)	ESYT2 FAM62B KIAA1228	+			GOCC, TMHMM2.0	+				+			29
Q13505	MTX1_HUMAN	Metaxin-1 (Mitochondrial outer membrane import complex protein 1)	MTX1 MTX MTXN	+			GOCC, TMHMM2.0		+						29
P19022	CADH2_HUMAN	Cadherin-2 (CDw325) (Neural cadherin, N-cadherin) (CD antigen CD325)	CDH2 CDHN NCAD	+			GOCC, TMHMM2.0	+							28
Q9Y4P3	TBL2_HUMAN	Transducin beta-like protein 2 (WS beta-transducin repeats protein, WS-betaTRP) (Williams-Beuren syndrome chromosomal region 13 protein)	TBL2 WBSCR13 UNQ563/PRO1125	+			GOCC, TMHMM2.0					+			28
Q15758	AAAT_HUMAN	Neutral amino acid transporter B(0), ATB(0) (Baboon M7 virus receptor) (RD114/simian type D retrovirus receptor) (Sodium-dependent neutral amino acid transporter type 2) (Solute carrier family 1 member 5)	SLC1A5 ASCT2 M7V1 RDR RDRC	+			GOCC, TMHMM2.0	+							28
Q16850	CP51A_HUMAN	Lanosterol 14-alpha demethylase, LDM, EC 1.14.14.154 (CYPLI) (Cytochrome P450 51A1) (Cytochrome P450-14DM, Cytochrome P45014DM) (Cytochrome P450LI) (Sterol 14-alpha demethylase)	CYP51A1 CYP51	+			GOCC, TMHMM2.0					+			28
Q9UBM7	DHCR7_HUMAN	7-dehydrocholesterol reductase, 7-DHC reductase, EC 1.3.1.21 (Delta7-sterol reductase) (Sterol Delta(7)-reductase) (Sterol reductase SR-2)	DHCR7 D7SR	+			GOCC, TMHMM2.0			+		+			28
Q15738	NSDHL_HUMAN	Sterol-4-alpha-carboxylate 3-dehydrogenase, decarboxylating, EC 1.1.1.170 (Protein H105e3)	NSDHL H105E3	+			GOCC, TMHMM2.0					+			28
Q9UH99	SUN2_HUMAN	SUN domain-containing protein 2 (Protein unc-84 homolog B) (Rab5-interacting protein, Rab5IP) (Sad1/unc-84 protein-like 2)	SUN2 FRIGG KIAA0668 RAB5IP UNC84B	+			GOCC, TMHMM2.0			+			+		27
Q92544	TM9S4_HUMAN	Transmembrane 9 superfamily member 4 (Tumor cannibalism associated protein 1)	TM9SF4 KIAA0255 TUCAP1	+			GOCC, TMHMM2.0							+	27
O14975	S27A2_HUMAN	Long-chain fatty acid transport protein 2 (Arachidonate--CoA ligase, EC 6.2.1.15) (Fatty acid transport protein 2, FATP-2) (Fatty-acid-coenzyme A ligase, very long-chain 1) (Long-chain-fatty-acid--CoA ligase, EC 6.2.1.3) (Phytanate--CoA ligase, EC 6.2.1.24) (Solute carrier family 27 member 2) (THCA-CoA ligase, EC 6.2.1.7) (Very long-chain acyl-CoA synthetase, VLACS, VLCS, EC 6.2.1.-) (Very long-c…	SLC27A2 ACSVL1 FACVL1 FATP2 VLACS	+			GOCC, TMHMM2.0	+				+	+		27
Q15392	DHC24_HUMAN	Delta(24)-sterol reductase, EC 1.3.1.72 (24-dehydrocholesterol reductase) (3-beta-hydroxysterol Delta-24-reductase) (Diminuto/dwarf1 homolog) (Seladin-1)	DHCR24 KIAA0018	+			GOCC, TMHMM2.0				+	+			27
Q3ZCQ8	TIM50_HUMAN	Mitochondrial import inner membrane translocase subunit TIM50	TIMM50 TIM50 PRO1512	+			GOCC, TMHMM2.0		+						27
P10620	MGST1_HUMAN	Microsomal glutathione S-transferase 1, Microsomal GST-1, EC 2.5.1.18 (Microsomal GST-I)	MGST1 GST12 MGST	+			GOCC, TMHMM2.0	+	+			+	+		27
O75027	ABCB7_HUMAN	Iron-sulfur clusters transporter ABCB7, mitochondrial (ATP-binding cassette sub-family B member 7, mitochondrial) (ATP-binding cassette transporter 7, ABC transporter 7 protein)	ABCB7 ABC7	+			GOCC, TMHMM2.0		+						26
O94901	SUN1_HUMAN	SUN domain-containing protein 1 (Protein unc-84 homolog A) (Sad1/unc-84 protein-like 1)	SUN1 KIAA0810 UNC84A	+			GOCC, TMHMM2.0			+					26
O00592	PODXL_HUMAN	Podocalyxin (GCTM-2 antigen) (Gp200) (Podocalyxin-like protein 1, PC, PCLP-1)	PODXL PCLP PCLP1	+			GOCC, TMHMM2.0	+							26
P43307	SSRA_HUMAN	Translocon-associated protein subunit alpha, TRAP-alpha (Signal sequence receptor subunit alpha, SSR-alpha)	SSR1 TRAPA PSEC0262	+			GOCC, TMHMM2.0					+			26
P11279	LAMP1_HUMAN	Lysosome-associated membrane glycoprotein 1, LAMP-1, Lysosome-associated membrane protein 1 (CD107 antigen-like family member A) (CD antigen CD107a)	LAMP1	+			GOCC, TMHMM2.0	+					+		26
Q9H0U3	MAGT1_HUMAN	Magnesium transporter protein 1, MagT1 (Dolichyl-diphosphooligosaccharide--protein glycosyltransferase subunit MAGT1, Oligosaccharyl transferase subunit MAGT1) (Implantation-associated protein, IAP)	MAGT1 IAG2 PSEC0084 UNQ628/PRO1244	+			GOCC, TMHMM2.0	+				+			26
P15328	FOLR1_HUMAN	Folate receptor alpha, FR-alpha (Adult folate-binding protein, FBP) (Folate receptor 1) (Folate receptor, adult) (KB cells FBP) (Ovarian tumor-associated antigen MOv18)	FOLR1 FOLR	+			GOCC, TMHMM2.0	+			+	+	+		25
O75477	ERLN1_HUMAN	Erlin-1 (Endoplasmic reticulum lipid raft-associated protein 1) (Protein KE04) (Stomatin-prohibitin-flotillin-HflC/K domain-containing protein 1, SPFH domain-containing protein 1)	ERLIN1 C10orf69 KE04 KEO4 SPFH1	+			GOCC, TMHMM2.0					+			25
Q9NZJ7	MTCH1_HUMAN	Mitochondrial carrier homolog 1 (Presenilin-associated protein)	MTCH1 PSAP CGI-64 UNQ1871/PRO4314	+			GOCC, TMHMM2.0		+						25
Q14739	LBR_HUMAN	Delta(14)-sterol reductase LBR, Delta-14-SR, EC 1.3.1.70 (3-beta-hydroxysterol Delta (14)-reductase) (C-14 sterol reductase, C14SR) (Integral nuclear envelope inner membrane protein) (LMN2R) (Lamin-B receptor) (Sterol C14-reductase)	LBR	+			GOCC, TMHMM2.0			+		+			25
Q15582	BGH3_HUMAN	Transforming growth factor-beta-induced protein ig-h3, Beta ig-h3 (Kerato-epithelin) (RGD-containing collagen-associated protein, RGD-CAP)	TGFBI BIGH3	+			GOCC, TMHMM2.0	+							25
Q14165	MLEC_HUMAN	Malectin	MLEC KIAA0152	+			GOCC, TMHMM2.0	+				+			25
Q8NF37	PCAT1_HUMAN	Lysophosphatidylcholine acyltransferase 1, LPC acyltransferase 1, LPCAT-1, LysoPC acyltransferase 1, EC 2.3.1.23 (1-acylglycerol-3-phosphate O-acyltransferase, EC 2.3.1.51) (1-acylglycerophosphocholine O-acyltransferase) (1-alkenylglycerophosphocholine O-acyltransferase, EC 2.3.1.25) (1-alkylglycerophosphocholine O-acetyltransferase, EC 2.3.1.67) (Acetyl-CoA:lyso-platelet-activating factor acetyl…	LPCAT1 AYTL2 PFAAP3	+			GOCC, TMHMM2.0	+			+	+			24
O15269	SPTC1_HUMAN	Serine palmitoyltransferase 1, EC 2.3.1.50 (Long chain base biosynthesis protein 1, LCB 1) (Serine-palmitoyl-CoA transferase 1, SPT 1, SPT1)	SPTLC1 LCB1	+			GOCC, TMHMM2.0					+			24
Q15363	TMED2_HUMAN	Transmembrane emp24 domain-containing protein 2 (Membrane protein p24A) (p24) (p24 family protein beta-1, p24beta1)	TMED2 RNP24	+			GOCC, TMHMM2.0				+	+	+		24
P57088	TMM33_HUMAN	Transmembrane protein 33 (Protein DB83) (SHINC-3)	TMEM33 DB83	+			GOCC, TMHMM2.0			+		+			24
Q9H3N1	TMX1_HUMAN	Thioredoxin-related transmembrane protein 1 (Thioredoxin domain-containing protein 1) (Transmembrane Trx-related protein)	TMX1 TMX TXNDC TXNDC1 PSEC0085 UNQ235/PRO268	+			GOCC, TMHMM2.0					+			24
Q96JJ7	TMX3_HUMAN	Protein disulfide-isomerase TMX3, EC 5.3.4.1 (Thioredoxin domain-containing protein 10) (Thioredoxin-related transmembrane protein 3)	TMX3 KIAA1830 TXNDC10	+			GOCC, TMHMM2.0	+				+			23
Q9Y282	ERGI3_HUMAN	Endoplasmic reticulum-Golgi intermediate compartment protein 3 (Serologically defined breast cancer antigen NY-BR-84)	ERGIC3 C20orf47 ERV46 SDBCAG84 CGI-54 PRO0989	+			GOCC, TMHMM2.0				+	+			23
O95864	FADS2_HUMAN	Acyl-CoA 6-desaturase, EC 1.14.19.3 (Delta(6) fatty acid desaturase, D6D, Delta(6) desaturase, Delta-6 desaturase) (Fatty acid desaturase 2)	FADS2	+			GOCC, TMHMM2.0	+				+			23
Q7Z7H5	TMED4_HUMAN	Transmembrane emp24 domain-containing protein 4 (Endoplasmic reticulum stress-response protein 25, ERS25) (GMP25iso) (Putative NF-kappa-B-activating protein 156) (p24 family protein alpha-3, p24alpha3)	TMED4 ERS25	+			GOCC, TMHMM2.0				+	+			23
P53985	MOT1_HUMAN	Monocarboxylate transporter 1, MCT 1 (Solute carrier family 16 member 1)	SLC16A1 MCT1	+			GOCC, TMHMM2.0	+							23
P00167	CYB5_HUMAN	Cytochrome b5 (Microsomal cytochrome b5 type A, MCB5)	CYB5A CYB5	+			GOCC, TMHMM2.0		+			+			23
P11166	GTR1_HUMAN	Solute carrier family 2, facilitated glucose transporter member 1 (Glucose transporter type 1, erythrocyte/brain, GLUT-1) (HepG2 glucose transporter)	SLC2A1 GLUT1	+			GOCC, TMHMM2.0	+			+				23
Q9HC07	TM165_HUMAN	Transmembrane protein 165 (Transmembrane protein PT27) (Transmembrane protein TPARL)	TMEM165 TPARL	+			GOCC, TMHMM2.0				+		+		23
P57105	SYJ2B_HUMAN	Synaptojanin-2-binding protein (Mitochondrial outer membrane protein 25)	SYNJ2BP OMP25	+			GOCC, TMHMM2.0	+	+						23
O00264	PGRC1_HUMAN	Membrane-associated progesterone receptor component 1, mPR (Dap1) (IZA)	PGRMC1 HPR6.6 PGRMC	+			GOCC, TMHMM2.0	+	+			+			23
Q92626	PXDN_HUMAN	Peroxidasin homolog, EC 1.11.2.- (Melanoma-associated antigen MG50) (Peroxidasin 1, hsPxd01) (Vascular peroxidase 1) (p53-responsive gene 2 protein) [Cleaved into: PXDN active fragment ]	PXDN KIAA0230 MG50 PRG2 PXD01 VPO VPO1	+			GOCC, TMHMM2.0	+							22
P00533	EGFR_HUMAN	Epidermal growth factor receptor, EC 2.7.10.1 (Proto-oncogene c-ErbB-1) (Receptor tyrosine-protein kinase erbB-1)	EGFR ERBB ERBB1 HER1	+			GOCC, TMHMM2.0	+		+	+	+	+		22
Q9NP58	ABCB6_HUMAN	ATP-binding cassette sub-family B member 6 (ABC-type heme transporter ABCB6, EC 7.6.2.5) (Mitochondrial ABC transporter 3, Mt-ABC transporter 3) (P-glycoprotein-related protein) (Ubiquitously-expressed mammalian ABC half transporter)	ABCB6 MTABC3 PRP UMAT	+			GOCC, TMHMM2.0	+	+		+	+	+		22
P23229	ITA6_HUMAN	Integrin alpha-6 (CD49 antigen-like family member F) (VLA-6) (CD antigen CD49f) [Cleaved into: Integrin alpha-6 heavy chain; Integrin alpha-6 light chain; Processed integrin alpha-6, Alpha6p ]	ITGA6	+			GOCC, TMHMM2.0	+							22
O43169	CYB5B_HUMAN	Cytochrome b5 type B (Cytochrome b5 outer mitochondrial membrane isoform)	CYB5B CYB5M OMB5	+			GOCC, TMHMM2.0		+						22
P09601	HMOX1_HUMAN	Heme oxygenase 1, HO-1, EC 1.14.14.18 [Cleaved into: Heme oxygenase 1 soluble form ]	HMOX1 HO HO1	+			GOCC, TMHMM2.0		+			+			22
Q9UBS4	DJB11_HUMAN	DnaJ homolog subfamily B member 11 (APOBEC1-binding protein 2, ABBP-2) (DnaJ protein homolog 9) (ER-associated DNAJ) (ER-associated Hsp40 co-chaperone) (Endoplasmic reticulum DNA J domain-containing protein 3, ER-resident protein ERdj3, ERdj3, ERj3p) (HEDJ) (Human DnaJ protein 9, hDj-9) (PWP1-interacting protein 4)	DNAJB11 EDJ ERJ3 HDJ9 PSEC0121 UNQ537/PRO1080	+			GOCC, TMHMM2.0							+	22
Q02127	PYRD_HUMAN	Dihydroorotate dehydrogenase (quinone), mitochondrial, DHOdehase, EC 1.3.5.2 (Dihydroorotate oxidase)	DHODH	+			GOCC, TMHMM2.0		+						22
P41221	WNT5A_HUMAN	Protein Wnt-5a	WNT5A	+			GOCC, TMHMM2.0	+					+		22
O95197	RTN3_HUMAN	Reticulon-3 (Homolog of ASY protein, HAP) (Neuroendocrine-specific protein-like 2, NSP-like protein 2) (Neuroendocrine-specific protein-like II, NSP-like protein II, NSPLII)	RTN3 ASYIP NSPL2	+			GOCC, TMHMM2.0	+			+	+			22
Q96N66	MBOA7_HUMAN	Lysophospholipid acyltransferase 7, LPLAT 7, EC 2.3.1.- (1-acylglycerophosphatidylinositol O-acyltransferase) (Bladder and breast carcinoma-overexpressed gene 1 protein) (Leukocyte receptor cluster member 4) (Lysophosphatidylinositol acyltransferase, LPIAT, Lyso-PI acyltransferase) (Membrane-bound O-acyltransferase domain-containing protein 7, O-acyltransferase domain-containing protein 7, h-mboa…	MBOAT7 BB1 LENG4 OACT7	+			GOCC, TMHMM2.0					+			22
Q15125	EBP_HUMAN	3-beta-hydroxysteroid-Delta(8),Delta(7)-isomerase, EC 5.3.3.5 (Cholestenol Delta-isomerase) (Delta(8)-Delta(7) sterol isomerase, D8-D7 sterol isomerase) (Emopamil-binding protein)	EBP	+			GOCC, TMHMM2.0			+		+			22
P03928	ATP8_HUMAN	ATP synthase protein 8 (A6L) (F-ATPase subunit 8)	MT-ATP8 ATP8 ATPASE8 MTATP8	+			GOCC, TMHMM2.0		+						22
Q13443	ADAM9_HUMAN	Disintegrin and metalloproteinase domain-containing protein 9, ADAM 9, EC 3.4.24.- (Cellular disintegrin-related protein) (Meltrin-gamma) (Metalloprotease/disintegrin/cysteine-rich protein 9) (Myeloma cell metalloproteinase)	ADAM9 KIAA0021 MCMP MDC9 MLTNG	+			GOCC, TMHMM2.0	+							21
P42892	ECE1_HUMAN	Endothelin-converting enzyme 1, ECE-1, EC 3.4.24.71	ECE1	+			GOCC, TMHMM2.0	+					+		21
Q93050	VPP1_HUMAN	V-type proton ATPase 116 kDa subunit a 1, V-ATPase 116 kDa subunit a 1 (Clathrin-coated vesicle/synaptic vesicle proton pump 116 kDa subunit) (Vacuolar adenosine triphosphatase subunit Ac116) (Vacuolar proton pump subunit 1) (Vacuolar proton translocating ATPase 116 kDa subunit a isoform 1)	ATP6V0A1 ATP6N1 ATP6N1A VPP1	+			GOCC, TMHMM2.0	+					+		21
Q03135	CAV1_HUMAN	Caveolin-1	CAV1 CAV	+			GOCC, TMHMM2.0	+			+	+	+		21
Q9NZ45	CISD1_HUMAN	CDGSH iron-sulfur domain-containing protein 1 (MitoNEET)	CISD1 C10orf70 ZCD1 MDS029	+			GOCC, TMHMM2.0		+						21
Q96PC5	MIA2_HUMAN	Melanoma inhibitory activity protein 2, MIA protein 2 (CTAGE family member 5 ER export factor) (Cutaneous T-cell lymphoma-associated antigen 5) (Meningioma-expressed antigen 6/11)	MIA2 CTAGE5 MEA11 MEA6 MGEA11 MGEA6	+			GOCC, TMHMM2.0					+			21
P09669	COX6C_HUMAN	Cytochrome c oxidase subunit 6C (Cytochrome c oxidase polypeptide VIc)	COX6C	+			GOCC, TMHMM2.0		+						21
O15427	MOT4_HUMAN	Monocarboxylate transporter 4, MCT 4 (Solute carrier family 16 member 3)	SLC16A3 MCT3 MCT4	+			GOCC, TMHMM2.0	+		+					21
Q9BU23	LMF2_HUMAN	Lipase maturation factor 2 (Transmembrane protein 112B) (Transmembrane protein 153)	LMF2 TMEM112B TMEM153	+			GOCC, TMHMM2.0					+			20
Q9UBV2	SE1L1_HUMAN	Protein sel-1 homolog 1 (Suppressor of lin-12-like protein 1, Sel-1L)	SEL1L TSA305 UNQ128/PRO1063	+			GOCC, TMHMM2.0					+			20
Q9UIQ6	LCAP_HUMAN	Leucyl-cystinyl aminopeptidase, Cystinyl aminopeptidase, EC 3.4.11.3 (Insulin-regulated membrane aminopeptidase) (Insulin-responsive aminopeptidase, IRAP) (Oxytocinase, OTase) (Placental leucine aminopeptidase, P-LAP) [Cleaved into: Leucyl-cystinyl aminopeptidase, pregnancy serum form ]	LNPEP OTASE	+			GOCC, TMHMM2.0	+					+		20
Q9BT22	ALG1_HUMAN	Chitobiosyldiphosphodolichol beta-mannosyltransferase, EC 2.4.1.142 (Asparagine-linked glycosylation protein 1 homolog) (Beta-1,4-mannosyltransferase) (GDP-Man:GlcNAc2-PP-dolichol mannosyltransferase) (GDP-mannose-dolichol diphosphochitobiose mannosyltransferase) (Mannosyltransferase-1, MT-1, hMat-1)	ALG1 HMAT1 HMT1 PSEC0061 UNQ861/PRO1870	+			GOCC, TMHMM2.0					+			20
Q9Y6M5	ZNT1_HUMAN	Zinc transporter 1, ZnT-1 (Solute carrier family 30 member 1)	SLC30A1 ZNT1	+			GOCC, TMHMM2.0	+		+					20
P15529	MCP_HUMAN	Membrane cofactor protein (TLX) (Trophoblast leukocyte common antigen) (CD antigen CD46)	CD46 MCP MIC10	+			GOCC, TMHMM2.0	+							20
Q00765	REEP5_HUMAN	Receptor expression-enhancing protein 5 (Polyposis locus protein 1) (Protein TB2)	REEP5 C5orf18 DP1 TB2	+			GOCC, TMHMM2.0							+	20
P20020	AT2B1_HUMAN	Plasma membrane calcium-transporting ATPase 1, EC 7.2.2.10 (Plasma membrane calcium ATPase isoform 1, PMCA1) (Plasma membrane calcium pump isoform 1)	ATP2B1 PMCA1	+			GOCC, TMHMM2.0	+					+		19
O00461	GOLI4_HUMAN	Golgi integral membrane protein 4 (Golgi integral membrane protein, cis, GIMPc) (Golgi phosphoprotein 4) (Golgi-localized phosphoprotein of 130 kDa, Golgi phosphoprotein of 130 kDa)	GOLIM4 GIMPC GOLPH4 GPP130	+			GOCC, TMHMM2.0				+		+		19
P18031	PTN1_HUMAN	Tyrosine-protein phosphatase non-receptor type 1, EC 3.1.3.48 (Protein-tyrosine phosphatase 1B, PTP-1B)	PTPN1 PTP1B	+			GOCC, TMHMM2.0					+			19
Q9Y639	NPTN_HUMAN	Neuroplastin (Stromal cell-derived receptor 1, SDR-1)	NPTN SDFR1 SDR1	+			GOCC, TMHMM2.0	+							19
Q9BTX1	NDC1_HUMAN	Nucleoporin NDC1, hNDC1 (Transmembrane protein 48)	NDC1 TMEM48	+			GOCC, TMHMM2.0	+		+					19
Q9H936	GHC1_HUMAN	Mitochondrial glutamate carrier 1, GC-1 (Glutamate/H(+) symporter 1) (Solute carrier family 25 member 22)	SLC25A22 GC1	+			GOCC, TMHMM2.0		+						19
Q9GZY8	MFF_HUMAN	Mitochondrial fission factor	MFF C2orf33 AD030 AD033 GL004	+			GOCC, TMHMM2.0		+						19
P10321	HLAC_HUMAN	HLA class I histocompatibility antigen, C alpha chain, HLA-C (HLA-Cw) (Human leukocyte antigen C)	HLA-C HLAC	+			GOCC, TMHMM2.0	+			+	+	+		19
P23284	PPIB_HUMAN	Peptidyl-prolyl cis-trans isomerase B, PPIase B, EC 5.2.1.8 (CYP-S1) (Cyclophilin B) (Rotamase B) (S-cyclophilin, SCYLP)	PPIB CYPB	+			GOCC, TMHMM2.0							+	19
Q15070	OXA1L_HUMAN	Mitochondrial inner membrane protein OXA1L (Hsa) (OXA1Hs) (Oxidase assembly 1-like protein, OXA1-like protein)	OXA1L	+			GOCC, TMHMM2.0		+						19
Q9P2B2	FPRP_HUMAN	Prostaglandin F2 receptor negative regulator (CD9 partner 1, CD9P-1) (Glu-Trp-Ile EWI motif-containing protein F, EWI-F) (Prostaglandin F2-alpha receptor regulatory protein) (Prostaglandin F2-alpha receptor-associated protein) (CD antigen CD315)	PTGFRN CD9P1 EWIF FPRP KIAA1436	+			GOCC, TMHMM2.0	+				+			18
Q9UKM7	MA1B1_HUMAN	Endoplasmic reticulum mannosyl-oligosaccharide 1,2-alpha-mannosidase, EC 3.2.1.113 (ER alpha-1,2-mannosidase) (ER mannosidase 1, ERMan1) (Man9GlcNAc2-specific-processing alpha-mannosidase) (Mannosidase alpha class 1B member 1)	MAN1B1 UNQ747/PRO1477	+			GOCC, TMHMM2.0					+			18
Q8NBX0	SCPDL_HUMAN	Saccharopine dehydrogenase-like oxidoreductase, EC 1.-.-.-	SCCPDH CGI-49	+			GOCC, TMHMM2.0							+	18
P34741	SDC2_HUMAN	Syndecan-2, SYND2 (Fibroglycan) (Heparan sulfate proteoglycan core protein, HSPG) (CD antigen CD362)	SDC2 HSPG1	+			GOCC, TMHMM2.0	+							18
O43772	MCAT_HUMAN	Mitochondrial carnitine/acylcarnitine carrier protein (Carnitine/acylcarnitine translocase, CAC, CACT) (Solute carrier family 25 member 20)	SLC25A20 CAC CACT	+			GOCC, TMHMM2.0		+						18
O75915	PRAF3_HUMAN	PRA1 family protein 3 (ADP-ribosylation factor-like protein 6-interacting protein 5, ARL-6-interacting protein 5, Aip-5) (Cytoskeleton-related vitamin A-responsive protein) (Dermal papilla-derived protein 11) (GTRAP3-18) (Glutamate transporter EAAC1-interacting protein) (JM5) (Prenylated Rab acceptor protein 2) (Protein JWa) (Putative MAPK-activating protein PM27)	ARL6IP5 DERP11 JWA PRA2 PRAF3 HSPC127	+			GOCC, TMHMM2.0	+				+			18
P04439	HLAA_HUMAN	HLA class I histocompatibility antigen, A alpha chain (Human leukocyte antigen A, HLA-A)	HLA-A HLAA	+			GOCC, TMHMM2.0	+			+	+	+		18
Q9NX14	NDUBB_HUMAN	NADH dehydrogenase [ubiquinone] 1 beta subcomplex subunit 11, mitochondrial (Complex I-ESSS, CI-ESSS) (NADH-ubiquinone oxidoreductase ESSS subunit) (Neuronal protein 17.3, Np17.3, p17.3)	NDUFB11 UNQ111/PRO1064	+			GOCC, TMHMM2.0		+						18
Q8TB61	S35B2_HUMAN	Adenosine 3'-phospho 5'-phosphosulfate transporter 1 (PAPS transporter 1) (Putative MAPK-activating protein PM15) (Putative NF-kappa-B-activating protein 48) (Solute carrier family 35 member B2)	SLC35B2 PAPST1 PSEC0149	+			GOCC, TMHMM2.0				+	+			18
Q9BVV7	TIM21_HUMAN	Mitochondrial import inner membrane translocase subunit Tim21 (TIM21-like protein, mitochondrial)	TIMM21 C18orf55 TIM21 HSPC154	+			GOCC, TMHMM2.0		+						18
Q9UHQ9	NB5R1_HUMAN	NADH-cytochrome b5 reductase 1, b5R.1, EC 1.6.2.2 (Humb5R2) (NAD(P)H:quinone oxidoreductase type 3 polypeptide A2)	CYB5R1 NQO3A2 UNQ3049/PRO9865	+			GOCC, TMHMM2.0	+				+			18
O00767	SCD_HUMAN	Stearoyl-CoA desaturase, hSCD1, EC 1.14.19.1 (Acyl-CoA desaturase) (Delta(9)-desaturase, Delta-9 desaturase) (Fatty acid desaturase)	SCD FADS5 SCD1 SCDOS	+			GOCC, TMHMM2.0					+			18
Q13724	MOGS_HUMAN	Mannosyl-oligosaccharide glucosidase, EC 3.2.1.106 (Processing A-glucosidase I)	MOGS GCS1	+			GOCC, TMHMM2.0					+			17
P20645	MPRD_HUMAN	Cation-dependent mannose-6-phosphate receptor, CD Man-6-P receptor, CD-MPR (46 kDa mannose 6-phosphate receptor, MPR 46)	M6PR MPR46 MPRD	+			GOCC, TMHMM2.0	+					+		17
P01130	LDLR_HUMAN	Low-density lipoprotein receptor, LDL receptor	LDLR	+			GOCC, TMHMM2.0	+					+		17
Q15836	VAMP3_HUMAN	Vesicle-associated membrane protein 3, VAMP-3 (Cellubrevin, CEB) (Synaptobrevin-3)	VAMP3 SYB3	+			GOCC, TMHMM2.0	+					+		17
O95140	MFN2_HUMAN	Mitofusin-2, EC 3.6.5.- (Transmembrane GTPase MFN2)	MFN2 CPRP1 KIAA0214	+			GOCC, TMHMM2.0		+						17
P01889	HLAB_HUMAN	HLA class I histocompatibility antigen, B alpha chain (Human leukocyte antigen B, HLA-B)	HLA-B HLAB	+			GOCC, TMHMM2.0	+			+	+	+		17
Q14318	FKBP8_HUMAN	Peptidyl-prolyl cis-trans isomerase FKBP8, PPIase FKBP8, EC 5.2.1.8 (38 kDa FK506-binding protein, 38 kDa FKBP, FKBP-38, hFKBP38) (FK506-binding protein 8, FKBP-8) (FKBPR38) (Rotamase)	FKBP8 FKBP38	+			GOCC, TMHMM2.0		+			+			17
Q8NE86	MCU_HUMAN	Calcium uniporter protein, mitochondrial, HsMCU (Coiled-coil domain-containing protein 109A)	MCU C10orf42 CCDC109A	+			GOCC, TMHMM2.0		+						17
Q96G23	CERS2_HUMAN	Ceramide synthase 2, CerS2 (LAG1 longevity assurance homolog 2) (SP260) (Sphingosine N-acyltransferase CERS2, EC 2.3.1.24) (Tumor metastasis-suppressor gene 1 protein) (Very-long-chain ceramide synthase CERS2, EC 2.3.1.297)	CERS2 LASS2 TMSG1	+			GOCC, TMHMM2.0					+			17
Q6P4E1	GOLM2_HUMAN	Protein GOLM2 (Cancer susceptibility candidate gene 4 protein, CASC4) (Golgi membrane protein 2)	GOLM2 CASC4 UNQ2573/PRO6308	+			GOCC, TMHMM2.0							+	17
Q8IXB1	DJC10_HUMAN	DnaJ homolog subfamily C member 10, EC 1.8.4.- (Endoplasmic reticulum DNA J domain-containing protein 5, ER-resident protein ERdj5, ERdj5) (Macrothioredoxin, MTHr)	DNAJC10 ERDJ5 UNQ495/PRO1012	+			GOCC, TMHMM2.0							+	17
P67812	SC11A_HUMAN	Signal peptidase complex catalytic subunit SEC11A, EC 3.4.21.89 (Endopeptidase SP18) (Microsomal signal peptidase 18 kDa subunit, SPase 18 kDa subunit) (SEC11 homolog A) (SEC11-like protein 1) (SPC18)	SEC11A SEC11L1 SPC18 SPCS4A	+			GOCC, TMHMM2.0					+			17
P08962	CD63_HUMAN	CD63 antigen (Granulophysin) (Lysosomal-associated membrane protein 3, LAMP-3) (Lysosome integral membrane protein 1, Limp1) (Melanoma-associated antigen ME491) (OMA81H) (Ocular melanoma-associated antigen) (Tetraspanin-30, Tspan-30) (CD antigen CD63)	CD63 MLA1 TSPAN30	+			GOCC, TMHMM2.0	+					+		17
P61803	DAD1_HUMAN	Dolichyl-diphosphooligosaccharide--protein glycosyltransferase subunit DAD1, Oligosaccharyl transferase subunit DAD1 (Defender against cell death 1, DAD-1)	DAD1	+			GOCC, TMHMM2.0					+			17
P60468	SC61B_HUMAN	Protein transport protein Sec61 subunit beta	SEC61B	+			GOCC, TMHMM2.0					+			17
Q3ZAQ7	VMA21_HUMAN	Vacuolar ATPase assembly integral membrane protein VMA21 (Myopathy with excessive autophagy protein)	VMA21 MEAX XMEA	+			GOCC, TMHMM2.0				+	+	+		17
Q9Y3E5	PTH2_HUMAN	Peptidyl-tRNA hydrolase 2, mitochondrial, PTH 2, EC 3.1.1.29 (Bcl-2 inhibitor of transcription 1)	PTRH2 BIT1 PTH2 CGI-147	+			GOCC, TMHMM2.0							+	16
Q53EP0	FND3B_HUMAN	Fibronectin type III domain-containing protein 3B (Factor for adipocyte differentiation 104) (HCV NS5A-binding protein 37)	FNDC3B FAD104 NS5ABP37 UNQ2421/PRO4979/PRO34274	+			GOCC, TMHMM2.0							+	16
O14672	ADA10_HUMAN	Disintegrin and metalloproteinase domain-containing protein 10, ADAM 10, EC 3.4.24.81 (CDw156) (Kuzbanian protein homolog) (Mammalian disintegrin-metalloprotease) (CD antigen CD156c)	ADAM10 KUZ MADM	+			GOCC, TMHMM2.0	+			+				16
Q7Z434	MAVS_HUMAN	Mitochondrial antiviral-signaling protein, MAVS (CARD adapter inducing interferon beta, Cardif) (Interferon beta promoter stimulator protein 1, IPS-1) (Putative NF-kappa-B-activating protein 031N) (Virus-induced-signaling adapter, VISA)	MAVS IPS1 KIAA1271 VISA	+			GOCC, TMHMM2.0		+				+		16
Q9Y679	AUP1_HUMAN	Lipid droplet-regulating VLDL assembly factor AUP1 (Ancient ubiquitous protein 1)	AUP1	+			GOCC, TMHMM2.0					+			16
Q9ULF5	S39AA_HUMAN	Zinc transporter ZIP10 (Solute carrier family 39 member 10) (Zrt- and Irt-like protein 10, ZIP-10)	SLC39A10 KIAA1265 ZIP10	+			GOCC, TMHMM2.0	+							16
P26006	ITA3_HUMAN	Integrin alpha-3 (CD49 antigen-like family member C) (FRP-2) (Galactoprotein B3, GAPB3) (VLA-3 subunit alpha) (CD antigen CD49c) [Cleaved into: Integrin alpha-3 heavy chain; Integrin alpha-3 light chain ]	ITGA3 MSK18	+			GOCC, TMHMM2.0	+							16
P00395	COX1_HUMAN	Cytochrome c oxidase subunit 1, EC 7.1.1.9 (Cytochrome c oxidase polypeptide I)	MT-CO1 COI COXI MTCO1	+			GOCC, TMHMM2.0		+						15
Q03518	TAP1_HUMAN	Antigen peptide transporter 1, APT1, EC 7.4.2.- (ATP-binding cassette sub-family B member 2) (Peptide supply factor 1) (Peptide transporter PSF1, PSF-1) (Peptide transporter TAP1) (Peptide transporter involved in antigen processing 1) (Really interesting new gene 4 protein, RING4)	TAP1 ABCB2 PSF1 RING4 Y3	+			GOCC, TMHMM2.0				+	+	+		15
Q14432	PDE3A_HUMAN	cGMP-inhibited 3',5'-cyclic phosphodiesterase 3A, EC 3.1.4.17 (Cyclic GMP-inhibited phosphodiesterase A, CGI-PDE A) (cGMP-inhibited cAMP phosphodiesterase, cGI-PDE)	PDE3A	+			GOCC, TMHMM2.0							+	15
P78310	CXAR_HUMAN	Coxsackievirus and adenovirus receptor, CAR, hCAR (CVB3-binding protein) (Coxsackievirus B-adenovirus receptor) (HCVADR)	CXADR CAR	+			GOCC, TMHMM2.0	+							15
Q9P0S9	TM14C_HUMAN	Transmembrane protein 14C	TMEM14C C6orf53 HSPC194	+			GOCC, TMHMM2.0		+						15
Q13740	CD166_HUMAN	CD166 antigen (Activated leukocyte cell adhesion molecule) (CD antigen CD166)	ALCAM MEMD	+			GOCC, TMHMM2.0	+							15
P24390	ERD21_HUMAN	ER lumen protein-retaining receptor 1 (KDEL endoplasmic reticulum protein retention receptor 1, KDEL receptor 1) (Putative MAPK-activating protein PM23)	KDELR1 ERD2.1	+			GOCC, TMHMM2.0				+	+	+		15
Q6P1A2	MBOA5_HUMAN	Lysophospholipid acyltransferase 5, LPLAT 5, EC 2.3.1.- (1-acylglycerophosphocholine O-acyltransferase, EC 2.3.1.23) (1-acylglycerophosphoethanolamine O-acyltransferase, EC 2.3.1.n7) (1-acylglycerophosphoserine O-acyltransferase, EC 2.3.1.n6) (Lysophosphatidylcholine acyltransferase, LPCAT, Lyso-PC acyltransferase) (Lysophosphatidylcholine acyltransferase 3, Lyso-PC acyltransferase 3) (Lysophosph…	LPCAT3 MBOAT5 OACT5	+			GOCC, TMHMM2.0					+			15
O15400	STX7_HUMAN	Syntaxin-7	STX7	+			GOCC, TMHMM2.0	+					+		15
A1L0T0	HACL2_HUMAN	2-hydroxyacyl-CoA lyase 2, EC 4.1.2.- (Acetolactate synthase-like protein) (IlvB-like protein)	ILVBL AHAS HACL2	+			GOCC, TMHMM2.0					+			15
Q9H061	T126A_HUMAN	Transmembrane protein 126A	TMEM126A	+			GOCC, TMHMM2.0		+						15
Q99720	SGMR1_HUMAN	Sigma non-opioid intracellular receptor 1 (Aging-associated gene 8 protein) (SR31747-binding protein, SR-BP) (Sigma 1-type opioid receptor, SIG-1R, Sigma1-receptor, Sigma1R, hSigmaR1)	SIGMAR1 OPRS1 SRBP AAG8	+			GOCC, TMHMM2.0			+		+			15
O75352	MPU1_HUMAN	Mannose-P-dolichol utilization defect 1 protein (Suppressor of Lec15 and Lec35 glycosylation mutation homolog, SL15)	MPDU1	+			GOCC, TMHMM2.0					+			15
P61073	CXCR4_HUMAN	C-X-C chemokine receptor type 4, CXC-R4, CXCR-4 (FB22) (Fusin) (HM89) (LCR1) (Leukocyte-derived seven transmembrane domain receptor, LESTR) (Lipopolysaccharide-associated protein 3, LAP-3, LPS-associated protein 3) (NPYRL) (Stromal cell-derived factor 1 receptor, SDF-1 receptor) (CD antigen CD184)	CXCR4	+			GOCC, TMHMM2.0	+							15
Q96SK2	TM209_HUMAN	Transmembrane protein 209	TMEM209	+			GOCC, TMHMM2.0							+	15
Q9UM00	TMCO1_HUMAN	Calcium load-activated calcium channel, CLAC channel (Transmembrane and coiled-coil domain-containing protein 1) (Transmembrane and coiled-coil domains protein 4) (Xenogeneic cross-immune protein PCIA3)	TMCO1 TMCC4 PNAS-10 PNAS-136 UNQ151/PRO177	+			GOCC, TMHMM2.0				+	+			15
Q9NYL4	FKB11_HUMAN	Peptidyl-prolyl cis-trans isomerase FKBP11, PPIase FKBP11, EC 5.2.1.8 (19 kDa FK506-binding protein, 19 kDa FKBP, FKBP-19) (FK506-binding protein 11, FKBP-11) (Rotamase)	FKBP11 FKBP19 UNQ336/PRO535	+			GOCC, TMHMM2.0							+	15
Q8NC56	LEMD2_HUMAN	LEM domain-containing protein 2, hLEM2	LEMD2	+			GOCC, TMHMM2.0			+					15
Q9P0J0	NDUAD_HUMAN	NADH dehydrogenase [ubiquinone] 1 alpha subcomplex subunit 13 (Cell death regulatory protein GRIM-19) (Complex I-B16.6, CI-B16.6) (Gene associated with retinoic and interferon-induced mortality 19 protein, GRIM-19, Gene associated with retinoic and IFN-induced mortality 19 protein) (NADH-ubiquinone oxidoreductase B16.6 subunit)	NDUFA13 GRIM19 CDA016 CGI-39	+			GOCC, TMHMM2.0		+						15
Q96A26	F162A_HUMAN	Protein FAM162A (E2-induced gene 5 protein) (Growth and transformation-dependent protein, HGTD-P)	FAM162A C3orf28 E2IG5 DC16 FWP001	+			GOCC, TMHMM2.0		+						15
Q9H2H9	S38A1_HUMAN	Sodium-coupled neutral amino acid transporter 1 (Amino acid transporter A1) (N-system amino acid transporter 2) (Solute carrier family 38 member 1) (System A amino acid transporter 1) (System N amino acid transporter 1)	SLC38A1 ATA1 NAT2 SAT1 SNAT1	+			GOCC, TMHMM2.0	+							15
O95169	NDUB8_HUMAN	NADH dehydrogenase [ubiquinone] 1 beta subcomplex subunit 8, mitochondrial (Complex I-ASHI, CI-ASHI) (NADH-ubiquinone oxidoreductase ASHI subunit)	NDUFB8	+			GOCC, TMHMM2.0		+						15
P61009	SPCS3_HUMAN	Signal peptidase complex subunit 3 (Microsomal signal peptidase 22/23 kDa subunit, SPC22/23, SPase 22/23 kDa subunit)	SPCS3 SPC22 UNQ1841/PRO3567	+			GOCC, TMHMM2.0					+			15
O00483	NDUA4_HUMAN	Cytochrome c oxidase subunit NDUFA4 (Complex I-MLRQ, CI-MLRQ) (NADH-ubiquinone oxidoreductase MLRQ subunit)	NDUFA4	+			GOCC, TMHMM2.0		+						15
P13473	LAMP2_HUMAN	Lysosome-associated membrane glycoprotein 2, LAMP-2, Lysosome-associated membrane protein 2 (CD107 antigen-like family member B) (LGP-96) (CD antigen CD107b)	LAMP2	+			GOCC, TMHMM2.0	+					+		15
O43676	NDUB3_HUMAN	NADH dehydrogenase [ubiquinone] 1 beta subcomplex subunit 3 (Complex I-B12, CI-B12) (NADH-ubiquinone oxidoreductase B12 subunit)	NDUFB3	+			GOCC, TMHMM2.0		+						15
Q16563	SYPL1_HUMAN	Synaptophysin-like protein 1 (Pantophysin)	SYPL1 SYPL	+			GOCC, TMHMM2.0	+					+		15
Q7Z2K6	ERMP1_HUMAN	Endoplasmic reticulum metallopeptidase 1, EC 3.4.-.- (Felix-ina)	ERMP1 FXNA KIAA1815	+			GOCC, TMHMM2.0					+			14
Q9BUR5	MIC26_HUMAN	MICOS complex subunit MIC26 (Apolipoprotein O) (MICOS complex subunit MIC23) (Protein FAM121B)	APOO FAM121B MIC23 MIC26 My025 UNQ1866/PRO4302	+			GOCC, TMHMM2.0		+		+	+			14
Q9Y673	ALG5_HUMAN	Dolichyl-phosphate beta-glucosyltransferase, DolP-glucosyltransferase, EC 2.4.1.117 (Asparagine-linked glycosylation protein 5 homolog)	ALG5 HSPC149	+			GOCC, TMHMM2.0					+			14
Q8N5K1	CISD2_HUMAN	CDGSH iron-sulfur domain-containing protein 2 (Endoplasmic reticulum intermembrane small protein) (MitoNEET-related 1 protein, Miner1) (Nutrient-deprivation autophagy factor-1, NAF-1)	CISD2 CDGSH2 ERIS ZCD2	+			GOCC, TMHMM2.0		+			+			14
Q6UW68	TM205_HUMAN	Transmembrane protein 205	TMEM205 UNQ501/PRO1018	+			GOCC, TMHMM2.0							+	14
P17813	EGLN_HUMAN	Endoglin (CD antigen CD105)	ENG END	+			GOCC, TMHMM2.0	+							14
Q96S97	MYADM_HUMAN	Myeloid-associated differentiation marker (Protein SB135)	MYADM UNQ553/PRO1110	+			GOCC, TMHMM2.0	+							14
Q7KZN9	COX15_HUMAN	Cytochrome c oxidase assembly protein COX15 homolog	COX15	+			GOCC, TMHMM2.0		+						14
Q9Y320	TMX2_HUMAN	Thioredoxin-related transmembrane protein 2 (Cell proliferation-inducing gene 26 protein) (Thioredoxin domain-containing protein 14)	TMX2 TXNDC14 CGI-31 My009 PIG26 PSEC0045 UNQ237/PRO270	+			GOCC, TMHMM2.0		+			+			14
P54709	AT1B3_HUMAN	Sodium/potassium-transporting ATPase subunit beta-3 (Sodium/potassium-dependent ATPase subunit beta-3, ATPB-3) (CD antigen CD298)	ATP1B3	+			GOCC, TMHMM2.0	+							14
L0R6Q1	S35U4_HUMAN	SLC35A4 upstream open reading frame protein	SLC35A4	+			GOCC, TMHMM2.0							+	14
Q8TED1	GPX8_HUMAN	Probable glutathione peroxidase 8, GPx-8, GSHPx-8, EC 1.11.1.9	GPX8 UNQ847/PRO1785	+			GOCC, TMHMM2.0							+	14
Q8N0U8	VKORL_HUMAN	Vitamin K epoxide reductase complex subunit 1-like protein 1, VKORC1-like protein 1, EC 1.17.4.4	VKORC1L1	+			GOCC, TMHMM2.0					+			14
P03915	NU5M_HUMAN	NADH-ubiquinone oxidoreductase chain 5, EC 7.1.1.2 (NADH dehydrogenase subunit 5)	MT-ND5 MTND5 NADH5 ND5	+			GOCC, TMHMM2.0		+						13
Q96QD8	S38A2_HUMAN	Sodium-coupled neutral amino acid transporter 2 (Amino acid transporter A2) (Protein 40-9-1) (Solute carrier family 38 member 2) (System A amino acid transporter 2) (System A transporter 1) (System N amino acid transporter 2)	SLC38A2 ATA2 KIAA1382 SAT2 SNAT2	+			GOCC, TMHMM2.0	+							13
P23634	AT2B4_HUMAN	Plasma membrane calcium-transporting ATPase 4, PMCA4, EC 7.2.2.10 (Matrix-remodeling-associated protein 1) (Plasma membrane calcium ATPase isoform 4) (Plasma membrane calcium pump isoform 4)	ATP2B4 ATP2B2 MXRA1	+			GOCC, TMHMM2.0	+							13
Q6P1M0	S27A4_HUMAN	Long-chain fatty acid transport protein 4, FATP-4, Fatty acid transport protein 4 (Arachidonate--CoA ligase, EC 6.2.1.15) (Long-chain-fatty-acid--CoA ligase, EC 6.2.1.3) (Solute carrier family 27 member 4) (Very long-chain acyl-CoA synthetase 4, ACSVL4, EC 6.2.1.-)	SLC27A4 ACSVL4 FATP4	+			GOCC, TMHMM2.0	+				+			13
P48651	PTSS1_HUMAN	Phosphatidylserine synthase 1, PSS-1, PtdSer synthase 1, EC 2.7.8.29 (Serine-exchange enzyme I)	PTDSS1 KIAA0024 PSSA	+			GOCC, TMHMM2.0					+			13
P33947	ERD22_HUMAN	ER lumen protein-retaining receptor 2 (ERD2-like protein 1, ELP-1) (KDEL endoplasmic reticulum protein retention receptor 2, KDEL receptor 2)	KDELR2 ERD2.2	+			GOCC, TMHMM2.0				+	+	+		13
Q9NXE4	NSMA3_HUMAN	Sphingomyelin phosphodiesterase 4, EC 3.1.4.12 (Neutral sphingomyelinase 3, nSMase-3, nSMase3) (Neutral sphingomyelinase III)	SMPD4 KIAA1418 SKNY	+			GOCC, TMHMM2.0			+	+	+			13
P56134	ATPK_HUMAN	ATP synthase subunit f, mitochondrial (ATP synthase membrane subunit f)	ATP5MF ATP5J2 ATP5JL	+			GOCC, TMHMM2.0		+	+					13
P05067	A4_HUMAN	Amyloid-beta precursor protein, APP (ABPP) (APPI) (Alzheimer disease amyloid A4 protein homolog) (Alzheimer disease amyloid protein) (Amyloid precursor protein) (Amyloid-beta (A4) precursor protein) (Amyloid-beta A4 protein) (Cerebral vascular amyloid peptide, CVAP) (PreA4) (Protease nexin-II, PN-II) [Cleaved into: N-APP; Soluble APP-alpha, S-APP-alpha; Soluble APP-beta, S-APP-beta; C99 (Beta-sec…	APP A4 AD1	+			GOCC, TMHMM2.0	+		+					13
P48509	CD151_HUMAN	CD151 antigen (GP27) (Membrane glycoprotein SFA-1) (Platelet-endothelial tetraspan antigen 3, PETA-3) (Tetraspanin-24, Tspan-24) (CD antigen CD151)	CD151 TSPAN24	+			GOCC, TMHMM2.0	+							13
Q15629	TRAM1_HUMAN	Translocating chain-associated membrane protein 1, Protein TRAM1	TRAM1 TRAM	+			GOCC, TMHMM2.0					+			13
O75787	RENR_HUMAN	Renin receptor (ATPase H(+)-transporting lysosomal accessory protein 2) (ATPase H(+)-transporting lysosomal-interacting protein 2) (ER-localized type I transmembrane adapter) (Embryonic liver differentiation factor 10) (N14F) (Renin/prorenin receptor) (Vacuolar ATP synthase membrane sector-associated protein M8-9, ATP6M8-9, V-ATPase M8.9 subunit) [Cleaved into: Renin receptor N-terminal fragment;…	ATP6AP2 ATP6IP2 CAPER ELDF10 HT028 MSTP009 PSEC0072	+			GOCC, TMHMM2.0	+			+	+	+		13
O14828	SCAM3_HUMAN	Secretory carrier-associated membrane protein 3, Secretory carrier membrane protein 3	SCAMP3 C1orf3 PROPIN1	+			GOCC, TMHMM2.0						+		12
Q5VT66	MARC1_HUMAN	Mitochondrial amidoxime-reducing component 1, mARC1, EC 1.7.-.- (Molybdenum cofactor sulfurase C-terminal domain-containing protein 1, MOSC domain-containing protein 1, Moco sulfurase C-terminal domain-containing protein 1)	MTARC1 MARC1 MOSC1	+			GOCC, TMHMM2.0		+						12
P63027	VAMP2_HUMAN	Vesicle-associated membrane protein 2, VAMP-2 (Synaptobrevin-2)	VAMP2 SYB2	+			GOCC, TMHMM2.0	+					+		12
Q9P0I2	EMC3_HUMAN	ER membrane protein complex subunit 3 (Transmembrane protein 111)	EMC3 TMEM111	+			GOCC, TMHMM2.0					+			12
Q5ZPR3	CD276_HUMAN	CD276 antigen (4Ig-B7-H3) (B7 homolog 3, B7-H3) (Costimulatory molecule) (CD antigen CD276)	CD276 B7H3 PSEC0249 UNQ309/PRO352	+			GOCC, TMHMM2.0	+							12
P30519	HMOX2_HUMAN	Heme oxygenase 2, HO-2, EC 1.14.14.18 [Cleaved into: Heme oxygenase 2 soluble form ]	HMOX2 HO2	+			GOCC, TMHMM2.0	+				+			12
Q96S66	CLCC1_HUMAN	Chloride channel CLIC-like protein 1 (Mid-1-related chloride channel protein 1)	CLCC1 KIAA0761 MCLC	+			GOCC, TMHMM2.0			+	+	+			12
O60488	ACSL4_HUMAN	Long-chain-fatty-acid--CoA ligase 4, EC 6.2.1.3 (Arachidonate--CoA ligase, EC 6.2.1.15) (Long-chain acyl-CoA synthetase 4, LACS 4)	ACSL4 ACS4 FACL4 LACS4	+			GOCC, TMHMM2.0	+	+			+	+		12
Q96HY6	DDRGK_HUMAN	DDRGK domain-containing protein 1 (Dashurin) (UFM1-binding and PCI domain-containing protein 1)	DDRGK1 C20orf116 UFBP1	+			GOCC, TMHMM2.0					+			12
P09758	TACD2_HUMAN	Tumor-associated calcium signal transducer 2 (Cell surface glycoprotein Trop-2) (Membrane component chromosome 1 surface marker 1) (Pancreatic carcinoma marker protein GA733-1)	TACSTD2 GA733-1 M1S1 TROP2	+			GOCC, TMHMM2.0	+							12
Q6PIU2	NCEH1_HUMAN	Neutral cholesterol ester hydrolase 1, NCEH, EC 3.1.1.- (Acetylalkylglycerol acetylhydrolase, 2-acetyl MAGE hydrolase, EC 3.1.1.71) (Arylacetamide deacetylase-like 1)	NCEH1 AADACL1 KIAA1363	+			GOCC, TMHMM2.0	+				+			12
Q9UDW1	QCR9_HUMAN	Cytochrome b-c1 complex subunit 9 (Complex III subunit 9) (Complex III subunit X) (Cytochrome c1 non-heme 7 kDa protein) (Ubiquinol-cytochrome c reductase complex 7.2 kDa protein)	UQCR10 UCRC HSPC119	+			GOCC, TMHMM2.0		+						12
P21926	CD9_HUMAN	CD9 antigen (5H9 antigen) (Cell growth-inhibiting gene 2 protein) (Leukocyte antigen MIC3) (Motility-related protein, MRP-1) (Tetraspanin-29, Tspan-29) (p24) (CD antigen CD9)	CD9 MIC3 TSPAN29 GIG2	+			GOCC, TMHMM2.0	+					+		12
Q9P0U1	TOM7_HUMAN	Mitochondrial import receptor subunit TOM7 homolog (Translocase of outer membrane 7 kDa subunit homolog)	TOMM7 TOM7 TOMM07 AD-014	+			GOCC, TMHMM2.0		+						12
P01893	HLAH_HUMAN	Putative HLA class I histocompatibility antigen, alpha chain H (HLA-12.4) (HLA-AR) (MHC class I antigen H)	HLA-H HLAH	+			GOCC, TMHMM2.0	+			+	+	+		11
Q9NX47	MARH5_HUMAN	E3 ubiquitin-protein ligase MARCHF5, EC 2.3.2.27 (Membrane-associated RING finger protein 5) (Membrane-associated RING-CH protein V, MARCH-V) (Mitochondrial ubiquitin ligase, MITOL) (RING finger protein 153) (RING-type E3 ubiquitin transferase MARCHF5)	MARCHF5 MARCH5 RNF153	+			GOCC, TMHMM2.0		+			+			11
Q9Y6K0	CEPT1_HUMAN	Choline/ethanolaminephosphotransferase 1, hCEPT1, EC 2.7.8.1, EC 2.7.8.2 (1-alkenyl-2-acylglycerol choline phosphotransferase, EC 2.7.8.22)	CEPT1 PRO1101	+			GOCC, TMHMM2.0			+		+			11
O00400	ACATN_HUMAN	Acetyl-coenzyme A transporter 1, AT-1, Acetyl-CoA transporter 1 (Solute carrier family 33 member 1)	SLC33A1 ACATN AT1	+			GOCC, TMHMM2.0	+			+	+			11
Q969N2	PIGT_HUMAN	GPI transamidase component PIG-T (Phosphatidylinositol-glycan biosynthesis class T protein)	PIGT CGI-06 PSEC0163 UNQ716/PRO1379	+			GOCC, TMHMM2.0					+			11
O60831	PRAF2_HUMAN	PRA1 family protein 2	PRAF2 JM4	+			GOCC, TMHMM2.0						+		11
Q14108	SCRB2_HUMAN	Lysosome membrane protein 2 (85 kDa lysosomal membrane sialoglycoprotein, LGP85) (CD36 antigen-like 2) (Lysosome membrane protein II, LIMP II) (Scavenger receptor class B member 2) (CD antigen CD36)	SCARB2 CD36L2 LIMP2 LIMPII	+			GOCC, TMHMM2.0	+			+	+	+		11
O14925	TIM23_HUMAN	Mitochondrial import inner membrane translocase subunit Tim23	TIMM23 TIM23	+			GOCC, TMHMM2.0		+						11
Q5J8M3	EMC4_HUMAN	ER membrane protein complex subunit 4 (Cell proliferation-inducing gene 17 protein) (Transmembrane protein 85)	EMC4 TMEM85 HSPC184 PIG17	+			GOCC, TMHMM2.0					+			11
O95168	NDUB4_HUMAN	NADH dehydrogenase [ubiquinone] 1 beta subcomplex subunit 4 (Complex I-B15, CI-B15) (NADH-ubiquinone oxidoreductase B15 subunit)	NDUFB4	+			GOCC, TMHMM2.0		+						11
Q9NPA0	EMC7_HUMAN	ER membrane protein complex subunit 7	EMC7 C11orf3 C15orf24 HT022 UNQ905/PRO1926	+			GOCC, TMHMM2.0					+			11
Q96HS1	PGAM5_HUMAN	Serine/threonine-protein phosphatase PGAM5, mitochondrial, EC 3.1.3.16 (Bcl-XL-binding protein v68) (Phosphoglycerate mutase family member 5)	PGAM5	+			GOCC, TMHMM2.0		+						11
Q92542	NICA_HUMAN	Nicastrin	NCSTN KIAA0253 UNQ1874/PRO4317	+			GOCC, TMHMM2.0	+			+	+	+		11
Q99442	SEC62_HUMAN	Translocation protein SEC62 (Translocation protein 1, TP-1, hTP-1)	SEC62 TLOC1	+			GOCC, TMHMM2.0					+			11
P30536	TSPO_HUMAN	Translocator protein (Mitochondrial benzodiazepine receptor) (PKBS) (Peripheral-type benzodiazepine receptor, PBR)	TSPO BZRP MBR	+			GOCC, TMHMM2.0		+						11
Q9P0T7	TMEM9_HUMAN	Proton-transporting V-type ATPase complex assembly regulator TMEM9, v-ATPase assembly regulator TMEM9 (Dermal papilla-derived protein 4) (Transmembrane protein 9, Protein TMEM9)	TMEM9 DERP4 TMEM9A HSPC186 PSEC0012 UNQ631/PRO1248	+			GOCC, TMHMM2.0						+		10
O15258	RER1_HUMAN	Protein RER1	RER1	+			GOCC, TMHMM2.0	+			+	+			10
O15321	TM9S1_HUMAN	Transmembrane 9 superfamily member 1 (MP70 protein family member, hMP70)	TM9SF1	+			GOCC, TMHMM2.0						+		10
Q9NW15	ANO10_HUMAN	Anoctamin-10 (Transmembrane protein 16K)	ANO10 TMEM16K	+			GOCC, TMHMM2.0	+							10
Q8IXI2	MIRO1_HUMAN	Mitochondrial Rho GTPase 1, MIRO-1, hMiro-1, EC 3.6.5.- (Rac-GTP-binding protein-like protein) (Ras homolog gene family member T1)	RHOT1 ARHT1	+			GOCC, TMHMM2.0		+						10
Q8NFQ8	TOIP2_HUMAN	Torsin-1A-interacting protein 2 (Lumenal domain-like LAP1)	TOR1AIP2 IFRG15 LULL1	+			GOCC, TMHMM2.0			+		+			10
P60602	ROMO1_HUMAN	Reactive oxygen species modulator 1, ROS modulator 1 (Epididymis tissue protein Li 175) (Glyrichin) (Mitochondrial targeting GxxxG motif protein, MTGM) (Protein MGR2 homolog)	ROMO1 C20orf52	+			GOCC, TMHMM2.0		+						10
Q9Y6A9	SPCS1_HUMAN	Signal peptidase complex subunit 1 (Microsomal signal peptidase 12 kDa subunit, SPase 12 kDa subunit)	SPCS1 SPC12 HSPC033	+			GOCC, TMHMM2.0					+			10
Q17RY6	LY6K_HUMAN	Lymphocyte antigen 6K, Ly-6K	LY6K CO16	+			GOCC, TMHMM2.0	+							10
Q9H3K2	GHITM_HUMAN	Growth hormone-inducible transmembrane protein (Dermal papilla-derived protein 2) (Mitochondrial morphology and cristae structure 1, MICS1) (Transmembrane BAX inhibitor motif-containing protein 5)	GHITM DERP2 MICS1 TMBIM5 My021 UNQ244/PRO281	+			GOCC, TMHMM2.0		+						10
Q9BQE5	APOL2_HUMAN	Apolipoprotein L2 (Apolipoprotein L-II, ApoL-II)	APOL2	+			GOCC, TMHMM2.0					+			10
Q8N5M9	JAGN1_HUMAN	Protein jagunal homolog 1	JAGN1	+			GOCC, TMHMM2.0					+			10
Q9BVC6	TM109_HUMAN	Transmembrane protein 109 (Mitsugumin-23, Mg23)	TMEM109	+			GOCC, TMHMM2.0			+					10
P03905	NU4M_HUMAN	NADH-ubiquinone oxidoreductase chain 4, EC 7.1.1.2 (NADH dehydrogenase subunit 4)	MT-ND4 MTND4 NADH4 ND4	+			GOCC, TMHMM2.0		+						10
O95167	NDUA3_HUMAN	NADH dehydrogenase [ubiquinone] 1 alpha subcomplex subunit 3 (Complex I-B9, CI-B9) (NADH-ubiquinone oxidoreductase B9 subunit)	NDUFA3	+			GOCC, TMHMM2.0		+						10
Q99643	C560_HUMAN	Succinate dehydrogenase cytochrome b560 subunit, mitochondrial (Integral membrane protein CII-3) (QPs-1, QPs1) (Succinate dehydrogenase complex subunit C) (Succinate-ubiquinone oxidoreductase cytochrome B large subunit, CYBL)	SDHC CYB560 SDH3	+			GOCC, TMHMM2.0		+						10
P00846	ATP6_HUMAN	ATP synthase subunit a (F-ATPase protein 6)	MT-ATP6 ATP6 ATPASE6 MTATP6	+			GOCC, TMHMM2.0		+						10
Q9HCN8	SDF2L_HUMAN	Stromal cell-derived factor 2-like protein 1, SDF2-like protein 1 (PWP1-interacting protein 8)	SDF2L1 UNQ1941/PRO4424	+			GOCC, TMHMM2.0							+	9
P17342	ANPRC_HUMAN	Atrial natriuretic peptide receptor 3 (Atrial natriuretic peptide clearance receptor) (Atrial natriuretic peptide receptor type C, ANP-C, ANPR-C, NPR-C)	NPR3 ANPRC C5orf23 NPRC	+			GOCC, TMHMM2.0	+							9
O14548	COX7R_HUMAN	Cytochrome c oxidase subunit 7A-related protein, mitochondrial (COX7a-related protein) (Cytochrome c oxidase subunit VIIa-related protein) (EB1)	COX7A2L COX7AR COX7RP	+			GOCC, TMHMM2.0		+						9
Q9H330	TM245_HUMAN	Transmembrane protein 245 (Protein CG-2)	TMEM245 C9orf5	+			GOCC, TMHMM2.0							+	9
O95070	YIF1A_HUMAN	Protein YIF1A (54TMp) (YIP1-interacting factor homolog A)	YIF1A 54TM HYIF1P YIF1	+			GOCC, TMHMM2.0				+	+			9
Q6ZXV5	TMTC3_HUMAN	Protein O-mannosyl-transferase TMTC3, EC 2.4.1.109 (Protein SMILE) (Transmembrane and TPR repeat-containing protein 3)	TMTC3	+			GOCC, TMHMM2.0							+	9
Q6UWP7	LCLT1_HUMAN	Lysocardiolipin acyltransferase 1, EC 2.3.1.- (1-acylglycerol-3-phosphate O-acyltransferase 8, 1-AGP acyltransferase 8, 1-AGPAT 8, EC 2.3.1.51) (Acyl-CoA:lysocardiolipin acyltransferase 1)	LCLAT1 AGPAT8 ALCAT1 LYCAT UNQ1849/PRO3579	+			GOCC, TMHMM2.0					+			9
Q9BQB6	VKOR1_HUMAN	Vitamin K epoxide reductase complex subunit 1, EC 1.17.4.4 (Vitamin K1 2,3-epoxide reductase subunit 1)	VKORC1 VKOR MSTP134 MSTP576 UNQ308/PRO351	+			GOCC, TMHMM2.0					+			9
Q9P2X0	DPM3_HUMAN	Dolichol-phosphate mannosyltransferase subunit 3 (Dolichol-phosphate mannose synthase subunit 3, DPM synthase subunit 3) (Dolichyl-phosphate beta-D-mannosyltransferase subunit 3) (Mannose-P-dolichol synthase subunit 3, MPD synthase subunit 3) (Prostin-1)	DPM3	+			GOCC, TMHMM2.0					+			9
O95297	MPZL1_HUMAN	Myelin protein zero-like protein 1 (Protein zero-related)	MPZL1 PZR UNQ849/PRO1787	+			GOCC, TMHMM2.0	+							9
Q9Y3A6	TMED5_HUMAN	Transmembrane emp24 domain-containing protein 5 (p24 family protein gamma-2, p24gamma2) (p28)	TMED5 CGI-100 UNQ397/PRO733	+			GOCC, TMHMM2.0				+	+			9
Q96IX5	ATPMK_HUMAN	ATP synthase membrane subunit K, mitochondrial (ATP synthase membrane subunit DAPIT, mitochondrial) (Diabetes-associated protein in insulin-sensitive tissues) (HCV F-transactivated protein 2) (Up-regulated during skeletal muscle growth protein 5)	ATP5MK ATP5MD DAPIT HCVFTP2 USMG5 PD04912	+			GOCC, TMHMM2.0		+						9
Q04941	PLP2_HUMAN	Proteolipid protein 2 (Differentiation-dependent protein A4) (Intestinal membrane A4 protein)	PLP2 A4	+			GOCC, TMHMM2.0	+				+			9
Q9UKR5	ERG28_HUMAN	Ergosterol biosynthetic protein 28 homolog	ERG28 C14orf1 AD-011 HSPC288 x0006	+			GOCC, TMHMM2.0					+			9
Q99735	MGST2_HUMAN	Microsomal glutathione S-transferase 2, Microsomal GST-2, EC 2.5.1.18 (Glutathione peroxidase MGST2, EC 1.11.1.-) (Leukotriene C4 synthase MGST2, EC 4.4.1.20) (Microsomal glutathione S-transferase II, Microsomal GST-II)	MGST2 GST2	+			GOCC, TMHMM2.0	+		+		+			9
P00156	CYB_HUMAN	Cytochrome b (Complex III subunit 3) (Complex III subunit III) (Cytochrome b-c1 complex subunit 3) (Ubiquinol-cytochrome-c reductase complex cytochrome b subunit)	MT-CYB COB CYTB MTCYB	+			GOCC, TMHMM2.0		+						9
Q15388	TOM20_HUMAN	Mitochondrial import receptor subunit TOM20 homolog (Mitochondrial 20 kDa outer membrane protein) (Outer mitochondrial membrane receptor Tom20)	TOMM20 KIAA0016	+			GOCC, TMHMM2.0		+			+			9
Q9Y653	AGRG1_HUMAN	Adhesion G-protein coupled receptor G1 (G-protein coupled receptor 56) (Protein TM7XN1) [Cleaved into: ADGRG1 N-terminal fragment, ADGRG1 NT (GPR56 N-terminal fragment, GPR56 NT, GPR56(N)) (GPR56 extracellular subunit) (GPR56 subunit alpha); ADGRG1 C-terminal fragment, ADGRG1 CT (GPR56 C-terminal fragment, GPR56 CT, GPR56(C)) (GPR56 seven-transmembrane subunit, GPR56 7TM) (GPR56 subunit beta) ]	ADGRG1 GPR56 TM7LN4 TM7XN1 UNQ540/PRO1083	+			GOCC, TMHMM2.0	+							8
Q9UKX5	ITA11_HUMAN	Integrin alpha-11	ITGA11 MSTP018	+			GOCC, TMHMM2.0	+							8
P60033	CD81_HUMAN	CD81 antigen (26 kDa cell surface protein TAPA-1) (Target of the antiproliferative antibody 1) (Tetraspanin-28, Tspan-28) (CD antigen CD81)	CD81 TAPA1 TSPAN28	+			GOCC, TMHMM2.0	+							8
Q9HD20	AT131_HUMAN	Endoplasmic reticulum transmembrane helix translocase, EC 7.4.2.- (Endoplasmic reticulum P5A-ATPase)	ATP13A1 ATP13A KIAA1825 CGI-152	+			GOCC, TMHMM2.0					+			8
Q9NZV1	CRIM1_HUMAN	Cysteine-rich motor neuron 1 protein, CRIM-1 (Cysteine-rich repeat-containing protein S52) [Cleaved into: Processed cysteine-rich motor neuron 1 protein ]	CRIM1 S52 UNQ1886/PRO4330	+			GOCC, TMHMM2.0	+							8
Q15043	S39AE_HUMAN	Metal cation symporter ZIP14 (LIV-1 subfamily of ZIP zinc transporter 4, LZT-Hs4) (Solute carrier family 39 member 14) (Zrt- and Irt-like protein 14, ZIP-14)	SLC39A14 KIAA0062 ZIP14	+			GOCC, TMHMM2.0	+					+		8
O95139	NDUB6_HUMAN	NADH dehydrogenase [ubiquinone] 1 beta subcomplex subunit 6 (Complex I-B17, CI-B17) (NADH-ubiquinone oxidoreductase B17 subunit)	NDUFB6	+			GOCC, TMHMM2.0		+						8
Q86Y39	NDUAB_HUMAN	NADH dehydrogenase [ubiquinone] 1 alpha subcomplex subunit 11 (Complex I-B14.7, CI-B14.7) (NADH-ubiquinone oxidoreductase subunit B14.7)	NDUFA11	+			GOCC, TMHMM2.0		+						8
Q9HBL7	PLRKT_HUMAN	Plasminogen receptor (KT), Plg-R(KT)	PLGRKT C9orf46 AD025 MDS030	+			GOCC, TMHMM2.0	+							8
Q9GZP9	DERL2_HUMAN	Derlin-2 (Degradation in endoplasmic reticulum protein 2, DERtrin-2) (Der1-like protein 2) (F-LAN-1) (F-LANa)	DERL2 DER2 FLANA CGI-101 SBBI53	+			GOCC, TMHMM2.0					+			8
Q8IXM6	NRM_HUMAN	Nurim (Nuclear envelope membrane protein) (Nuclear rim protein)	NRM NRM29 UNQ555/PRO1112	+			GOCC, TMHMM2.0			+					8
Q8N4V1	EMC5_HUMAN	ER membrane protein complex subunit 5 (Membrane magnesium transporter 1) (Transmembrane protein 32)	MMGT1 EMC5 TMEM32	+			GOCC, TMHMM2.0	+			+	+	+		8
Q9BV40	VAMP8_HUMAN	Vesicle-associated membrane protein 8, VAMP-8 (Endobrevin, EDB)	VAMP8	+			GOCC, TMHMM2.0	+					+		8
Q15041	AR6P1_HUMAN	ADP-ribosylation factor-like protein 6-interacting protein 1, ARL-6-interacting protein 1, Aip-1 (Apoptotic regulator in the membrane of the endoplasmic reticulum)	ARL6IP1 ARL6IP ARMER KIAA0069	+			GOCC, TMHMM2.0					+			8
O14967	CLGN_HUMAN	Calmegin	CLGN	+			GOCC, TMHMM2.0					+			8
P08581	MET_HUMAN	Hepatocyte growth factor receptor, HGF receptor, EC 2.7.10.1 (HGF/SF receptor) (Proto-oncogene c-Met) (Scatter factor receptor, SF receptor) (Tyrosine-protein kinase Met)	MET	+			GOCC, TMHMM2.0	+							7
Q8NFJ5	RAI3_HUMAN	Retinoic acid-induced protein 3 (G-protein coupled receptor family C group 5 member A) (Phorbol ester induced gene 1, PEIG-1) (Retinoic acid-induced gene 1 protein, RAIG-1)	GPRC5A GPCR5A RAI3 RAIG1	+			GOCC, TMHMM2.0	+					+		7
P27338	AOFB_HUMAN	Amine oxidase [flavin-containing] B, EC 1.4.3.21, EC 1.4.3.4 (Monoamine oxidase type B, MAO-B)	MAOB	+			GOCC, TMHMM2.0		+						7
P10586	PTPRF_HUMAN	Receptor-type tyrosine-protein phosphatase F, EC 3.1.3.48 (Leukocyte common antigen related, LAR)	PTPRF LAR	+			GOCC, TMHMM2.0	+							7
Q92504	S39A7_HUMAN	Zinc transporter SLC39A7 (Histidine-rich membrane protein Ke4) (Really interesting new gene 5 protein) (Solute carrier family 39 member 7) (Zrt-, Irt-like protein 7, ZIP7)	SLC39A7 HKE4 RING5	+			GOCC, TMHMM2.0					+			7
P98194	AT2C1_HUMAN	Calcium-transporting ATPase type 2C member 1, ATPase 2C1, EC 7.2.2.10 (ATP-dependent Ca(2+) pump PMR1) (Ca(2+)/Mn(2+)-ATPase 2C1) (Secretory pathway Ca(2+)-transporting ATPase type 1, SPCA1)	ATP2C1 KIAA1347 PMR1L HUSSY-28	+			GOCC, TMHMM2.0	+			+				7
Q6AZY7	SCAR3_HUMAN	Scavenger receptor class A member 3 (Cellular stress response gene protein)	SCARA3 CSR	+			GOCC, TMHMM2.0				+	+			7
Q99808	S29A1_HUMAN	Equilibrative nucleoside transporter 1 (Equilibrative nitrobenzylmercaptopurine riboside-sensitive nucleoside transporter, Equilibrative NBMPR-sensitive nucleoside transporter) (Nucleoside transporter, es-type) (Solute carrier family 29 member 1)	SLC29A1 ENT1	+			GOCC, TMHMM2.0	+							7
O14735	CDIPT_HUMAN	CDP-diacylglycerol--inositol 3-phosphatidyltransferase, EC 2.7.8.11 (Phosphatidylinositol synthase, PI synthase, PtdIns synthase)	CDIPT PIS PIS1	+			GOCC, TMHMM2.0	+				+			7
Q15800	MSMO1_HUMAN	Methylsterol monooxygenase 1, EC 1.14.18.9 (C-4 methylsterol oxidase) (Sterol-C4-methyl oxidase)	MSMO1 DESP4 ERG25 SC4MOL	+			GOCC, TMHMM2.0	+				+			7
Q96GC9	VMP1_HUMAN	Vacuole membrane protein 1 (Transmembrane protein 49)	VMP1 TDC1 TMEM49 HSPC292	+			GOCC, TMHMM2.0	+			+	+			7
P25106	ACKR3_HUMAN	Atypical chemokine receptor 3 (C-X-C chemokine receptor type 7, CXC-R7, CXCR-7) (Chemokine orphan receptor 1) (G-protein coupled receptor 159) (G-protein coupled receptor RDC1 homolog, RDC-1)	ACKR3 CMKOR1 CXCR7 GPR159 RDC1	+			GOCC, TMHMM2.0	+							7
Q13445	TMED1_HUMAN	Transmembrane emp24 domain-containing protein 1 (Interleukin-1 receptor-like 1 ligand) (Putative T1/ST2 receptor-binding protein) (p24 family protein gamma-1, Tp24, p24gamma1)	TMED1 IL1RL1L IL1RL1LG	+			GOCC, TMHMM2.0	+			+	+			7
Q15904	VAS1_HUMAN	V-type proton ATPase subunit S1, V-ATPase subunit S1 (Protein XAP-3) (V-ATPase Ac45 subunit) (V-ATPase S1 accessory protein) (Vacuolar proton pump subunit S1)	ATP6AP1 ATP6IP1 ATP6S1 VATPS1 XAP3	+			GOCC, TMHMM2.0	+			+	+	+		7
Q99943	PLCA_HUMAN	1-acyl-sn-glycerol-3-phosphate acyltransferase alpha, EC 2.3.1.51 (1-acylglycerol-3-phosphate O-acyltransferase 1, 1-AGP acyltransferase 1, 1-AGPAT 1) (Lysophosphatidic acid acyltransferase alpha, LPAAT-alpha) (Protein G15)	AGPAT1 G15	+			GOCC, TMHMM2.0					+			7
O43760	SNG2_HUMAN	Synaptogyrin-2 (Cellugyrin)	SYNGR2 UNQ352/PRO615	+			GOCC, TMHMM2.0						+		7
O43292	GPAA1_HUMAN	Glycosylphosphatidylinositol anchor attachment 1 protein, GPI anchor attachment protein 1 (GAA1 protein homolog, hGAA1)	GPAA1 GAA1	+			GOCC, TMHMM2.0					+			7
Q658P3	STEA3_HUMAN	Metalloreductase STEAP3, EC 1.16.1.- (Dudulin-2) (Six-transmembrane epithelial antigen of prostate 3) (Tumor suppressor-activated pathway protein 6, hTSAP6) (pHyde, hpHyde)	STEAP3 TSAP6	+			GOCC, TMHMM2.0	+					+		7
Q9Y2R0	COA3_HUMAN	Cytochrome c oxidase assembly factor 3 homolog, mitochondrial (Coiled-coil domain-containing protein 56) (Mitochondrial translation regulation assembly intermediate of cytochrome c oxidase protein of 12 kDa)	COA3 CCDC56 MITRAC12 HSPC009	+			GOCC, TMHMM2.0		+						7
P19256	LFA3_HUMAN	Lymphocyte function-associated antigen 3, Ag3 (Surface glycoprotein LFA-3) (CD antigen CD58)	CD58 LFA3	+			GOCC, TMHMM2.0	+							7
Q92536	YLAT2_HUMAN	Y+L amino acid transporter 2 (Cationic amino acid transporter, y+ system) (Solute carrier family 7 member 6) (y(+)L-type amino acid transporter 2, Y+LAT2, y+LAT-2)	SLC7A6 KIAA0245	+			GOCC, TMHMM2.0	+							7
Q86XL3	ANKL2_HUMAN	Ankyrin repeat and LEM domain-containing protein 2 (LEM domain-containing protein 4)	ANKLE2 KIAA0692 LEM4	+			GOCC, TMHMM2.0					+			6
Q96S52	PIGS_HUMAN	GPI transamidase component PIG-S (Phosphatidylinositol-glycan biosynthesis class S protein)	PIGS UNQ1873/PRO4316	+			GOCC, TMHMM2.0					+			6
Q16611	BAK_HUMAN	Bcl-2 homologous antagonist/killer (Apoptosis regulator BAK) (Bcl-2-like protein 7, Bcl2-L-7)	BAK1 BAK BCL2L7 CDN1	+			GOCC, TMHMM2.0		+						6
Q5BJH7	YIF1B_HUMAN	Protein YIF1B (YIP1-interacting factor homolog B)	YIF1B PP4519 UNQ3073/PRO9905	+			GOCC, TMHMM2.0				+	+			6
O75907	DGAT1_HUMAN	Diacylglycerol O-acyltransferase 1, EC 2.3.1.20 (ACAT-related gene product 1) (Acyl-CoA retinol O-fatty-acyltransferase, ARAT, Retinol O-fatty-acyltransferase, EC 2.3.1.76) (Diglyceride acyltransferase)	DGAT1 AGRP1 DGAT	+			GOCC, TMHMM2.0	+				+			6
Q9Y584	TIM22_HUMAN	Mitochondrial import inner membrane translocase subunit Tim22 (Testis-expressed protein 4)	TIMM22 TEX4 TIM22	+			GOCC, TMHMM2.0		+						6
Q9Y2U8	MAN1_HUMAN	Inner nuclear membrane protein Man1 (LEM domain-containing protein 3)	LEMD3 MAN1	+			GOCC, TMHMM2.0			+					6
Q99595	TI17A_HUMAN	Mitochondrial import inner membrane translocase subunit Tim17-A (Inner membrane preprotein translocase Tim17a)	TIMM17A MIMT17 TIM17 TIM17A TIMM17	+			GOCC, TMHMM2.0		+						6
Q8NBN3	TM87A_HUMAN	Transmembrane protein 87A	TMEM87A PSEC0094	+			GOCC, TMHMM2.0				+				6
O15121	DEGS1_HUMAN	Sphingolipid delta(4)-desaturase DES1, EC 1.14.19.17 (Cell migration-inducing gene 15 protein) (Degenerative spermatocyte homolog 1) (Dihydroceramide desaturase-1) (Membrane lipid desaturase) (Retinol isomerase, EC 5.2.1.-)	DEGS1 DES1 MLD MIG15	+			GOCC, TMHMM2.0	+	+			+			6
Q9HCU5	PREB_HUMAN	Prolactin regulatory element-binding protein (Mammalian guanine nucleotide exchange factor mSec12)	PREB SEC12	+			GOCC, TMHMM2.0					+			6
Q9H8H3	MET7A_HUMAN	Putative methyltransferase-like protein 7A, EC 2.1.1.- (Protein AAM-B)	METTL7A PRO0066 UNQ1902/PRO4348	+			GOCC, TMHMM2.0							+	6
Q13190	STX5_HUMAN	Syntaxin-5	STX5 STX5A	+			GOCC, TMHMM2.0				+	+	+		6
Q9BXK5	B2L13_HUMAN	Bcl-2-like protein 13, Bcl2-L-13 (Bcl-rambo) (Protein Mil1)	BCL2L13 MIL1 CD003	+			GOCC, TMHMM2.0		+						6
Q9Y5U9	IR3IP_HUMAN	Immediate early response 3-interacting protein 1	IER3IP1 HSPC039	+			GOCC, TMHMM2.0				+	+			6
Q8TB36	GDAP1_HUMAN	Ganglioside-induced differentiation-associated protein 1, GDAP1	GDAP1	+			GOCC, TMHMM2.0		+				+		6
Q92896	GSLG1_HUMAN	Golgi apparatus protein 1 (CFR-1) (Cysteine-rich fibroblast growth factor receptor) (E-selectin ligand 1, ESL-1) (Golgi sialoglycoprotein MG-160)	GLG1 CFR1 ESL1 MG160	+			GOCC, TMHMM2.0	+			+				6
Q9NYP7	ELOV5_HUMAN	Elongation of very long chain fatty acids protein 5, EC 2.3.1.199 (3-keto acyl-CoA synthase ELOVL5) (ELOVL fatty acid elongase 5, ELOVL FA elongase 5) (Fatty acid elongase 1, hELO1) (Very long chain 3-ketoacyl-CoA synthase 5) (Very long chain 3-oxoacyl-CoA synthase 5)	ELOVL5 ELOVL2 PRO0530	+			GOCC, TMHMM2.0					+			6
P14209	CD99_HUMAN	CD99 antigen (12E7) (E2 antigen) (Protein MIC2) (T-cell surface glycoprotein E2) (CD antigen CD99)	CD99 MIC2 MIC2X MIC2Y	+			GOCC, TMHMM2.0	+							6
Q9BUB7	TMM70_HUMAN	Transmembrane protein 70, mitochondrial	TMEM70	+			GOCC, TMHMM2.0		+						6
Q8N357	S35F6_HUMAN	Solute carrier family 35 member F6 (ANT2-binding protein, ANT2BP) (Transport and Golgi organization 9 homolog)	SLC35F6 C2orf18 UNQ3047/PRO9863	+			GOCC, TMHMM2.0						+		6
Q86Y82	STX12_HUMAN	Syntaxin-12	STX12	+			GOCC, TMHMM2.0				+		+		6
Q10589	BST2_HUMAN	Bone marrow stromal antigen 2, BST-2 (HM1.24 antigen) (Tetherin) (CD antigen CD317)	BST2	+			GOCC, TMHMM2.0	+							6
P14406	CX7A2_HUMAN	Cytochrome c oxidase subunit 7A2, mitochondrial (Cytochrome c oxidase subunit VIIa-liver/heart, Cytochrome c oxidase subunit VIIa-L, Cytochrome c oxidase subunit VIIaL)	COX7A2 COX7AL	+			GOCC, TMHMM2.0		+						6
O43674	NDUB5_HUMAN	NADH dehydrogenase [ubiquinone] 1 beta subcomplex subunit 5, mitochondrial (Complex I-SGDH, CI-SGDH) (NADH-ubiquinone oxidoreductase SGDH subunit)	NDUFB5	+			GOCC, TMHMM2.0		+						6
Q8NEW0	ZNT7_HUMAN	Zinc transporter 7, ZnT-7 (Solute carrier family 30 member 7) (Znt-like transporter 2)	SLC30A7 ZNT7 ZNTL2	+			GOCC, TMHMM2.0							+	6
Q969M3	YIPF5_HUMAN	Protein YIPF5 (Five-pass transmembrane protein localizing in the Golgi apparatus and the endoplasmic reticulum 5) (Smooth muscle cell-associated protein 5, SMAP-5) (YIP1 family member 5) (YPT-interacting protein 1 A)	YIPF5 FINGER5 YIP1A PP12723 SB140 UNQ3123/PRO10275	+			GOCC, TMHMM2.0					+			6
P56199	ITA1_HUMAN	Integrin alpha-1 (CD49 antigen-like family member A) (Laminin and collagen receptor) (VLA-1) (CD antigen CD49a)	ITGA1	+			GOCC, TMHMM2.0	+							6
P53801	PTTG_HUMAN	Pituitary tumor-transforming gene 1 protein-interacting protein (Pituitary tumor-transforming gene protein-binding factor, PBF, PTTG-binding factor)	PTTG1IP C21orf1 C21orf3	+			GOCC, TMHMM2.0							+	6
P00414	COX3_HUMAN	Cytochrome c oxidase subunit 3, EC 7.1.1.9 (Cytochrome c oxidase polypeptide III)	MT-CO3 COIII COXIII MTCO3	+			GOCC, TMHMM2.0		+						6
Q86TM6	SYVN1_HUMAN	E3 ubiquitin-protein ligase synoviolin, EC 2.3.2.27 (RING-type E3 ubiquitin transferase synoviolin) (Synovial apoptosis inhibitor 1)	SYVN1 HRD1 KIAA1810	+			GOCC, TMHMM2.0					+			6
O95298	NDUC2_HUMAN	NADH dehydrogenase [ubiquinone] 1 subunit C2 (Complex I-B14.5b, CI-B14.5b) (Human lung cancer oncogene 1 protein, HLC-1) (NADH-ubiquinone oxidoreductase subunit B14.5b)	NDUFC2 HLC1	+			GOCC, TMHMM2.0	+	+						6
P30825	SL7A1_HUMAN	High affinity cationic amino acid transporter 1, CAT-1, CAT1 (Ecotropic retroviral leukemia receptor homolog) (Ecotropic retrovirus receptor homolog) (Solute carrier family 7 member 1) (System Y+ basic amino acid transporter)	SLC7A1 ATRC1 ERR REC1L	+			GOCC, TMHMM2.0	+							6
P30408	T4S1_HUMAN	Transmembrane 4 L6 family member 1 (Membrane component chromosome 3 surface marker 1) (Tumor-associated antigen L6)	TM4SF1 M3S1 TAAL6	+			GOCC, TMHMM2.0	+							6
Q08722	CD47_HUMAN	Leukocyte surface antigen CD47 (Antigenic surface determinant protein OA3) (Integrin-associated protein, IAP) (Protein MER6) (CD antigen CD47)	CD47 MER6	+			GOCC, TMHMM2.0	+							6
O60725	ICMT_HUMAN	Protein-S-isoprenylcysteine O-methyltransferase, EC 2.1.1.100 (Isoprenylcysteine carboxylmethyltransferase) (Prenylated protein carboxyl methyltransferase, PPMT) (Prenylcysteine carboxyl methyltransferase, pcCMT)	ICMT PCCMT	+			GOCC, TMHMM2.0					+			6
Q8WY22	BRI3B_HUMAN	BRI3-binding protein, I3-binding protein (Cervical cancer 1 proto-oncogene-binding protein KG19) (HCCRBP-1)	BRI3BP KG19	+			GOCC, TMHMM2.0		+						5
O14817	TSN4_HUMAN	Tetraspanin-4, Tspan-4 (Novel antigen 2, NAG-2) (Transmembrane 4 superfamily member 7)	TSPAN4 NAG2 TM4SF7	+			GOCC, TMHMM2.0	+							5
Q9Y6N1	COX11_HUMAN	Cytochrome c oxidase assembly protein COX11, mitochondrial	COX11	+			GOCC, TMHMM2.0		+						5
P39210	MPV17_HUMAN	Protein Mpv17	MPV17	+			GOCC, TMHMM2.0		+				+		5
Q9HBH5	RDH14_HUMAN	Retinol dehydrogenase 14, EC 1.1.1.300 (Alcohol dehydrogenase PAN2) (Short chain dehydrogenase/reductase family 7C member 4)	RDH14 PAN2 SDR7C4 UNQ529/PRO1072	+			GOCC, TMHMM2.0					+	+		5
Q9UBG0	MRC2_HUMAN	C-type mannose receptor 2 (C-type lectin domain family 13 member E) (Endocytic receptor 180) (Macrophage mannose receptor 2) (Urokinase-type plasminogen activator receptor-associated protein, UPAR-associated protein, Urokinase receptor-associated protein) (CD antigen CD280)	MRC2 CLEC13E ENDO180 KIAA0709 UPARAP	+			GOCC, TMHMM2.0							+	5
O00560	SDCB1_HUMAN	Syntenin-1 (Melanoma differentiation-associated protein 9, MDA-9) (Pro-TGF-alpha cytoplasmic domain-interacting protein 18, TACIP18) (Scaffold protein Pbp1) (Syndecan-binding protein 1)	SDCBP MDA9 SYCL	+			GOCC, TMHMM2.0	+		+		+			5
O43657	TSN6_HUMAN	Tetraspanin-6, Tspan-6 (A15 homolog) (Putative NF-kappa-B-activating protein 321) (T245 protein) (Tetraspanin TM4-D) (Transmembrane 4 superfamily member 6)	TSPAN6 TM4SF6 UNQ767/PRO1560	+			GOCC, TMHMM2.0	+							5
P15151	PVR_HUMAN	Poliovirus receptor (Nectin-like protein 5, NECL-5) (CD antigen CD155)	PVR PVS	+			GOCC, TMHMM2.0	+							5
Q9NRX5	SERC1_HUMAN	Serine incorporator 1 (Tumor differentially expressed protein 1-like) (Tumor differentially expressed protein 2)	SERINC1 KIAA1253 TDE1L TDE2 UNQ396/PRO732	+			GOCC, TMHMM2.0	+				+			5
Q9P0S3	ORML1_HUMAN	ORM1-like protein 1 (Adoplin-1)	ORMDL1 HSPC202	+			GOCC, TMHMM2.0					+			5
Q96FX8	PERP_HUMAN	p53 apoptosis effector related to PMP-22 (Keratinocyte-associated protein 1, KCP-1) (P53-induced protein PIGPC1) (Transmembrane protein THW)	PERP KCP1 KRTCAP1 PIGPC1 THW	+			GOCC, TMHMM2.0	+							5
Q6UW78	UQCC3_HUMAN	Ubiquinol-cytochrome-c reductase complex assembly factor 3 (Assembly factor CBP4 homolog)	UQCC3 C11orf83 UNQ655/PRO1286	+			GOCC, TMHMM2.0		+						5
O94766	B3GA3_HUMAN	Galactosylgalactosylxylosylprotein 3-beta-glucuronosyltransferase 3, EC 2.4.1.135 (Beta-1,3-glucuronyltransferase 3) (Glucuronosyltransferase I, GlcAT-I) (UDP-GlcUA:Gal beta-1,3-Gal-R glucuronyltransferase, GlcUAT-I)	B3GAT3	+			GOCC, TMHMM2.0				+				5
Q9NPF0	CD320_HUMAN	CD320 antigen (8D6 antigen) (FDC-signaling molecule 8D6, FDC-SM-8D6) (Transcobalamin receptor, TCblR) (CD antigen CD320)	CD320 8D6A UNQ198/PRO224	+			GOCC, TMHMM2.0	+					+		5
Q9NUM4	T106B_HUMAN	Transmembrane protein 106B	TMEM106B	+			GOCC, TMHMM2.0						+		5
Q9Y3E0	GOT1B_HUMAN	Vesicle transport protein GOT1B (Germ cell tumor 2) (Golgi transport 1 homolog B) (Putative NF-kappa-B-activating protein 470) (hGOT1a)	GOLT1B GCT2 GOT1A CGI-141 HDCMA39P UNQ432/PRO793	+			GOCC, TMHMM2.0				+				5
Q2PZI1	D19L1_HUMAN	Probable C-mannosyltransferase DPY19L1, EC 2.4.1.- (Dpy-19-like protein 1) (Protein dpy-19 homolog 1)	DPY19L1 GA0500 KIAA0877	+			GOCC, TMHMM2.0			+					5
Q13454	TUSC3_HUMAN	Tumor suppressor candidate 3 (Dolichyl-diphosphooligosaccharide--protein glycosyltransferase subunit TUSC3, Oligosaccharyl transferase subunit TUSC3) (Magnesium uptake/transporter TUSC3) (Protein N33)	TUSC3 N33	+			GOCC, TMHMM2.0	+				+			5
O95249	GOSR1_HUMAN	Golgi SNAP receptor complex member 1 (28 kDa Golgi SNARE protein) (28 kDa cis-Golgi SNARE p28, GOS-28)	GOSR1 GS28	+			GOCC, TMHMM2.0				+				5
P12074	CX6A1_HUMAN	Cytochrome c oxidase subunit 6A1, mitochondrial (Cytochrome c oxidase polypeptide VIa-liver) (Cytochrome c oxidase subunit VIA-liver, COX VIa-L)	COX6A1 COX6AL	+			GOCC, TMHMM2.0		+						5
O96011	PX11B_HUMAN	Peroxisomal membrane protein 11B (Peroxin-11B) (Peroxisomal biogenesis factor 11B) (Protein PEX11 homolog beta, PEX11-beta)	PEX11B	+			GOCC, TMHMM2.0						+		5
Q92667	AKAP1_HUMAN	A-kinase anchor protein 1, mitochondrial (A-kinase anchor protein 149 kDa, AKAP 149) (Dual specificity A-kinase-anchoring protein 1, D-AKAP-1) (Protein kinase A-anchoring protein 1, PRKA1) (Spermatid A-kinase anchor protein 84, S-AKAP84)	AKAP1 AKAP149 PRKA1	+			GOCC, TMHMM2.0		+						5
P51636	CAV2_HUMAN	Caveolin-2	CAV2	+			GOCC, TMHMM2.0	+			+				5
Q9BUN8	DERL1_HUMAN	Derlin-1 (Degradation in endoplasmic reticulum protein 1, DERtrin-1) (Der1-like protein 1)	DERL1 DER1 UNQ243/PRO276	+			GOCC, TMHMM2.0					+			5
Q5TGZ0	MIC10_HUMAN	MICOS complex subunit MIC10 (Mitochondrial inner membrane organizing system protein 1)	MICOS10 C1orf151 MIC10 MINOS1	+			GOCC, TMHMM2.0		+						5
Q9BUV8	RCAF1_HUMAN	Respirasome Complex Assembly Factor 1 (Rab5-interacting protein, RIP5)	RAB5IF C20orf24 RCAF1 PNAS-11	+			GOCC, TMHMM2.0							+	5
A8CG34	P121C_HUMAN	Nuclear envelope pore membrane protein POM 121C (Nuclear pore membrane protein 121-2, POM121-2) (Pore membrane protein of 121 kDa C)	POM121C	+			GOCC, TMHMM2.0			+		+			4
P43007	SATT_HUMAN	Neutral amino acid transporter A (Alanine/serine/cysteine/threonine transporter 1, ASCT-1) (Solute carrier family 1 member 4)	SLC1A4 ASCT1 SATT	+			GOCC, TMHMM2.0	+							4
Q9NRK6	ABCBA_HUMAN	ATP-binding cassette sub-family B member 10, mitochondrial (ABC-mitochondrial erythroid protein, ABC-me protein) (ATP-binding cassette transporter 10, ABC transporter 10 protein) (Mitochondrial ATP-binding cassette 2, M-ABC2)	ABCB10	+			GOCC, TMHMM2.0		+						4
Q9NUQ2	PLCE_HUMAN	1-acyl-sn-glycerol-3-phosphate acyltransferase epsilon, EC 2.3.1.51 (1-acylglycerol-3-phosphate O-acyltransferase 5, 1-AGP acyltransferase 5, 1-AGPAT 5) (Lysophosphatidic acid acyltransferase epsilon, LPAAT-epsilon)	AGPAT5	+			GOCC, TMHMM2.0		+	+		+			4
Q8IY17	PLPL6_HUMAN	Patatin-like phospholipase domain-containing protein 6, EC 3.1.1.5 (Neuropathy target esterase)	PNPLA6 NTE	+			GOCC, TMHMM2.0					+			4
Q8IV08	PLD3_HUMAN	5'-3' exonuclease PLD3, EC 3.1.16.1 (Choline phosphatase 3) (HindIII K4L homolog) (Hu-K4) (Phosphatidylcholine-hydrolyzing phospholipase D3) (Phospholipase D3, PLD 3)	PLD3	+			GOCC, TMHMM2.0				+	+	+		4
Q9UNL2	SSRG_HUMAN	Translocon-associated protein subunit gamma, TRAP-gamma (Signal sequence receptor subunit gamma, SSR-gamma)	SSR3 TRAPG	+			GOCC, TMHMM2.0					+			4
Q9Y3D6	FIS1_HUMAN	Mitochondrial fission 1 protein (FIS1 homolog, hFis1) (Tetratricopeptide repeat protein 11, TPR repeat protein 11)	FIS1 TTC11 CGI-135	+			GOCC, TMHMM2.0		+				+		4
O00180	KCNK1_HUMAN	Potassium channel subfamily K member 1 (Inward rectifying potassium channel protein TWIK-1) (Potassium channel K2P1) (Potassium channel KCNO1)	KCNK1 HOHO1 KCNO1 TWIK1	+			GOCC, TMHMM2.0	+							4
Q14728	MFS10_HUMAN	Major facilitator superfamily domain-containing protein 10 (Tetracycline transporter-like protein)	MFSD10 TETRAN	+			GOCC, TMHMM2.0			+			+		4
Q5SNT2	TM201_HUMAN	Transmembrane protein 201 (Spindle-associated membrane protein 1)	TMEM201 NET5 SAMP1	+			GOCC, TMHMM2.0			+					4
Q9BVG9	PTSS2_HUMAN	Phosphatidylserine synthase 2, PSS-2, PtdSer synthase 2, EC 2.7.8.29 (Serine-exchange enzyme II)	PTDSS2 PSS2	+			GOCC, TMHMM2.0					+			4
Q9P003	CNIH4_HUMAN	Protein cornichon homolog 4, CNIH-4 (Cornichon family AMPA receptor auxiliary protein 4)	CNIH4 HSPC163	+			GOCC, TMHMM2.0				+	+			4
Q9Y394	DHRS7_HUMAN	Dehydrogenase/reductase SDR family member 7, EC 1.1.1.- (Retinal short-chain dehydrogenase/reductase 4, retSDR4) (Short chain dehydrogenase/reductase family 34C member 1, Protein SDR34C1)	DHRS7 DHRS7A RETSDR4 SDR34C1 CGI-86 UNQ285/PRO3448	+			GOCC, TMHMM2.0					+			4
Q9BXS4	TMM59_HUMAN	Transmembrane protein 59 (Liver membrane-bound protein)	TMEM59 C1orf8 HSPC001 UNQ169/PRO195	+			GOCC, TMHMM2.0	+			+		+		4
Q7L311	ARMX2_HUMAN	Armadillo repeat-containing X-linked protein 2 (ARM protein lost in epithelial cancers on chromosome X 2, Protein ALEX2)	ARMCX2 ALEX2 KIAA0512	+			GOCC, TMHMM2.0		+						4
Q9H0V9	LMA2L_HUMAN	VIP36-like protein (Lectin mannose-binding 2-like, LMAN2-like protein)	LMAN2L VIPL PSEC0028 UNQ368/PRO704	+			GOCC, TMHMM2.0				+	+			4
Q9BVK8	TM147_HUMAN	Transmembrane protein 147 (Protein NIFIE 14)	TMEM147	+			GOCC, TMHMM2.0	+				+			4
Q6Y1H2	HACD2_HUMAN	Very-long-chain (3R)-3-hydroxyacyl-CoA dehydratase 2, EC 4.2.1.134 (3-hydroxyacyl-CoA dehydratase 2, HACD2) (Protein-tyrosine phosphatase-like member B)	HACD2 PTPLB	+			GOCC, TMHMM2.0					+			4
Q9Y241	HIG1A_HUMAN	HIG1 domain family member 1A, mitochondrial (Hypoxia-inducible gene 1 protein) (RCF1 homolog A, RCF1a)	HIGD1A HIG1 HSPC010	+			GOCC, TMHMM2.0		+						4
O15533	TPSN_HUMAN	Tapasin, TPN, TPSN (NGS-17) (TAP-associated protein) (TAP-binding protein)	TAPBP NGS17 TAPA	+			GOCC, TMHMM2.0				+	+	+		4
Q9H490	PIGU_HUMAN	Phosphatidylinositol glycan anchor biosynthesis class U protein (Cell division cycle protein 91-like 1, Protein CDC91-like 1) (GPI transamidase component PIG-U)	PIGU CDC91L1 PSEC0205 UNQ3055/PRO9875	+			GOCC, TMHMM2.0	+				+			4
P03897	NU3M_HUMAN	NADH-ubiquinone oxidoreductase chain 3, EC 7.1.1.2 (NADH dehydrogenase subunit 3)	MT-ND3 MTND3 NADH3 ND3	+			GOCC, TMHMM2.0		+						4
Q96GE9	DMAC1_HUMAN	Distal membrane-arm assembly complex protein 1 (Transmembrane protein 261)	DMAC1 C9orf123 TMEM261	+			GOCC, TMHMM2.0		+						4
Q92643	GPI8_HUMAN	GPI-anchor transamidase, GPI transamidase, EC 3.-.-.- (GPI8 homolog, hGPI8) (Phosphatidylinositol-glycan biosynthesis class K protein, PIG-K)	PIGK GPI8	+			GOCC, TMHMM2.0					+			4
Q5VW38	GP107_HUMAN	Protein GPR107 (Lung seven transmembrane receptor 1)	GPR107 KIAA1624 LUSTR1	+			GOCC, TMHMM2.0	+							4
Q04721	NOTC2_HUMAN	Neurogenic locus notch homolog protein 2, Notch 2, hN2 [Cleaved into: Notch 2 extracellular truncation, N2ECD; Notch 2 intracellular domain, N2ICD ]	NOTCH2	+			GOCC, TMHMM2.0	+			+	+			3
Q8N2U0	TM256_HUMAN	Transmembrane protein 256	TMEM256 C17orf61	+			GOCC, TMHMM2.0							+	3
Q9BRQ8	FSP1_HUMAN	Ferroptosis suppressor protein 1, FSP1, EC 1.6.5.- (Apoptosis-inducing factor homologous mitochondrion-associated inducer of death, AMID) (p53-responsive gene 3 protein)	AIFM2 AMID PRG3	+			GOCC, TMHMM2.0	+	+						3
Q01629	IFM2_HUMAN	Interferon-induced transmembrane protein 2 (Dispanin subfamily A member 2c, DSPA2c) (Interferon-inducible protein 1-8D)	IFITM2	+			GOCC, TMHMM2.0	+					+		3
Q9Y2C4	EXOG_HUMAN	Nuclease EXOG, mitochondrial, EC 3.1.30.- (Endonuclease G-like 1, Endo G-like 1)	EXOG ENDOGL1 ENDOGL2 ENGL	+			GOCC, TMHMM2.0		+						3
Q7Z7N9	T179B_HUMAN	Transmembrane protein 179B	TMEM179B	+			GOCC, TMHMM2.0	+							3
O95674	CDS2_HUMAN	Phosphatidate cytidylyltransferase 2, EC 2.7.7.41 (CDP-DAG synthase 2) (CDP-DG synthase 2) (CDP-diacylglycerol synthase 2, CDS 2) (CDP-diglyceride pyrophosphorylase 2) (CDP-diglyceride synthase 2) (CTP:phosphatidate cytidylyltransferase 2)	CDS2	+			GOCC, TMHMM2.0		+			+			3
Q5BJD5	TM41B_HUMAN	Transmembrane protein 41B (Protein stasimon)	TMEM41B KIAA0033	+			GOCC, TMHMM2.0					+			3
Q7L5N7	PCAT2_HUMAN	Lysophosphatidylcholine acyltransferase 2, LPC acyltransferase 2, LPCAT-2, LysoPC acyltransferase 2, EC 2.3.1.23 (1-acylglycerol-3-phosphate O-acyltransferase 11, 1-AGP acyltransferase 11, 1-AGPAT 11, EC 2.3.1.51) (1-acylglycerophosphocholine O-acyltransferase) (1-alkenylglycerophosphocholine O-acyltransferase, EC 2.3.1.25) (1-alkylglycerophosphocholine O-acetyltransferase, EC 2.3.1.67) (Acetyl-C…	LPCAT2 AGPAT11 AYTL1	+			GOCC, TMHMM2.0	+			+	+			3
O95214	LERL1_HUMAN	Leptin receptor overlapping transcript-like 1 (Endospanin-2)	LEPROTL1 My047 UNQ577/PRO1139	+			GOCC, TMHMM2.0							+	3
O95870	ABHGA_HUMAN	Phosphatidylserine lipase ABHD16A, EC 3.1.-.- (Alpha/beta hydrolase domain-containing protein 16A, Abhydrolase domain-containing protein 16A) (HLA-B-associated transcript 5, hBAT5) (Monoacylglycerol lipase ABHD16A, EC 3.1.1.23) (Protein G5)	ABHD16A BAT5 G5 NG26 PP199	+			GOCC, TMHMM2.0							+	3
Q13586	STIM1_HUMAN	Stromal interaction molecule 1	STIM1 GOK	+			GOCC, TMHMM2.0	+				+			3
P11117	PPAL_HUMAN	Lysosomal acid phosphatase, LAP, EC 3.1.3.2	ACP2	+			GOCC, TMHMM2.0						+		3
Q9C0E8	LNP_HUMAN	Endoplasmic reticulum junction formation protein lunapark (ER junction formation factor lunapark)	LNPK KIAA1715 LNP	+			GOCC, TMHMM2.0					+			3
Q86YN1	DOPP1_HUMAN	Dolichyldiphosphatase 1, EC 3.6.1.43 (Dolichyl pyrophosphate phosphatase 1)	DOLPP1 LSFR2	+			GOCC, TMHMM2.0					+			3
Q9NWW5	CLN6_HUMAN	Ceroid-lipofuscinosis neuronal protein 6, Protein CLN6	CLN6	+			GOCC, TMHMM2.0					+			3
Q9BVK2	ALG8_HUMAN	Probable dolichyl pyrophosphate Glc1Man9GlcNAc2 alpha-1,3-glucosyltransferase, EC 2.4.1.265 (Asparagine-linked glycosylation protein 8 homolog) (Dol-P-Glc:Glc(1)Man(9)GlcNAc(2)-PP-dolichyl alpha-1,3-glucosyltransferase) (Dolichyl-P-Glc:Glc1Man9GlcNAc2-PP-dolichyl glucosyltransferase)	ALG8 HUSSY-02	+			GOCC, TMHMM2.0					+			3
Q6NXT4	ZNT6_HUMAN	Zinc transporter 6, ZnT-6 (Solute carrier family 30 member 6)	SLC30A6 ZNT6	+			GOCC, TMHMM2.0				+				3
O94919	ENDD1_HUMAN	Endonuclease domain-containing 1 protein, EC 3.1.30.-	ENDOD1 KIAA0830	+			GOCC, TMHMM2.0							+	3
O95807	TM50A_HUMAN	Transmembrane protein 50A (Small membrane protein 1)	TMEM50A SMP1 UNQ386/PRO718	+			GOCC, TMHMM2.0							+	3
Q6IAN0	DRS7B_HUMAN	Dehydrogenase/reductase SDR family member 7B, EC 1.1.-.- (Short-chain dehydrogenase/reductase family 32C member 1, Protein SDR32C1)	DHRS7B SDR32C1 CGI-93 UNQ212/PRO238	+			GOCC, TMHMM2.0					+	+		3
P03923	NU6M_HUMAN	NADH-ubiquinone oxidoreductase chain 6, EC 7.1.1.2 (NADH dehydrogenase subunit 6)	MT-ND6 MTND6 NADH6 ND6	+			GOCC, TMHMM2.0		+						3
Q9BZF1	OSBL8_HUMAN	Oxysterol-binding protein-related protein 8, ORP-8, OSBP-related protein 8	OSBPL8 KIAA1451 ORP8 OSBP10	+			GOCC, TMHMM2.0			+		+			3
Q8NHH9	ATLA2_HUMAN	Atlastin-2, EC 3.6.5.- (ADP-ribosylation factor-like protein 6-interacting protein 2, ARL-6-interacting protein 2, Aip-2)	ATL2 ARL6IP2	+			GOCC, TMHMM2.0					+			3
Q6NTF9	RHBD2_HUMAN	Rhomboid domain-containing protein 2	RHBDD2 RHBDL7	+			GOCC, TMHMM2.0				+	+			3
Q9NRP0	OSTC_HUMAN	Oligosaccharyltransferase complex subunit OSTC (Hydrophobic protein HSF-28)	OSTC DC2 HDCMD45P HSPC307	+			GOCC, TMHMM2.0					+			3
O15243	OBRG_HUMAN	Leptin receptor gene-related protein (Endospanin-1) (Leptin receptor overlapping transcript protein) (OB-R gene-related protein, OB-RGRP)	LEPROT LEPR OBR	+			GOCC, TMHMM2.0				+		+		3
A5PLL7	PDES1_HUMAN	Plasmanylethanolamine desaturase, EC 1.14.19.77 (Plasmanylethanolamine desaturase 1) (Transmembrane protein 189)	PEDS1 KUA PDES TMEM189	+			GOCC, TMHMM2.0					+			3
Q8IUX1	T126B_HUMAN	Complex I assembly factor TMEM126B, mitochondrial (Transmembrane protein 126B)	TMEM126B HT007	+			GOCC, TMHMM2.0		+						3
Q6ZRP7	QSOX2_HUMAN	Sulfhydryl oxidase 2, EC 1.8.3.2 (Neuroblastoma-derived sulfhydryl oxidase) (Quiescin Q6-like protein 1)	QSOX2 QSCN6L1 SOXN	+			GOCC, TMHMM2.0	+		+	+				3
Q9H0X4	F234A_HUMAN	Protein FAM234A (Protein ITFG3)	FAM234A C16orf9 ITFG3	+			GOCC, TMHMM2.0	+							3
O95832	CLD1_HUMAN	Claudin-1 (Senescence-associated epithelial membrane protein)	CLDN1 CLD1 SEMP1 UNQ481/PRO944	+			GOCC, TMHMM2.0	+							3
O15118	NPC1_HUMAN	NPC intracellular cholesterol transporter 1 (Niemann-Pick C1 protein)	NPC1	+			GOCC, TMHMM2.0	+		+			+		3
Q96L58	B3GT6_HUMAN	Beta-1,3-galactosyltransferase 6, Beta-1,3-GalTase 6, Beta3Gal-T6, Beta3GalT6, EC 2.4.1.134 (GAG GalTII) (Galactosyltransferase II) (Galactosylxylosylprotein 3-beta-galactosyltransferase) (UDP-Gal:betaGal beta 1,3-galactosyltransferase polypeptide 6)	B3GALT6	+			GOCC, TMHMM2.0				+				3
Q6NUM9	RETST_HUMAN	All-trans-retinol 13,14-reductase, EC 1.3.99.23 (All-trans-13,14-dihydroretinol saturase, RetSat) (PPAR-alpha-regulated and starvation-induced gene protein)	RETSAT PPSIG UNQ439/PRO872	+			GOCC, TMHMM2.0			+		+			3
Q96J84	KIRR1_HUMAN	Kin of IRRE-like protein 1 (Kin of irregular chiasm-like protein 1) (Nephrin-like protein 1)	KIRREL1 KIRREL NEPH1	+			GOCC, TMHMM2.0	+							3
Q8N6S5	AR6P6_HUMAN	ADP-ribosylation factor-like protein 6-interacting protein 6, ARL-6-interacting protein 6, Aip-6 (Phosphonoformate immuno-associated protein 1)	ARL6IP6 PFAAP1	+			GOCC, TMHMM2.0			+					3
Q9Y6D0	SELK_HUMAN	Selenoprotein K, SelK	SELENOK SELK HSPC030 HSPC297	+			GOCC, TMHMM2.0	+				+			3
Q8WUY8	NAT14_HUMAN	Probable N-acetyltransferase 14, EC 2.3.1.- (K562 cell-derived leucine-zipper-like protein 1)	NAT14 KLP1	+			GOCC, TMHMM2.0							+	3
Q9BVT8	TMUB1_HUMAN	Transmembrane and ubiquitin-like domain-containing protein 1 (Dendritic cell-derived ubiquitin-like protein, DULP) (Hepatocyte odd protein shuttling protein) (Ubiquitin-like protein SB144) [Cleaved into: iHOPS ]	TMUB1 C7orf21 DULP HOPS SB144 UNQ763/PRO1555	+			GOCC, TMHMM2.0							+	3
O60830	TI17B_HUMAN	Mitochondrial import inner membrane translocase subunit Tim17-B	TIMM17B TIM17B JM3	+			GOCC, TMHMM2.0		+						3
Q8WVI0	SMIM4_HUMAN	Small integral membrane protein 4	SMIM4 C3orf78	+			GOCC, TMHMM2.0							+	3
Q12846	STX4_HUMAN	Syntaxin-4 (Renal carcinoma antigen NY-REN-31)	STX4 STX4A	+			GOCC, TMHMM2.0	+					+		3
Q9NV96	CC50A_HUMAN	Cell cycle control protein 50A (P4-ATPase flippase complex beta subunit TMEM30A) (Transmembrane protein 30A)	TMEM30A C6orf67 CDC50A	+			GOCC, TMHMM2.0	+					+		3
Q14118	DAG1_HUMAN	Dystroglycan 1 (Dystroglycan) (Dystrophin-associated glycoprotein 1) [Cleaved into: Alpha-dystroglycan, Alpha-DG; Beta-dystroglycan, Beta-DG ]	DAG1	+			GOCC, TMHMM2.0	+							3
Q9UPY5	XCT_HUMAN	Cystine/glutamate transporter (Amino acid transport system xc-) (Calcium channel blocker resistance protein CCBR1) (Solute carrier family 7 member 11) (xCT)	SLC7A11	+			GOCC, TMHMM2.0	+							3
Q53TN4	CYBR1_HUMAN	Plasma membrane ascorbate-dependent reductase CYBRD1, EC 7.2.1.3 (Cytochrome b reductase 1) (Duodenal cytochrome b) (Ferric-chelate reductase 3)	CYBRD1 DCYTB FRRS3	+			GOCC, TMHMM2.0	+					+		3
Q68DH5	LMBD2_HUMAN	G-protein coupled receptor-associated protein LMBRD2 (LMBR1 domain-containing protein 2)	LMBRD2	+			GOCC, TMHMM2.0	+							3
Q8WVX9	FACR1_HUMAN	Fatty acyl-CoA reductase 1, EC 1.2.1.84 (Male sterility domain-containing protein 2)	FAR1 MLSTD2 UNQ2423/PRO4981	+			GOCC, TMHMM2.0						+		3
Q92685	ALG3_HUMAN	Dol-P-Man:Man(5)GlcNAc(2)-PP-Dol alpha-1,3-mannosyltransferase, EC 2.4.1.258 (Asparagine-linked glycosylation protein 3 homolog) (Dol-P-Man-dependent alpha(1-3)-mannosyltransferase) (Dolichyl-P-Man:Man(5)GlcNAc(2)-PP-dolichyl mannosyltransferase) (Dolichyl-phosphate-mannose--glycolipid alpha-mannosyltransferase) (Not56-like protein)	ALG3 NOT NOT56L	+			GOCC, TMHMM2.0					+			3
Q8WUX1	S38A5_HUMAN	Sodium-coupled neutral amino acid transporter 5 (Solute carrier family 38 member 5) (System N transporter 2)	SLC38A5 JM24 SN2 SNAT5 PP7194	+			GOCC, TMHMM2.0	+							3
Q8WTV0	SCRB1_HUMAN	Scavenger receptor class B member 1, SRB1 (CD36 and LIMPII analogous 1, CLA-1) (CD36 antigen-like 1) (Collagen type I receptor, thrombospondin receptor-like 1) (SR-BI) (CD antigen CD36)	SCARB1 CD36L1 CLA1	+			GOCC, TMHMM2.0	+					+		3
Q6UX71	PXDC2_HUMAN	Plexin domain-containing protein 2 (Tumor endothelial marker 7-related protein)	PLXDC2 TEM7R UNQ2514/PRO6003	+			GOCC, TMHMM2.0							+	3
P51809	VAMP7_HUMAN	Vesicle-associated membrane protein 7, VAMP-7 (Synaptobrevin-like protein 1) (Tetanus-insensitive VAMP, Ti-VAMP)	VAMP7 SYBL1	+			GOCC, TMHMM2.0	+				+	+		3
Q8TBQ9	KISHA_HUMAN	Protein kish-A (Transmembrane protein 167) (Transmembrane protein 167A)	TMEM167A TMEM167	+			GOCC, TMHMM2.0				+				3
Q9NX62	IMPA3_HUMAN	Golgi-resident adenosine 3',5'-bisphosphate 3'-phosphatase, Golgi-resident PAP phosphatase, gPAPP, EC 3.1.3.7 (3'(2'), 5'-bisphosphate nucleotidase 2) (Inositol monophosphatase domain-containing protein 1) (Myo-inositol monophosphatase A3) (Phosphoadenosine phosphate 3'-nucleotidase)	BPNT2 IMPA3 IMPAD1	+			GOCC, TMHMM2.0							+	3
Q9NY26	S39A1_HUMAN	Zinc transporter ZIP1 (Solute carrier family 39 member 1) (Zinc-iron-regulated transporter-like) (Zrt- and Irt-like protein 1, ZIP-1, hZIP1)	SLC39A1 IRT1 ZIP1 ZIRTL CGI-08 CGI-71	+			GOCC, TMHMM2.0	+				+			3
Q8NBJ4	GOLM1_HUMAN	Golgi membrane protein 1 (Golgi membrane protein GP73) (Golgi phosphoprotein 2)	GOLM1 C9orf155 GOLPH2 PSEC0242 UNQ686/PRO1326	+			GOCC, TMHMM2.0	+							3
Q5T8D3	ACBD5_HUMAN	Acyl-CoA-binding domain-containing protein 5	ACBD5 KIAA1996	+			GOCC, TMHMM2.0						+		3
P60059	SC61G_HUMAN	Protein transport protein Sec61 subunit gamma	SEC61G	+			GOCC, TMHMM2.0							+	3
O15155	BET1_HUMAN	BET1 homolog, hBET1 (Golgi vesicular membrane-trafficking protein p18)	BET1	+			GOCC, TMHMM2.0				+	+			3
P61165	TM258_HUMAN	Transmembrane protein 258 (Dolichyl-diphosphooligosaccharide--protein glycosyltransferase subunit TMEM258, Oligosaccharyl transferase subunit TMEM258)	TMEM258 C11orf10 HSPC005	+			GOCC, TMHMM2.0					+			3
Q9NXW2	DJB12_HUMAN	DnaJ homolog subfamily B member 12	DNAJB12	+			GOCC, TMHMM2.0			+		+			3
Q9GZM5	YIPF3_HUMAN	Protein YIPF3 (Killer lineage protein 1) (Natural killer cell-specific antigen KLIP1) (YIP1 family member 3) [Cleaved into: Protein YIPF3, 36 kDa form III ]	YIPF3 C6orf109 KLIP1	+			GOCC, TMHMM2.0	+							3
Q12893	TM115_HUMAN	Transmembrane protein 115 (Placental protein 6) (Protein PL6)	TMEM115 PL6 LUCA11.2	+			GOCC, TMHMM2.0				+				3
P03891	NU2M_HUMAN	NADH-ubiquinone oxidoreductase chain 2, EC 7.1.1.2 (NADH dehydrogenase subunit 2)	MT-ND2 MTND2 NADH2 ND2	+			GOCC, TMHMM2.0		+						3
Q92482	AQP3_HUMAN	Aquaporin-3, AQP-3 (Aquaglyceroporin-3)	AQP3	+			GOCC, TMHMM2.0	+							3
Q969E2	SCAM4_HUMAN	Secretory carrier-associated membrane protein 4, Secretory carrier membrane protein 4	SCAMP4	+			GOCC, TMHMM2.0						+		3
P27449	VATL_HUMAN	V-type proton ATPase 16 kDa proteolipid subunit c, V-ATPase 16 kDa proteolipid subunit c (Vacuolar proton pump 16 kDa proteolipid subunit c)	ATP6V0C ATP6C ATP6L ATPL	+			GOCC, TMHMM2.0	+			+		+		3
Q9BZM5	ULBP2_HUMAN	UL16-binding protein 2 (ALCAN-alpha) (NKG2D ligand 2, N2DL-2, NKG2DL2) (Retinoic acid early transcript 1H)	ULBP2 N2DL2 RAET1H UNQ463/PRO791	+			GOCC, TMHMM2.0	+							3
O60637	TSN3_HUMAN	Tetraspanin-3, Tspan-3 (Tetraspanin TM4-A) (Transmembrane 4 superfamily member 8)	TSPAN3 TM4SF8	+			GOCC, TMHMM2.0	+							3
Q9BW72	HIG2A_HUMAN	HIG1 domain family member 2A, mitochondrial (RCF1 homolog B, RCF1b)	HIGD2A	+			GOCC, TMHMM2.0		+						3
O95159	ZFPL1_HUMAN	Zinc finger protein-like 1 (Zinc finger protein MCG4)	ZFPL1	+			GOCC, TMHMM2.0							+	3
O60669	MOT2_HUMAN	Monocarboxylate transporter 2, MCT 2 (Solute carrier family 16 member 7)	SLC16A7 MCT2	+			GOCC, TMHMM2.0	+							3
O43826	G6PT1_HUMAN	Glucose-6-phosphate exchanger SLC37A4 (Glucose-5-phosphate transporter) (Glucose-6-phosphate translocase) (Solute carrier family 37 member 4) (Transformation-related gene 19 protein, TRG-19)	SLC37A4 G6PT G6PT1 PRO0685 TRG19	+			GOCC, TMHMM2.0					+			3
O76095	JTB_HUMAN	Protein JTB (Jumping translocation breakpoint protein) (Prostate androgen-regulated protein, PAR protein)	JTB HSPC222	+			GOCC, TMHMM2.0	+							3
Q5BJF2	SGMR2_HUMAN	Sigma intracellular receptor 2, Sigma-2 receptor, Sigma2 receptor (Meningioma-associated protein 30) (Transmembrane protein 97)	TMEM97 MAC30 S2R	+			GOCC, TMHMM2.0	+		+		+			3
O43462	MBTP2_HUMAN	Membrane-bound transcription factor site-2 protease, EC 3.4.24.85 (Endopeptidase S2P) (Sterol regulatory element-binding proteins intramembrane protease, SREBPs intramembrane protease)	MBTPS2 S2P	+			GOCC, TMHMM2.0				+				3
P56378	ATP68_HUMAN	ATP synthase subunit ATP5MJ, mitochondrial (6.8 kDa mitochondrial proteolipid protein, MLQ) (ATP synthase membrane subunit 6.8PL)	ATP5MJ ATP5MPL C14orf2 MP68 PRO1574	+			GOCC, TMHMM2.0		+						3
Q96A29	FUCT1_HUMAN	GDP-fucose transporter 1 (Solute carrier family 35 member C1)	SLC35C1 FUCT1	+			GOCC, TMHMM2.0				+				3
P14210	HGF_HUMAN	Hepatocyte growth factor (Hepatopoietin-A) (Scatter factor, SF) [Cleaved into: Hepatocyte growth factor alpha chain; Hepatocyte growth factor beta chain ]	HGF HPTA	+			GOCC, TMHMM2.0							+	3
Q9BTX3	TM208_HUMAN	Transmembrane protein 208	TMEM208 HSPC171	+			GOCC, TMHMM2.0					+			3
Q96ND0	F210A_HUMAN	Protein FAM210A	FAM210A C18orf19	+			GOCC, TMHMM2.0							+	3
O15126	SCAM1_HUMAN	Secretory carrier-associated membrane protein 1, Secretory carrier membrane protein 1	SCAMP1 SCAMP	+			GOCC, TMHMM2.0	+					+		2
B7ZAQ6	GPHRA_HUMAN	Golgi pH regulator A (Protein GPR89A) (Putative MAPK-activating protein PM01) (Putative NF-kappa-B-activating protein 90)	GPR89A GPHRA GPR89 SH120 CGI-13 UNQ192/PRO218	+			GOCC, TMHMM2.0				+		+		2
Q8NBM4	UBAC2_HUMAN	Ubiquitin-associated domain-containing protein 2, UBA domain-containing protein 2 (Phosphoglycerate dehydrogenase-like protein 1)	UBAC2 PHGDHL1 PSEC0110	+			GOCC, TMHMM2.0					+			2
O15127	SCAM2_HUMAN	Secretory carrier-associated membrane protein 2, Secretory carrier membrane protein 2	SCAMP2	+			GOCC, TMHMM2.0						+		2
P55011	S12A2_HUMAN	Solute carrier family 12 member 2 (Basolateral Na-K-Cl symporter) (Bumetanide-sensitive sodium-(potassium)-chloride cotransporter 2)	SLC12A2 NKCC1	+			GOCC, TMHMM2.0	+					+		2
Q9UNN8	EPCR_HUMAN	Endothelial protein C receptor (Activated protein C receptor, APC receptor) (Endothelial cell protein C receptor) (CD antigen CD201)	PROCR EPCR	+			GOCC, TMHMM2.0	+							2
O14569	C56D2_HUMAN	Transmembrane reductase CYB561D2, EC 7.2.1.3 (Cytochrome b561 domain-containing protein 2) (Putative tumor suppressor protein 101F6)	CYB561D2 101F6 LUCA12.2	+			GOCC, TMHMM2.0					+	+		2
Q8N2K0	ABD12_HUMAN	Lysophosphatidylserine lipase ABHD12, EC 3.1.-.- (2-arachidonoylglycerol hydrolase ABHD12) (Abhydrolase domain-containing protein 12, hABHD12) (Monoacylglycerol lipase ABHD12, EC 3.1.1.23) (Oxidized phosphatidylserine lipase ABHD12, EC 3.1.-.-)	ABHD12 C20orf22	+			GOCC, TMHMM2.0	+				+			2
O60499	STX10_HUMAN	Syntaxin-10, Syn10	STX10 SYN10	+			GOCC, TMHMM2.0				+		+		2
Q5SWX8	ODR4_HUMAN	Protein odr-4 homolog, hODR-4 (LAG1-interacting protein) (Transactivated by transforming growth factor beta protein 1)	ODR4 C1orf27 TTG1 TTG1A	+			GOCC, TMHMM2.0							+	2
Q9NZC3	GDE1_HUMAN	Glycerophosphodiester phosphodiesterase 1 (Glycerophosphoinositol glycerophosphodiesterase GDE1, EC 3.1.4.44) (Lysophospholipase D GDE1, EC 3.1.4.-) (Membrane-interacting protein of RGS16) (RGS16-interacting membrane protein)	GDE1 MIR16	+			GOCC, TMHMM2.0	+					+		2
Q9BW60	ELOV1_HUMAN	Elongation of very long chain fatty acids protein 1, EC 2.3.1.199 (3-keto acyl-CoA synthase ELOVL1) (ELOVL fatty acid elongase 1, ELOVL FA elongase 1) (Very long chain 3-ketoacyl-CoA synthase 1) (Very long chain 3-oxoacyl-CoA synthase 1)	ELOVL1 SSC1 CGI-88	+			GOCC, TMHMM2.0					+			2
Q969X1	LFG3_HUMAN	Protein lifeguard 3 (Protein RECS1 homolog) (Transmembrane BAX inhibitor motif-containing protein 1)	TMBIM1 LFG3 RECS1 PP1201 PSEC0158	+			GOCC, TMHMM2.0	+					+		2
Q86V85	GP180_HUMAN	Integral membrane protein GPR180 (Intimal thickness-related receptor)	GPR180 ITR	+			GOCC, TMHMM2.0							+	2
Q07812	BAX_HUMAN	Apoptosis regulator BAX (Bcl-2-like protein 4, Bcl2-L-4)	BAX BCL2L4	+			GOCC, TMHMM2.0		+	+		+			2
Q9NZ43	USE1_HUMAN	Vesicle transport protein USE1 (Putative MAPK-activating protein PM26) (USE1-like protein) (p31)	USE1 USE1L MDS032	+			GOCC, TMHMM2.0					+			2
Q8NBW4	S38A9_HUMAN	Sodium-coupled neutral amino acid transporter 9 (Solute carrier family 38 member 9) (Up-regulated in lung cancer 11)	SLC38A9 URLC11	+			GOCC, TMHMM2.0						+		2
Q9Y3Q3	TMED3_HUMAN	Transmembrane emp24 domain-containing protein 3 (Membrane protein p24B) (p24 family protein gamma-4, p24gamma4) (p26)	TMED3 C15orf22 UNQ5357/PRO1078	+			GOCC, TMHMM2.0				+	+			2
Q9Y6I9	TX264_HUMAN	Testis-expressed protein 264 (Putative secreted protein Zsig11)	TEX264 ZSIG11 UNQ337/PRO536	+			GOCC, TMHMM2.0					+			2
Q86T03	PP4P1_HUMAN	Type 1 phosphatidylinositol 4,5-bisphosphate 4-phosphatase, Type 1 PtdIns-4,5-P2 4-Ptase, EC 3.1.3.78 (PtdIns-4,5-P2 4-Ptase I) (Transmembrane protein 55B)	PIP4P1 C14orf9 TMEM55B	+			GOCC, TMHMM2.0	+					+		2
Q9C0D9	EPT1_HUMAN	Ethanolaminephosphotransferase 1, hEPT1, EC 2.7.8.1 (Selenoprotein I, SelI)	SELENOI EPT1 KIAA1724 SELI	+			GOCC, TMHMM2.0					+			2
Q9UP95	S12A4_HUMAN	Solute carrier family 12 member 4 (Electroneutral potassium-chloride cotransporter 1) (Erythroid K-Cl cotransporter 1, hKCC1)	SLC12A4 KCC1	+			GOCC, TMHMM2.0	+					+		2
O14662	STX16_HUMAN	Syntaxin-16, Syn16	STX16	+			GOCC, TMHMM2.0				+		+		2
O14957	QCR10_HUMAN	Cytochrome b-c1 complex subunit 10 (Complex III subunit 10) (Complex III subunit XI) (Ubiquinol-cytochrome c reductase complex 6.4 kDa protein)	UQCR11 UQCR	+			GOCC, TMHMM2.0		+						2
Q9ULQ1	TPC1_HUMAN	Two pore channel protein 1 (Two pore calcium channel protein 1) (Voltage-dependent calcium channel protein TPC1)	TPCN1 KIAA1169 TPC1	+			GOCC, TMHMM2.0						+		2
Q16880	CGT_HUMAN	2-hydroxyacylsphingosine 1-beta-galactosyltransferase, EC 2.4.1.47 (Ceramide UDP-galactosyltransferase) (Cerebroside synthase) (UDP-galactose-ceramide galactosyltransferase)	UGT8 CGT UGT4	+			GOCC, TMHMM2.0	+							2
Q8WVX3	CD003_HUMAN	Uncharacterized protein C4orf3 (Hepatitis C virus F protein-transactivated protein 1, HCV F-transactivated protein 1)	C4orf3	+			GOCC, TMHMM2.0					+			2
P51798	CLCN7_HUMAN	H(+)/Cl(-) exchange transporter 7 (Chloride channel 7 alpha subunit) (Chloride channel protein 7, ClC-7)	CLCN7	+			GOCC, TMHMM2.0						+		2
Q9BSR8	YIPF4_HUMAN	Protein YIPF4 (YIP1 family member 4)	YIPF4 Nbla11189	+			GOCC, TMHMM2.0	+							2
P78382	S35A1_HUMAN	CMP-sialic acid transporter, CMP-SA-Tr, CMP-Sia-Tr (Solute carrier family 35 member A1)	SLC35A1	+			GOCC, TMHMM2.0	+			+				2
Q9H3Z4	DNJC5_HUMAN	DnaJ homolog subfamily C member 5 (Ceroid-lipofuscinosis neuronal protein 4) (Cysteine string protein, CSP)	DNAJC5 CLN4	+			GOCC, TMHMM2.0	+					+		2
Q9UQ90	SPG7_HUMAN	Paraplegin, EC 3.4.24.- (Cell matrix adhesion regulator) (Spastic paraplegia 7 protein)	SPG7 CAR CMAR PGN	+			GOCC, TMHMM2.0		+						2
Q9UHQ4	BAP29_HUMAN	B-cell receptor-associated protein 29, BCR-associated protein 29, Bap29	BCAP29 BAP29	+			GOCC, TMHMM2.0					+			2
Q15012	LAP4A_HUMAN	Lysosomal-associated transmembrane protein 4A (Golgi 4-transmembrane-spanning transporter MTP)	LAPTM4A KIAA0108 LAPTM4 MBNT MTRP UNQ1846/PRO3574	+			GOCC, TMHMM2.0						+		2
Q9NP84	TNR12_HUMAN	Tumor necrosis factor receptor superfamily member 12A (Fibroblast growth factor-inducible immediate-early response protein 14, FGF-inducible 14) (Tweak-receptor, TweakR) (CD antigen CD266)	TNFRSF12A FN14	+			GOCC, TMHMM2.0	+							2
P78536	ADA17_HUMAN	Disintegrin and metalloproteinase domain-containing protein 17, ADAM 17, EC 3.4.24.86 (Snake venom-like protease) (TNF-alpha convertase) (TNF-alpha-converting enzyme) (CD antigen CD156b)	ADAM17 CSVP TACE	+			GOCC, TMHMM2.0	+			+				2
Q9H4I9	EMRE_HUMAN	Essential MCU regulator, mitochondrial (Single-pass membrane protein with aspartate-rich tail 1, mitochondrial)	SMDT1 C22orf32 EMRE	+			GOCC, TMHMM2.0		+						2
Q8WXI7	MUC16_HUMAN	Mucin-16, MUC-16 (Ovarian cancer-related tumor marker CA125, CA-125) (Ovarian carcinoma antigen CA125)	MUC16 CA125	+			GOCC, TMHMM2.0	+							2
Q86WC4	OSTM1_HUMAN	Osteopetrosis-associated transmembrane protein 1 (Chloride channel 7 beta subunit)	OSTM1 GL HSPC019 UNQ6098/PRO21201	+			GOCC, TMHMM2.0						+		2
Q8NBI5	S43A3_HUMAN	Equilibrative nucleobase transporter 1 (Protein FOAP-13) (Solute carrier family 43 member 3)	SLC43A3 ENBT1 PSEC0252	+			GOCC, TMHMM2.0	+							2
O14684	PTGES_HUMAN	Prostaglandin E synthase, EC 5.3.99.3 (Glutathione peroxidase PTGES, EC 1.11.1.-) (Glutathione transferase PTGES, EC 2.5.1.18) (Microsomal glutathione S-transferase 1-like 1, MGST1-L1) (Microsomal prostaglandin E synthase 1, MPGES-1) (p53-induced gene 12 protein)	PTGES MGST1L1 MPGES1 PGES PIG12	+			GOCC, TMHMM2.0			+		+			2
O43808	PM34_HUMAN	Peroxisomal membrane protein PMP34 (34 kDa peroxisomal membrane protein) (Solute carrier family 25 member 17)	SLC25A17 PMP34	+			GOCC, TMHMM2.0						+		2
Q86X29	LSR_HUMAN	Lipolysis-stimulated lipoprotein receptor (Angulin-1)	LSR ILDR3 LISCH	+			GOCC, TMHMM2.0	+							2
P60903	S10AA_HUMAN	Protein S100-A10 (Calpactin I light chain) (Calpactin-1 light chain) (Cellular ligand of annexin II) (S100 calcium-binding protein A10) (p10 protein) (p11)	S100A10 ANX2LG CAL1L CLP11	+			GOCC, TMHMM2.0	+							2
P80303	NUCB2_HUMAN	Nucleobindin-2 (DNA-binding protein NEFA) (Epididymis secretory protein Li 109) (Gastric cancer antigen Zg4) (Prepronesfatin) [Cleaved into: Nesfatin-1 ]	NUCB2 NEFA	+			GOCC, TMHMM2.0	+		+	+	+			2
Q12912	IRAG2_HUMAN	Inositol 1,4,5-triphosphate receptor associated 2 (Lymphoid-restricted membrane protein) (Protein Jaw1) [Cleaved into: Processed inositol 1,4,5-triphosphate receptor associated 2 ]	IRAG2 JAW1 LRMP	+			GOCC, TMHMM2.0	+		+		+			2
Q16099	GRIK4_HUMAN	Glutamate receptor ionotropic, kainate 4, GluK4 (Excitatory amino acid receptor 1, EAA1) (Glutamate receptor KA-1, KA1)	GRIK4 GRIK	+			GOCC, TMHMM2.0	+							2
P13498	CY24A_HUMAN	Cytochrome b-245 light chain (Cytochrome b(558) alpha chain) (Cytochrome b558 subunit alpha) (Neutrophil cytochrome b 22 kDa polypeptide) (Superoxide-generating NADPH oxidase light chain subunit) (p22 phagocyte B-cytochrome) (p22-phox, p22phox)	CYBA	+			GOCC, TMHMM2.0	+				+	+		2
P29317	EPHA2_HUMAN	Ephrin type-A receptor 2, EC 2.7.10.1 (Epithelial cell kinase) (Tyrosine-protein kinase receptor ECK)	EPHA2 ECK	+			GOCC, TMHMM2.0	+							1
P18084	ITB5_HUMAN	Integrin beta-5	ITGB5	+			GOCC, TMHMM2.0	+							1
O43752	STX6_HUMAN	Syntaxin-6	STX6	+			GOCC, TMHMM2.0	+			+		+		1
Q9H6X2	ANTR1_HUMAN	Anthrax toxin receptor 1 (Tumor endothelial marker 8)	ANTXR1 ATR TEM8	+			GOCC, TMHMM2.0	+					+		1
P38435	VKGC_HUMAN	Vitamin K-dependent gamma-carboxylase, EC 4.1.1.90 (Gamma-glutamyl carboxylase) (Peptidyl-glutamate 4-carboxylase) (Vitamin K gamma glutamyl carboxylase)	GGCX GC	+			GOCC, TMHMM2.0					+			1
Q9NPL8	TIDC1_HUMAN	Complex I assembly factor TIMMDC1, mitochondrial (Protein M5-14) (Translocase of inner mitochondrial membrane domain-containing protein 1, TIMM domain containing-protein 1)	TIMMDC1 C3orf1 UNQ247/PRO284	+			GOCC, TMHMM2.0		+						1
P48060	GLIP1_HUMAN	Glioma pathogenesis-related protein 1, GliPR 1 (Protein RTVP-1)	GLIPR1 GLIPR RTVP1	+			GOCC, TMHMM2.0	+							1
Q6RW13	ATRAP_HUMAN	Type-1 angiotensin II receptor-associated protein (AT1 receptor-associated protein)	AGTRAP ATRAP	+			GOCC, TMHMM2.0	+			+	+	+		1
Q8TCT8	SPP2A_HUMAN	Signal peptide peptidase-like 2A, SPP-like 2A, SPPL2a, EC 3.4.23.- (Intramembrane protease 3, IMP-3) (Presenilin-like protein 2)	SPPL2A IMP3 PSL2 PSEC0147	+			GOCC, TMHMM2.0	+				+	+		1
Q71RG4	TMUB2_HUMAN	Transmembrane and ubiquitin-like domain-containing protein 2	TMUB2 FP2653 UNQ1897/PRO4343	+			GOCC, TMHMM2.0							+	1
Q9NXS2	QPCTL_HUMAN	Glutaminyl-peptide cyclotransferase-like protein, EC 2.3.2.5 (Golgi-resident glutaminyl-peptide cyclotransferase) (isoQC, gQC)	QPCTL	+			GOCC, TMHMM2.0				+				1
Q9UIG8	SO3A1_HUMAN	Solute carrier organic anion transporter family member 3A1, OATP3A1 (Organic anion transporter polypeptide-related protein 3, OATP-RP3, OATPRP3) (Organic anion-transporting polypeptide D, OATP-D) (PGE1 transporter) (Sodium-independent organic anion transporter D) (Solute carrier family 21 member 11)	SLCO3A1 OATP3A1 OATPD SLC21A11	+			GOCC, TMHMM2.0	+							1
Q9H1E5	TMX4_HUMAN	Thioredoxin-related transmembrane protein 4 (Thioredoxin domain-containing protein 13)	TMX4 KIAA1162 TXNDC13 PSEC0095 UNQ475/PRO938	+			GOCC, TMHMM2.0			+					1
Q9GZT6	CC90B_HUMAN	Coiled-coil domain-containing protein 90B, mitochondrial	CCDC90B CUA003 MDS011 MDS025	+			GOCC, TMHMM2.0		+						1
O14524	NEMP1_HUMAN	Nuclear envelope integral membrane protein 1	NEMP1 KIAA0286 TMEM194 TMEM194A	+			GOCC, TMHMM2.0			+					1
Q13433	S39A6_HUMAN	Zinc transporter ZIP6 (Estrogen-regulated protein LIV-1) (Solute carrier family 39 member 6) (Zrt- and Irt-like protein 6, ZIP-6)	SLC39A6 LIV1 ZIP6	+			GOCC, TMHMM2.0	+							1
O00124	UBXN8_HUMAN	UBX domain-containing protein 8 (Reproduction 8 protein, Rep-8 protein) (UBX domain-containing protein 6)	UBXN8 D8S2298E REP8 UBXD6	+			GOCC, TMHMM2.0					+			1
Q9BV81	EMC6_HUMAN	ER membrane protein complex subunit 6 (Transmembrane protein 93)	EMC6 TMEM93	+			GOCC, TMHMM2.0					+			1
Q96DA6	TIM14_HUMAN	Mitochondrial import inner membrane translocase subunit TIM14 (DnaJ homolog subfamily C member 19)	DNAJC19 TIM14 TIMM14	+			GOCC, TMHMM2.0		+						1
Q9H5V8	CDCP1_HUMAN	CUB domain-containing protein 1 (Membrane glycoprotein gp140) (Subtractive immunization M plus HEp3-associated 135 kDa protein, SIMA135) (Transmembrane and associated with src kinases) (CD antigen CD318)	CDCP1 TRASK UNQ2486/PRO5773	+			GOCC, TMHMM2.0	+							1
Q9HCJ1	ANKH_HUMAN	Progressive ankylosis protein homolog, ANK	ANKH KIAA1581 UNQ241/PRO274	+			GOCC, TMHMM2.0	+							1
Q16706	MA2A1_HUMAN	Alpha-mannosidase 2, EC 3.2.1.114 (Golgi alpha-mannosidase II, AMan II, Man II) (Mannosidase alpha class 2A member 1) (Mannosyl-oligosaccharide 1,3-1,6-alpha-mannosidase)	MAN2A1 MANA2	+			GOCC, TMHMM2.0				+				1
Q5UCC4	EMC10_HUMAN	ER membrane protein complex subunit 10 (Hematopoietic signal peptide-containing membrane domain-containing protein 1)	EMC10 C19orf63 INM02 UNQ764/PRO1556	+			GOCC, TMHMM2.0					+			1
O75976	CBPD_HUMAN	Carboxypeptidase D, EC 3.4.17.22 (Metallocarboxypeptidase D) (gp180)	CPD	+			GOCC, TMHMM2.0	+							1
P03886	NU1M_HUMAN	NADH-ubiquinone oxidoreductase chain 1, EC 7.1.1.2 (NADH dehydrogenase subunit 1)	MT-ND1 MTND1 NADH1 ND1	+			GOCC, TMHMM2.0		+						1
O15431	COPT1_HUMAN	High affinity copper uptake protein 1 (Copper transporter 1, hCTR1) (Solute carrier family 31 member 1)	SLC31A1 COPT1 CTR1	+			GOCC, TMHMM2.0	+							1
O95562	SFT2B_HUMAN	Vesicle transport protein SFT2B (SFT2 domain-containing protein 2)	SFT2D2 UNQ512/PRO1027	+			GOCC, TMHMM2.0							+	1
Q9Y5H5	PCDA9_HUMAN	Protocadherin alpha-9, PCDH-alpha-9	PCDHA9 KIAA0345	+			GOCC, TMHMM2.0	+							1
Q8IWT6	LRC8A_HUMAN	Volume-regulated anion channel subunit LRRC8A (Leucine-rich repeat-containing protein 8A, HsLRRC8A) (Swelling protein 1)	LRRC8A KIAA1437 LRRC8 SWELL1 UNQ221/PRO247	+			GOCC, TMHMM2.0	+					+		1
Q9UPQ8	DOLK_HUMAN	Dolichol kinase, EC 2.7.1.108 (Transmembrane protein 15)	DOLK KIAA1094 TMEM15 UNQ2422/PRO4980	+			GOCC, TMHMM2.0					+			1
Q9NUU6	OTULL_HUMAN	Inactive ubiquitin thioesterase OTULINL	OTULINL FAM105A	+			GOCC, TMHMM2.0			+		+			1
Q8N6C5	IGSF1_HUMAN	Immunoglobulin superfamily member 1, IgSF1 (Immunoglobulin-like domain-containing protein 1) (Inhibin-binding protein, InhBP) (Pituitary gland-specific factor 2) (p120)	IGSF1 IGDC1 KIAA0364 PGSF2	+			GOCC, TMHMM2.0							+	1
Q9H2V7	SPNS1_HUMAN	Protein spinster homolog 1 (HSpin1) (Spinster-like protein 1)	SPNS1 SPIN1 PP20300	+			GOCC, TMHMM2.0		+				+		1
Q12981	SEC20_HUMAN	Vesicle transport protein SEC20 (BCL2/adenovirus E1B 19 kDa protein-interacting protein 1) (Transformation-related gene 8 protein, TRG-8)	BNIP1 NIP1 SEC20L TRG8	+			GOCC, TMHMM2.0		+	+		+			1
Q06136	KDSR_HUMAN	3-ketodihydrosphingosine reductase, KDS reductase, EC 1.1.1.102 (3-dehydrosphinganine reductase) (Follicular variant translocation protein 1, FVT-1) (Short chain dehydrogenase/reductase family 35C member 1)	KDSR FVT1 SDR35C1	+			GOCC, TMHMM2.0					+			1
Q9UI14	PRAF1_HUMAN	Prenylated Rab acceptor protein 1 (PRA1 family protein 1)	RABAC1 PRA1 PRAF1	+			GOCC, TMHMM2.0	+							1
Q5T9L3	WLS_HUMAN	Protein wntless homolog (Integral membrane protein GPR177) (Protein evenness interrupted homolog, EVI) (Putative NF-kappa-B-activating protein 373)	WLS C1orf139 GPR177 UNQ85/PRO18667	+			GOCC, TMHMM2.0	+			+	+	+		1
Q9UEU0	VTI1B_HUMAN	Vesicle transport through interaction with t-SNAREs homolog 1B (Vesicle transport v-SNARE protein Vti1-like 1) (Vti1-rp1)	VTI1B VTI1 VTI1L VTI1L1 VTI2	+			GOCC, TMHMM2.0					+	+		1
A0PK11	CLRN2_HUMAN	Clarin-2	CLRN2	+			GOCC, TMHMM2.0							+	1
O00533	NCHL1_HUMAN	Neural cell adhesion molecule L1-like protein (Close homolog of L1) [Cleaved into: Processed neural cell adhesion molecule L1-like protein ]	CHL1 CALL	+			GOCC, TMHMM2.0	+							1
P08069	IGF1R_HUMAN	Insulin-like growth factor 1 receptor, EC 2.7.10.1 (Insulin-like growth factor I receptor, IGF-I receptor) (CD antigen CD221) [Cleaved into: Insulin-like growth factor 1 receptor alpha chain; Insulin-like growth factor 1 receptor beta chain ]	IGF1R	+			GOCC, TMHMM2.0	+							1
Q86VZ5	SMS1_HUMAN	Phosphatidylcholine:ceramide cholinephosphotransferase 1, EC 2.7.8.27 (Medulla oblongata-derived protein, Protein Mob) (Sphingomyelin synthase 1) (Transmembrane protein 23)	SGMS1 MOB SMS1 TMEM23	+			GOCC, TMHMM2.0	+			+	+			1
Q14517	FAT1_HUMAN	Protocadherin Fat 1 (Cadherin family member 7) (Cadherin-related tumor suppressor homolog) (Protein fat homolog) [Cleaved into: Protocadherin Fat 1, nuclear form ]	FAT1 CDHF7 FAT	+			GOCC, TMHMM2.0	+							1
P35610	SOAT1_HUMAN	Sterol O-acyltransferase 1, EC 2.3.1.26 (Acyl-coenzyme A:cholesterol acyltransferase 1, ACAT-1) (Cholesterol acyltransferase 1)	SOAT1 ACACT ACACT1 ACAT ACAT1 SOAT STAT	+			GOCC, TMHMM2.0					+			1
Q96I36	COX14_HUMAN	Cytochrome c oxidase assembly protein COX14	COX14 C12orf62	+			GOCC, TMHMM2.0		+						1
Q96IW7	SC22A_HUMAN	Vesicle-trafficking protein SEC22a (SEC22 vesicle-trafficking protein homolog A) (SEC22 vesicle-trafficking protein-like 2)	SEC22A SEC22L2	+			GOCC, TMHMM2.0					+			1
P57773	CXA9_HUMAN	Gap junction alpha-9 protein (Connexin-58, Cx58) (Connexin-59, Cx59) (Gap junction alpha-10 protein)	GJA9 GJA10	+			GOCC, TMHMM2.0							+	1
Q7Z404	TMC4_HUMAN	Transmembrane channel-like protein 4	TMC4	+			GOCC, TMHMM2.0	+							1
Q9H9K5	MER34_HUMAN	Endogenous retroviral envelope protein HEMO (Endogenous retrovirus group MER34 member 1 Env polyprotein) (HERV-MER_4q12 provirus ancestral Env polyprotein) (Human endogenous MER34 (medium-reiteration-frequency-family-34) open reading frame) (Human endogenous MER34 ORF, HEMO) [Cleaved into: Endogenous retroviral envelope protein HEMO, secreted form (Endogenous retroviral envelope protein HEMO, 48 …	ERVMER34-1 HEMO LP9056	+			GOCC, TMHMM2.0	+							1
P29274	AA2AR_HUMAN	Adenosine receptor A2a	ADORA2A ADORA2	+			GOCC, TMHMM2.0	+							1
Q8N5Y8	PAR16_HUMAN	Protein mono-ADP-ribosyltransferase PARP16, EC 2.4.2.- (ADP-ribosyltransferase diphtheria toxin-like 15) (Poly [ADP-ribose] polymerase 16, PARP-16)	PARP16 ARTD15 C15orf30	+			GOCC, TMHMM2.0			+		+			1
Q92508	PIEZ1_HUMAN	Piezo-type mechanosensitive ion channel component 1 (Membrane protein induced by beta-amyloid treatment, Mib) (Protein FAM38A)	PIEZO1 FAM38A KIAA0233	+			GOCC, TMHMM2.0	+			+	+			1
Q8N6L1	KTAP2_HUMAN	Keratinocyte-associated protein 2 (KCP-2) (Dolichyl-diphosphooligosaccharide--protein glycosyltransferase subunit KCP2) (Oligosaccharyl transferase subunit KCP2)	KRTCAP2 KCP2	+			GOCC, TMHMM2.0					+			3
Q15149	PLEC_HUMAN	Plectin, PCN, PLTN (Hemidesmosomal protein 1, HD1) (Plectin-1)	PLEC PLEC1	+			GOCC	+	+						1225
P58107	EPIPL_HUMAN	Epiplakin (450 kDa epidermal antigen)	EPPK1 EPIPL	+			GOCC	+							508
P21333	FLNA_HUMAN	Filamin-A, FLN-A (Actin-binding protein 280, ABP-280) (Alpha-filamin) (Endothelial actin-binding protein) (Filamin-1) (Non-muscle filamin)	FLNA FLN FLN1	+			GOCC	+							448
P35579	MYH9_HUMAN	Myosin-9 (Cellular myosin heavy chain, type A) (Myosin heavy chain 9) (Myosin heavy chain, non-muscle IIa) (Non-muscle myosin heavy chain A, NMMHC-A) (Non-muscle myosin heavy chain IIa, NMMHC II-a, NMMHC-IIA)	MYH9	+			GOCC	+							383
P08670	VIME_HUMAN	Vimentin	VIM	+			GOCC	+							318
P21796	VDAC1_HUMAN	Voltage-dependent anion-selective channel protein 1, VDAC-1, hVDAC1 (Outer mitochondrial membrane protein porin 1) (Plasmalemmal porin) (Porin 31HL) (Porin 31HM)	VDAC1 VDAC	+			GOCC	+	+						316
P07437	TBB5_HUMAN	Tubulin beta chain (Tubulin beta-5 chain)	TUBB TUBB5 OK/SW-cl.56	+			GOCC			+					267
O75369	FLNB_HUMAN	Filamin-B, FLN-B (ABP-278) (ABP-280 homolog) (Actin-binding-like protein) (Beta-filamin) (Filamin homolog 1, Fh1) (Filamin-3) (Thyroid autoantigen) (Truncated actin-binding protein, Truncated ABP)	FLNB FLN1L FLN3 TABP TAP	+			GOCC	+							257
P11021	BIP_HUMAN	Endoplasmic reticulum chaperone BiP, EC 3.6.4.10 (78 kDa glucose-regulated protein, GRP-78) (Binding-immunoglobulin protein, BiP) (Heat shock protein 70 family protein 5, HSP70 family protein 5) (Heat shock protein family A member 5) (Immunoglobulin heavy chain-binding protein)	HSPA5 GRP78	+			GOCC	+			+	+			251
P60709	ACTB_HUMAN	Actin, cytoplasmic 1 (Beta-actin) [Cleaved into: Actin, cytoplasmic 1, N-terminally processed ]	ACTB	+			GOCC	+							249
Q09666	AHNK_HUMAN	Neuroblast differentiation-associated protein AHNAK (Desmoyokin)	AHNAK PM227	+			GOCC	+					+		248
P63261	ACTG_HUMAN	Actin, cytoplasmic 2 (Gamma-actin) [Cleaved into: Actin, cytoplasmic 2, N-terminally processed ]	ACTG1 ACTG	+			GOCC	+							248
P14625	ENPL_HUMAN	Endoplasmin (94 kDa glucose-regulated protein, GRP-94) (Heat shock protein 90 kDa beta member 1) (Tumor rejection antigen 1) (gp96 homolog)	HSP90B1 GRP94 TRA1	+			GOCC	+				+			240
Q13813	SPTN1_HUMAN	Spectrin alpha chain, non-erythrocytic 1 (Alpha-II spectrin) (Fodrin alpha chain) (Spectrin, non-erythroid alpha subunit)	SPTAN1 NEAS SPTA2	+			GOCC	+							227
Q00610	CLH1_HUMAN	Clathrin heavy chain 1 (Clathrin heavy chain on chromosome 17, CLH-17)	CLTC CLH17 CLTCL2 KIAA0034	+			GOCC	+					+		217
P10809	CH60_HUMAN	60 kDa heat shock protein, mitochondrial, EC 5.6.1.7 (60 kDa chaperonin) (Chaperonin 60, CPN60) (Heat shock protein 60, HSP-60, Hsp60) (HuCHA60) (Mitochondrial matrix protein P1) (P60 lymphocyte protein)	HSPD1 HSP60	+			GOCC	+	+						214
O43707	ACTN4_HUMAN	Alpha-actinin-4 (Non-muscle alpha-actinin 4)	ACTN4	+			GOCC	+							211
Q9Y490	TLN1_HUMAN	Talin-1	TLN1 KIAA1027 TLN	+			GOCC	+							205
Q01082	SPTB2_HUMAN	Spectrin beta chain, non-erythrocytic 1 (Beta-II spectrin) (Fodrin beta chain) (Spectrin, non-erythroid beta chain 1)	SPTBN1 SPTB2	+			GOCC	+							196
P02545	LMNA_HUMAN	Prelamin-A/C [Cleaved into: Lamin-A/C (70 kDa lamin) (Renal carcinoma antigen NY-REN-32) ]	LMNA LMN1	+			GOCC			+					196
P08238	HS90B_HUMAN	Heat shock protein HSP 90-beta, HSP 90 (Heat shock 84 kDa, HSP 84, HSP84)	HSP90AB1 HSP90B HSPC2 HSPCB	+			GOCC	+					+		193
P46940	IQGA1_HUMAN	Ras GTPase-activating-like protein IQGAP1 (p195)	IQGAP1 KIAA0051	+			GOCC	+							192
P31327	CPSM_HUMAN	Carbamoyl-phosphate synthase [ammonia], mitochondrial, EC 6.3.4.16 (Carbamoyl-phosphate synthetase I, CPSase I)	CPS1	+			GOCC		+						192
P78527	PRKDC_HUMAN	DNA-dependent protein kinase catalytic subunit, DNA-PK catalytic subunit, DNA-PKcs, EC 2.7.11.1 (DNPK1) (p460)	PRKDC HYRC HYRC1	+			GOCC							+	184
Q16891	MIC60_HUMAN	MICOS complex subunit MIC60 (Cell proliferation-inducing gene 4/52 protein) (Mitochondrial inner membrane protein) (Mitofilin) (p87/89)	IMMT HMP MIC60 MINOS2 PIG4 PIG52	+			GOCC		+						168
P49327	FAS_HUMAN	Fatty acid synthase, EC 2.3.1.85 (Type I fatty acid synthase) [Includes: [Acyl-carrier-protein] S-acetyltransferase, EC 2.3.1.38; [Acyl-carrier-protein] S-malonyltransferase, EC 2.3.1.39; 3-oxoacyl-[acyl-carrier-protein] synthase, EC 2.3.1.41; 3-oxoacyl-[acyl-carrier-protein] reductase, EC 1.1.1.100; 3-hydroxyacyl-[acyl-carrier-protein] dehydratase, EC 4.2.1.59; Enoyl-[acyl-carrier-protein] reduc…	FASN FAS	+			GOCC	+							167
Q9NVI7	ATD3A_HUMAN	ATPase family AAA domain-containing protein 3A	ATAD3A	+			GOCC		+						158
Q14204	DYHC1_HUMAN	Cytoplasmic dynein 1 heavy chain 1 (Cytoplasmic dynein heavy chain 1) (Dynein heavy chain, cytosolic)	DYNC1H1 DHC1 DNCH1 DNCL DNECL DYHC KIAA0325	+			GOCC							+	157
P07900	HS90A_HUMAN	Heat shock protein HSP 90-alpha, EC 3.6.4.10 (Heat shock 86 kDa, HSP 86, HSP86) (Lipopolysaccharide-associated protein 2, LAP-2, LPS-associated protein 2) (Renal carcinoma antigen NY-REN-38)	HSP90AA1 HSP90A HSPC1 HSPCA	+			GOCC	+							154
P25705	ATPA_HUMAN	ATP synthase subunit alpha, mitochondrial (ATP synthase F1 subunit alpha)	ATP5F1A ATP5A ATP5A1 ATP5AL2 ATPM	+			GOCC	+	+						152
P52272	HNRPM_HUMAN	Heterogeneous nuclear ribonucleoprotein M, hnRNP M	HNRNPM HNRPM NAGR1	+			GOCC							+	151
P11142	HSP7C_HUMAN	Heat shock cognate 71 kDa protein, EC 3.6.4.10 (Heat shock 70 kDa protein 8) (Lipopolysaccharide-associated protein 1, LAP-1, LPS-associated protein 1)	HSPA8 HSC70 HSP73 HSPA10	+			GOCC	+					+		150
P45880	VDAC2_HUMAN	Voltage-dependent anion-selective channel protein 2, VDAC-2, hVDAC2 (Outer mitochondrial membrane protein porin 2)	VDAC2	+			GOCC		+						148
P42704	LPPRC_HUMAN	Leucine-rich PPR motif-containing protein, mitochondrial (130 kDa leucine-rich protein, LRP 130) (GP130)	LRPPRC LRP130	+			GOCC			+					147
P20700	LMNB1_HUMAN	Lamin-B1	LMNB1 LMN2 LMNB	+			GOCC			+					147
P49792	RBP2_HUMAN	E3 SUMO-protein ligase RanBP2, EC 2.3.2.- (358 kDa nucleoporin) (Nuclear pore complex protein Nup358) (Nucleoporin Nup358) (Ran-binding protein 2, RanBP2) (p270)	RANBP2 NUP358	+			GOCC			+					142
P06576	ATPB_HUMAN	ATP synthase subunit beta, mitochondrial, EC 7.1.2.2 (ATP synthase F1 subunit beta)	ATP5F1B ATP5B ATPMB ATPSB	+			GOCC	+	+						140
P31930	QCR1_HUMAN	Cytochrome b-c1 complex subunit 1, mitochondrial (Complex III subunit 1) (Core protein I) (Ubiquinol-cytochrome-c reductase complex core protein 1)	UQCRC1	+			GOCC		+						130
Q5T9A4	ATD3B_HUMAN	ATPase family AAA domain-containing protein 3B (AAA-TOB3)	ATAD3B KIAA1273 TOB3	+			GOCC	+	+						125
P22695	QCR2_HUMAN	Cytochrome b-c1 complex subunit 2, mitochondrial (Complex III subunit 2) (Core protein II) (Ubiquinol-cytochrome-c reductase complex core protein 2)	UQCRC2	+			GOCC		+						122
P38646	GRP75_HUMAN	Stress-70 protein, mitochondrial (75 kDa glucose-regulated protein, GRP-75) (Heat shock 70 kDa protein 9) (Mortalin, MOT) (Peptide-binding protein 74, PBP74)	HSPA9 GRP75 HSPA9B mt-HSP70	+			GOCC		+						115
Q12931	TRAP1_HUMAN	Heat shock protein 75 kDa, mitochondrial, HSP 75 (TNFR-associated protein 1) (Tumor necrosis factor type 1 receptor-associated protein, TRAP-1)	TRAP1 HSP75	+			GOCC		+						114
P49411	EFTU_HUMAN	Elongation factor Tu, mitochondrial, EF-Tu (P43)	TUFM	+			GOCC							+	109
P55072	TERA_HUMAN	Transitional endoplasmic reticulum ATPase, TER ATPase, EC 3.6.4.6 (15S Mg(2+)-ATPase p97 subunit) (Valosin-containing protein, VCP)	VCP	+			GOCC					+			107
P0DMV8	HS71A_HUMAN	Heat shock 70 kDa protein 1A (Heat shock 70 kDa protein 1, HSP70-1, HSP70.1)	HSPA1A HSP72 HSPA1 HSX70	+			GOCC	+							105
P60842	IF4A1_HUMAN	Eukaryotic initiation factor 4A-I, eIF-4A-I, eIF4A-I, EC 3.6.4.13 (ATP-dependent RNA helicase eIF4A-1)	EIF4A1 DDX2A EIF4A	+			GOCC							+	105
P13639	EF2_HUMAN	Elongation factor 2, EF-2	EEF2 EF2	+			GOCC	+							105
P68104	EF1A1_HUMAN	Elongation factor 1-alpha 1, EF-1-alpha-1 (Elongation factor Tu, EF-Tu) (Eukaryotic elongation factor 1 A-1, eEF1A-1) (Leukocyte receptor cluster member 7)	EEF1A1 EEF1A EF1A LENG7	+			GOCC	+					+		101
P12814	ACTN1_HUMAN	Alpha-actinin-1 (Alpha-actinin cytoskeletal isoform) (F-actin cross-linking protein) (Non-muscle alpha-actinin-1)	ACTN1	+			GOCC	+							101
Q14980	NUMA1_HUMAN	Nuclear mitotic apparatus protein 1 (Nuclear matrix protein-22, NMP-22) (Nuclear mitotic apparatus protein, NuMA protein) (SP-H antigen)	NUMA1 NMP22 NUMA	+			GOCC	+			+				98
Q15155	NOMO1_HUMAN	Nodal modulator 1 (pM5 protein)	NOMO1 PM5	+			GOCC					+			94
Q9UJS0	S2513_HUMAN	Electrogenic aspartate/glutamate antiporter SLC25A13, mitochondrial (Calcium-binding mitochondrial carrier protein Aralar2, ARALAR-related gene 2, ARALAR2) (Citrin) (Mitochondrial aspartate glutamate carrier 2) (Solute carrier family 25 member 13)	SLC25A13	+			GOCC	+	+						93
Q5JPE7	NOMO2_HUMAN	Nodal modulator 2 (pM5 protein 2)	NOMO2	+			GOCC					+			92
P36578	RL4_HUMAN	60S ribosomal protein L4 (60S ribosomal protein L1) (Large ribosomal subunit protein uL4)	RPL4 RPL1	+			GOCC							+	92
P07355	ANXA2_HUMAN	Annexin A2 (Annexin II) (Annexin-2) (Calpactin I heavy chain) (Calpactin-1 heavy chain) (Chromobindin-8) (Lipocortin II) (Placental anticoagulant protein IV, PAP-IV) (Protein I) (p36)	ANXA2 ANX2 ANX2L4 CAL1H LPC2D	+			GOCC	+					+		90
Q99623	PHB2_HUMAN	Prohibitin-2 (B-cell receptor-associated protein BAP37) (D-prohibitin) (Repressor of estrogen receptor activity)	PHB2 BAP REA	+			GOCC	+	+						89
P61978	HNRPK_HUMAN	Heterogeneous nuclear ribonucleoprotein K, hnRNP K (Transformation up-regulated nuclear protein, TUNP)	HNRNPK HNRPK	+			GOCC							+	83
P50454	SERPH_HUMAN	Serpin H1 (47 kDa heat shock protein) (Arsenic-transactivated protein 3, AsTP3) (Cell proliferation-inducing gene 14 protein) (Collagen-binding protein, Colligin) (Rheumatoid arthritis-related antigen RA-A47)	SERPINH1 CBP1 CBP2 HSP47 SERPINH2 PIG14	+			GOCC				+	+			82
Q9UJZ1	STML2_HUMAN	Stomatin-like protein 2, mitochondrial, SLP-2 (EPB72-like protein 2) (Paraprotein target 7, Paratarg-7)	STOML2 SLP2 HSPC108	+			GOCC	+	+						81
P35232	PHB1_HUMAN	Prohibitin 1	PHB1 PHB	+			GOCC	+	+						80
P07237	PDIA1_HUMAN	Protein disulfide-isomerase, PDI, EC 5.3.4.1 (Cellular thyroid hormone-binding protein) (Prolyl 4-hydroxylase subunit beta) (p55)	P4HB ERBA2L PDI PDIA1 PO4DB	+			GOCC	+			+	+			78
Q14974	IMB1_HUMAN	Importin subunit beta-1 (Importin-90) (Karyopherin subunit beta-1) (Nuclear factor p97) (Pore targeting complex 97 kDa subunit, PTAC97)	KPNB1 NTF97	+			GOCC			+					76
O75694	NU155_HUMAN	Nuclear pore complex protein Nup155 (155 kDa nucleoporin) (Nucleoporin Nup155)	NUP155 KIAA0791	+			GOCC			+					75
Q15365	PCBP1_HUMAN	Poly(rC)-binding protein 1 (Alpha-CP1) (Heterogeneous nuclear ribonucleoprotein E1, hnRNP E1) (Nucleic acid-binding protein SUB2.3)	PCBP1	+			GOCC							+	74
P07099	HYEP_HUMAN	Epoxide hydrolase 1, EC 3.3.2.9 (Epoxide hydratase) (Microsomal epoxide hydrolase, mEH)	EPHX1 EPHX EPOX	+			GOCC					+			74
P10909	CLUS_HUMAN	Clusterin (Aging-associated gene 4 protein) (Apolipoprotein J, Apo-J) (Complement cytolysis inhibitor, CLI) (Complement-associated protein SP-40,40) (Ku70-binding protein 1) (NA1/NA2) (Sulfated glycoprotein 2, SGP-2) (Testosterone-repressed prostate message 2, TRPM-2) [Cleaved into: Clusterin beta chain (ApoJalpha) (Complement cytolysis inhibitor a chain); Clusterin alpha chain (ApoJbeta) (Comple…	CLU APOJ CLI KUB1 AAG4	+			GOCC	+	+						74
P24539	AT5F1_HUMAN	ATP synthase F(0) complex subunit B1, mitochondrial (ATP synthase peripheral stalk-membrane subunit b) (ATP synthase proton-transporting mitochondrial F(0) complex subunit B1) (ATP synthase subunit b, ATPase subunit b)	ATP5PB ATP5F1	+			GOCC		+						73
Q15084	PDIA6_HUMAN	Protein disulfide-isomerase A6, EC 5.3.4.1 (Endoplasmic reticulum protein 5, ER protein 5, ERp5) (Protein disulfide isomerase P5) (Thioredoxin domain-containing protein 7)	PDIA6 ERP5 P5 TXNDC7	+			GOCC	+			+	+			72
Q9Y6C9	MTCH2_HUMAN	Mitochondrial carrier homolog 2 (Met-induced mitochondrial protein)	MTCH2 MIMP HSPC032	+			GOCC		+						70
Q03252	LMNB2_HUMAN	Lamin-B2	LMNB2 LMN2	+			GOCC			+					70
P14923	PLAK_HUMAN	Junction plakoglobin (Catenin gamma) (Desmoplakin III) (Desmoplakin-3)	JUP CTNNG DP3	+			GOCC	+							69
Q9Y512	SAM50_HUMAN	Sorting and assembly machinery component 50 homolog (Transformation-related gene 3 protein, TRG-3)	SAMM50 SAM50 CGI-51 TRG3	+			GOCC		+						69
P08574	CY1_HUMAN	Cytochrome c1, heme protein, mitochondrial, EC 7.1.1.8 (Complex III subunit 4) (Complex III subunit IV) (Cytochrome b-c1 complex subunit 4) (Ubiquinol-cytochrome-c reductase complex cytochrome c1 subunit, Cytochrome c-1)	CYC1	+			GOCC		+						69
Q6NUK1	SCMC1_HUMAN	Calcium-binding mitochondrial carrier protein SCaMC-1 (Mitochondrial ATP-Mg/Pi carrier protein 1) (Mitochondrial Ca(2+)-dependent solute carrier protein 1) (Small calcium-binding mitochondrial carrier protein 1) (Solute carrier family 25 member 24)	SLC25A24 APC1 MCSC1 SCAMC1	+			GOCC		+						68
P51659	DHB4_HUMAN	Peroxisomal multifunctional enzyme type 2, MFE-2 (17-beta-hydroxysteroid dehydrogenase 4, 17-beta-HSD 4) (D-bifunctional protein, DBP) (Multifunctional protein 2, MFP-2) (Short chain dehydrogenase/reductase family 8C member 1) [Cleaved into: (3R)-hydroxyacyl-CoA dehydrogenase, EC 1.1.1.n12; Enoyl-CoA hydratase 2, EC 4.2.1.107, EC 4.2.1.119 (3-alpha,7-alpha,12-alpha-trihydroxy-5-beta-cholest-24-en…	HSD17B4 EDH17B4 SDR8C1	+			GOCC						+		67
Q96A33	CCD47_HUMAN	PAT complex subunit CCDC47 (Calumin) (Coiled-coil domain-containing protein 47)	CCDC47 GK001 MSTP041 PSEC0077	+			GOCC					+			67
P38919	IF4A3_HUMAN	Eukaryotic initiation factor 4A-III, eIF-4A-III, eIF4A-III, EC 3.6.4.13 (ATP-dependent RNA helicase DDX48) (ATP-dependent RNA helicase eIF4A-3) (DEAD box protein 48) (Eukaryotic initiation factor 4A-like NUK-34) (Eukaryotic translation initiation factor 4A isoform 3) (Nuclear matrix protein 265, NMP 265, hNMP 265) [Cleaved into: Eukaryotic initiation factor 4A-III, N-terminally processed ]	EIF4A3 DDX48 KIAA0111	+			GOCC							+	67
P00387	NB5R3_HUMAN	NADH-cytochrome b5 reductase 3, B5R, Cytochrome b5 reductase, EC 1.6.2.2 (Diaphorase-1) [Cleaved into: NADH-cytochrome b5 reductase 3 membrane-bound form; NADH-cytochrome b5 reductase 3 soluble form ]	CYB5R3 DIA1	+			GOCC		+			+			65
Q9Y277	VDAC3_HUMAN	Voltage-dependent anion-selective channel protein 3, VDAC-3, hVDAC3 (Outer mitochondrial membrane protein porin 3)	VDAC3	+			GOCC		+						65
Q08211	DHX9_HUMAN	ATP-dependent RNA helicase A, EC 3.6.4.13 (DEAH box protein 9) (DExH-box helicase 9) (Leukophysin, LKP) (Nuclear DNA helicase II, NDH II) (RNA helicase A)	DHX9 DDX9 LKP NDH2	+			GOCC							+	64
Q9UHG3	PCYOX_HUMAN	Prenylcysteine oxidase 1, EC 1.8.3.5 (Prenylcysteine lyase)	PCYOX1 KIAA0908 PCL1 UNQ597/PRO1183	+			GOCC	+							63
P26641	EF1G_HUMAN	Elongation factor 1-gamma, EF-1-gamma (eEF-1B gamma)	EEF1G EF1G PRO1608	+			GOCC							+	63
P18206	VINC_HUMAN	Vinculin (Metavinculin, MV)	VCL	+			GOCC	+							62
P43243	MATR3_HUMAN	Matrin-3	MATR3 KIAA0723	+			GOCC			+					62
O96008	TOM40_HUMAN	Mitochondrial import receptor subunit TOM40 homolog (Protein Haymaker) (Translocase of outer membrane 40 kDa subunit homolog) (p38.5)	TOMM40 C19orf1 PEREC1 TOM40	+			GOCC		+			+			62
P61106	RAB14_HUMAN	Ras-related protein Rab-14	RAB14	+			GOCC	+		+	+	+	+		62
P40939	ECHA_HUMAN	Trifunctional enzyme subunit alpha, mitochondrial (78 kDa gastrin-binding protein) (Monolysocardiolipin acyltransferase, EC 2.3.1.-) (TP-alpha) [Includes: Long-chain enoyl-CoA hydratase, EC 4.2.1.17; Long chain 3-hydroxyacyl-CoA dehydrogenase, EC 1.1.1.211 ]	HADHA HADH	+			GOCC		+						61
Q01813	PFKAP_HUMAN	ATP-dependent 6-phosphofructokinase, platelet type, ATP-PFK, PFK-P, EC 2.7.1.11 (6-phosphofructokinase type C) (Phosphofructo-1-kinase isozyme C, PFK-C) (Phosphohexokinase)	PFKP PFKF	+			GOCC							+	61
O75947	ATP5H_HUMAN	ATP synthase subunit d, mitochondrial, ATPase subunit d (ATP synthase peripheral stalk subunit d)	ATP5PD ATP5H My032	+			GOCC		+						61
Q9H0U4	RAB1B_HUMAN	Ras-related protein Rab-1B, EC 3.6.5.2	RAB1B	+			GOCC				+	+			59
P62820	RAB1A_HUMAN	Ras-related protein Rab-1A, EC 3.6.5.2 (YPT1-related protein)	RAB1A RAB1	+			GOCC				+		+		59
P62805	H4_HUMAN	Histone H4	H4C1 H4/A H4FA HIST1H4A; H4C2 H4/I H4FI HIST1H4B; H4C3 H4/G H4FG HIST1H4C; H4C4 H4/B H4FB HIST1H4D; H4C5 H4/J H4FJ HIST1H4E; H4C6 H4/C H4FC HIST1H4F; H4C8 H4/H H4FH HIST1H4H; H4C9 H4/M H4FM HIST1H4I; H4C11 H4/E H4FE HIST1H4J; H4C12 H4/D H4FD HIST1H4K; H4C13 H4/K H4FK HIST1H4L; H4C14 H4/N H4F2 H4FN HIST2H4 HIST2H4A; H4C15 H4/O H4FO HIST2H4B; H4-16 HIST4H4	+			GOCC							+	59
Q15366	PCBP2_HUMAN	Poly(rC)-binding protein 2 (Alpha-CP2) (Heterogeneous nuclear ribonucleoprotein E2, hnRNP E2)	PCBP2	+			GOCC							+	58
O75746	S2512_HUMAN	Electrogenic aspartate/glutamate antiporter SLC25A12, mitochondrial (Araceli hiperlarga, Aralar, Aralar1) (Mitochondrial aspartate glutamate carrier 1) (Solute carrier family 25 member 12)	SLC25A12 AGC1 ARALAR1	+			GOCC		+						57
P62424	RL7A_HUMAN	60S ribosomal protein L7a (Large ribosomal subunit protein eL8) (PLA-X polypeptide) (Surfeit locus protein 3)	RPL7A SURF-3 SURF3	+			GOCC							+	57
P35221	CTNA1_HUMAN	Catenin alpha-1 (Alpha E-catenin) (Cadherin-associated protein) (Renal carcinoma antigen NY-REN-13)	CTNNA1	+			GOCC	+							56
Q5JRA6	TGO1_HUMAN	Transport and Golgi organization protein 1 homolog, TANGO1 (C219-reactive peptide) (D320) (Melanoma inhibitory activity protein 3)	MIA3 KIAA0268 TANGO UNQ6077/PRO20088	+			GOCC					+			56
Q8N766	EMC1_HUMAN	ER membrane protein complex subunit 1	EMC1 KIAA0090 PSEC0263	+			GOCC					+			56
O00159	MYO1C_HUMAN	Unconventional myosin-Ic (Myosin I beta, MMI-beta, MMIb)	MYO1C	+			GOCC	+					+		54
O00571	DDX3X_HUMAN	ATP-dependent RNA helicase DDX3X, EC 3.6.4.13 (CAP-Rf) (DEAD box protein 3, X-chromosomal) (DEAD box, X isoform, DBX) (Helicase-like protein 2, HLP2)	DDX3X DBX DDX3	+			GOCC	+							54
Q8WUM4	PDC6I_HUMAN	Programmed cell death 6-interacting protein, PDCD6-interacting protein (ALG-2-interacting protein 1) (ALG-2-interacting protein X) (Hp95)	PDCD6IP AIP1 ALIX KIAA1375	+			GOCC							+	54
P53396	ACLY_HUMAN	ATP-citrate synthase, EC 2.3.3.8 (ATP-citrate (pro-S-)-lyase, ACL) (Citrate cleavage enzyme)	ACLY	+			GOCC							+	54
Q5JTV8	TOIP1_HUMAN	Torsin-1A-interacting protein 1 (Lamin-associated protein 1B, LAP1B)	TOR1AIP1 LAP1	+			GOCC			+					54
P23396	RS3_HUMAN	40S ribosomal protein S3, EC 4.2.99.18 (Small ribosomal subunit protein uS3)	RPS3 OK/SW-cl.26	+			GOCC	+	+						54
P62906	RL10A_HUMAN	60S ribosomal protein L10a (CSA-19) (Large ribosomal subunit protein uL1) (Neural precursor cell expressed developmentally down-regulated protein 6, NEDD-6)	RPL10A NEDD6	+			GOCC							+	54
P05388	RLA0_HUMAN	60S acidic ribosomal protein P0 (60S ribosomal protein L10E) (Large ribosomal subunit protein uL10)	RPLP0	+			GOCC							+	53
Q92621	NU205_HUMAN	Nuclear pore complex protein Nup205 (205 kDa nucleoporin) (Nucleoporin Nup205)	NUP205 C7orf14 KIAA0225	+			GOCC			+					52
O14980	XPO1_HUMAN	Exportin-1, Exp1 (Chromosome region maintenance 1 protein homolog)	XPO1 CRM1	+			GOCC			+					52
P22626	ROA2_HUMAN	Heterogeneous nuclear ribonucleoproteins A2/B1, hnRNP A2/B1	HNRNPA2B1 HNRPA2B1	+			GOCC							+	51
Q92743	HTRA1_HUMAN	Serine protease HTRA1, EC 3.4.21.- (High-temperature requirement A serine peptidase 1) (L56) (Serine protease 11)	HTRA1 HTRA PRSS11	+			GOCC	+							51
P18124	RL7_HUMAN	60S ribosomal protein L7 (Large ribosomal subunit protein uL30)	RPL7	+			GOCC							+	51
P61026	RAB10_HUMAN	Ras-related protein Rab-10, EC 3.6.5.2	RAB10	+			GOCC	+			+	+	+		51
Q8N1F7	NUP93_HUMAN	Nuclear pore complex protein Nup93 (93 kDa nucleoporin) (Nucleoporin Nup93)	NUP93 KIAA0095	+			GOCC			+					50
O60313	OPA1_HUMAN	Dynamin-like 120 kDa protein, mitochondrial, EC 3.6.5.5 (Optic atrophy protein 1) [Cleaved into: Dynamin-like 120 kDa protein, form S1 ]	OPA1 KIAA0567	+			GOCC		+						49
Q02978	M2OM_HUMAN	Mitochondrial 2-oxoglutarate/malate carrier protein, OGCP, alpha-oxoglutarate carrier (Solute carrier family 25 member 11, SLC25A11)	SLC25A11 SLC20A4	+			GOCC	+	+						49
Q6UB35	C1TM_HUMAN	Monofunctional C1-tetrahydrofolate synthase, mitochondrial, EC 6.3.4.3 (Formyltetrahydrofolate synthetase)	MTHFD1L FTHFSDC1	+			GOCC							+	49
P47985	UCRI_HUMAN	Cytochrome b-c1 complex subunit Rieske, mitochondrial, EC 7.1.1.8 (Complex III subunit 5) (Cytochrome b-c1 complex subunit 5) (Rieske iron-sulfur protein, RISP) (Rieske protein UQCRFS1) (Ubiquinol-cytochrome c reductase iron-sulfur subunit) [Cleaved into: Cytochrome b-c1 complex subunit 9, Su9, Subunit 9 (8 kDa subunit 9) (Complex III subunit IX) (Cytochrome b-c1 complex subunit 11) (UQCRFS1 mito…	UQCRFS1	+			GOCC		+						49
P04406	G3P_HUMAN	Glyceraldehyde-3-phosphate dehydrogenase, GAPDH, EC 1.2.1.12 (Peptidyl-cysteine S-nitrosylase GAPDH, EC 2.6.99.-)	GAPDH GAPD CDABP0047 OK/SW-cl.12	+			GOCC	+		+					48
P51149	RAB7A_HUMAN	Ras-related protein Rab-7a, EC 3.6.5.2	RAB7A RAB7	+			GOCC	+	+				+		48
P17844	DDX5_HUMAN	Probable ATP-dependent RNA helicase DDX5, EC 3.6.4.13 (DEAD box protein 5) (RNA helicase p68)	DDX5 G17P1 HELR HLR1	+			GOCC							+	48
Q15165	PON2_HUMAN	Serum paraoxonase/arylesterase 2, PON 2, EC 3.1.1.2, EC 3.1.1.81 (Aromatic esterase 2, A-esterase 2) (Serum aryldialkylphosphatase 2)	PON2	+			GOCC	+							47
P62701	RS4X_HUMAN	40S ribosomal protein S4, X isoform (SCR10) (Single copy abundant mRNA protein) (Small ribosomal subunit protein eS4)	RPS4X CCG2 RPS4 SCAR	+			GOCC							+	47
P26599	PTBP1_HUMAN	Polypyrimidine tract-binding protein 1, PTB (57 kDa RNA-binding protein PPTB-1) (Heterogeneous nuclear ribonucleoprotein I, hnRNP I)	PTBP1 PTB	+			GOCC							+	46
P07814	SYEP_HUMAN	Bifunctional glutamate/proline--tRNA ligase (Bifunctional aminoacyl-tRNA synthetase) (Cell proliferation-inducing gene 32 protein) (Glutamatyl-prolyl-tRNA synthetase) [Includes: Glutamate--tRNA ligase, EC 6.1.1.17 (Glutamyl-tRNA synthetase, GluRS); Proline--tRNA ligase, EC 6.1.1.15 (Prolyl-tRNA synthetase) ]	EPRS1 EPRS GLNS PARS QARS QPRS PIG32	+			GOCC	+							46
P30101	PDIA3_HUMAN	Protein disulfide-isomerase A3, EC 5.3.4.1 (58 kDa glucose-regulated protein) (58 kDa microsomal protein, p58) (Disulfide isomerase ER-60) (Endoplasmic reticulum resident protein 57, ER protein 57, ERp57) (Endoplasmic reticulum resident protein 60, ER protein 60, ERp60)	PDIA3 ERP57 ERP60 GRP58	+			GOCC	+					+		46
P40429	RL13A_HUMAN	60S ribosomal protein L13a (23 kDa highly basic protein) (Large ribosomal subunit protein uL13)	RPL13A	+			GOCC							+	46
P55060	XPO2_HUMAN	Exportin-2, Exp2 (Cellular apoptosis susceptibility protein) (Chromosome segregation 1-like protein) (Importin-alpha re-exporter)	CSE1L CAS XPO2	+			GOCC			+					45
O00410	IPO5_HUMAN	Importin-5, Imp5 (Importin subunit beta-3) (Karyopherin beta-3) (Ran-binding protein 5, RanBP5)	IPO5 KPNB3 RANBP5	+			GOCC							+	45
P53701	CCHL_HUMAN	Holocytochrome c-type synthase, EC 4.4.1.17 (Cytochrome c-type heme lyase)	HCCS CCHL	+			GOCC		+						45
P13797	PLST_HUMAN	Plastin-3 (T-plastin)	PLS3	+			GOCC	+							45
P12956	XRCC6_HUMAN	X-ray repair cross-complementing protein 6, EC 3.6.4.-, EC 4.2.99.- (5'-deoxyribose-5-phosphate lyase Ku70, 5'-dRP lyase Ku70) (70 kDa subunit of Ku antigen) (ATP-dependent DNA helicase 2 subunit 1) (ATP-dependent DNA helicase II 70 kDa subunit) (CTC box-binding factor 75 kDa subunit, CTC75, CTCBF) (DNA repair protein XRCC6) (Lupus Ku autoantigen protein p70, Ku70) (Thyroid-lupus autoantigen, TLA…	XRCC6 G22P1	+			GOCC							+	45
O60716	CTND1_HUMAN	Catenin delta-1 (Cadherin-associated Src substrate, CAS) (p120 catenin, p120(ctn)) (p120(cas))	CTNND1 KIAA0384	+			GOCC	+							45
P08240	SRPRA_HUMAN	Signal recognition particle receptor subunit alpha, SR-alpha (Docking protein alpha, DP-alpha)	SRPRA SRPR	+			GOCC					+			45
P31943	HNRH1_HUMAN	Heterogeneous nuclear ribonucleoprotein H, hnRNP H [Cleaved into: Heterogeneous nuclear ribonucleoprotein H, N-terminally processed ]	HNRNPH1 HNRPH HNRPH1	+			GOCC							+	44
P13010	XRCC5_HUMAN	X-ray repair cross-complementing protein 5, EC 3.6.4.- (86 kDa subunit of Ku antigen) (ATP-dependent DNA helicase 2 subunit 2) (ATP-dependent DNA helicase II 80 kDa subunit) (CTC box-binding factor 85 kDa subunit, CTC85, CTCBF) (DNA repair protein XRCC5) (Ku80) (Ku86) (Lupus Ku autoantigen protein p86) (Nuclear factor IV) (Thyroid-lupus autoantigen, TLAA) (X-ray repair complementing defective rep…	XRCC5 G22P2	+			GOCC	+							44
Q00839	HNRPU_HUMAN	Heterogeneous nuclear ribonucleoprotein U, hnRNP U (GRIP120) (Nuclear p120 ribonucleoprotein) (Scaffold-attachment factor A, SAF-A) (p120) (pp120)	HNRNPU C1orf199 HNRPU SAFA U21.1	+			GOCC	+							44
P36776	LONM_HUMAN	Lon protease homolog, mitochondrial, EC 3.4.21.53 (LONHs) (Lon protease-like protein, LONP) (Mitochondrial ATP-dependent protease Lon) (Serine protease 15)	LONP1 PRSS15	+			GOCC							+	43
P06748	NPM_HUMAN	Nucleophosmin, NPM (Nucleolar phosphoprotein B23) (Nucleolar protein NO38) (Numatrin)	NPM1 NPM	+			GOCC							+	43
P30050	RL12_HUMAN	60S ribosomal protein L12 (Large ribosomal subunit protein uL11)	RPL12	+			GOCC							+	43
Q7KZF4	SND1_HUMAN	Staphylococcal nuclease domain-containing protein 1, EC 3.1.31.1 (100 kDa coactivator) (EBNA2 coactivator p100) (Tudor domain-containing protein 11) (p100 co-activator)	SND1 TDRD11	+			GOCC							+	42
P80723	BASP1_HUMAN	Brain acid soluble protein 1 (22 kDa neuronal tissue-enriched acidic protein) (Neuronal axonal membrane protein NAP-22)	BASP1 NAP22	+			GOCC	+							42
P27797	CALR_HUMAN	Calreticulin (CRP55) (Calregulin) (Endoplasmic reticulum resident protein 60, ERp60) (HACBP) (grp60)	CALR CRTC	+			GOCC	+		+	+	+	+		41
P04899	GNAI2_HUMAN	Guanine nucleotide-binding protein G(i) subunit alpha-2 (Adenylate cyclase-inhibiting G alpha protein)	GNAI2 GNAI2B	+			GOCC	+							41
Q9NX63	MIC19_HUMAN	MICOS complex subunit MIC19 (Coiled-coil-helix-coiled-coil-helix domain-containing protein 3)	CHCHD3 MIC19 MINOS3	+			GOCC		+						41
P14927	QCR7_HUMAN	Cytochrome b-c1 complex subunit 7 (Complex III subunit 7) (Complex III subunit VII) (QP-C) (Ubiquinol-cytochrome c reductase complex 14 kDa protein)	UQCRB UQBP	+			GOCC		+						41
O75955	FLOT1_HUMAN	Flotillin-1	FLOT1	+			GOCC	+					+		40
Q9Y678	COPG1_HUMAN	Coatomer subunit gamma-1 (Gamma-1-coat protein, Gamma-1-COP)	COPG1 COPG	+			GOCC				+	+			40
P63241	IF5A1_HUMAN	Eukaryotic translation initiation factor 5A-1, eIF-5A-1, eIF-5A1 (Eukaryotic initiation factor 5A isoform 1, eIF-5A) (Rev-binding factor) (eIF-4D)	EIF5A	+			GOCC					+			40
P31689	DNJA1_HUMAN	DnaJ homolog subfamily A member 1 (DnaJ protein homolog 2) (HSDJ) (Heat shock 40 kDa protein 4) (Heat shock protein J2, HSJ-2) (Human DnaJ protein 2, hDj-2)	DNAJA1 DNAJ2 HDJ2 HSJ2 HSPF4	+			GOCC					+			40
P07996	TSP1_HUMAN	Thrombospondin-1 (Glycoprotein G)	THBS1 TSP TSP1	+			GOCC	+							40
O00148	DX39A_HUMAN	ATP-dependent RNA helicase DDX39A, EC 3.6.4.13 (DEAD box protein 39) (Nuclear RNA helicase URH49)	DDX39A DDX39	+			GOCC							+	40
Q02878	RL6_HUMAN	60S ribosomal protein L6 (Large ribosomal subunit protein eL6) (Neoplasm-related protein C140) (Tax-responsive enhancer element-binding protein 107, TaxREB107)	RPL6 TXREB1	+			GOCC							+	40
Q9NVH1	DJC11_HUMAN	DnaJ homolog subfamily C member 11	DNAJC11	+			GOCC		+						39
P08174	DAF_HUMAN	Complement decay-accelerating factor (CD antigen CD55)	CD55 CR DAF	+			GOCC	+			+	+			39
Q9Y2X3	NOP58_HUMAN	Nucleolar protein 58 (Nucleolar protein 5)	NOP58 NOL5 NOP5 HSPC120	+			GOCC							+	38
P46060	RAGP1_HUMAN	Ran GTPase-activating protein 1, RanGAP1	RANGAP1 KIAA1835 SD	+			GOCC			+					38
Q9UBX3	DIC_HUMAN	Mitochondrial dicarboxylate carrier, DIC (Solute carrier family 25 member 10)	SLC25A10 DIC	+			GOCC		+						38
P15880	RS2_HUMAN	40S ribosomal protein S2 (40S ribosomal protein S4) (Protein LLRep3) (Small ribosomal subunit protein uS5)	RPS2 RPS4	+			GOCC							+	38
P69905	HBA_HUMAN	Hemoglobin subunit alpha (Alpha-globin) (Hemoglobin alpha chain) [Cleaved into: Hemopressin ]	HBA1; HBA2	+			GOCC							+	38
P26373	RL13_HUMAN	60S ribosomal protein L13 (Breast basic conserved protein 1) (Large ribosomal subunit protein eL13)	RPL13 BBC1 OK/SW-cl.46	+			GOCC							+	38
Q96TA1	NIBA2_HUMAN	Protein Niban 2 (Meg-3) (Melanoma invasion by ERK, MINERVA) (Niban-like protein 1) (Protein FAM129B)	NIBAN2 C9orf88 FAM129B	+			GOCC	+							37
P54886	P5CS_HUMAN	Delta-1-pyrroline-5-carboxylate synthase, P5CS (Aldehyde dehydrogenase family 18 member A1) [Includes: Glutamate 5-kinase, GK, EC 2.7.2.11 (Gamma-glutamyl kinase); Gamma-glutamyl phosphate reductase, GPR, EC 1.2.1.41 (Glutamate-5-semialdehyde dehydrogenase) (Glutamyl-gamma-semialdehyde dehydrogenase) ]	ALDH18A1 GSAS P5CS PYCS	+			GOCC		+						37
O94905	ERLN2_HUMAN	Erlin-2 (Endoplasmic reticulum lipid raft-associated protein 2) (Stomatin-prohibitin-flotillin-HflC/K domain-containing protein 2, SPFH domain-containing protein 2)	ERLIN2 C8orf2 SPFH2 UNQ2441/PRO5003/PRO9924	+			GOCC	+				+			37
P27348	1433T_HUMAN	14-3-3 protein theta (14-3-3 protein T-cell) (14-3-3 protein tau) (Protein HS1)	YWHAQ	+			GOCC							+	37
P51148	RAB5C_HUMAN	Ras-related protein Rab-5C, EC 3.6.5.2 (L1880) (RAB5L)	RAB5C RABL	+			GOCC	+					+		37
O15031	PLXB2_HUMAN	Plexin-B2 (MM1)	PLXNB2 KIAA0315	+			GOCC	+							36
P11586	C1TC_HUMAN	C-1-tetrahydrofolate synthase, cytoplasmic, C1-THF synthase (Epididymis secretory sperm binding protein) [Cleaved into: C-1-tetrahydrofolate synthase, cytoplasmic, N-terminally processed ] [Includes: Methylenetetrahydrofolate dehydrogenase, EC 1.5.1.5; Methenyltetrahydrofolate cyclohydrolase, EC 3.5.4.9; Formyltetrahydrofolate synthetase, EC 6.3.4.3 ]	MTHFD1 MTHFC MTHFD	+			GOCC							+	36
P61006	RAB8A_HUMAN	Ras-related protein Rab-8A, EC 3.6.5.2 (Oncogene c-mel)	RAB8A MEL RAB8	+			GOCC	+			+		+		36
Q99714	HCD2_HUMAN	3-hydroxyacyl-CoA dehydrogenase type-2, EC 1.1.1.35 (17-beta-estradiol 17-dehydrogenase, EC 1.1.1.62) (2-methyl-3-hydroxybutyryl-CoA dehydrogenase, MHBD) (3-alpha-(17-beta)-hydroxysteroid dehydrogenase (NAD(+)), EC 1.1.1.239) (3-hydroxy-2-methylbutyryl-CoA dehydrogenase, EC 1.1.1.178) (3-hydroxyacyl-CoA dehydrogenase type II) (3alpha(or 20beta)-hydroxysteroid dehydrogenase, EC 1.1.1.53) (7-alpha-…	HSD17B10 ERAB HADH2 MRPP2 SCHAD SDR5C1 XH98G2	+			GOCC	+							35
Q08380	LG3BP_HUMAN	Galectin-3-binding protein (Basement membrane autoantigen p105) (Lectin galactoside-binding soluble 3-binding protein) (Mac-2-binding protein, MAC2BP, Mac-2 BP) (Tumor-associated antigen 90K)	LGALS3BP M2BP	+			GOCC							+	35
P08754	GNAI3_HUMAN	Guanine nucleotide-binding protein G(i) subunit alpha-3 (G(i) alpha-3)	GNAI3	+			GOCC	+					+		35
Q7L1Q6	5MP2_HUMAN	eIF5-mimic protein 2 (Basic leucine zipper and W2 domain-containing protein 1) (Protein Orf)	BZW1 5MP2 BZAP45 KIAA0005	+			GOCC							+	35
P60660	MYL6_HUMAN	Myosin light polypeptide 6 (17 kDa myosin light chain, LC17) (Myosin light chain 3, MLC-3) (Myosin light chain alkali 3, Myosin light chain A3) (Smooth muscle and nonmuscle myosin light chain alkali 6)	MYL6	+			GOCC							+	35
P62269	RS18_HUMAN	40S ribosomal protein S18 (Ke-3, Ke3) (Small ribosomal subunit protein uS13)	RPS18 D6S218E	+			GOCC							+	35
P20340	RAB6A_HUMAN	Ras-related protein Rab-6A, Rab-6	RAB6A RAB6	+			GOCC	+			+	+			35
P12270	TPR_HUMAN	Nucleoprotein TPR (Megator) (NPC-associated intranuclear protein) (Translocated promoter region protein)	TPR	+			GOCC			+					34
Q6NUQ4	TM214_HUMAN	Transmembrane protein 214	TMEM214 PP446	+			GOCC					+			34
P55795	HNRH2_HUMAN	Heterogeneous nuclear ribonucleoprotein H2, hnRNP H2 (FTP-3) (Heterogeneous nuclear ribonucleoprotein H', hnRNP H') [Cleaved into: Heterogeneous nuclear ribonucleoprotein H2, N-terminally processed ]	HNRNPH2 FTP3 HNRPH2	+			GOCC							+	34
P18085	ARF4_HUMAN	ADP-ribosylation factor 4	ARF4 ARF2	+			GOCC	+							34
P61586	RHOA_HUMAN	Transforming protein RhoA, EC 3.6.5.2 (Rho cDNA clone 12, h12)	RHOA ARH12 ARHA RHO12	+			GOCC	+				+			34
P61204	ARF3_HUMAN	ADP-ribosylation factor 3	ARF3	+			GOCC	+			+				34
P23528	COF1_HUMAN	Cofilin-1 (18 kDa phosphoprotein, p18) (Cofilin, non-muscle isoform)	CFL1 CFL	+			GOCC							+	34
P61224	RAP1B_HUMAN	Ras-related protein Rap-1b, EC 3.6.5.2 (GTP-binding protein smg p21B)	RAP1B OK/SW-cl.11	+			GOCC	+							34
P62258	1433E_HUMAN	14-3-3 protein epsilon, 14-3-3E	YWHAE	+			GOCC							+	34
O75643	U520_HUMAN	U5 small nuclear ribonucleoprotein 200 kDa helicase, EC 3.6.4.13 (Activating signal cointegrator 1 complex subunit 3-like 1) (BRR2 homolog) (U5 snRNP-specific 200 kDa protein, U5-200KD)	SNRNP200 ASCC3L1 HELIC2 KIAA0788	+			GOCC							+	33
P84085	ARF5_HUMAN	ADP-ribosylation factor 5	ARF5	+			GOCC	+							33
P61019	RAB2A_HUMAN	Ras-related protein Rab-2A, EC 3.6.5.2	RAB2A RAB2	+			GOCC				+	+	+		33
P36542	ATPG_HUMAN	ATP synthase subunit gamma, mitochondrial (ATP synthase F1 subunit gamma) (F-ATPase gamma subunit)	ATP5F1C ATP5C ATP5C1 ATP5CL1	+			GOCC		+						33
Q15907	RB11B_HUMAN	Ras-related protein Rab-11B, EC 3.6.5.2 (GTP-binding protein YPT3)	RAB11B YPT3	+			GOCC						+		33
Q15286	RAB35_HUMAN	Ras-related protein Rab-35 (GTP-binding protein RAY) (Ras-related protein Rab-1C)	RAB35 RAB1C RAY	+			GOCC	+					+		33
Q9UBB4	ATX10_HUMAN	Ataxin-10 (Brain protein E46 homolog) (Spinocerebellar ataxia type 10 protein)	ATXN10 SCA10	+			GOCC	+							32
P13861	KAP2_HUMAN	cAMP-dependent protein kinase type II-alpha regulatory subunit	PRKAR2A PKR2 PRKAR2	+			GOCC	+							32
O95373	IPO7_HUMAN	Importin-7, Imp7 (Ran-binding protein 7, RanBP7)	IPO7 RANBP7	+			GOCC			+					32
Q96HC4	PDLI5_HUMAN	PDZ and LIM domain protein 5 (Enigma homolog) (Enigma-like PDZ and LIM domains protein)	PDLIM5 ENH L9	+			GOCC							+	32
Q8WUM0	NU133_HUMAN	Nuclear pore complex protein Nup133 (133 kDa nucleoporin) (Nucleoporin Nup133)	NUP133	+			GOCC			+					31
P53621	COPA_HUMAN	Coatomer subunit alpha (Alpha-coat protein, Alpha-COP) (HEP-COP, HEPCOP) [Cleaved into: Xenin (Xenopsin-related peptide); Proxenin ]	COPA	+			GOCC				+	+			31
Q01518	CAP1_HUMAN	Adenylyl cyclase-associated protein 1, CAP 1	CAP1 CAP	+			GOCC	+							31
P11940	PABP1_HUMAN	Polyadenylate-binding protein 1, PABP-1, Poly(A)-binding protein 1	PABPC1 PAB1 PABP PABP1 PABPC2	+			GOCC							+	31
P49748	ACADV_HUMAN	Very long-chain specific acyl-CoA dehydrogenase, mitochondrial, VLCAD, EC 1.3.8.9	ACADVL VLCAD	+			GOCC		+						31
P07737	PROF1_HUMAN	Profilin-1 (Epididymis tissue protein Li 184a) (Profilin I)	PFN1	+			GOCC							+	31
Q92841	DDX17_HUMAN	Probable ATP-dependent RNA helicase DDX17, EC 3.6.4.13 (DEAD box protein 17) (DEAD box protein p72) (DEAD box protein p82) (RNA-dependent helicase p72)	DDX17	+			GOCC							+	31
P05186	PPBT_HUMAN	Alkaline phosphatase, tissue-nonspecific isozyme, AP-TNAP, TNS-ALP, TNSALP, EC 3.1.3.1 (Alkaline phosphatase liver/bone/kidney isozyme) (Phosphoamidase) (Phosphocreatine phosphatase, EC 3.9.1.1)	ALPL	+			GOCC	+	+						30
O00567	NOP56_HUMAN	Nucleolar protein 56 (Nucleolar protein 5A)	NOP56 NOL5A	+			GOCC							+	30
P12268	IMDH2_HUMAN	Inosine-5'-monophosphate dehydrogenase 2, IMP dehydrogenase 2, IMPD 2, IMPDH 2, EC 1.1.1.205 (Inosine-5'-monophosphate dehydrogenase type II, IMP dehydrogenase II, IMPDH-II)	IMPDH2 IMPD2	+			GOCC						+		30
P61020	RAB5B_HUMAN	Ras-related protein Rab-5B, EC 3.6.5.2	RAB5B	+			GOCC	+					+		30
P10606	COX5B_HUMAN	Cytochrome c oxidase subunit 5B, mitochondrial (Cytochrome c oxidase polypeptide Vb)	COX5B	+			GOCC		+						30
Q07020	RL18_HUMAN	60S ribosomal protein L18 (Large ribosomal subunit protein eL18)	RPL18	+			GOCC							+	30
Q02543	RL18A_HUMAN	60S ribosomal protein L18a (Large ribosomal subunit protein eL20)	RPL18A	+			GOCC							+	30
Q9Y230	RUVB2_HUMAN	RuvB-like 2, EC 3.6.4.12 (48 kDa TATA box-binding protein-interacting protein, 48 kDa TBP-interacting protein) (51 kDa erythrocyte cytosolic protein, ECP-51) (INO80 complex subunit J) (Repressing pontin 52, Reptin 52) (TIP49b) (TIP60-associated protein 54-beta, TAP54-beta)	RUVBL2 INO80J TIP48 TIP49B CGI-46	+			GOCC							+	29
P62937	PPIA_HUMAN	Peptidyl-prolyl cis-trans isomerase A, PPIase A, EC 5.2.1.8 (Cyclophilin A) (Cyclosporin A-binding protein) (Rotamase A) [Cleaved into: Peptidyl-prolyl cis-trans isomerase A, N-terminally processed ]	PPIA CYPA	+			GOCC							+	29
P30153	2AAA_HUMAN	Serine/threonine-protein phosphatase 2A 65 kDa regulatory subunit A alpha isoform (Medium tumor antigen-associated 61 kDa protein) (PP2A subunit A isoform PR65-alpha) (PP2A subunit A isoform R1-alpha)	PPP2R1A	+			GOCC	+							29
Q96AC1	FERM2_HUMAN	Fermitin family homolog 2 (Kindlin-2) (Mitogen-inducible gene 2 protein, MIG-2) (Pleckstrin homology domain-containing family C member 1, PH domain-containing family C member 1)	FERMT2 KIND2 MIG2 PLEKHC1	+			GOCC	+							29
P46782	RS5_HUMAN	40S ribosomal protein S5 (Small ribosomal subunit protein uS7) [Cleaved into: 40S ribosomal protein S5, N-terminally processed ]	RPS5	+			GOCC							+	29
P47712	PA24A_HUMAN	Cytosolic phospholipase A2, cPLA2 (Phospholipase A2 group IVA) [Includes: Phospholipase A2, EC 3.1.1.4 (Phosphatidylcholine 2-acylhydrolase); Lysophospholipase, EC 3.1.1.5 ]	PLA2G4A CPLA2 PLA2G4	+			GOCC		+	+	+	+			29
Q13637	RAB32_HUMAN	Ras-related protein Rab-32	RAB32	+			GOCC		+			+	+		29
Q70UQ0	IKIP_HUMAN	Inhibitor of nuclear factor kappa-B kinase-interacting protein, I kappa-B kinase-interacting protein, IKBKB-interacting protein, IKK-interacting protein	IKBIP IKIP	+			GOCC					+			29
P46779	RL28_HUMAN	60S ribosomal protein L28 (Large ribosomal subunit protein eL28)	RPL28	+			GOCC							+	29
P52292	IMA1_HUMAN	Importin subunit alpha-1 (Karyopherin subunit alpha-2) (RAG cohort protein 1) (SRP1-alpha)	KPNA2 RCH1 SRP1	+			GOCC				+	+			28
O00165	HAX1_HUMAN	HCLS1-associated protein X-1 (HS1-associating protein X-1, HAX-1) (HS1-binding protein 1, HSP1BP-1)	HAX1 HS1BP1	+			GOCC	+	+	+					28
Q15019	SEPT2_HUMAN	Septin-2 (Neural precursor cell expressed developmentally down-regulated protein 5, NEDD-5)	SEPTIN2 DIFF6 KIAA0158 NEDD5 SEPT2	+			GOCC	+							28
P19338	NUCL_HUMAN	Nucleolin (Protein C23)	NCL	+			GOCC							+	28
P51571	SSRD_HUMAN	Translocon-associated protein subunit delta, TRAP-delta (Signal sequence receptor subunit delta, SSR-delta)	SSR4 TRAPD	+			GOCC							+	28
P31946	1433B_HUMAN	14-3-3 protein beta/alpha (Protein 1054) (Protein kinase C inhibitor protein 1, KCIP-1) [Cleaved into: 14-3-3 protein beta/alpha, N-terminally processed ]	YWHAB	+			GOCC							+	28
P07910	HNRPC_HUMAN	Heterogeneous nuclear ribonucleoproteins C1/C2, hnRNP C1/C2	HNRNPC HNRPC	+			GOCC							+	28
P46781	RS9_HUMAN	40S ribosomal protein S9 (Small ribosomal subunit protein uS4)	RPS9	+			GOCC							+	28
P28290	ITPI2_HUMAN	Protein ITPRID2 (Cleavage signal-1 protein, CS-1) (ITPR-interacting domain-containing protein 2) (Ki-ras-induced actin-interacting protein) (Sperm-specific antigen 2)	ITPRID2 CS1 KIAA1927 KRAP SSFA2	+			GOCC	+							27
P04083	ANXA1_HUMAN	Annexin A1 (Annexin I) (Annexin-1) (Calpactin II) (Calpactin-2) (Chromobindin-9) (Lipocortin I) (Phospholipase A2 inhibitory protein) (p35) [Cleaved into: Annexin Ac2-26 ]	ANXA1 ANX1 LPC1	+			GOCC	+					+		27
P57740	NU107_HUMAN	Nuclear pore complex protein Nup107 (107 kDa nucleoporin) (Nucleoporin Nup107)	NUP107	+			GOCC			+					27
P52597	HNRPF_HUMAN	Heterogeneous nuclear ribonucleoprotein F, hnRNP F (Nucleolin-like protein mcs94-1) [Cleaved into: Heterogeneous nuclear ribonucleoprotein F, N-terminally processed ]	HNRNPF HNRPF	+			GOCC	+							27
P06733	ENOA_HUMAN	Alpha-enolase, EC 4.2.1.11 (2-phospho-D-glycerate hydro-lyase) (C-myc promoter-binding protein) (Enolase 1) (MBP-1) (MPB-1) (Non-neural enolase, NNE) (Phosphopyruvate hydratase) (Plasminogen-binding protein)	ENO1 ENO1L1 MBPB1 MPB1	+			GOCC	+		+					27
P62834	RAP1A_HUMAN	Ras-related protein Rap-1A, EC 3.6.5.2 (C21KG) (G-22K) (GTP-binding protein smg p21A) (Ras-related protein Krev-1)	RAP1A KREV1	+			GOCC	+					+		27
P61981	1433G_HUMAN	14-3-3 protein gamma (Protein kinase C inhibitor protein 1, KCIP-1) [Cleaved into: 14-3-3 protein gamma, N-terminally processed ]	YWHAG	+			GOCC							+	27
P63096	GNAI1_HUMAN	Guanine nucleotide-binding protein G(i) subunit alpha-1 (Adenylate cyclase-inhibiting G alpha protein)	GNAI1	+			GOCC	+					+		27
Q96AY3	FKB10_HUMAN	Peptidyl-prolyl cis-trans isomerase FKBP10, PPIase FKBP10, EC 5.2.1.8 (65 kDa FK506-binding protein, 65 kDa FKBP, FKBP-65) (FK506-binding protein 10, FKBP-10) (Immunophilin FKBP65) (Rotamase)	FKBP10 FKBP65 PSEC0056	+			GOCC							+	27
P62873	GBB1_HUMAN	Guanine nucleotide-binding protein G(I)/G(S)/G(T) subunit beta-1 (Transducin beta chain 1)	GNB1	+			GOCC	+					+		26
Q6P2Q9	PRP8_HUMAN	Pre-mRNA-processing-splicing factor 8 (220 kDa U5 snRNP-specific protein) (PRP8 homolog) (Splicing factor Prp8) (p220)	PRPF8 PRPC8	+			GOCC							+	26
O43615	TIM44_HUMAN	Mitochondrial import inner membrane translocase subunit TIM44	TIMM44 MIMT44 TIM44	+			GOCC		+						26
P53007	TXTP_HUMAN	Tricarboxylate transport protein, mitochondrial (Citrate transport protein, CTP) (Solute carrier family 25 member 1) (Tricarboxylate carrier protein)	SLC25A1 SLC20A3	+			GOCC		+						26
Q04637	IF4G1_HUMAN	Eukaryotic translation initiation factor 4 gamma 1, eIF-4-gamma 1, eIF-4G 1, eIF-4G1 (p220)	EIF4G1 EIF4F EIF4G EIF4GI	+			GOCC							+	25
P63010	AP2B1_HUMAN	AP-2 complex subunit beta (AP105B) (Adaptor protein complex AP-2 subunit beta) (Adaptor-related protein complex 2 subunit beta) (Beta-2-adaptin) (Beta-adaptin) (Clathrin assembly protein complex 2 beta large chain) (Plasma membrane adaptor HA2/AP2 adaptin beta subunit)	AP2B1 ADTB2 CLAPB1	+			GOCC	+					+		25
P17812	PYRG1_HUMAN	CTP synthase 1, EC 6.3.4.2 (CTP synthetase 1) (UTP--ammonia ligase 1)	CTPS1 CTPS	+			GOCC							+	25
O60762	DPM1_HUMAN	Dolichol-phosphate mannosyltransferase subunit 1, EC 2.4.1.83 (Dolichol-phosphate mannose synthase subunit 1, DPM synthase subunit 1) (Dolichyl-phosphate beta-D-mannosyltransferase subunit 1) (Mannose-P-dolichol synthase subunit 1, MPD synthase subunit 1)	DPM1	+			GOCC					+			25
P11413	G6PD_HUMAN	Glucose-6-phosphate 1-dehydrogenase, G6PD, EC 1.1.1.49	G6PD	+			GOCC	+							25
P20674	COX5A_HUMAN	Cytochrome c oxidase subunit 5A, mitochondrial (Cytochrome c oxidase polypeptide Va)	COX5A	+			GOCC		+						25
Q92616	GCN1_HUMAN	eIF-2-alpha kinase activator GCN1 (GCN1 eIF-2-alpha kinase activator homolog) (GCN1-like protein 1) (General control of amino-acid synthesis 1-like protein 1) (Translational activator GCN1, HsGCN1)	GCN1 GCN1L1 KIAA0219	+			GOCC							+	24
P27708	PYR1_HUMAN	CAD protein [Includes: Glutamine-dependent carbamoyl-phosphate synthase, EC 6.3.5.5; Aspartate carbamoyltransferase, EC 2.1.3.2; Dihydroorotase, EC 3.5.2.3 ]	CAD	+			GOCC							+	24
P09651	ROA1_HUMAN	Heterogeneous nuclear ribonucleoprotein A1, hnRNP A1 (Helix-destabilizing protein) (Single-strand RNA-binding protein) (hnRNP core protein A1) [Cleaved into: Heterogeneous nuclear ribonucleoprotein A1, N-terminally processed ]	HNRNPA1 HNRPA1	+			GOCC							+	24
Q14677	EPN4_HUMAN	Clathrin interactor 1 (Clathrin-interacting protein localized in the trans-Golgi region, Clint) (Enthoprotin) (Epsin-4) (Epsin-related protein, EpsinR)	CLINT1 ENTH EPN4 EPNR KIAA0171	+			GOCC	+							24
Q16795	NDUA9_HUMAN	NADH dehydrogenase [ubiquinone] 1 alpha subcomplex subunit 9, mitochondrial (Complex I-39kD, CI-39kD) (NADH-ubiquinone oxidoreductase 39 kDa subunit)	NDUFA9 NDUFS2L	+			GOCC		+						24
P14854	CX6B1_HUMAN	Cytochrome c oxidase subunit 6B1 (Cytochrome c oxidase subunit VIb isoform 1, COX VIb-1)	COX6B1 COX6B	+			GOCC		+						24
P20339	RAB5A_HUMAN	Ras-related protein Rab-5A, EC 3.6.5.2	RAB5A RAB5	+			GOCC	+					+		24
P84098	RL19_HUMAN	60S ribosomal protein L19 (Large ribosomal subunit protein eL19)	RPL19	+			GOCC							+	24
P62987	RL40_HUMAN	Ubiquitin-60S ribosomal protein L40 (CEP52) (Ubiquitin A-52 residue ribosomal protein fusion product 1) [Cleaved into: Ubiquitin; 60S ribosomal protein L40 (Large ribosomal subunit protein eL40) ]	UBA52 UBCEP2	+			GOCC	+	+			+	+		24
Q9Y276	BCS1_HUMAN	Mitochondrial chaperone BCS1, h-BCS1 (BCS1-like protein)	BCS1L BCS1	+			GOCC		+						23
Q92499	DDX1_HUMAN	ATP-dependent RNA helicase DDX1, EC 3.6.4.13 (DEAD box protein 1) (DEAD box protein retinoblastoma, DBP-RB)	DDX1	+			GOCC							+	23
Q96TA2	YMEL1_HUMAN	ATP-dependent zinc metalloprotease YME1L1, EC 3.4.24.- (ATP-dependent metalloprotease FtsH1) (Meg-4) (Presenilin-associated metalloprotease, PAMP) (YME1-like protein 1)	YME1L1 FTSH1 YME1L UNQ1868/PRO4304	+			GOCC		+						23
O60664	PLIN3_HUMAN	Perilipin-3 (47 kDa mannose 6-phosphate receptor-binding protein, 47 kDa MPR-binding protein) (Cargo selection protein TIP47) (Mannose-6-phosphate receptor-binding protein 1) (Placental protein 17, PP17)	PLIN3 M6PRBP1 TIP47	+			GOCC						+		23
Q9H845	ACAD9_HUMAN	Complex I assembly factor ACAD9, mitochondrial (Acyl-CoA dehydrogenase family member 9, ACAD-9, EC 1.3.8.-)	ACAD9	+			GOCC		+						23
P04632	CPNS1_HUMAN	Calpain small subunit 1, CSS1 (Calcium-activated neutral proteinase small subunit, CANP small subunit) (Calcium-dependent protease small subunit, CDPS) (Calcium-dependent protease small subunit 1) (Calpain regulatory subunit)	CAPNS1 CAPN4 CAPNS	+			GOCC	+							23
P08134	RHOC_HUMAN	Rho-related GTP-binding protein RhoC (Rho cDNA clone 9, h9)	RHOC ARH9 ARHC	+			GOCC	+				+			23
P62879	GBB2_HUMAN	Guanine nucleotide-binding protein G(I)/G(S)/G(T) subunit beta-2 (G protein subunit beta-2) (Transducin beta chain 2)	GNB2	+			GOCC	+					+		23
P06858	LIPL_HUMAN	Lipoprotein lipase, LPL, EC 3.1.1.34 (Phospholipase A1, EC 3.1.1.32)	LPL LIPD	+			GOCC	+							23
O96000	NDUBA_HUMAN	NADH dehydrogenase [ubiquinone] 1 beta subcomplex subunit 10 (Complex I-PDSW, CI-PDSW) (NADH-ubiquinone oxidoreductase PDSW subunit)	NDUFB10	+			GOCC		+						23
P60953	CDC42_HUMAN	Cell division control protein 42 homolog, EC 3.6.5.2 (G25K GTP-binding protein)	CDC42	+			GOCC	+			+	+			23
O75340	PDCD6_HUMAN	Programmed cell death protein 6 (Apoptosis-linked gene 2 protein homolog, ALG-2)	PDCD6 ALG2	+			GOCC					+			23
P68431	H31_HUMAN	Histone H3.1 (Histone H3/a) (Histone H3/b) (Histone H3/c) (Histone H3/d) (Histone H3/f) (Histone H3/h) (Histone H3/i) (Histone H3/j) (Histone H3/k) (Histone H3/l)	H3C1 H3FA HIST1H3A; H3C2 H3FL HIST1H3B; H3C3 H3FC HIST1H3C; H3C4 H3FB HIST1H3D; H3C6 H3FD HIST1H3E; H3C7 H3FI HIST1H3F; H3C8 H3FH HIST1H3G; H3C10 H3FK HIST1H3H; H3C11 H3FF HIST1H3I; H3C12 H3FJ HIST1H3J	+			GOCC							+	23
P22234	PUR6_HUMAN	Bifunctional phosphoribosylaminoimidazole carboxylase/phosphoribosylaminoimidazole succinocarboxamide synthetase, PAICS [Includes: Phosphoribosylaminoimidazole carboxylase, EC 4.1.1.21 (AIR carboxylase, AIRC); Phosphoribosylaminoimidazole succinocarboxamide synthetase, EC 6.3.2.6 (SAICAR synthetase) ]	PAICS ADE2 AIRC PAIS	+			GOCC							+	23
O00116	ADAS_HUMAN	Alkyldihydroxyacetonephosphate synthase, peroxisomal, Alkyl-DHAP synthase, EC 2.5.1.26 (Aging-associated gene 5 protein) (Alkylglycerone-phosphate synthase)	AGPS AAG5	+			GOCC						+		22
Q16134	ETFD_HUMAN	Electron transfer flavoprotein-ubiquinone oxidoreductase, mitochondrial, ETF-QO, ETF-ubiquinone oxidoreductase, EC 1.5.5.1 (Electron-transferring-flavoprotein dehydrogenase, ETF dehydrogenase)	ETFDH	+			GOCC		+						22
Q9H583	HEAT1_HUMAN	HEAT repeat-containing protein 1 (Protein BAP28) (U3 small nucleolar RNA-associated protein 10 homolog) [Cleaved into: HEAT repeat-containing protein 1, N-terminally processed ]	HEATR1 BAP28 UTP10	+			GOCC							+	22
Q9NRG9	AAAS_HUMAN	Aladin (Adracalin)	AAAS ADRACALA GL003	+			GOCC			+					22
Q8NBU5	ATAD1_HUMAN	Outer mitochondrial transmembrane helix translocase, EC 7.4.2.- (ATPase family AAA domain-containing protein 1, hATAD1) (Thorase)	ATAD1 FNP001	+			GOCC		+				+		22
P10515	ODP2_HUMAN	Dihydrolipoyllysine-residue acetyltransferase component of pyruvate dehydrogenase complex, mitochondrial, EC 2.3.1.12 (70 kDa mitochondrial autoantigen of primary biliary cirrhosis, PBC) (Dihydrolipoamide acetyltransferase component of pyruvate dehydrogenase complex) (M2 antigen complex 70 kDa subunit) (Pyruvate dehydrogenase complex component E2, PDC-E2, PDCE2)	DLAT DLTA	+			GOCC							+	22
O00303	EIF3F_HUMAN	Eukaryotic translation initiation factor 3 subunit F, eIF3f (Deubiquitinating enzyme eIF3f, EC 3.4.19.12) (Eukaryotic translation initiation factor 3 subunit 5) (eIF-3-epsilon) (eIF3 p47)	EIF3F EIF3S5	+			GOCC							+	22
P38606	VATA_HUMAN	V-type proton ATPase catalytic subunit A, V-ATPase subunit A, EC 7.1.2.2 (V-ATPase 69 kDa subunit) (Vacuolar ATPase isoform VA68) (Vacuolar proton pump subunit alpha)	ATP6V1A ATP6A1 ATP6V1A1 VPP2	+			GOCC	+			+		+		22
P52948	NUP98_HUMAN	Nuclear pore complex protein Nup98-Nup96, EC 3.4.21.- [Cleaved into: Nuclear pore complex protein Nup98 (98 kDa nucleoporin) (Nucleoporin Nup98, Nup98); Nuclear pore complex protein Nup96 (96 kDa nucleoporin) (Nucleoporin Nup96, Nup96) ]	NUP98 ADAR2	+			GOCC			+					22
P51970	NDUA8_HUMAN	NADH dehydrogenase [ubiquinone] 1 alpha subcomplex subunit 8 (Complex I-19kD, CI-19kD) (Complex I-PGIV, CI-PGIV) (NADH-ubiquinone oxidoreductase 19 kDa subunit)	NDUFA8	+			GOCC		+						22
O95831	AIFM1_HUMAN	Apoptosis-inducing factor 1, mitochondrial, EC 1.6.99.- (Programmed cell death protein 8)	AIFM1 AIF PDCD8	+			GOCC		+						22
P07919	QCR6_HUMAN	Cytochrome b-c1 complex subunit 6, mitochondrial (Complex III subunit 6) (Complex III subunit VIII) (Cytochrome c1 non-heme 11 kDa protein) (Mitochondrial hinge protein) (Ubiquinol-cytochrome c reductase complex 11 kDa protein)	UQCRH	+			GOCC		+						22
Q9NX40	OCAD1_HUMAN	OCIA domain-containing protein 1 (Ovarian cancer immunoreactive antigen domain containing 1) (Ovarian carcinoma immunoreactive antigen)	OCIAD1 ASRIJ OCIA	+			GOCC							+	22
P27635	RL10_HUMAN	60S ribosomal protein L10 (Laminin receptor homolog) (Large ribosomal subunit protein uL16) (Protein QM) (Ribosomal protein L10) (Tumor suppressor QM)	RPL10 DXS648E QM	+			GOCC							+	22
Q96I24	FUBP3_HUMAN	Far upstream element-binding protein 3, FUSE-binding protein 3	FUBP3 FBP3	+			GOCC							+	21
Q99439	CNN2_HUMAN	Calponin-2 (Calponin H2, smooth muscle) (Neutral calponin)	CNN2	+			GOCC							+	21
O60684	IMA7_HUMAN	Importin subunit alpha-7 (Karyopherin subunit alpha-6)	KPNA6 IPOA7	+			GOCC							+	21
Q9UL25	RAB21_HUMAN	Ras-related protein Rab-21	RAB21 KIAA0118	+			GOCC	+			+	+	+		21
P17655	CAN2_HUMAN	Calpain-2 catalytic subunit, EC 3.4.22.53 (Calcium-activated neutral proteinase 2, CANP 2) (Calpain M-type) (Calpain large polypeptide L2) (Calpain-2 large subunit) (Millimolar-calpain, M-calpain)	CAPN2 CANPL2	+			GOCC	+							21
Q9UMS4	PRP19_HUMAN	Pre-mRNA-processing factor 19, EC 2.3.2.27 (Nuclear matrix protein 200) (PRP19/PSO4 homolog, hPso4) (RING-type E3 ubiquitin transferase PRP19) (Senescence evasion factor)	PRPF19 NMP200 PRP19 SNEV	+			GOCC							+	21
P53618	COPB_HUMAN	Coatomer subunit beta (Beta-coat protein, Beta-COP)	COPB1 COPB MSTP026	+			GOCC	+			+	+			21
P62241	RS8_HUMAN	40S ribosomal protein S8 (Small ribosomal subunit protein eS8)	RPS8 OK/SW-cl.83	+			GOCC							+	21
P61313	RL15_HUMAN	60S ribosomal protein L15 (Large ribosomal subunit protein eL15)	RPL15 EC45 TCBAP0781	+			GOCC							+	21
P56385	ATP5I_HUMAN	ATP synthase subunit e, mitochondrial, ATPase subunit e (ATP synthase membrane subunit e) [Cleaved into: ATP synthase subunit e, mitochondrial, N-terminally processed ]	ATP5ME ATP5I ATP5K	+			GOCC		+						21
P33897	ABCD1_HUMAN	ATP-binding cassette sub-family D member 1, EC 3.1.2.-, EC 7.6.2.- (Adrenoleukodystrophy protein, ALDP)	ABCD1 ALD	+			GOCC		+			+	+		20
P14866	HNRPL_HUMAN	Heterogeneous nuclear ribonucleoprotein L, hnRNP L	HNRNPL HNRPL P/OKcl.14	+			GOCC							+	20
O60763	USO1_HUMAN	General vesicular transport factor p115 (Protein USO1 homolog) (Transcytosis-associated protein, TAP) (Vesicle-docking protein)	USO1 VDP	+			GOCC				+		+		20
Q8WX93	PALLD_HUMAN	Palladin (SIH002) (Sarcoma antigen NY-SAR-77)	PALLD KIAA0992 CGI-151	+			GOCC	+							20
P29401	TKT_HUMAN	Transketolase, TK, EC 2.2.1.1	TKT	+			GOCC					+			20
P07602	SAP_HUMAN	Prosaposin (Proactivator polypeptide) [Cleaved into: Saposin-A (Protein A); Saposin-B-Val; Saposin-B (Cerebroside sulfate activator, CSAct) (Dispersin) (Sphingolipid activator protein 1, SAP-1) (Sulfatide/GM1 activator); Saposin-C (A1 activator) (Co-beta-glucosidase) (Glucosylceramidase activator) (Sphingolipid activator protein 2, SAP-2); Saposin-D (Component C) (Protein C) ]	PSAP GLBA SAP1	+			GOCC	+					+		20
Q13492	PICAL_HUMAN	Phosphatidylinositol-binding clathrin assembly protein (Clathrin assembly lymphoid myeloid leukemia protein)	PICALM CALM	+			GOCC	+							20
P14314	GLU2B_HUMAN	Glucosidase 2 subunit beta (80K-H protein) (Glucosidase II subunit beta) (Protein kinase C substrate 60.1 kDa protein heavy chain, PKCSH)	PRKCSH G19P1	+			GOCC							+	20
P30041	PRDX6_HUMAN	Peroxiredoxin-6, EC 1.11.1.27 (1-Cys peroxiredoxin, 1-Cys PRX) (24 kDa protein) (Acidic calcium-independent phospholipase A2, aiPLA2, EC 3.1.1.4) (Antioxidant protein 2) (Glutathione-dependent peroxiredoxin) (Liver 2D page spot 40) (Lysophosphatidylcholine acyltransferase 5, LPC acyltransferase 5, LPCAT-5, Lyso-PC acyltransferase 5, EC 2.3.1.23) (Non-selenium glutathione peroxidase, NSGPx) (Red b…	PRDX6 AOP2 KIAA0106	+			GOCC							+	20
Q9BZE4	GTPB4_HUMAN	GTP-binding protein 4 (Chronic renal failure gene protein) (GTP-binding protein NGB) (Nucleolar GTP-binding protein 1)	GTPBP4 CRFG NOG1	+			GOCC			+					20
Q14254	FLOT2_HUMAN	Flotillin-2 (Epidermal surface antigen, ESA) (Membrane component chromosome 17 surface marker 1)	FLOT2 ESA1 M17S1	+			GOCC	+							20
P31040	SDHA_HUMAN	Succinate dehydrogenase [ubiquinone] flavoprotein subunit, mitochondrial, EC 1.3.5.1 (Flavoprotein subunit of complex II, Fp)	SDHA SDH2 SDHF	+			GOCC		+						19
Q6UXV4	MIC27_HUMAN	MICOS complex subunit MIC27 (Apolipoprotein O-like) (Protein FAM121A)	APOOL CXorf33 FAM121A MIC27 UNQ8193/PRO23204	+			GOCC		+						19
P62195	PRS8_HUMAN	26S proteasome regulatory subunit 8 (26S proteasome AAA-ATPase subunit RPT6) (Proteasome 26S subunit ATPase 5) (Proteasome subunit p45) (Thyroid hormone receptor-interacting protein 1, TRIP1) (p45/SUG)	PSMC5 SUG1	+			GOCC							+	19
P32969	RL9_HUMAN	60S ribosomal protein L9 (Large ribosomal subunit protein uL6)	RPL9 OK/SW-cl.103; RPL9P7; RPL9P8; RPL9P9	+			GOCC							+	19
P06396	GELS_HUMAN	Gelsolin (AGEL) (Actin-depolymerizing factor, ADF) (Brevin)	GSN	+			GOCC	+							19
Q15233	NONO_HUMAN	Non-POU domain-containing octamer-binding protein, NonO protein (54 kDa nuclear RNA- and DNA-binding protein, p54(nrb), p54nrb) (55 kDa nuclear protein, NMT55) (DNA-binding p52/p100 complex, 52 kDa subunit)	NONO NRB54	+			GOCC							+	19
P13987	CD59_HUMAN	CD59 glycoprotein (1F5 antigen) (20 kDa homologous restriction factor, HRF-20, HRF20) (MAC-inhibitory protein, MAC-IP) (MEM43 antigen) (Membrane attack complex inhibition factor, MACIF) (Membrane inhibitor of reactive lysis, MIRL) (Protectin) (CD antigen CD59)	CD59 MIC11 MIN1 MIN2 MIN3 MSK21	+			GOCC	+			+	+	+		19
P62753	RS6_HUMAN	40S ribosomal protein S6 (Phosphoprotein NP33) (Small ribosomal subunit protein eS6)	RPS6 OK/SW-cl.2	+			GOCC							+	19
P62913	RL11_HUMAN	60S ribosomal protein L11 (CLL-associated antigen KW-12) (Large ribosomal subunit protein uL5)	RPL11	+			GOCC							+	19
Q13636	RAB31_HUMAN	Ras-related protein Rab-31 (Ras-related protein Rab-22B)	RAB31 RAB22B	+			GOCC	+					+		18
Q12905	ILF2_HUMAN	Interleukin enhancer-binding factor 2 (Nuclear factor of activated T-cells 45 kDa)	ILF2 NF45 PRO3063	+			GOCC							+	18
P55084	ECHB_HUMAN	Trifunctional enzyme subunit beta, mitochondrial (TP-beta) [Includes: 3-ketoacyl-CoA thiolase, EC 2.3.1.155, EC 2.3.1.16 (Acetyl-CoA acyltransferase) (Beta-ketothiolase) ]	HADHB MSTP029	+			GOCC		+						18
Q9NR30	DDX21_HUMAN	Nucleolar RNA helicase 2, EC 3.6.4.13 (DEAD box protein 21) (Gu-alpha) (Nucleolar RNA helicase Gu) (Nucleolar RNA helicase II) (RH II/Gu)	DDX21	+			GOCC							+	18
Q10567	AP1B1_HUMAN	AP-1 complex subunit beta-1 (Adaptor protein complex AP-1 subunit beta-1) (Adaptor-related protein complex 1 subunit beta-1) (Beta-1-adaptin) (Beta-adaptin 1) (Clathrin assembly protein complex 1 beta large chain) (Golgi adaptor HA1/AP1 adaptin beta subunit)	AP1B1 ADTB1 BAM22 CLAPB2	+			GOCC				+		+		18
P50914	RL14_HUMAN	60S ribosomal protein L14 (CAG-ISL 7) (Large ribosomal subunit protein eL14)	RPL14	+			GOCC							+	18
O14949	QCR8_HUMAN	Cytochrome b-c1 complex subunit 8 (Complex III subunit 8) (Complex III subunit VIII) (Ubiquinol-cytochrome c reductase complex 9.5 kDa protein) (Ubiquinol-cytochrome c reductase complex ubiquinone-binding protein QP-C)	UQCRQ	+			GOCC		+						18
O95716	RAB3D_HUMAN	Ras-related protein Rab-3D	RAB3D GOV RAB16	+			GOCC	+							18
P51153	RAB13_HUMAN	Ras-related protein Rab-13 (Cell growth-inhibiting gene 4 protein)	RAB13 GIG4	+			GOCC	+					+		18
P02751	FINC_HUMAN	Fibronectin, FN (Cold-insoluble globulin, CIG) [Cleaved into: Anastellin; Ugl-Y1; Ugl-Y2; Ugl-Y3 ]	FN1 FN	+			GOCC	+			+	+			17
P84095	RHOG_HUMAN	Rho-related GTP-binding protein RhoG	RHOG ARHG	+			GOCC	+				+			17
O75381	PEX14_HUMAN	Peroxisomal membrane protein PEX14 (PTS1 receptor-docking protein) (Peroxin-14) (Peroxisomal membrane anchor protein PEX14)	PEX14	+			GOCC						+		17
P47756	CAPZB_HUMAN	F-actin-capping protein subunit beta (CapZ beta)	CAPZB	+			GOCC							+	17
P62826	RAN_HUMAN	GTP-binding nuclear protein Ran, EC 3.6.5.- (Androgen receptor-associated protein 24) (GTPase Ran) (Ras-like protein TC4) (Ras-related nuclear protein)	RAN ARA24 OK/SW-cl.81	+			GOCC			+					17
P63000	RAC1_HUMAN	Ras-related C3 botulinum toxin substrate 1, EC 3.6.5.2 (Cell migration-inducing gene 5 protein) (Ras-like protein TC25) (p21-Rac1)	RAC1 TC25 MIG5	+			GOCC	+				+	+		17
P06493	CDK1_HUMAN	Cyclin-dependent kinase 1, CDK1, EC 2.7.11.22, EC 2.7.11.23 (Cell division control protein 2 homolog) (Cell division protein kinase 1) (p34 protein kinase)	CDK1 CDC2 CDC28A CDKN1 P34CDC2	+			GOCC					+			17
P62910	RL32_HUMAN	60S ribosomal protein L32 (Large ribosomal subunit protein eL32)	RPL32 PP9932	+			GOCC							+	17
P62917	RL8_HUMAN	60S ribosomal protein L8 (Large ribosomal subunit protein uL2)	RPL8	+			GOCC							+	17
Q04917	1433F_HUMAN	14-3-3 protein eta (Protein AS1)	YWHAH YWHA1	+			GOCC	+							17
P17931	LEG3_HUMAN	Galectin-3, Gal-3 (35 kDa lectin) (Carbohydrate-binding protein 35, CBP 35) (Galactose-specific lectin 3) (Galactoside-binding protein, GALBP) (IgE-binding protein) (L-31) (Laminin-binding protein) (Lectin L-29) (Mac-2 antigen)	LGALS3 MAC2	+			GOCC	+	+						17
P62249	RS16_HUMAN	40S ribosomal protein S16 (Small ribosomal subunit protein uS9)	RPS16	+			GOCC							+	17
P17980	PRS6A_HUMAN	26S proteasome regulatory subunit 6A (26S proteasome AAA-ATPase subunit RPT5) (Proteasome 26S subunit ATPase 3) (Proteasome subunit P50) (Tat-binding protein 1, TBP-1)	PSMC3 TBP1	+			GOCC							+	16
Q13501	SQSTM_HUMAN	Sequestosome-1 (EBI3-associated protein of 60 kDa, EBIAP, p60) (Phosphotyrosine-independent ligand for the Lck SH2 domain of 62 kDa) (Ubiquitin-binding protein p62)	SQSTM1 ORCA OSIL	+			GOCC							+	16
P08865	RSSA_HUMAN	40S ribosomal protein SA (37 kDa laminin receptor precursor, 37LRP) (37/67 kDa laminin receptor, LRP/LR) (67 kDa laminin receptor, 67LR) (Colon carcinoma laminin-binding protein) (Laminin receptor 1, LamR) (Laminin-binding protein precursor p40, LBP/p40) (Multidrug resistance-associated protein MGr1-Ag) (NEM/1CHD4) (Small ribosomal subunit protein uS2)	RPSA LAMBR LAMR1	+			GOCC	+							16
O60884	DNJA2_HUMAN	DnaJ homolog subfamily A member 2 (Cell cycle progression restoration gene 3 protein) (Dnj3, Dj3) (HIRA-interacting protein 4) (Renal carcinoma antigen NY-REN-14)	DNAJA2 CPR3 HIRIP4	+			GOCC							+	16
Q9Y265	RUVB1_HUMAN	RuvB-like 1, EC 3.6.4.12 (49 kDa TATA box-binding protein-interacting protein, 49 kDa TBP-interacting protein) (54 kDa erythrocyte cytosolic protein, ECP-54) (INO80 complex subunit H) (Nuclear matrix protein 238, NMP 238) (Pontin 52) (TIP49a) (TIP60-associated protein 54-alpha, TAP54-alpha)	RUVBL1 INO80H NMP238 TIP49 TIP49A	+			GOCC							+	16
P15531	NDKA_HUMAN	Nucleoside diphosphate kinase A, NDK A, NDP kinase A, EC 2.7.4.6 (Granzyme A-activated DNase, GAAD) (Metastasis inhibition factor nm23) (NM23-H1) (Tumor metastatic process-associated protein)	NME1 NDPKA NM23	+			GOCC							+	16
P55209	NP1L1_HUMAN	Nucleosome assembly protein 1-like 1 (NAP-1-related protein, hNRP)	NAP1L1 NRP	+			GOCC							+	16
Q9UBI6	GBG12_HUMAN	Guanine nucleotide-binding protein G(I)/G(S)/G(O) subunit gamma-12	GNG12	+			GOCC	+							16
P55735	SEC13_HUMAN	Protein SEC13 homolog (GATOR complex protein SEC13) (SEC13-like protein 1) (SEC13-related protein)	SEC13 D3S1231E SEC13A SEC13L1 SEC13R	+			GOCC			+		+	+		15
Q9BW27	NUP85_HUMAN	Nuclear pore complex protein Nup85 (85 kDa nucleoporin) (FROUNT) (Nucleoporin Nup75) (Nucleoporin Nup85) (Pericentrin-1)	NUP85 NUP75 PCNT1	+			GOCC			+					15
P00734	THRB_HUMAN	Prothrombin, EC 3.4.21.5 (Coagulation factor II) [Cleaved into: Activation peptide fragment 1; Activation peptide fragment 2; Thrombin light chain; Thrombin heavy chain ]	F2	+			GOCC	+							15
O95782	AP2A1_HUMAN	AP-2 complex subunit alpha-1 (100 kDa coated vesicle protein A) (Adaptor protein complex AP-2 subunit alpha-1) (Adaptor-related protein complex 2 subunit alpha-1) (Alpha-adaptin A) (Alpha1-adaptin) (Clathrin assembly protein complex 2 alpha-A large chain) (Plasma membrane adaptor HA2/AP2 adaptin alpha A subunit)	AP2A1 ADTAA CLAPA1	+			GOCC	+					+		15
P78347	GTF2I_HUMAN	General transcription factor II-I, GTFII-I, TFII-I (Bruton tyrosine kinase-associated protein 135, BAP-135, BTK-associated protein 135) (SRF-Phox1-interacting protein, SPIN) (Williams-Beuren syndrome chromosomal region 6 protein)	GTF2I BAP135 WBSCR6	+			GOCC							+	15
Q9H4M9	EHD1_HUMAN	EH domain-containing protein 1 (PAST homolog 1, hPAST1) (Testilin)	EHD1 PAST PAST1 CDABP0131	+			GOCC	+					+		15
Q9UGI8	TES_HUMAN	Testin (TESS)	TES	+			GOCC	+							15
Q8TC12	RDH11_HUMAN	Retinol dehydrogenase 11, EC 1.1.1.300 (Androgen-regulated short-chain dehydrogenase/reductase 1) (HCV core-binding protein HCBP12) (Prostate short-chain dehydrogenase/reductase 1) (Retinal reductase 1, RalR1) (Short chain dehydrogenase/reductase family 7C member 1)	RDH11 ARSDR1 PSDR1 SDR7C1 CGI-82	+			GOCC					+			15
P46778	RL21_HUMAN	60S ribosomal protein L21 (Large ribosomal subunit protein eL21)	RPL21	+			GOCC							+	15
P61158	ARP3_HUMAN	Actin-related protein 3 (Actin-like protein 3)	ACTR3 ARP3	+			GOCC							+	15
O00217	NDUS8_HUMAN	NADH dehydrogenase [ubiquinone] iron-sulfur protein 8, mitochondrial, EC 7.1.1.2 (Complex I-23kD, CI-23kD) (NADH-ubiquinone oxidoreductase 23 kDa subunit) (TYKY subunit)	NDUFS8	+			GOCC		+						15
P34897	GLYM_HUMAN	Serine hydroxymethyltransferase, mitochondrial, SHMT, EC 2.1.2.1 (Glycine hydroxymethyltransferase) (Serine methylase)	SHMT2	+			GOCC		+						15
P01024	CO3_HUMAN	Complement C3 (C3 and PZP-like alpha-2-macroglobulin domain-containing protein 1) [Cleaved into: Complement C3 beta chain; C3-beta-c, C3bc; Complement C3 alpha chain; C3a anaphylatoxin; Acylation stimulating protein, ASP (C3adesArg); Complement C3b alpha' chain; Complement C3c alpha' chain fragment 1; Complement C3dg fragment; Complement C3g fragment; Complement C3d fragment; Complement C3f fragm…	C3 CPAMD1	+			GOCC	+							15
P62081	RS7_HUMAN	40S ribosomal protein S7 (Small ribosomal subunit protein eS7)	RPS7	+			GOCC							+	15
Q8IVT2	MISP_HUMAN	Mitotic interactor and substrate of PLK1 (Mitotic spindle positioning protein)	MISP C19orf21	+			GOCC	+							14
P37198	NUP62_HUMAN	Nuclear pore glycoprotein p62 (62 kDa nucleoporin) (Nucleoporin Nup62)	NUP62	+			GOCC			+					14
Q9UMX0	UBQL1_HUMAN	Ubiquilin-1 (Protein linking IAP with cytoskeleton 1, PLIC-1, hPLIC-1)	UBQLN1 DA41 PLIC1	+			GOCC	+							14
P51398	RT29_HUMAN	28S ribosomal protein S29, mitochondrial, MRP-S29, S29mt (Death-associated protein 3, DAP-3) (Ionizing radiation resistance conferring protein) (Mitochondrial small ribosomal subunit protein mS29)	DAP3 MRPS29	+			GOCC		+						14
P35222	CTNB1_HUMAN	Catenin beta-1 (Beta-catenin)	CTNNB1 CTNNB OK/SW-cl.35 PRO2286	+			GOCC	+							14
P35998	PRS7_HUMAN	26S proteasome regulatory subunit 7 (26S proteasome AAA-ATPase subunit RPT1) (Proteasome 26S subunit ATPase 2)	PSMC2 MSS1	+			GOCC							+	14
Q9BS26	ERP44_HUMAN	Endoplasmic reticulum resident protein 44, ER protein 44, ERp44 (Thioredoxin domain-containing protein 4)	ERP44 KIAA0573 TXNDC4 UNQ532/PRO1075	+			GOCC	+			+	+			14
P18669	PGAM1_HUMAN	Phosphoglycerate mutase 1, EC 5.4.2.11, EC 5.4.2.4 (BPG-dependent PGAM 1) (Phosphoglycerate mutase isozyme B, PGAM-B)	PGAM1 PGAMA CDABP0006	+			GOCC							+	14
Q9NUU7	DD19A_HUMAN	ATP-dependent RNA helicase DDX19A, EC 3.6.4.13 (DDX19-like protein) (DEAD box protein 19A)	DDX19A DDX19L	+			GOCC							+	14
P25398	RS12_HUMAN	40S ribosomal protein S12 (Small ribosomal subunit protein eS12)	RPS12	+			GOCC							+	14
Q9BWH2	FUND2_HUMAN	FUN14 domain-containing protein 2 (Cervical cancer proto-oncogene 3 protein, HCC-3) (Hepatitis C virus core-binding protein 6)	FUNDC2 HCBP6 DC44 HCC3 PD03104	+			GOCC		+						14
Q9Y6M9	NDUB9_HUMAN	NADH dehydrogenase [ubiquinone] 1 beta subcomplex subunit 9 (Complex I-B22, CI-B22) (LYR motif-containing protein 3) (NADH-ubiquinone oxidoreductase B22 subunit)	NDUFB9 LYRM3 UQOR22	+			GOCC		+						14
O14579	COPE_HUMAN	Coatomer subunit epsilon (Epsilon-coat protein, Epsilon-COP)	COPE	+			GOCC				+	+			13
O76021	RL1D1_HUMAN	Ribosomal L1 domain-containing protein 1 (CATX-11) (Cellular senescence-inhibited gene protein) (Protein PBK1)	RSL1D1 CATX11 CSIG PBK1 L12	+			GOCC							+	13
P00338	LDHA_HUMAN	L-lactate dehydrogenase A chain, LDH-A, EC 1.1.1.27 (Cell proliferation-inducing gene 19 protein) (LDH muscle subunit, LDH-M) (Renal carcinoma antigen NY-REN-59)	LDHA PIG19	+			GOCC							+	13
Q9BUP3	HTAI2_HUMAN	Oxidoreductase HTATIP2, EC 1.1.1.- (30 kDa HIV-1 TAT-interacting protein) (HIV-1 TAT-interactive protein 2)	HTATIP2 CC3 TIP30	+			GOCC			+					13
P15311	EZRI_HUMAN	Ezrin (Cytovillin) (Villin-2) (p81)	EZR VIL2	+			GOCC	+							13
Q5JWF2	GNAS1_HUMAN	Guanine nucleotide-binding protein G(s) subunit alpha isoforms XLas (Adenylate cyclase-stimulating G alpha protein) (Extra large alphas protein, XLalphas)	GNAS GNAS1	+			GOCC	+							13
P05198	IF2A_HUMAN	Eukaryotic translation initiation factor 2 subunit 1 (Eukaryotic translation initiation factor 2 subunit alpha, eIF-2-alpha, eIF-2A, eIF-2alpha)	EIF2S1 EIF2A	+			GOCC							+	13
Q15056	IF4H_HUMAN	Eukaryotic translation initiation factor 4H, eIF-4H (Williams-Beuren syndrome chromosomal region 1 protein)	EIF4H KIAA0038 WBSCR1 WSCR1	+			GOCC							+	13
Q9NVJ2	ARL8B_HUMAN	ADP-ribosylation factor-like protein 8B, EC 3.6.5.2 (ADP-ribosylation factor-like protein 10C) (Novel small G protein indispensable for equal chromosome segregation 1)	ARL8B ARL10C GIE1	+			GOCC						+		13
P62244	RS15A_HUMAN	40S ribosomal protein S15a (Small ribosomal subunit protein uS8)	RPS15A OK/SW-cl.82	+			GOCC							+	13
O75964	ATP5L_HUMAN	ATP synthase subunit g, mitochondrial, ATPase subunit g (ATP synthase membrane subunit g)	ATP5MG ATP5L	+			GOCC		+						13
Q8N4H5	TOM5_HUMAN	Mitochondrial import receptor subunit TOM5 homolog	TOMM5 C9orf105 TOM5	+			GOCC		+						13
Q15154	PCM1_HUMAN	Pericentriolar material 1 protein, PCM-1, hPCM-1	PCM1	+			GOCC			+					12
Q9UHD9	UBQL2_HUMAN	Ubiquilin-2 (Chap1) (DSK2 homolog) (Protein linking IAP with cytoskeleton 2, PLIC-2, hPLIC-2) (Ubiquitin-like product Chap1/Dsk2)	UBQLN2 N4BP4 PLIC2 HRIHFB2157	+			GOCC	+							12
O15027	SC16A_HUMAN	Protein transport protein Sec16A (SEC16 homolog A, p250)	SEC16A KIAA0310 SEC16 SEC16L	+			GOCC				+	+	+		12
Q16643	DREB_HUMAN	Drebrin (Developmentally-regulated brain protein)	DBN1 D0S117E	+			GOCC	+							12
Q9BZG1	RAB34_HUMAN	Ras-related protein Rab-34 (Ras-related protein Rab-39) (Ras-related protein Rah)	RAB34 RAB39 RAH	+			GOCC						+		12
Q02818	NUCB1_HUMAN	Nucleobindin-1 (CALNUC)	NUCB1 NUC	+			GOCC				+	+			12
Q96AQ6	PBIP1_HUMAN	Pre-B-cell leukemia transcription factor-interacting protein 1 (Hematopoietic PBX-interacting protein)	PBXIP1 HPIP	+			GOCC							+	12
P62280	RS11_HUMAN	40S ribosomal protein S11 (Small ribosomal subunit protein uS17)	RPS11	+			GOCC							+	12
O60506	HNRPQ_HUMAN	Heterogeneous nuclear ribonucleoprotein Q, hnRNP Q (Glycine- and tyrosine-rich RNA-binding protein, GRY-RBP) (NS1-associated protein 1) (Synaptotagmin-binding, cytoplasmic RNA-interacting protein)	SYNCRIP HNRPQ NSAP1	+			GOCC							+	12
Q92575	UBXN4_HUMAN	UBX domain-containing protein 4 (Erasin) (UBX domain-containing protein 2)	UBXN4 KIAA0242 UBXD2 UBXDC1	+			GOCC			+		+			12
P83731	RL24_HUMAN	60S ribosomal protein L24 (60S ribosomal protein L30) (Large ribosomal subunit protein eL24)	RPL24	+			GOCC							+	12
P61769	B2MG_HUMAN	Beta-2-microglobulin [Cleaved into: Beta-2-microglobulin form pI 5.3 ]	B2M CDABP0092 HDCMA22P	+			GOCC	+			+		+		12
Q9Y3U8	RL36_HUMAN	60S ribosomal protein L36 (Large ribosomal subunit protein eL36)	RPL36	+			GOCC							+	12
P20338	RAB4A_HUMAN	Ras-related protein Rab-4A, EC 3.6.5.2	RAB4A RAB4	+			GOCC	+					+		12
Q9H082	RB33B_HUMAN	Ras-related protein Rab-33B	RAB33B	+			GOCC				+				12
Q53H12	AGK_HUMAN	Acylglycerol kinase, mitochondrial, hAGK, EC 2.7.1.107, EC 2.7.1.138, EC 2.7.1.94 (Multiple substrate lipid kinase, HsMuLK, MuLK, Multi-substrate lipid kinase)	AGK MULK	+			GOCC		+						11
Q9NVD7	PARVA_HUMAN	Alpha-parvin (Actopaxin) (CH-ILKBP) (Calponin-like integrin-linked kinase-binding protein) (Matrix-remodeling-associated protein 2)	PARVA MXRA2	+			GOCC	+							11
P28331	NDUS1_HUMAN	NADH-ubiquinone oxidoreductase 75 kDa subunit, mitochondrial, EC 7.1.1.2 (Complex I-75kD, CI-75kD)	NDUFS1	+			GOCC		+						11
P37235	HPCL1_HUMAN	Hippocalcin-like protein 1 (Calcium-binding protein BDR-1) (HLP2) (Visinin-like protein 3, VILIP-3)	HPCAL1 BDR1	+			GOCC							+	11
Q6YN16	HSDL2_HUMAN	Hydroxysteroid dehydrogenase-like protein 2, EC 1.-.-.- (Short chain dehydrogenase/reductase family 13C member 1)	HSDL2 C9orf99 SDR13C1	+			GOCC							+	11
O95470	SGPL1_HUMAN	Sphingosine-1-phosphate lyase 1, S1PL, SP-lyase 1, SPL 1, hSPL, EC 4.1.2.27 (Sphingosine-1-phosphate aldolase)	SGPL1 KIAA1252	+			GOCC					+			11
P62829	RL23_HUMAN	60S ribosomal protein L23 (60S ribosomal protein L17) (Large ribosomal subunit protein uL14)	RPL23	+			GOCC							+	11
P09543	CN37_HUMAN	2',3'-cyclic-nucleotide 3'-phosphodiesterase, CNP, CNPase, EC 3.1.4.37	CNP	+			GOCC	+	+						11
P08758	ANXA5_HUMAN	Annexin A5 (Anchorin CII) (Annexin V) (Annexin-5) (Calphobindin I, CPB-I) (Endonexin II) (Lipocortin V) (Placental anticoagulant protein 4, PP4) (Placental anticoagulant protein I, PAP-I) (Thromboplastin inhibitor) (Vascular anticoagulant-alpha, VAC-alpha)	ANXA5 ANX5 ENX2 PP4	+			GOCC	+							11
O00161	SNP23_HUMAN	Synaptosomal-associated protein 23, SNAP-23 (Vesicle-membrane fusion protein SNAP-23)	SNAP23	+			GOCC	+					+		11
Q07021	C1QBP_HUMAN	Complement component 1 Q subcomponent-binding protein, mitochondrial (ASF/SF2-associated protein p32) (Glycoprotein gC1qBP, C1qBP) (Hyaluronan-binding protein 1) (Mitochondrial matrix protein p32) (gC1q-R protein) (p33, SF2AP32)	C1QBP GC1QBP HABP1 SF2P32	+			GOCC	+							11
Q15029	U5S1_HUMAN	116 kDa U5 small nuclear ribonucleoprotein component (Elongation factor Tu GTP-binding domain-containing protein 2) (SNU114 homolog, hSNU114) (U5 snRNP-specific protein, 116 kDa, U5-116 kDa)	EFTUD2 KIAA0031 SNRP116	+			GOCC							+	11
P11233	RALA_HUMAN	Ras-related protein Ral-A, EC 3.6.5.2	RALA RAL	+			GOCC	+					+		11
Q8WWC4	MAIP1_HUMAN	m-AAA protease-interacting protein 1, mitochondrial (Matrix AAA peptidase-interacting protein 1)	MAIP1 C2orf47	+			GOCC		+						11
P41252	SYIC_HUMAN	Isoleucine--tRNA ligase, cytoplasmic, EC 6.1.1.5 (Isoleucyl-tRNA synthetase, IRS, IleRS)	IARS1 IARS	+			GOCC							+	11
Q15942	ZYX_HUMAN	Zyxin (Zyxin-2)	ZYX	+			GOCC	+							11
Q13418	ILK_HUMAN	Integrin-linked protein kinase, EC 2.7.11.1 (59 kDa serine/threonine-protein kinase) (Beta-integrin-linked kinase) (ILK-1) (ILK-2) (p59ILK)	ILK ILK1 ILK2	+			GOCC	+							11
Q32P28	P3H1_HUMAN	Prolyl 3-hydroxylase 1, EC 1.14.11.7 (Growth suppressor 1) (Leucine- and proline-enriched proteoglycan 1, Leprecan-1)	P3H1 GROS1 LEPRE1 PSEC0109	+			GOCC							+	11
O14561	ACPM_HUMAN	Acyl carrier protein, mitochondrial, ACP (CI-SDAP) (NADH-ubiquinone oxidoreductase 9.6 kDa subunit)	NDUFAB1	+			GOCC		+						11
Q9Y6B6	SAR1B_HUMAN	GTP-binding protein SAR1b (GTP-binding protein B, GTBPB)	SAR1B SARA2 SARB	+			GOCC					+	+		11
Q15771	RAB30_HUMAN	Ras-related protein Rab-30	RAB30	+			GOCC				+				11
P62277	RS13_HUMAN	40S ribosomal protein S13 (Small ribosomal subunit protein uS15)	RPS13	+			GOCC							+	11
P18077	RL35A_HUMAN	60S ribosomal protein L35a (Cell growth-inhibiting gene 33 protein) (Large ribosomal subunit protein eL33)	RPL35A GIG33	+			GOCC							+	11
P62140	PP1B_HUMAN	Serine/threonine-protein phosphatase PP1-beta catalytic subunit, PP-1B, PPP1CD, EC 3.1.3.16, EC 3.1.3.53	PPP1CB	+			GOCC	+							10
P40763	STAT3_HUMAN	Signal transducer and activator of transcription 3 (Acute-phase response factor)	STAT3 APRF	+			GOCC	+							10
P11047	LAMC1_HUMAN	Laminin subunit gamma-1 (Laminin B2 chain) (Laminin-1 subunit gamma) (Laminin-10 subunit gamma) (Laminin-11 subunit gamma) (Laminin-2 subunit gamma) (Laminin-3 subunit gamma) (Laminin-4 subunit gamma) (Laminin-6 subunit gamma) (Laminin-7 subunit gamma) (Laminin-8 subunit gamma) (Laminin-9 subunit gamma) (S-laminin subunit gamma, S-LAM gamma)	LAMC1 LAMB2	+			GOCC							+	10
P62745	RHOB_HUMAN	Rho-related GTP-binding protein RhoB (Rho cDNA clone 6, h6)	RHOB ARH6 ARHB	+			GOCC	+					+		10
Q9H0H5	RGAP1_HUMAN	Rac GTPase-activating protein 1 (Male germ cell RacGap, MgcRacGAP) (Protein CYK4 homolog, CYK4, HsCYK-4)	RACGAP1 KIAA1478 MGCRACGAP	+			GOCC	+							10
P05387	RLA2_HUMAN	60S acidic ribosomal protein P2 (Large ribosomal subunit protein P2) (Renal carcinoma antigen NY-REN-44)	RPLP2 D11S2243E RPP2	+			GOCC							+	10
Q86VP6	CAND1_HUMAN	Cullin-associated NEDD8-dissociated protein 1 (Cullin-associated and neddylation-dissociated protein 1) (TBP-interacting protein of 120 kDa A, TBP-interacting protein 120A) (p120 CAND1)	CAND1 KIAA0829 TIP120 TIP120A	+			GOCC							+	10
P40616	ARL1_HUMAN	ADP-ribosylation factor-like protein 1	ARL1	+			GOCC				+				10
O75251	NDUS7_HUMAN	NADH dehydrogenase [ubiquinone] iron-sulfur protein 7, mitochondrial, EC 7.1.1.2 (Complex I-20kD, CI-20kD) (NADH-ubiquinone oxidoreductase 20 kDa subunit) (PSST subunit)	NDUFS7	+			GOCC		+						10
Q9Y2Q3	GSTK1_HUMAN	Glutathione S-transferase kappa 1, EC 2.5.1.18 (GST 13-13) (GST class-kappa) (GSTK1-1, hGSTK1) (Glutathione S-transferase subunit 13)	GSTK1 HDCMD47P	+			GOCC							+	10
P56192	SYMC_HUMAN	Methionine--tRNA ligase, cytoplasmic, EC 6.1.1.10 (Methionyl-tRNA synthetase, MetRS)	MARS1 MARS	+			GOCC							+	10
P54819	KAD2_HUMAN	Adenylate kinase 2, mitochondrial, AK 2, EC 2.7.4.3 (ATP-AMP transphosphorylase 2) (ATP:AMP phosphotransferase) (Adenylate monophosphate kinase) [Cleaved into: Adenylate kinase 2, mitochondrial, N-terminally processed ]	AK2 ADK2	+			GOCC							+	10
Q14444	CAPR1_HUMAN	Caprin-1 (Cell cycle-associated protein 1) (Cytoplasmic activation- and proliferation-associated protein 1) (GPI-anchored membrane protein 1) (GPI-anchored protein p137, GPI-p137, p137GPI) (Membrane component chromosome 11 surface marker 1) (RNA granule protein 105)	CAPRIN1 GPIAP1 GPIP137 M11S1 RNG105	+			GOCC							+	10
Q9NP72	RAB18_HUMAN	Ras-related protein Rab-18	RAB18	+			GOCC	+				+			10
O75306	NDUS2_HUMAN	NADH dehydrogenase [ubiquinone] iron-sulfur protein 2, mitochondrial, EC 7.1.1.2 (Complex I-49kD, CI-49kD) (NADH-ubiquinone oxidoreductase 49 kDa subunit)	NDUFS2	+			GOCC		+						10
Q96B49	TOM6_HUMAN	Mitochondrial import receptor subunit TOM6 homolog (Overexpressed breast tumor protein) (Translocase of outer membrane 6 kDa subunit homolog)	TOMM6 OBTP TOM6	+			GOCC		+						10
Q9Y3I0	RTCB_HUMAN	RNA-splicing ligase RtcB homolog, EC 6.5.1.8 (3'-phosphate/5'-hydroxy nucleic acid ligase)	RTCB C22orf28 HSPC117	+			GOCC			+		+			10
Q96P70	IPO9_HUMAN	Importin-9, Imp9 (Ran-binding protein 9, RanBP9)	IPO9 IMP9 KIAA1192 RANBP9 HSPC273	+			GOCC			+					9
P61421	VA0D1_HUMAN	V-type proton ATPase subunit d 1, V-ATPase subunit d 1 (32 kDa accessory protein) (V-ATPase 40 kDa accessory protein) (V-ATPase AC39 subunit, p39) (Vacuolar proton pump subunit d 1)	ATP6V0D1 ATP6D VPATPD	+			GOCC	+					+		9
P07942	LAMB1_HUMAN	Laminin subunit beta-1 (Laminin B1 chain) (Laminin-1 subunit beta) (Laminin-10 subunit beta) (Laminin-12 subunit beta) (Laminin-2 subunit beta) (Laminin-6 subunit beta) (Laminin-8 subunit beta)	LAMB1	+			GOCC							+	9
Q9BU61	NDUF3_HUMAN	NADH dehydrogenase [ubiquinone] 1 alpha subcomplex assembly factor 3	NDUFAF3 C3orf60	+			GOCC		+						9
P17568	NDUB7_HUMAN	NADH dehydrogenase [ubiquinone] 1 beta subcomplex subunit 7 (Cell adhesion protein SQM1) (Complex I-B18, CI-B18) (NADH-ubiquinone oxidoreductase B18 subunit)	NDUFB7	+			GOCC		+						9
Q6IAA8	LTOR1_HUMAN	Ragulator complex protein LAMTOR1 (Late endosomal/lysosomal adaptor and MAPK and MTOR activator 1) (Lipid raft adaptor protein p18) (Protein associated with DRMs and endosomes) (p27Kip1-releasing factor from RhoA, p27RF-Rho)	LAMTOR1 C11orf59 PDRO PP7157	+			GOCC	+					+		9
Q9Y6N5	SQOR_HUMAN	Sulfide:quinone oxidoreductase, mitochondrial, SQOR, EC 1.8.5.8 (Sulfide dehydrogenase-like) (Sulfide quinone oxidoreductase)	SQOR SQRDL CGI-44	+			GOCC		+						9
Q14839	CHD4_HUMAN	Chromodomain-helicase-DNA-binding protein 4, CHD-4, EC 3.6.4.12 (ATP-dependent helicase CHD4) (Mi-2 autoantigen 218 kDa protein) (Mi2-beta)	CHD4	+			GOCC							+	9
Q8IWB1	IPRI_HUMAN	Inositol 1,4,5-trisphosphate receptor-interacting protein (Protein DANGER)	ITPRIP DANGER KIAA1754	+			GOCC	+		+					9
P08708	RS17_HUMAN	40S ribosomal protein S17 (Small ribosomal subunit protein eS17)	RPS17 RPS17L	+			GOCC							+	9
Q07666	KHDR1_HUMAN	KH domain-containing, RNA-binding, signal transduction-associated protein 1 (GAP-associated tyrosine phosphoprotein p62) (Src-associated in mitosis 68 kDa protein, Sam68) (p21 Ras GTPase-activating protein-associated p62) (p68)	KHDRBS1 SAM68	+			GOCC							+	9
P48047	ATPO_HUMAN	ATP synthase subunit O, mitochondrial (ATP synthase peripheral stalk subunit OSCP) (Oligomycin sensitivity conferral protein, OSCP)	ATP5PO ATP5O ATPO	+			GOCC	+	+						9
P26038	MOES_HUMAN	Moesin (Membrane-organizing extension spike protein)	MSN	+			GOCC	+							9
P22087	FBRL_HUMAN	rRNA 2'-O-methyltransferase fibrillarin, EC 2.1.1.- (34 kDa nucleolar scleroderma antigen) (Histone-glutamine methyltransferase) (U6 snRNA 2'-O-methyltransferase fibrillarin)	FBL FIB1 FLRN	+			GOCC							+	9
Q9BRR6	ADPGK_HUMAN	ADP-dependent glucokinase, ADP-GK, ADPGK, EC 2.7.1.147 (RbBP-35)	ADPGK PSEC0260	+			GOCC					+			9
P62263	RS14_HUMAN	40S ribosomal protein S14 (Small ribosomal subunit protein uS11)	RPS14 PRO2640	+			GOCC							+	9
Q9Y6E2	5MP1_HUMAN	eIF5-mimic protein 1 (Basic leucine zipper and W2 domain-containing protein 2)	BZW2 5MP1 HSPC028 MSTP017	+			GOCC							+	9
P02649	APOE_HUMAN	Apolipoprotein E, Apo-E	APOE	+			GOCC	+					+		9
Q9UI09	NDUAC_HUMAN	NADH dehydrogenase [ubiquinone] 1 alpha subcomplex subunit 12 (13 kDa differentiation-associated protein) (Complex I-B17.2, CI-B17.2, CIB17.2) (NADH-ubiquinone oxidoreductase subunit B17.2)	NDUFA12 DAP13	+			GOCC		+						9
Q9UNH7	SNX6_HUMAN	Sorting nexin-6 (TRAF4-associated factor 2) [Cleaved into: Sorting nexin-6, N-terminally processed ]	SNX6	+			GOCC						+		9
O94874	UFL1_HUMAN	E3 UFM1-protein ligase 1, EC 2.3.2.- (E3 UFM1-protein transferase 1) (Multiple alpha-helix protein located at ER) (Novel LZAP-binding protein) (Regulator of C53/LZAP and DDRGK1)	UFL1 KIAA0776 MAXER NLBP RCAD	+			GOCC					+			9
Q6FI81	CPIN1_HUMAN	Anamorsin (Cytokine-induced apoptosis inhibitor 1) (Fe-S cluster assembly protein DRE2 homolog)	CIAPIN1 CUA001 PRO0915	+			GOCC							+	9
P35052	GPC1_HUMAN	Glypican-1 [Cleaved into: Secreted glypican-1 ]	GPC1	+			GOCC	+							9
O15230	LAMA5_HUMAN	Laminin subunit alpha-5 (Laminin-10 subunit alpha) (Laminin-11 subunit alpha) (Laminin-15 subunit alpha)	LAMA5 KIAA0533 KIAA1907	+			GOCC							+	8
P20073	ANXA7_HUMAN	Annexin A7 (Annexin VII) (Annexin-7) (Synexin)	ANXA7 ANX7 SNX OK/SW-cl.95	+			GOCC					+			8
P29966	MARCS_HUMAN	Myristoylated alanine-rich C-kinase substrate, MARCKS (Protein kinase C substrate, 80 kDa protein, light chain, 80K-L protein, PKCSL)	MARCKS MACS PRKCSL	+			GOCC	+							8
Q9NZN4	EHD2_HUMAN	EH domain-containing protein 2 (PAST homolog 2)	EHD2 PAST2	+			GOCC	+					+		8
P62888	RL30_HUMAN	60S ribosomal protein L30 (Large ribosomal subunit protein eL30)	RPL30	+			GOCC							+	8
P25205	MCM3_HUMAN	DNA replication licensing factor MCM3, EC 3.6.4.12 (DNA polymerase alpha holoenzyme-associated protein P1) (P1-MCM3) (RLF subunit beta) (p102)	MCM3	+			GOCC							+	8
Q1KMD3	HNRL2_HUMAN	Heterogeneous nuclear ribonucleoprotein U-like protein 2 (Scaffold-attachment factor A2, SAF-A2)	HNRNPUL2 HNRPUL2	+			GOCC							+	8
O00629	IMA3_HUMAN	Importin subunit alpha-3 (Importin alpha Q1, Qip1) (Karyopherin subunit alpha-4)	KPNA4 QIP1	+			GOCC			+					8
Q96EY1	DNJA3_HUMAN	DnaJ homolog subfamily A member 3, mitochondrial (DnaJ protein Tid-1, hTid-1) (Hepatocellular carcinoma-associated antigen 57) (Tumorous imaginal discs protein Tid56 homolog)	DNAJA3 HCA57 TID1	+			GOCC	+							8
P49773	HINT1_HUMAN	Adenosine 5'-monophosphoramidase HINT1, EC 3.9.1.- (Desumoylating isopeptidase HINT1, EC 3.4.22.-) (Histidine triad nucleotide-binding protein 1) (Protein kinase C inhibitor 1) (Protein kinase C-interacting protein 1, PKCI-1)	HINT1 HINT PKCI1 PRKCNH1	+			GOCC	+							8
P50570	DYN2_HUMAN	Dynamin-2, EC 3.6.5.5	DNM2 DYN2	+			GOCC	+			+		+		8
O75439	MPPB_HUMAN	Mitochondrial-processing peptidase subunit beta, EC 3.4.24.64 (Beta-MPP) (P-52)	PMPCB MPPB	+			GOCC		+						8
P33176	KINH_HUMAN	Kinesin-1 heavy chain (Conventional kinesin heavy chain) (Ubiquitous kinesin heavy chain, UKHC)	KIF5B KNS KNS1	+			GOCC						+		8
P00558	PGK1_HUMAN	Phosphoglycerate kinase 1, EC 2.7.2.3 (Cell migration-inducing gene 10 protein) (Primer recognition protein 2, PRP 2)	PGK1 PGKA MIG10 OK/SW-cl.110	+			GOCC							+	8
O94906	PRP6_HUMAN	Pre-mRNA-processing factor 6 (Androgen receptor N-terminal domain-transactivating protein 1, ANT-1) (PRP6 homolog) (U5 snRNP-associated 102 kDa protein, U5-102 kDa protein)	PRPF6 C20orf14	+			GOCC							+	8
P61221	ABCE1_HUMAN	ATP-binding cassette sub-family E member 1 (2'-5'-oligoadenylate-binding protein) (HuHP68) (RNase L inhibitor) (Ribonuclease 4 inhibitor, RNS4I)	ABCE1 RLI RNASEL1 RNASELI RNS4I OK/SW-cl.40	+			GOCC							+	8
P26196	DDX6_HUMAN	Probable ATP-dependent RNA helicase DDX6, EC 3.6.4.13 (ATP-dependent RNA helicase p54) (DEAD box protein 6) (Oncogene RCK)	DDX6 HLR2 RCK	+			GOCC							+	8
Q13177	PAK2_HUMAN	Serine/threonine-protein kinase PAK 2, EC 2.7.11.1 (Gamma-PAK) (PAK65) (S6/H4 kinase) (p21-activated kinase 2, PAK-2) (p58) [Cleaved into: PAK-2p27, p27; PAK-2p34, p34 (C-t-PAK2) ]	PAK2	+			GOCC	+							8
P29590	PML_HUMAN	Protein PML (E3 SUMO-protein ligase PML, EC 2.3.2.-) (Promyelocytic leukemia protein) (RING finger protein 71) (RING-type E3 SUMO transferase PML) (Tripartite motif-containing protein 19, TRIM19)	PML MYL PP8675 RNF71 TRIM19	+			GOCC			+		+	+		8
P46776	RL27A_HUMAN	60S ribosomal protein L27a (Large ribosomal subunit protein uL15)	RPL27A	+			GOCC							+	8
P54136	SYRC_HUMAN	Arginine--tRNA ligase, cytoplasmic, EC 6.1.1.19 (Arginyl-tRNA synthetase, ArgRS)	RARS1 RARS	+			GOCC							+	8
P04075	ALDOA_HUMAN	Fructose-bisphosphate aldolase A, EC 4.1.2.13 (Lung cancer antigen NY-LU-1) (Muscle-type aldolase)	ALDOA ALDA	+			GOCC							+	8
Q96EY7	PTCD3_HUMAN	Pentatricopeptide repeat domain-containing protein 3, mitochondrial (28S ribosomal protein S39, mitochondrial, MRP-S39) (Mitochondrial small ribosomal subunit protein mS39) (Transformation-related gene 15 protein, TRG-15)	PTCD3 MRPS39 TRG15	+			GOCC	+	+						8
O43819	SCO2_HUMAN	Protein SCO2 homolog, mitochondrial	SCO2	+			GOCC		+						8
Q14344	GNA13_HUMAN	Guanine nucleotide-binding protein subunit alpha-13, G alpha-13, G-protein subunit alpha-13	GNA13	+			GOCC	+							8
Q15717	ELAV1_HUMAN	ELAV-like protein 1 (Hu-antigen R, HuR)	ELAVL1 HUR	+			GOCC							+	8
O75616	ERAL1_HUMAN	GTPase Era, mitochondrial, H-ERA, hERA (Conserved ERA-like GTPase, CEGA) (ERA-W) (ERA-like protein 1)	ERAL1 HERA	+			GOCC		+						8
P07195	LDHB_HUMAN	L-lactate dehydrogenase B chain, LDH-B, EC 1.1.1.27 (LDH heart subunit, LDH-H) (Renal carcinoma antigen NY-REN-46)	LDHB	+			GOCC		+						8
P37268	FDFT_HUMAN	Squalene synthase, SQS, SS, EC 2.5.1.21 (FPP:FPP farnesyltransferase) (Farnesyl-diphosphate farnesyltransferase) (Farnesyl-diphosphate farnesyltransferase 1)	FDFT1	+			GOCC					+			8
O43402	EMC8_HUMAN	ER membrane protein complex subunit 8 (Neighbor of COX4) (Protein FAM158B)	EMC8 C16orf2 C16orf4 COX4AL COX4NB FAM158B NOC4	+			GOCC					+			8
P0DP25	CALM3_HUMAN	Calmodulin-3	CALM3 CALML2 CAM3 CAMC CAMIII	+			GOCC	+	+				+		8
P43686	PRS6B_HUMAN	26S proteasome regulatory subunit 6B (26S proteasome AAA-ATPase subunit RPT3) (MB67-interacting protein) (MIP224) (Proteasome 26S subunit ATPase 4) (Tat-binding protein 7, TBP-7)	PSMC4 MIP224 TBP7	+			GOCC							+	7
O00468	AGRIN_HUMAN	Agrin [Cleaved into: Agrin N-terminal 110 kDa subunit; Agrin C-terminal 110 kDa subunit; Agrin C-terminal 90 kDa fragment, C90; Agrin C-terminal 22 kDa fragment, C22 ]	AGRN AGRIN	+			GOCC	+							7
P40926	MDHM_HUMAN	Malate dehydrogenase, mitochondrial, EC 1.1.1.37	MDH2	+			GOCC							+	7
Q9H3P7	GCP60_HUMAN	Golgi resident protein GCP60 (Acyl-CoA-binding domain-containing protein 3) (Golgi complex-associated protein 1, GOCAP1) (Golgi phosphoprotein 1, GOLPH1) (PBR- and PKA-associated protein 7) (Peripheral benzodiazepine receptor-associated protein PAP7) [Cleaved into: Golgi resident protein GCP60, N-terminally processed ]	ACBD3 GCP60 GOCAP1 GOLPH1	+			GOCC				+				7
Q8N6T3	ARFG1_HUMAN	ADP-ribosylation factor GTPase-activating protein 1, ARF GAP 1 (ADP-ribosylation factor 1 GTPase-activating protein, ARF1 GAP) (ARF1-directed GTPase-activating protein)	ARFGAP1 ARF1GAP	+			GOCC				+				7
P07384	CAN1_HUMAN	Calpain-1 catalytic subunit, EC 3.4.22.52 (Calcium-activated neutral proteinase 1, CANP 1) (Calpain mu-type) (Calpain-1 large subunit) (Cell proliferation-inducing gene 30 protein) (Micromolar-calpain, muCANP)	CAPN1 CANPL1 PIG30	+			GOCC	+							7
O00232	PSD12_HUMAN	26S proteasome non-ATPase regulatory subunit 12 (26S proteasome regulatory subunit RPN5) (26S proteasome regulatory subunit p55)	PSMD12	+			GOCC							+	7
P04004	VTNC_HUMAN	Vitronectin, VN (S-protein) (Serum-spreading factor) (V75) [Cleaved into: Vitronectin V65 subunit; Vitronectin V10 subunit; Somatomedin-B ]	VTN	+			GOCC							+	7
Q14C86	GAPD1_HUMAN	GTPase-activating protein and VPS9 domain-containing protein 1 (GAPex-5) (Rab5-activating protein 6)	GAPVD1 GAPEX5 KIAA1521 RAP6	+			GOCC	+							7
Q9H223	EHD4_HUMAN	EH domain-containing protein 4 (Hepatocellular carcinoma-associated protein 10/11) (PAST homolog 4)	EHD4 HCA10 HCA11 PAST4 FKSG7	+			GOCC	+					+		7
P46777	RL5_HUMAN	60S ribosomal protein L5 (Large ribosomal subunit protein uL18)	RPL5 MSTP030	+			GOCC							+	7
P06703	S10A6_HUMAN	Protein S100-A6 (Calcyclin) (Growth factor-inducible protein 2A9) (MLN 4) (Prolactin receptor-associated protein, PRA) (S100 calcium-binding protein A6)	S100A6 CACY	+			GOCC	+		+					7
Q8NBJ5	GT251_HUMAN	Procollagen galactosyltransferase 1, EC 2.4.1.50 (Collagen beta(1-O)galactosyltransferase 1, ColGalT 1) (Glycosyltransferase 25 family member 1) (Hydroxylysine galactosyltransferase 1)	COLGALT1 GLT25D1 PSEC0241	+			GOCC							+	7
O60610	DIAP1_HUMAN	Protein diaphanous homolog 1 (Diaphanous-related formin-1, DRF1)	DIAPH1 DIAP1	+			GOCC	+							7
Q6NZI2	CAVN1_HUMAN	Caveolae-associated protein 1 (Cavin-1) (Polymerase I and transcript release factor)	CAVIN1 PTRF FKSG13	+			GOCC	+							6
P18859	ATP5J_HUMAN	ATP synthase-coupling factor 6, mitochondrial, ATPase subunit F6 (ATP synthase peripheral stalk subunit F6)	ATP5PF ATP5A ATP5J ATPM	+			GOCC		+						6
P61160	ARP2_HUMAN	Actin-related protein 2 (Actin-like protein 2)	ACTR2 ARP2	+			GOCC							+	6
Q96RQ1	ERGI2_HUMAN	Endoplasmic reticulum-Golgi intermediate compartment protein 2	ERGIC2 ERV41 PTX1 CDA14	+			GOCC				+	+			6
P60228	EIF3E_HUMAN	Eukaryotic translation initiation factor 3 subunit E, eIF3e (Eukaryotic translation initiation factor 3 subunit 6) (Viral integration site protein INT-6 homolog) (eIF-3 p48)	EIF3E EIF3S6 INT6	+			GOCC							+	6
O00469	PLOD2_HUMAN	Procollagen-lysine,2-oxoglutarate 5-dioxygenase 2, EC 1.14.11.4 (Lysyl hydroxylase 2, LH2)	PLOD2	+			GOCC					+			6
P08237	PFKAM_HUMAN	ATP-dependent 6-phosphofructokinase, muscle type, ATP-PFK, PFK-M, EC 2.7.1.11 (6-phosphofructokinase type A) (Phosphofructo-1-kinase isozyme A, PFK-A) (Phosphohexokinase)	PFKM PFKX	+			GOCC	+							6
P39748	FEN1_HUMAN	Flap endonuclease 1, FEN-1, EC 3.1.-.- (DNase IV) (Flap structure-specific endonuclease 1) (Maturation factor 1, MF1, hFEN-1)	FEN1 RAD2	+			GOCC							+	6
P17252	KPCA_HUMAN	Protein kinase C alpha type, PKC-A, PKC-alpha, EC 2.7.11.13	PRKCA PKCA PRKACA	+			GOCC	+	+						6
P04150	GCR_HUMAN	Glucocorticoid receptor, GR (Nuclear receptor subfamily 3 group C member 1)	NR3C1 GRL	+			GOCC							+	6
Q9BQ95	ECSIT_HUMAN	Evolutionarily conserved signaling intermediate in Toll pathway, mitochondrial (Protein SITPEC)	ECSIT	+			GOCC		+						6
Q13155	AIMP2_HUMAN	Aminoacyl tRNA synthase complex-interacting multifunctional protein 2 (Multisynthase complex auxiliary component p38) (Protein JTV-1)	AIMP2 JTV1 PRO0992	+			GOCC							+	6
O60437	PEPL_HUMAN	Periplakin (190 kDa paraneoplastic pemphigus antigen) (195 kDa cornified envelope precursor protein)	PPL KIAA0568	+			GOCC	+							6
P33991	MCM4_HUMAN	DNA replication licensing factor MCM4, EC 3.6.4.12 (CDC21 homolog) (P1-CDC21)	MCM4 CDC21	+			GOCC							+	6
Q9BVP2	GNL3_HUMAN	Guanine nucleotide-binding protein-like 3 (E2-induced gene 3 protein) (Novel nucleolar protein 47, NNP47) (Nucleolar GTP-binding protein 3) (Nucleostemin)	GNL3 E2IG3 NS	+			GOCC							+	6
Q9H8Y8	GORS2_HUMAN	Golgi reassembly-stacking protein 2, GRS2 (Golgi phosphoprotein 6, GOLPH6) (Golgi reassembly-stacking protein of 55 kDa, GRASP55) (p59)	GORASP2 GOLPH6	+			GOCC				+	+			6
Q15691	MARE1_HUMAN	Microtubule-associated protein RP/EB family member 1 (APC-binding protein EB1) (End-binding protein 1, EB1)	MAPRE1	+			GOCC							+	6
Q00341	VIGLN_HUMAN	Vigilin (High density lipoprotein-binding protein, HDL-binding protein)	HDLBP HBP VGL	+			GOCC	+							6
P33993	MCM7_HUMAN	DNA replication licensing factor MCM7, EC 3.6.4.12 (CDC47 homolog) (P1.1-MCM3)	MCM7 CDC47 MCM2	+			GOCC							+	6
Q9H0U6	RM18_HUMAN	39S ribosomal protein L18, mitochondrial, L18mt, MRP-L18 (Mitochondrial large ribosomal subunit protein uL18m)	MRPL18 HSPC071	+			GOCC		+						6
O43852	CALU_HUMAN	Calumenin (Crocalbin) (IEF SSP 9302)	CALU	+			GOCC					+			6
P62330	ARF6_HUMAN	ADP-ribosylation factor 6, EC 3.6.5.2	ARF6	+			GOCC	+					+		6
P17152	TMM11_HUMAN	Transmembrane protein 11, mitochondrial (Protein PM1) (Protein PMI)	TMEM11 C17orf35 PM1	+			GOCC	+	+						6
O00541	PESC_HUMAN	Pescadillo homolog	PES1	+			GOCC							+	6
Q9Y6H1	CHCH2_HUMAN	Coiled-coil-helix-coiled-coil-helix domain-containing protein 2 (Aging-associated gene 10 protein) (HCV NS2 trans-regulated protein, NS2TP)	CHCHD2 C7orf17 AAG10	+			GOCC							+	6
P46379	BAG6_HUMAN	Large proline-rich protein BAG6 (BAG family molecular chaperone regulator 6) (BCL2-associated athanogene 6, BAG-6) (HLA-B-associated transcript 3) (Protein G3) (Protein Scythe)	BAG6 BAT3 G3	+			GOCC							+	6
Q5XKP0	MIC13_HUMAN	MICOS complex subunit MIC13 (Protein P117)	MICOS13 C19orf70 MIC13 QIL1	+			GOCC		+						6
P60866	RS20_HUMAN	40S ribosomal protein S20 (Small ribosomal subunit protein uS10)	RPS20	+			GOCC							+	6
P30049	ATPD_HUMAN	ATP synthase subunit delta, mitochondrial (ATP synthase F1 subunit delta) (F-ATPase delta subunit)	ATP5F1D ATP5D	+			GOCC		+						6
Q9Y3L5	RAP2C_HUMAN	Ras-related protein Rap-2c, EC 3.6.5.2	RAP2C	+			GOCC	+					+		6
O14521	DHSD_HUMAN	Succinate dehydrogenase [ubiquinone] cytochrome b small subunit, mitochondrial, CybS (CII-4) (QPs3) (Succinate dehydrogenase complex subunit D) (Succinate-ubiquinone oxidoreductase cytochrome b small subunit) (Succinate-ubiquinone reductase membrane anchor subunit)	SDHD SDH4	+			GOCC		+						6
Q13057	COASY_HUMAN	Bifunctional coenzyme A synthase, CoA synthase (NBP) (POV-2) [Includes: Phosphopantetheine adenylyltransferase, EC 2.7.7.3 (Dephospho-CoA pyrophosphorylase) (Pantetheine-phosphate adenylyltransferase, PPAT); Dephospho-CoA kinase, DPCK, EC 2.7.1.24 (Dephosphocoenzyme A kinase, DPCOAK) ]	COASY PSEC0106	+			GOCC		+						6
P61923	COPZ1_HUMAN	Coatomer subunit zeta-1 (Zeta-1-coat protein, Zeta-1 COP)	COPZ1 COPZ CGI-120 HSPC181	+			GOCC				+	+			6
Q96CW1	AP2M1_HUMAN	AP-2 complex subunit mu (AP-2 mu chain) (Adaptin-mu2) (Adaptor protein complex AP-2 subunit mu) (Adaptor-related protein complex 2 subunit mu) (Clathrin assembly protein complex 2 mu medium chain) (Clathrin coat assembly protein AP50) (Clathrin coat-associated protein AP50) (HA2 50 kDa subunit) (Plasma membrane adaptor AP-2 50 kDa protein)	AP2M1 CLAPM1 KIAA0109	+			GOCC	+					+		6
P63218	GBG5_HUMAN	Guanine nucleotide-binding protein G(I)/G(S)/G(O) subunit gamma-5	GNG5 GNGT5	+			GOCC	+							6
P15954	COX7C_HUMAN	Cytochrome c oxidase subunit 7C, mitochondrial (Cytochrome c oxidase polypeptide VIIc)	COX7C	+			GOCC		+						6
P15924	DESP_HUMAN	Desmoplakin, DP (250/210 kDa paraneoplastic pemphigus antigen)	DSP	+			GOCC	+							5
Q8WYP5	ELYS_HUMAN	Protein ELYS (Embryonic large molecule derived from yolk sac) (Protein MEL-28) (Putative AT-hook-containing transcription factor 1)	AHCTF1 ELYS TMBS62 MSTP108	+			GOCC			+					5
Q15006	EMC2_HUMAN	ER membrane protein complex subunit 2 (Tetratricopeptide repeat protein 35, TPR repeat protein 35)	EMC2 KIAA0103 TTC35	+			GOCC					+			5
P21980	TGM2_HUMAN	Protein-glutamine gamma-glutamyltransferase 2, EC 2.3.2.13 (Erythrocyte transglutaminase) (Heart G alpha(h), hhG alpha(h)) (Isopeptidase TGM2, EC 3.4.-.-) (Protein G alpha(h), G(h)) (Protein-glutamine deamidase TGM2, EC 3.5.1.44) (Protein-glutamine dopaminyltransferase TGM2, EC 2.3.1.-) (Protein-glutamine histaminyltransferase TGM2, EC 2.3.1.-) (Protein-glutamine noradrenalinyltransferase TGM2, E…	TGM2	+			GOCC	+							5
Q9Y262	EIF3L_HUMAN	Eukaryotic translation initiation factor 3 subunit L, eIF3l (Eukaryotic translation initiation factor 3 subunit 6-interacting protein) (Eukaryotic translation initiation factor 3 subunit E-interacting protein)	EIF3L EIF3EIP EIF3S6IP HSPC021 HSPC025 MSTP005	+			GOCC							+	5
P22307	SCP2_HUMAN	Sterol carrier protein 2, SCP-2 (Acetyl-CoA C-myristoyltransferase, EC 2.3.1.155) (Non-specific lipid-transfer protein, NSL-TP) (Propanoyl-CoA C-acyltransferase, EC 2.3.1.176) (SCP-2/3-oxoacyl-CoA thiolase) (SCP-2/thiolase, EC 2.3.1.16) (SCP-chi) (SCPX) (Sterol carrier protein X, SCP-X)	SCP2	+			GOCC							+	5
Q13185	CBX3_HUMAN	Chromobox protein homolog 3 (HECH) (Heterochromatin protein 1 homolog gamma, HP1 gamma) (Modifier 2 protein)	CBX3	+			GOCC			+					5
Q14247	SRC8_HUMAN	Src substrate cortactin (Amplaxin) (Oncogene EMS1)	CTTN EMS1	+			GOCC	+							5
Q5M775	CYTSB_HUMAN	Cytospin-B (Nuclear structure protein 5, NSP5) (Sperm antigen HCMOGT-1) (Sperm antigen with calponin homology and coiled-coil domains 1)	SPECC1 CYTSB NSP5	+			GOCC							+	5
Q15436	SC23A_HUMAN	Protein transport protein Sec23A, hSec23A (SEC23-related protein A)	SEC23A	+			GOCC				+	+	+		5
P51151	RAB9A_HUMAN	Ras-related protein Rab-9A	RAB9A RAB9	+			GOCC	+			+	+	+		5
Q08379	GOGA2_HUMAN	Golgin subfamily A member 2 (130 kDa cis-Golgi matrix protein, GM130) (GM130 autoantigen) (Golgin-95)	GOLGA2	+			GOCC				+	+			5
Q16658	FSCN1_HUMAN	Fascin (55 kDa actin-bundling protein) (Singed-like protein) (p55)	FSCN1 FAN1 HSN SNL	+			GOCC							+	5
Q7Z3B4	NUP54_HUMAN	Nucleoporin p54 (54 kDa nucleoporin)	NUP54	+			GOCC			+					5
P05121	PAI1_HUMAN	Plasminogen activator inhibitor 1, PAI, PAI-1 (Endothelial plasminogen activator inhibitor) (Serpin E1)	SERPINE1 PAI1 PLANH1	+			GOCC	+							5
Q15654	TRIP6_HUMAN	Thyroid receptor-interacting protein 6, TR-interacting protein 6, TRIP-6 (Opa-interacting protein 1, OIP-1) (Zyxin-related protein 1, ZRP-1)	TRIP6 OIP1	+			GOCC	+							5
P36957	ODO2_HUMAN	Dihydrolipoyllysine-residue succinyltransferase component of 2-oxoglutarate dehydrogenase complex, mitochondrial, EC 2.3.1.61 (2-oxoglutarate dehydrogenase complex component E2, OGDC-E2) (Dihydrolipoamide succinyltransferase component of 2-oxoglutarate dehydrogenase complex) (E2K)	DLST DLTS	+			GOCC							+	5
P54578	UBP14_HUMAN	Ubiquitin carboxyl-terminal hydrolase 14, EC 3.4.19.12 (Deubiquitinating enzyme 14) (Ubiquitin thioesterase 14) (Ubiquitin-specific-processing protease 14)	USP14 TGT	+			GOCC	+							5
P50336	PPOX_HUMAN	Protoporphyrinogen oxidase, PPO, EC 1.3.3.4	PPOX	+			GOCC		+						5
P53992	SC24C_HUMAN	Protein transport protein Sec24C (SEC24-related protein C)	SEC24C KIAA0079	+			GOCC					+	+		5
P82650	RT22_HUMAN	28S ribosomal protein S22, mitochondrial, MRP-S22, S22mt (Mitochondrial small ribosomal subunit protein mS22)	MRPS22 C3orf5 RPMS22 GK002	+			GOCC		+						5
P50552	VASP_HUMAN	Vasodilator-stimulated phosphoprotein, VASP	VASP	+			GOCC	+							5
Q9H078	CLPB_HUMAN	Caseinolytic peptidase B protein homolog, EC 3.6.1.- (Suppressor of potassium transport defect 3)	CLPB HSP78 SKD3	+			GOCC							+	5
O75489	NDUS3_HUMAN	NADH dehydrogenase [ubiquinone] iron-sulfur protein 3, mitochondrial, EC 7.1.1.2 (Complex I-30kD, CI-30kD) (NADH-ubiquinone oxidoreductase 30 kDa subunit)	NDUFS3	+			GOCC		+						5
P21397	AOFA_HUMAN	Amine oxidase [flavin-containing] A, EC 1.4.3.21, EC 1.4.3.4 (Monoamine oxidase type A, MAO-A)	MAOA	+			GOCC		+						5
Q9UQ80	PA2G4_HUMAN	Proliferation-associated protein 2G4 (Cell cycle protein p38-2G4 homolog, hG4-1) (ErbB3-binding protein 1)	PA2G4 EBP1	+			GOCC							+	5
Q9HC21	TPC_HUMAN	Mitochondrial thiamine pyrophosphate carrier (Mitochondrial uncoupling protein 1) (Solute carrier family 25 member 19)	SLC25A19 DNC MUP1	+			GOCC		+						5
Q14152	EIF3A_HUMAN	Eukaryotic translation initiation factor 3 subunit A, eIF3a (Eukaryotic translation initiation factor 3 subunit 10) (eIF-3-theta) (eIF3 p167) (eIF3 p180) (eIF3 p185)	EIF3A EIF3S10 KIAA0139	+			GOCC							+	5
P51159	RB27A_HUMAN	Ras-related protein Rab-27A, Rab-27, EC 3.6.5.2 (GTP-binding protein Ram)	RAB27A RAB27	+			GOCC	+							5
Q12906	ILF3_HUMAN	Interleukin enhancer-binding factor 3 (Double-stranded RNA-binding protein 76, DRBP76) (M-phase phosphoprotein 4, MPP4) (Nuclear factor associated with dsRNA, NFAR) (Nuclear factor of activated T-cells 90 kDa, NF-AT-90) (Translational control protein 80, TCP80)	ILF3 DRBF MPHOSPH4 NF90	+			GOCC							+	5
Q99615	DNJC7_HUMAN	DnaJ homolog subfamily C member 7 (Tetratricopeptide repeat protein 2, TPR repeat protein 2)	DNAJC7 TPR2 TTC2	+			GOCC							+	5
Q8IVF2	AHNK2_HUMAN	Protein AHNAK2	AHNAK2 C14orf78 KIAA2019	+			GOCC	+							5
Q5JTH9	RRP12_HUMAN	RRP12-like protein	RRP12 KIAA0690	+			GOCC	+		+					5
Q5RI15	COX20_HUMAN	Cytochrome c oxidase assembly protein COX20, mitochondrial	COX20 FAM36A	+			GOCC		+						5
Q68EM7	RHG17_HUMAN	Rho GTPase-activating protein 17 (Rho-type GTPase-activating protein 17) (RhoGAP interacting with CIP4 homologs protein 1, RICH-1)	ARHGAP17 RICH1 MSTP066 MSTP110	+			GOCC	+							5
P62191	PRS4_HUMAN	26S proteasome regulatory subunit 4, P26s4 (26S proteasome AAA-ATPase subunit RPT2) (Proteasome 26S subunit ATPase 1)	PSMC1	+			GOCC							+	5
Q9Y6Y8	S23IP_HUMAN	SEC23-interacting protein (p125)	SEC23IP MSTP053	+			GOCC				+	+	+		5
Q14160	SCRIB_HUMAN	Protein scribble homolog, Scribble, hScrib (Protein LAP4)	SCRIB CRIB1 KIAA0147 LAP4 SCRB1 VARTUL	+			GOCC	+							5
P46459	NSF_HUMAN	Vesicle-fusing ATPase, EC 3.6.4.6 (N-ethylmaleimide-sensitive fusion protein, NEM-sensitive fusion protein) (Vesicular-fusion protein NSF)	NSF	+			GOCC	+					+		5
O94979	SC31A_HUMAN	Protein transport protein Sec31A (ABP125) (ABP130) (SEC31-like protein 1) (SEC31-related protein A) (Web1-like protein)	SEC31A KIAA0905 SEC31L1 HSPC275 HSPC334	+			GOCC					+	+		5
Q14203	DCTN1_HUMAN	Dynactin subunit 1 (150 kDa dynein-associated polypeptide) (DAP-150, DP-150) (p135) (p150-glued)	DCTN1	+			GOCC			+					5
O00299	CLIC1_HUMAN	Chloride intracellular channel protein 1 (Chloride channel ABP) (Nuclear chloride ion channel 27, NCC27) (Regulatory nuclear chloride ion channel protein, hRNCC)	CLIC1 G6 NCC27	+			GOCC	+		+					5
P01111	RASN_HUMAN	GTPase NRas, EC 3.6.5.2 (Transforming protein N-Ras)	NRAS HRAS1	+			GOCC	+			+	+			5
P61289	PSME3_HUMAN	Proteasome activator complex subunit 3 (11S regulator complex subunit gamma, REG-gamma) (Activator of multicatalytic protease subunit 3) (Ki nuclear autoantigen) (Proteasome activator 28 subunit gamma, PA28g, PA28gamma)	PSME3	+			GOCC							+	5
O95563	MPC2_HUMAN	Mitochondrial pyruvate carrier 2 (Brain protein 44)	MPC2 BRP44	+			GOCC		+						5
Q7LGA3	HS2ST_HUMAN	Heparan sulfate 2-O-sulfotransferase 1, 2-O-sulfotransferase, 2OST, EC 2.8.2.-	HS2ST1 HS2ST KIAA0448	+			GOCC				+				4
Q9Y5U8	MPC1_HUMAN	Mitochondrial pyruvate carrier 1 (Brain protein 44-like protein)	MPC1 BRP44L CGI-129 HSPC040 PNAS-115	+			GOCC		+						4
Q9P289	STK26_HUMAN	Serine/threonine-protein kinase 26, EC 2.7.11.1 (MST3 and SOK1-related kinase) (Mammalian STE20-like protein kinase 4, MST-4, STE20-like kinase MST4) (Serine/threonine-protein kinase MASK)	STK26 MASK MST4	+			GOCC	+					+		4
Q9UBQ5	EIF3K_HUMAN	Eukaryotic translation initiation factor 3 subunit K, eIF3k (Eukaryotic translation initiation factor 3 subunit 12) (Muscle-specific gene M9 protein) (PLAC-24) (eIF-3 p25) (eIF-3 p28)	EIF3K EIF3S12 ARG134 HSPC029 MSTP001 PTD001	+			GOCC							+	4
Q15382	RHEB_HUMAN	GTP-binding protein Rheb (Ras homolog enriched in brain)	RHEB RHEB2	+			GOCC	+			+	+	+		4
Q12792	TWF1_HUMAN	Twinfilin-1 (Protein A6) (Protein tyrosine kinase 9)	TWF1 PTK9	+			GOCC							+	4
Q8N0X7	SPART_HUMAN	Spartin (Spastic paraplegia 20 protein) (Trans-activated by hepatitis C virus core protein 1)	SPART KIAA0610 SPG20 TAHCCP1	+			GOCC	+	+						4
P48449	LSS_HUMAN	Lanosterol synthase, EC 5.4.99.7 (2,3-epoxysqualene--lanosterol cyclase) (Oxidosqualene--lanosterol cyclase, OSC, hOSC)	LSS OSC	+			GOCC					+			4
O75083	WDR1_HUMAN	WD repeat-containing protein 1 (Actin-interacting protein 1, AIP1) (NORI-1)	WDR1	+			GOCC	+							4
O15294	OGT1_HUMAN	UDP-N-acetylglucosamine--peptide N-acetylglucosaminyltransferase 110 kDa subunit, EC 2.4.1.255 (O-GlcNAc transferase subunit p110) (O-linked N-acetylglucosamine transferase 110 kDa subunit, OGT)	OGT	+			GOCC	+	+						4
P43246	MSH2_HUMAN	DNA mismatch repair protein Msh2, hMSH2 (MutS protein homolog 2)	MSH2	+			GOCC							+	4
P12259	FA5_HUMAN	Coagulation factor V (Activated protein C cofactor) (Proaccelerin, labile factor) [Cleaved into: Coagulation factor V heavy chain; Coagulation factor V light chain ]	F5	+			GOCC	+			+	+			4
Q9BQG0	MBB1A_HUMAN	Myb-binding protein 1A	MYBBP1A P160	+			GOCC							+	4
P78344	IF4G2_HUMAN	Eukaryotic translation initiation factor 4 gamma 2, eIF-4-gamma 2, eIF-4G 2, eIF4G 2 (Death-associated protein 5, DAP-5) (p97)	EIF4G2 DAP5 OK/SW-cl.75	+			GOCC							+	4
O15270	SPTC2_HUMAN	Serine palmitoyltransferase 2, EC 2.3.1.50 (Long chain base biosynthesis protein 2, LCB 2) (Long chain base biosynthesis protein 2a, LCB2a) (Serine-palmitoyl-CoA transferase 2, SPT 2)	SPTLC2 KIAA0526 LCB2	+			GOCC					+			4
P47755	CAZA2_HUMAN	F-actin-capping protein subunit alpha-2 (CapZ alpha-2)	CAPZA2	+			GOCC							+	4
P02647	APOA1_HUMAN	Apolipoprotein A-I, Apo-AI, ApoA-I (Apolipoprotein A1) [Cleaved into: Proapolipoprotein A-I, ProapoA-I; Truncated apolipoprotein A-I (Apolipoprotein A-I(1-242)) ]	APOA1	+			GOCC	+							4
P62333	PRS10_HUMAN	26S proteasome regulatory subunit 10B (26S proteasome AAA-ATPase subunit RPT4) (Proteasome 26S subunit ATPase 6) (Proteasome subunit p42)	PSMC6 SUG2	+			GOCC							+	4
Q8IZ81	ELMD2_HUMAN	ELMO domain-containing protein 2	ELMOD2	+			GOCC							+	4
P38159	RBMX_HUMAN	RNA-binding motif protein, X chromosome (Glycoprotein p43) (Heterogeneous nuclear ribonucleoprotein G, hnRNP G) [Cleaved into: RNA-binding motif protein, X chromosome, N-terminally processed ]	RBMX HNRPG RBMXP1	+			GOCC							+	4
P43353	AL3B1_HUMAN	Aldehyde dehydrogenase family 3 member B1, EC 1.2.1.28, EC 1.2.1.5, EC 1.2.1.7 (Aldehyde dehydrogenase 7)	ALDH3B1 ALDH7	+			GOCC	+							4
O43865	SAHH2_HUMAN	S-adenosylhomocysteine hydrolase-like protein 1 (DC-expressed AHCY-like molecule) (IP(3)Rs binding protein released with IP(3), IRBIT) (Putative adenosylhomocysteinase 2) (S-adenosyl-L-homocysteine hydrolase 2, AdoHcyase 2)	AHCYL1 DCAL IRBIT XPVKONA	+			GOCC	+				+			4
Q9Y6M0	TEST_HUMAN	Testisin, EC 3.4.21.- (Eosinophil serine protease 1, ESP-1) (Serine protease 21)	PRSS21 ESP1 TEST1 UNQ266/PRO303	+			GOCC	+							4
P00747	PLMN_HUMAN	Plasminogen, EC 3.4.21.7 [Cleaved into: Plasmin heavy chain A; Activation peptide; Angiostatin; Plasmin heavy chain A, short form; Plasmin light chain B ]	PLG	+			GOCC	+							4
O96019	ACL6A_HUMAN	Actin-like protein 6A (53 kDa BRG1-associated factor A) (Actin-related protein Baf53a) (ArpNbeta) (BRG1-associated factor 53A, BAF53A) (INO80 complex subunit K)	ACTL6A BAF53 BAF53A INO80K	+			GOCC	+							4
O75438	NDUB1_HUMAN	NADH dehydrogenase [ubiquinone] 1 beta subcomplex subunit 1 (Complex I-MNLL, CI-MNLL) (NADH-ubiquinone oxidoreductase MNLL subunit)	NDUFB1	+			GOCC		+						4
P62266	RS23_HUMAN	40S ribosomal protein S23 (Small ribosomal subunit protein uS12)	RPS23	+			GOCC							+	4
P35606	COPB2_HUMAN	Coatomer subunit beta' (Beta'-coat protein, Beta'-COP) (p102)	COPB2	+			GOCC				+	+			4
Q6P2E9	EDC4_HUMAN	Enhancer of mRNA-decapping protein 4 (Autoantigen Ge-1) (Autoantigen RCD-8) (Human enhancer of decapping large subunit, Hedls)	EDC4 HEDLS	+			GOCC							+	4
Q9Y2A7	NCKP1_HUMAN	Nck-associated protein 1, NAP 1 (Membrane-associated protein HEM-2) (p125Nap1)	NCKAP1 HEM2 KIAA0587 NAP1	+			GOCC							+	4
P06239	LCK_HUMAN	Tyrosine-protein kinase Lck, EC 2.7.10.2 (Leukocyte C-terminal Src kinase, LSK) (Lymphocyte cell-specific protein-tyrosine kinase) (Protein YT16) (Proto-oncogene Lck) (T cell-specific protein-tyrosine kinase) (p56-LCK)	LCK	+			GOCC	+							4
Q9NVP1	DDX18_HUMAN	ATP-dependent RNA helicase DDX18, EC 3.6.4.13 (DEAD box protein 18) (Myc-regulated DEAD box protein, MrDb)	DDX18 cPERP-D	+			GOCC							+	4
Q9UNF1	MAGD2_HUMAN	Melanoma-associated antigen D2 (11B6) (Breast cancer-associated gene 1 protein, BCG-1) (Hepatocellular carcinoma-associated protein JCL-1) (MAGE-D2 antigen)	MAGED2 BCG1	+			GOCC							+	4
P21281	VATB2_HUMAN	V-type proton ATPase subunit B, brain isoform, V-ATPase subunit B 2 (Endomembrane proton pump 58 kDa subunit) (HO57) (Vacuolar proton pump subunit B 2)	ATP6V1B2 ATP6B2 VPP3	+			GOCC	+					+		4
Q9Y2Q5	LTOR2_HUMAN	Ragulator complex protein LAMTOR2 (Endosomal adaptor protein p14) (Late endosomal/lysosomal Mp1-interacting protein) (Late endosomal/lysosomal adaptor and MAPK and MTOR activator 2) (Mitogen-activated protein-binding protein-interacting protein, MAPBP-interacting protein) (Roadblock domain-containing protein 3)	LAMTOR2 MAPBPIP ROBLD3 HSPC003	+			GOCC	+					+		4
Q02750	MP2K1_HUMAN	Dual specificity mitogen-activated protein kinase kinase 1, MAP kinase kinase 1, MAPKK 1, MKK1, EC 2.7.12.2 (ERK activator kinase 1) (MAPK/ERK kinase 1, MEK 1)	MAP2K1 MEK1 PRKMK1	+			GOCC	+							4
Q68D91	MBLC2_HUMAN	Acyl-coenzyme A thioesterase MBLAC2, Acyl-CoA thioesterase MBLAC2, EC 3.1.2.2 (Beta-lactamase MBLAC2, EC 3.5.2.6) (Metallo-beta-lactamase domain-containing protein 2) (Palmitoyl-coenzyme A thioesterase MBLAC2)	MBLAC2	+			GOCC	+				+			4
Q9Y375	CIA30_HUMAN	Complex I intermediate-associated protein 30, mitochondrial (NADH dehydrogenase [ubiquinone] 1 alpha subcomplex assembly factor 1)	NDUFAF1 CIA30 CGI-65	+			GOCC		+						4
P53990	IST1_HUMAN	IST1 homolog, hIST1 (Charged multivesicular body protein 8, CHMP8) (Putative MAPK-activating protein PM28)	IST1 KIAA0174	+			GOCC			+	+	+			4
P30044	PRDX5_HUMAN	Peroxiredoxin-5, mitochondrial, EC 1.11.1.24 (Alu corepressor 1) (Antioxidant enzyme B166, AOEB166) (Liver tissue 2D-page spot 71B) (PLP) (Peroxiredoxin V, Prx-V) (Peroxisomal antioxidant enzyme) (TPx type VI) (Thioredoxin peroxidase PMP20) (Thioredoxin-dependent peroxiredoxin 5)	PRDX5 ACR1 SBBI10	+			GOCC							+	4
P35354	PGH2_HUMAN	Prostaglandin G/H synthase 2, EC 1.14.99.1 (Cyclooxygenase-2, COX-2) (PHS II) (Prostaglandin H2 synthase 2, PGH synthase 2, PGHS-2) (Prostaglandin-endoperoxide synthase 2)	PTGS2 COX2	+			GOCC			+		+			4
Q08499	PDE4D_HUMAN	cAMP-specific 3',5'-cyclic phosphodiesterase 4D, EC 3.1.4.53 (DPDE3) (PDE43)	PDE4D DPDE3	+			GOCC	+							4
Q9UMY4	SNX12_HUMAN	Sorting nexin-12	SNX12	+			GOCC						+		4
Q3SYG4	PTHB1_HUMAN	Protein PTHB1 (Bardet-Biedl syndrome 9 protein) (Parathyroid hormone-responsive B1 gene protein)	BBS9 PTHB1	+			GOCC							+	4
P24311	COX7B_HUMAN	Cytochrome c oxidase subunit 7B, mitochondrial (Cytochrome c oxidase polypeptide VIIb)	COX7B	+			GOCC		+						4
O00429	DNM1L_HUMAN	Dynamin-1-like protein, EC 3.6.5.5 (Dnm1p/Vps1p-like protein, DVLP) (Dynamin family member proline-rich carboxyl-terminal domain less, Dymple) (Dynamin-like protein) (Dynamin-like protein 4) (Dynamin-like protein IV, HdynIV) (Dynamin-related protein 1)	DNM1L DLP1 DRP1	+			GOCC		+			+	+		3
P98160	PGBM_HUMAN	Basement membrane-specific heparan sulfate proteoglycan core protein, HSPG (Perlecan, PLC) [Cleaved into: Endorepellin; LG3 peptide ]	HSPG2	+			GOCC	+							3
Q9BZZ5	API5_HUMAN	Apoptosis inhibitor 5, API-5 (Antiapoptosis clone 11 protein, AAC-11) (Cell migration-inducing gene 8 protein) (Fibroblast growth factor 2-interacting factor, FIF) (Protein XAGL)	API5 MIG8	+			GOCC							+	3
O43294	TGFI1_HUMAN	Transforming growth factor beta-1-induced transcript 1 protein (Androgen receptor coactivator 55 kDa protein) (Androgen receptor-associated protein of 55 kDa) (Hydrogen peroxide-inducible clone 5 protein, Hic-5)	TGFB1I1 ARA55	+			GOCC	+							3
P82930	RT34_HUMAN	28S ribosomal protein S34, mitochondrial, MRP-S34, S34mt (Mitochondrial small ribosomal subunit protein mS34)	MRPS34	+			GOCC		+						3
Q8NE71	ABCF1_HUMAN	ATP-binding cassette sub-family F member 1 (ATP-binding cassette 50) (TNF-alpha-stimulated ABC protein)	ABCF1 ABC50	+			GOCC			+					3
Q14699	RFTN1_HUMAN	Raftlin (Cell migration-inducing gene 2 protein) (Raft-linking protein)	RFTN1 KIAA0084 MIG2	+			GOCC	+							3
P14868	SYDC_HUMAN	Aspartate--tRNA ligase, cytoplasmic, EC 6.1.1.12 (Aspartyl-tRNA synthetase, AspRS) (Cell proliferation-inducing gene 40 protein)	DARS1 DARS PIG40	+			GOCC							+	3
P51114	FXR1_HUMAN	RNA-binding protein FXR1 (FMR1 autosomal homolog 1) (hFXR1p)	FXR1	+			GOCC							+	3
P51665	PSMD7_HUMAN	26S proteasome non-ATPase regulatory subunit 7 (26S proteasome regulatory subunit RPN8) (26S proteasome regulatory subunit S12) (Mov34 protein homolog) (Proteasome subunit p40)	PSMD7 MOV34L	+			GOCC							+	3
O76031	CLPX_HUMAN	ATP-dependent Clp protease ATP-binding subunit clpX-like, mitochondrial	CLPX	+			GOCC		+						3
Q03405	UPAR_HUMAN	Urokinase plasminogen activator surface receptor, U-PAR, uPAR (Monocyte activation antigen Mo3) (CD antigen CD87)	PLAUR MO3 UPAR	+			GOCC	+				+			3
Q9Y2R5	RT17_HUMAN	28S ribosomal protein S17, mitochondrial, MRP-S17, S17mt (Mitochondrial small ribosomal subunit protein uS17m)	MRPS17 RPMS17 HSPC011	+			GOCC		+						3
Q7Z7H8	RM10_HUMAN	39S ribosomal protein L10, mitochondrial, L10mt, MRP-L10 (39S ribosomal protein L8, mitochondrial, L8mt, MRP-L8) (Mitochondrial large ribosomal subunit protein uL10m)	MRPL10 MRPL8 RPML8	+			GOCC		+						3
Q14764	MVP_HUMAN	Major vault protein, MVP (Lung resistance-related protein)	MVP LRP	+			GOCC							+	3
Q9H444	CHM4B_HUMAN	Charged multivesicular body protein 4b (Chromatin-modifying protein 4b, CHMP4b) (SNF7 homolog associated with Alix 1) (SNF7-2, hSnf7-2) (Vacuolar protein sorting-associated protein 32-2, Vps32-2, hVps32-2)	CHMP4B C20orf178 SHAX1	+			GOCC	+		+			+		3
Q93096	TP4A1_HUMAN	Protein tyrosine phosphatase type IVA 1, EC 3.1.3.48 (PTP(CAAXI)) (Protein-tyrosine phosphatase 4a1) (Protein-tyrosine phosphatase of regenerating liver 1, PRL-1)	PTP4A1 PRL1 PTPCAAX1	+			GOCC	+							3
P18065	IBP2_HUMAN	Insulin-like growth factor-binding protein 2, IBP-2, IGF-binding protein 2, IGFBP-2	IGFBP2 BP2 IBP2	+			GOCC	+							3
Q03001	DYST_HUMAN	Dystonin (230 kDa bullous pemphigoid antigen) (230/240 kDa bullous pemphigoid antigen) (Bullous pemphigoid antigen 1, BPA, Bullous pemphigoid antigen) (Dystonia musculorum protein) (Hemidesmosomal plaque protein)	DST BP230 BP240 BPAG1 DMH DT KIAA0728	+			GOCC	+		+		+			3
Q8WVM8	SCFD1_HUMAN	Sec1 family domain-containing protein 1 (SLY1 homolog, Sly1p) (Syntaxin-binding protein 1-like 2)	SCFD1 C14orf163 KIAA0917 STXBP1L2 FKSG23	+			GOCC	+			+	+			3
Q9Y6G9	DC1L1_HUMAN	Cytoplasmic dynein 1 light intermediate chain 1, LIC1 (Dynein light chain A, DLC-A) (Dynein light intermediate chain 1, cytosolic)	DYNC1LI1 DNCLI1	+			GOCC	+							3
Q9NY93	DDX56_HUMAN	Probable ATP-dependent RNA helicase DDX56, EC 3.6.4.13 (ATP-dependent 61 kDa nucleolar RNA helicase) (DEAD box protein 21) (DEAD box protein 56)	DDX56 DDX21 NOH61	+			GOCC							+	3
Q9UNX4	WDR3_HUMAN	WD repeat-containing protein 3	WDR3	+			GOCC			+					3
P61353	RL27_HUMAN	60S ribosomal protein L27 (Large ribosomal subunit protein eL27)	RPL27	+			GOCC					+			3
Q8TCS8	PNPT1_HUMAN	Polyribonucleotide nucleotidyltransferase 1, mitochondrial, EC 2.7.7.8 (3'-5' RNA exonuclease OLD35) (PNPase old-35) (Polynucleotide phosphorylase 1, PNPase 1) (Polynucleotide phosphorylase-like protein)	PNPT1 PNPASE	+			GOCC					+			3
Q8N490	PNKD_HUMAN	Probable hydrolase PNKD, EC 3.-.-.- (Myofibrillogenesis regulator 1, MR-1) (Paroxysmal nonkinesiogenic dyskinesia protein) (Trans-activated by hepatitis C virus core protein 2)	PNKD KIAA1184 MR1 TAHCCP2 FKSG19 UNQ2491/PRO5778	+			GOCC							+	3
O15228	GNPAT_HUMAN	Dihydroxyacetone phosphate acyltransferase, DAP-AT, DHAP-AT, EC 2.3.1.42 (Acyl-CoA:dihydroxyacetonephosphateacyltransferase) (Glycerone-phosphate O-acyltransferase)	GNPAT DAPAT DHAPAT	+			GOCC		+				+		3
Q13131	AAPK1_HUMAN	5'-AMP-activated protein kinase catalytic subunit alpha-1, AMPK subunit alpha-1, EC 2.7.11.1 (Acetyl-CoA carboxylase kinase, ACACA kinase, EC 2.7.11.27) (Hydroxymethylglutaryl-CoA reductase kinase, HMGCR kinase, EC 2.7.11.31) (Tau-protein kinase PRKAA1, EC 2.7.11.26)	PRKAA1 AMPK1	+			GOCC	+							3
P29400	CO4A5_HUMAN	Collagen alpha-5(IV) chain	COL4A5	+			GOCC							+	3
Q52LJ0	FA98B_HUMAN	Protein FAM98B	FAM98B	+			GOCC							+	3
Q99653	CHP1_HUMAN	Calcineurin B homologous protein 1 (Calcineurin B-like protein) (Calcium-binding protein CHP) (Calcium-binding protein p22) (EF-hand calcium-binding domain-containing protein p22)	CHP1 CHP	+			GOCC	+			+	+			3
Q9H7Z7	PGES2_HUMAN	Prostaglandin E synthase 2, EC 5.3.99.3 (Membrane-associated prostaglandin E synthase-2, mPGE synthase-2) (Microsomal prostaglandin E synthase 2, mPGES-2) (Prostaglandin-H(2) E-isomerase) [Cleaved into: Prostaglandin E synthase 2 truncated form ]	PTGES2 C9orf15 PGES2	+			GOCC				+				3
Q02388	CO7A1_HUMAN	Collagen alpha-1(VII) chain (Long-chain collagen, LC collagen)	COL7A1	+			GOCC				+	+			3
Q12904	AIMP1_HUMAN	Aminoacyl tRNA synthase complex-interacting multifunctional protein 1 (Multisynthase complex auxiliary component p43) [Cleaved into: Endothelial monocyte-activating polypeptide 2, EMAP-2 (Endothelial monocyte-activating polypeptide II, EMAP-II) (Small inducible cytokine subfamily E member 1) ]	AIMP1 EMAP2 SCYE1	+			GOCC	+							3
Q8WWM7	ATX2L_HUMAN	Ataxin-2-like protein (Ataxin-2 domain protein) (Ataxin-2-related protein)	ATXN2L A2D A2LG A2LP A2RP	+			GOCC							+	3
P48444	COPD_HUMAN	Coatomer subunit delta (Archain) (Delta-coat protein, Delta-COP)	ARCN1 COPD	+			GOCC				+	+			3
Q10713	MPPA_HUMAN	Mitochondrial-processing peptidase subunit alpha (Alpha-MPP) (Inactive zinc metalloprotease alpha) (P-55)	PMPCA INPP5E KIAA0123 MPPA	+			GOCC		+						3
P55290	CAD13_HUMAN	Cadherin-13 (Heart cadherin, H-cadherin) (P105) (Truncated cadherin, T-cad, T-cadherin)	CDH13 CDHH	+			GOCC	+							3
P67809	YBOX1_HUMAN	Y-box-binding protein 1, YB-1 (CCAAT-binding transcription factor I subunit A, CBF-A) (DNA-binding protein B, DBPB) (Enhancer factor I subunit A, EFI-A) (Nuclease-sensitive element-binding protein 1) (Y-box transcription factor)	YBX1 NSEP1 YB1	+			GOCC	+							3
Q86TG7	PEG10_HUMAN	Retrotransposon-derived protein PEG10 (Embryonal carcinoma differentiation-regulated protein) (Mammalian retrotransposon-derived protein 2) (Myelin expression factor 3-like protein 1, MEF3-like protein 1) (Paternally expressed gene 10 protein) (Retrotransposon gag domain-containing protein 3) (Retrotransposon-derived gag-like polyprotein) (Ty3/Gypsy-like protein)	PEG10 EDR KIAA1051e MAR2 MART2 MEF3L1 RGAG3	+			GOCC							+	3
Q02809	PLOD1_HUMAN	Procollagen-lysine,2-oxoglutarate 5-dioxygenase 1, EC 1.14.11.4 (Lysyl hydroxylase 1, LH1)	PLOD1 LLH PLOD	+			GOCC					+			3
Q9H4F8	SMOC1_HUMAN	SPARC-related modular calcium-binding protein 1 (Secreted modular calcium-binding protein 1, SMOC-1)	SMOC1	+			GOCC							+	3
P24666	PPAC_HUMAN	Low molecular weight phosphotyrosine protein phosphatase, LMW-PTP, LMW-PTPase, EC 3.1.3.48 (Adipocyte acid phosphatase) (Low molecular weight cytosolic acid phosphatase, EC 3.1.3.2) (Red cell acid phosphatase 1)	ACP1	+			GOCC	+							3
Q92945	FUBP2_HUMAN	Far upstream element-binding protein 2, FUSE-binding protein 2 (KH type-splicing regulatory protein, KSRP) (p75)	KHSRP FUBP2	+			GOCC							+	3
O43663	PRC1_HUMAN	Protein regulator of cytokinesis 1	PRC1	+			GOCC	+							3
Q9UDY2	ZO2_HUMAN	Tight junction protein ZO-2 (Tight junction protein 2) (Zona occludens protein 2) (Zonula occludens protein 2)	TJP2 X104 ZO2	+			GOCC	+							3
P62070	RRAS2_HUMAN	Ras-related protein R-Ras2, EC 3.6.5.- (Ras-like protein TC21) (Teratocarcinoma oncogene)	RRAS2 TC21	+			GOCC	+			+				3
Q969Q0	RL36L_HUMAN	60S ribosomal protein L36a-like (Large ribosomal subunit protein eL42-like)	RPL36AL	+			GOCC	+							3
Q96RT1	ERBIN_HUMAN	Erbin (Densin-180-like protein) (Erbb2-interacting protein) (Protein LAP2)	ERBIN ERBB2IP KIAA1225 LAP2	+			GOCC	+		+					3
O60216	RAD21_HUMAN	Double-strand-break repair protein rad21 homolog, hHR21 (Nuclear matrix protein 1, NXP-1) (SCC1 homolog) [Cleaved into: 64-kDa C-terminal product (64-kDa carboxy-terminal product) (65-kDa carboxy-terminal product) ]	RAD21 HR21 KIAA0078 NXP1 SCC1	+			GOCC							+	3
Q9Y295	DRG1_HUMAN	Developmentally-regulated GTP-binding protein 1, DRG-1 (Neural precursor cell expressed developmentally down-regulated protein 3, NEDD-3) (Translation factor GTPase DRG1, TRAFAC GTPase DRG1, EC 3.6.5.-)	DRG1 NEDD3	+			GOCC							+	3
O75116	ROCK2_HUMAN	Rho-associated protein kinase 2, EC 2.7.11.1 (Rho kinase 2) (Rho-associated, coiled-coil-containing protein kinase 2) (Rho-associated, coiled-coil-containing protein kinase II, ROCK-II) (p164 ROCK-2)	ROCK2 KIAA0619	+			GOCC	+							3
O95299	NDUAA_HUMAN	NADH dehydrogenase [ubiquinone] 1 alpha subcomplex subunit 10, mitochondrial (Complex I-42kD, CI-42kD) (NADH-ubiquinone oxidoreductase 42 kDa subunit)	NDUFA10	+			GOCC		+						3
P09874	PARP1_HUMAN	Poly [ADP-ribose] polymerase 1, PARP-1, EC 2.4.2.30 (ADP-ribosyltransferase diphtheria toxin-like 1, ARTD1) (DNA ADP-ribosyltransferase PARP1, EC 2.4.2.-) (NAD(+) ADP-ribosyltransferase 1, ADPRT 1) (Poly[ADP-ribose] synthase 1) (Protein poly-ADP-ribosyltransferase PARP1, EC 2.4.2.-)	PARP1 ADPRT PPOL	+			GOCC			+					3
Q92878	RAD50_HUMAN	DNA repair protein RAD50, hRAD50, EC 3.6.-.-	RAD50	+			GOCC							+	3
P50995	ANX11_HUMAN	Annexin A11 (56 kDa autoantigen) (Annexin XI) (Annexin-11) (Calcyclin-associated annexin 50, CAP-50)	ANXA11 ANX11	+			GOCC			+					3
P56589	PEX3_HUMAN	Peroxisomal biogenesis factor 3 (Peroxin-3) (Peroxisomal assembly protein PEX3)	PEX3	+			GOCC						+		3
Q15526	SURF1_HUMAN	Surfeit locus protein 1	SURF1 SURF-1	+			GOCC							+	3
P62854	RS26_HUMAN	40S ribosomal protein S26 (Small ribosomal subunit protein eS26)	RPS26	+			GOCC					+			3
Q9UNM6	PSD13_HUMAN	26S proteasome non-ATPase regulatory subunit 13 (26S proteasome regulatory subunit RPN9) (26S proteasome regulatory subunit S11) (26S proteasome regulatory subunit p40.5)	PSMD13	+			GOCC							+	3
P46783	RS10_HUMAN	40S ribosomal protein S10 (Small ribosomal subunit protein eS10)	RPS10	+			GOCC							+	3
O15498	YKT6_HUMAN	Synaptobrevin homolog YKT6, EC 2.3.1.-	YKT6	+			GOCC	+			+	+	+		3
Q5SGD2	PPM1L_HUMAN	Protein phosphatase 1L, EC 3.1.3.16 (Protein phosphatase 1-like) (Protein phosphatase 2C isoform epsilon, PP2C-epsilon)	PPM1L PP2CE	+			GOCC					+			3
P10644	KAP0_HUMAN	cAMP-dependent protein kinase type I-alpha regulatory subunit (Tissue-specific extinguisher 1, TSE1)	PRKAR1A PKR1 PRKAR1 TSE1	+			GOCC	+							3
Q9Y5J6	T10B_HUMAN	Mitochondrial import inner membrane translocase subunit Tim10 B (Fracture callus protein 1) (FxC1) (Mitochondrial import inner membrane translocase subunit Tim9 B) (TIMM10B, Tim10b)	TIMM10B FXC1 TIM9B TIMM9B	+			GOCC		+						3
Q13595	TRA2A_HUMAN	Transformer-2 protein homolog alpha, TRA-2 alpha, TRA2-alpha (Transformer-2 protein homolog A)	TRA2A	+			GOCC							+	3
Q07960	RHG01_HUMAN	Rho GTPase-activating protein 1 (CDC42 GTPase-activating protein) (GTPase-activating protein rhoGAP) (Rho-related small GTPase protein activator) (Rho-type GTPase-activating protein 1) (p50-RhoGAP)	ARHGAP1 CDC42GAP RHOGAP1	+			GOCC						+		3
P63165	SUMO1_HUMAN	Small ubiquitin-related modifier 1, SUMO-1 (GAP-modifying protein 1, GMP1) (SMT3 homolog 3) (Sentrin) (Ubiquitin-homology domain protein PIC1) (Ubiquitin-like protein SMT3C, Smt3C) (Ubiquitin-like protein UBL1)	SUMO1 SMT3C SMT3H3 UBL1 OK/SW-cl.43	+			GOCC	+		+					3
P0C0L4	CO4A_HUMAN	Complement C4-A (Acidic complement C4) (C3 and PZP-like alpha-2-macroglobulin domain-containing protein 2) [Cleaved into: Complement C4 beta chain; Complement C4-A alpha chain; C4a anaphylatoxin; C4b-A; C4d-A; Complement C4 gamma chain ]	C4A CO4 CPAMD2	+			GOCC	+							3
Q8N6H7	ARFG2_HUMAN	ADP-ribosylation factor GTPase-activating protein 2, ARF GAP 2 (GTPase-activating protein ZNF289) (Zinc finger protein 289)	ARFGAP2 ZNF289 Nbla10535	+			GOCC	+			+				3
O75880	SCO1_HUMAN	Protein SCO1 homolog, mitochondrial	SCO1 SCOD1	+			GOCC		+						3
Q9Y285	SYFA_HUMAN	Phenylalanine--tRNA ligase alpha subunit, EC 6.1.1.20 (CML33) (Phenylalanyl-tRNA synthetase alpha subunit, PheRS)	FARSA FARS FARSL FARSLA	+			GOCC							+	3
O43747	AP1G1_HUMAN	AP-1 complex subunit gamma-1 (Adaptor protein complex AP-1 subunit gamma-1) (Adaptor-related protein complex 1 subunit gamma-1) (Clathrin assembly protein complex 1 gamma-1 large chain) (Gamma1-adaptin) (Golgi adaptor HA1/AP1 adaptin subunit gamma-1)	AP1G1 ADTG CLAPG1	+			GOCC				+		+		3
Q7Z6G8	ANS1B_HUMAN	Ankyrin repeat and sterile alpha motif domain-containing protein 1B (Amyloid-beta protein intracellular domain-associated protein 1, AIDA-1) (E2A-PBX1-associated protein, EB-1)	ANKS1B	+			GOCC	+							3
Q9NU22	MDN1_HUMAN	Midasin (Dynein-related AAA-ATPase MDN1) (MIDAS-containing protein)	MDN1 KIAA0301	+			GOCC							+	3
P61604	CH10_HUMAN	10 kDa heat shock protein, mitochondrial, Hsp10 (10 kDa chaperonin) (Chaperonin 10, CPN10) (Early-pregnancy factor, EPF)	HSPE1	+			GOCC							+	3
Q99732	LITAF_HUMAN	Lipopolysaccharide-induced tumor necrosis factor-alpha factor, LPS-induced TNF-alpha factor (Small integral membrane protein of lysosome/late endosome) (p53-induced gene 7 protein)	LITAF PIG7 SIMPLE	+			GOCC	+			+		+		3
Q9BZD4	NUF2_HUMAN	Kinetochore protein Nuf2, hNuf2, hNuf2R, hsNuf2 (Cell division cycle-associated protein 1)	NUF2 CDCA1 NUF2R	+			GOCC							+	3
P36507	MP2K2_HUMAN	Dual specificity mitogen-activated protein kinase kinase 2, MAP kinase kinase 2, MAPKK 2, EC 2.7.12.2 (ERK activator kinase 2) (MAPK/ERK kinase 2, MEK 2)	MAP2K2 MEK2 MKK2 PRKMK2	+			GOCC	+					+		2
Q15021	CND1_HUMAN	Condensin complex subunit 1 (Chromosome condensation-related SMC-associated protein 1) (Chromosome-associated protein D2, hCAP-D2) (Non-SMC condensin I complex subunit D2) (XCAP-D2 homolog)	NCAPD2 CAPD2 CNAP1 KIAA0159	+			GOCC							+	2
Q13596	SNX1_HUMAN	Sorting nexin-1	SNX1	+			GOCC						+		2
O75608	LYPA1_HUMAN	Acyl-protein thioesterase 1, APT-1, hAPT1, EC 3.1.2.- (Lysophospholipase 1) (Lysophospholipase I, LPL-I, LysoPLA I) (Palmitoyl-protein hydrolase, EC 3.1.2.22)	LYPLA1 APT1 LPL1	+			GOCC	+		+					2
O75534	CSDE1_HUMAN	Cold shock domain-containing protein E1 (N-ras upstream gene protein) (Protein UNR)	CSDE1 D1S155E KIAA0885 NRU UNR	+			GOCC	+							2
Q8N8S7	ENAH_HUMAN	Protein enabled homolog	ENAH MENA	+			GOCC	+							2
Q9Y3D7	TIM16_HUMAN	Mitochondrial import inner membrane translocase subunit TIM16 (Mitochondria-associated granulocyte macrophage CSF-signaling molecule) (Presequence translocated-associated motor subunit PAM16)	PAM16 MAGMAS TIM16 TIMM16 CGI-136	+			GOCC		+						2
P04818	TYSY_HUMAN	Thymidylate synthase, TS, TSase, EC 2.1.1.45	TYMS TS OK/SW-cl.29	+			GOCC		+						2
Q96D53	COQ8B_HUMAN	Atypical kinase COQ8B, mitochondrial, EC 2.7.-.- (AarF domain-containing protein kinase 4) (Coenzyme Q protein 8B)	COQ8B ADCK4	+			GOCC	+	+						2
P54920	SNAA_HUMAN	Alpha-soluble NSF attachment protein, SNAP-alpha (N-ethylmaleimide-sensitive factor attachment protein alpha)	NAPA SNAPA	+			GOCC	+							2
P49790	NU153_HUMAN	Nuclear pore complex protein Nup153 (153 kDa nucleoporin) (Nucleoporin Nup153)	NUP153	+			GOCC			+					2
P20908	CO5A1_HUMAN	Collagen alpha-1(V) chain	COL5A1	+			GOCC							+	2
O95837	GNA14_HUMAN	Guanine nucleotide-binding protein subunit alpha-14, G alpha-14, G-protein subunit alpha-14	GNA14	+			GOCC	+							2
Q16513	PKN2_HUMAN	Serine/threonine-protein kinase N2, EC 2.7.11.13 (PKN gamma) (Protein kinase C-like 2) (Protein-kinase C-related kinase 2)	PKN2 PRK2 PRKCL2	+			GOCC	+							2
P49588	SYAC_HUMAN	Alanine--tRNA ligase, cytoplasmic, EC 6.1.1.7 (Alanyl-tRNA synthetase, AlaRS) (Renal carcinoma antigen NY-REN-42)	AARS1 AARS	+			GOCC							+	2
Q9H4A6	GOLP3_HUMAN	Golgi phosphoprotein 3 (Coat protein GPP34) (Mitochondrial DNA absence factor, MIDAS)	GOLPH3 GPP34	+			GOCC	+			+				2
P57678	GEMI4_HUMAN	Gem-associated protein 4, Gemin-4 (Component of gems 4) (p97)	GEMIN4	+			GOCC							+	2
Q02218	ODO1_HUMAN	2-oxoglutarate dehydrogenase complex component E1, E1o, OGDC-E1, OGDH-E1, EC 1.2.4.2 (2-oxoglutarate dehydrogenase, mitochondrial) (Alpha-ketoglutarate dehydrogenase, Alpha-KGDH-E1) (Thiamine diphosphate (ThDP)-dependent 2-oxoglutarate dehydrogenase)	OGDH	+			GOCC		+						2
Q05682	CALD1_HUMAN	Caldesmon, CDM	CALD1 CAD CDM	+			GOCC	+							2
Q3SXM5	HSDL1_HUMAN	Inactive hydroxysteroid dehydrogenase-like protein 1 (Short chain dehydrogenase/reductase family 12C member 3)	HSDL1 SDR12C3	+			GOCC							+	2
P62847	RS24_HUMAN	40S ribosomal protein S24 (Small ribosomal subunit protein eS24)	RPS24	+			GOCC							+	2
Q9BPX6	MICU1_HUMAN	Calcium uptake protein 1, mitochondrial (Atopy-related autoantigen CALC, ara CALC) (Calcium-binding atopy-related autoantigen 1) (allergen Hom s 4)	MICU1 CALC CBARA1	+			GOCC		+						2
Q96FJ2	DYL2_HUMAN	Dynein light chain 2, cytoplasmic (8 kDa dynein light chain b, DLC8b) (Dynein light chain LC8-type 2)	DYNLL2 DLC2	+			GOCC	+							2
P48739	PIPNB_HUMAN	Phosphatidylinositol transfer protein beta isoform, PI-TP-beta, PtdIns transfer protein beta, PtdInsTP beta	PITPNB	+			GOCC				+	+			2
Q8IWA4	MFN1_HUMAN	Mitofusin-1, EC 3.6.5.- (Fzo homolog) (Transmembrane GTPase MFN1)	MFN1	+			GOCC		+						2
Q16186	ADRM1_HUMAN	Proteasomal ubiquitin receptor ADRM1 (110 kDa cell membrane glycoprotein, Gp110) (Adhesion-regulating molecule 1, ARM-1) (Proteasome regulatory particle non-ATPase 13, hRpn13) (Rpn13 homolog)	ADRM1 GP110	+			GOCC	+							2
Q9H0A0	NAT10_HUMAN	RNA cytidine acetyltransferase, EC 2.3.1.- (18S rRNA cytosine acetyltransferase) (N-acetyltransferase 10) (N-acetyltransferase-like protein, hALP)	NAT10 ALP KIAA1709	+			GOCC							+	2
Q8IZL8	PELP1_HUMAN	Proline-, glutamic acid- and leucine-rich protein 1 (Modulator of non-genomic activity of estrogen receptor) (Transcription factor HMX3)	PELP1 HMX3 MNAR	+			GOCC							+	2
P46821	MAP1B_HUMAN	Microtubule-associated protein 1B, MAP-1B [Cleaved into: MAP1B heavy chain; MAP1 light chain LC1 ]	MAP1B	+			GOCC	+							2
Q9Y3Z3	SAMH1_HUMAN	Deoxynucleoside triphosphate triphosphohydrolase SAMHD1, dNTPase, EC 3.1.5.- (Dendritic cell-derived IFNG-induced protein, DCIP) (Monocyte protein 5, MOP-5) (SAM domain and HD domain-containing protein 1, hSAMHD1)	SAMHD1 MOP5	+			GOCC	+							2
Q9Y314	NOSIP_HUMAN	Nitric oxide synthase-interacting protein (E3 ubiquitin-protein ligase NOSIP, EC 2.3.2.27) (RING-type E3 ubiquitin transferase NOSIP) (eNOS-interacting protein)	NOSIP CGI-25	+			GOCC				+				2
P23142	FBLN1_HUMAN	Fibulin-1, FIBL-1	FBLN1 PP213	+			GOCC							+	2
Q93008	USP9X_HUMAN	Probable ubiquitin carboxyl-terminal hydrolase FAF-X, EC 3.4.19.12 (Deubiquitinating enzyme FAF-X) (Fat facets in mammals, hFAM) (Fat facets protein-related, X-linked) (Ubiquitin thioesterase FAF-X) (Ubiquitin-specific protease 9, X chromosome) (Ubiquitin-specific-processing protease FAF-X)	USP9X DFFRX FAM USP9	+			GOCC							+	2
Q6Y7W6	GGYF2_HUMAN	GRB10-interacting GYF protein 2 (PERQ amino acid-rich with GYF domain-containing protein 2) (Trinucleotide repeat-containing gene 15 protein)	GIGYF2 KIAA0642 PERQ2 TNRC15	+			GOCC							+	2
Q9H4G4	GAPR1_HUMAN	Golgi-associated plant pathogenesis-related protein 1, GAPR-1, Golgi-associated PR-1 protein (Glioma pathogenesis-related protein 2, GliPR 2)	GLIPR2 C9orf19 GAPR1	+			GOCC				+				2
O43681	GET3_HUMAN	ATPase GET3, EC 3.6.-.- (Arsenical pump-driving ATPase) (Arsenite-stimulated ATPase) (Guided entry of tail-anchored proteins factor 3, ATPase) (Transmembrane domain recognition complex 40 kDa ATPase subunit) (hARSA-I) (hASNA-I)	GET3 ARSA ASNA1 TRC40	+			GOCC					+			2
Q53GS7	GLE1_HUMAN	mRNA export factor GLE1, hGLE1 (GLE1 RNA export mediator) (GLE1-like protein) (Nucleoporin GLE1)	GLE1 GLE1L	+			GOCC			+					2
Q99961	SH3G1_HUMAN	Endophilin-A2 (EEN fusion partner of MLL) (Endophilin-2) (Extra eleven-nineteen leukemia fusion gene protein, EEN) (SH3 domain protein 2B) (SH3 domain-containing GRB2-like protein 1)	SH3GL1 CNSA1 SH3D2B	+			GOCC						+		2
Q7L014	DDX46_HUMAN	Probable ATP-dependent RNA helicase DDX46, EC 3.6.4.13 (DEAD box protein 46) (PRP5 homolog)	DDX46 KIAA0801	+			GOCC							+	2
Q9H1C7	CYTM1_HUMAN	Cysteine-rich and transmembrane domain-containing protein 1	CYSTM1 C5orf32 ORF1-FL49	+			GOCC	+							2
P40692	MLH1_HUMAN	DNA mismatch repair protein Mlh1 (MutL protein homolog 1)	MLH1 COCA2	+			GOCC							+	2
Q92934	BAD_HUMAN	Bcl2-associated agonist of cell death, BAD (Bcl-2-binding component 6) (Bcl-2-like protein 8, Bcl2-L-8) (Bcl-xL/Bcl-2-associated death promoter) (Bcl2 antagonist of cell death)	BAD BBC6 BCL2L8	+			GOCC		+						2
Q9BRJ2	RM45_HUMAN	39S ribosomal protein L45, mitochondrial, L45mt, MRP-L45 (Mitochondrial large ribosomal subunit protein mL45)	MRPL45	+			GOCC		+						2
O75431	MTX2_HUMAN	Metaxin-2 (Mitochondrial outer membrane import complex protein 2)	MTX2	+			GOCC		+						2
P56556	NDUA6_HUMAN	NADH dehydrogenase [ubiquinone] 1 alpha subcomplex subunit 6 (Complex I-B14, CI-B14) (LYR motif-containing protein 6) (NADH-ubiquinone oxidoreductase B14 subunit)	NDUFA6 LYRM6 NADHB14	+			GOCC		+						2
Q8N3U4	STAG2_HUMAN	Cohesin subunit SA-2 (SCC3 homolog 2) (Stromal antigen 2)	STAG2 SA2	+			GOCC							+	2
Q9HD33	RM47_HUMAN	39S ribosomal protein L47, mitochondrial, L47mt, MRP-L47 (Mitochondrial large ribosomal subunit protein uL29m) (Nasopharyngeal carcinoma metastasis-related protein 1)	MRPL47 NCM1 CGI-204	+			GOCC		+						2
P29353	SHC1_HUMAN	SHC-transforming protein 1 (SHC-transforming protein 3) (SHC-transforming protein A) (Src homology 2 domain-containing-transforming protein C1, SH2 domain protein C1)	SHC1 SHC SHCA	+			GOCC	+							2
Q8N201	INT1_HUMAN	Integrator complex subunit 1, Int1	INTS1 KIAA1440 UNQ1821/PRO3434	+			GOCC			+					2
Q9UI12	VATH_HUMAN	V-type proton ATPase subunit H, V-ATPase subunit H (Nef-binding protein 1, NBP1) (Protein VMA13 homolog) (V-ATPase 50/57 kDa subunits) (Vacuolar proton pump subunit H) (Vacuolar proton pump subunit SFD)	ATP6V1H CGI-11	+			GOCC	+			+		+		2
Q99584	S10AD_HUMAN	Protein S100-A13 (S100 calcium-binding protein A13)	S100A13	+			GOCC	+							2
O75330	HMMR_HUMAN	Hyaluronan mediated motility receptor (Intracellular hyaluronic acid-binding protein) (Receptor for hyaluronan-mediated motility) (CD antigen CD168)	HMMR IHABP RHAMM	+			GOCC	+							2
Q5TEA6	SE1L2_HUMAN	Protein sel-1 homolog 2 (Suppressor of lin-12-like protein 2, Sel-1L2)	SEL1L2 C20orf50	+			GOCC					+			2
Q13823	NOG2_HUMAN	Nucleolar GTP-binding protein 2 (Autoantigen NGP-1)	GNL2 NGP1	+			GOCC							+	2
P51610	HCFC1_HUMAN	Host cell factor 1, HCF, HCF-1 (C1 factor) (CFF) (VCAF) (VP16 accessory protein) [Cleaved into: HCF N-terminal chain 1; HCF N-terminal chain 2; HCF N-terminal chain 3; HCF N-terminal chain 4; HCF N-terminal chain 5; HCF N-terminal chain 6; HCF C-terminal chain 1; HCF C-terminal chain 2; HCF C-terminal chain 3; HCF C-terminal chain 4; HCF C-terminal chain 5; HCF C-terminal chain 6 ]	HCFC1 HCF1 HFC1	+			GOCC							+	2
Q8N335	GPD1L_HUMAN	Glycerol-3-phosphate dehydrogenase 1-like protein, GPD1-L, EC 1.1.1.8	GPD1L KIAA0089	+			GOCC	+							2
Q9Y4E1	WAC2C_HUMAN	WASH complex subunit 2C (Vaccinia virus penetration factor, VPEF)	WASHC2C FAM21C KIAA0592 VPEF	+			GOCC	+					+		2
Q92530	PSMF1_HUMAN	Proteasome inhibitor PI31 subunit, hPI31	PSMF1	+			GOCC							+	2
Q9NVA1	UQCC1_HUMAN	Ubiquinol-cytochrome-c reductase complex assembly factor 1 (Basic FGF-repressed Zic-binding protein, bFGF-repressed Zic-binding protein, bFZb) (Ubiquinol-cytochrome c reductase complex chaperone CBP3 homolog)	UQCC1 BZFB C20orf44 UQCC	+			GOCC		+						2
Q5SRE5	NU188_HUMAN	Nucleoporin NUP188, hNup188	NUP188 KIAA0169	+			GOCC			+					2
Q8NI35	INADL_HUMAN	InaD-like protein, Inadl protein, hINADL (Channel-interacting PDZ domain-containing protein) (Pals1-associated tight junction protein) (Protein associated to tight junctions)	PATJ CIPP INADL	+			GOCC	+							2
Q9H2K2	TNKS2_HUMAN	Poly [ADP-ribose] polymerase tankyrase-2, EC 2.4.2.30 (ADP-ribosyltransferase diphtheria toxin-like 6, ARTD6) (Poly [ADP-ribose] polymerase 5B) (Protein poly-ADP-ribosyltransferase tankyrase-2, EC 2.4.2.-) (TNKS-2) (TRF1-interacting ankyrin-related ADP-ribose polymerase 2) (Tankyrase II) (Tankyrase-2, TANK2) (Tankyrase-like protein) (Tankyrase-related protein)	TNKS2 PARP5B TANK2 TNKL	+			GOCC			+	+				2
Q8TAT6	NPL4_HUMAN	Nuclear protein localization protein 4 homolog, Protein NPL4	NPLOC4 KIAA1499 NPL4	+			GOCC			+		+			1
Q96T51	RUFY1_HUMAN	RUN and FYVE domain-containing protein 1 (FYVE-finger protein EIP1) (La-binding protein 1) (Rab4-interacting protein) (Zinc finger FYVE domain-containing protein 12)	RUFY1 RABIP4 ZFYVE12	+			GOCC						+		1
Q9Y4W2	LAS1L_HUMAN	Ribosomal biogenesis protein LAS1L (Protein LAS1 homolog)	LAS1L MSTP060	+			GOCC							+	1
Q9UDX5	MTFP1_HUMAN	Mitochondrial fission process protein 1 (Mitochondrial 18 kDa protein, MTP18)	MTFP1 MTP18 HSPC242 My022	+			GOCC		+						1
Q9NQ88	TIGAR_HUMAN	Fructose-2,6-bisphosphatase TIGAR, EC 3.1.3.46 (TP53-induced glycolysis and apoptosis regulator) (TP53-induced glycolysis regulatory phosphatase)	TIGAR C12orf5	+			GOCC		+						1
P10646	TFPI1_HUMAN	Tissue factor pathway inhibitor, TFPI (Extrinsic pathway inhibitor, EPI) (Lipoprotein-associated coagulation inhibitor, LACI)	TFPI LACI TFPI1	+			GOCC	+							1
P49821	NDUV1_HUMAN	NADH dehydrogenase [ubiquinone] flavoprotein 1, mitochondrial, EC 7.1.1.2 (Complex I-51kD, CI-51kD) (NADH dehydrogenase flavoprotein 1) (NADH-ubiquinone oxidoreductase 51 kDa subunit)	NDUFV1 UQOR1	+			GOCC		+						1
Q01844	EWS_HUMAN	RNA-binding protein EWS (EWS oncogene) (Ewing sarcoma breakpoint region 1 protein)	EWSR1 EWS	+			GOCC	+							1
Q92597	NDRG1_HUMAN	Protein NDRG1 (Differentiation-related gene 1 protein, DRG-1) (N-myc downstream-regulated gene 1 protein) (Nickel-specific induction protein Cap43) (Reducing agents and tunicamycin-responsive protein, RTP) (Rit42)	NDRG1 CAP43 DRG1 RTP	+			GOCC	+					+		1
Q92879	CELF1_HUMAN	CUGBP Elav-like family member 1, CELF-1 (50 kDa nuclear polyadenylated RNA-binding protein) (Bruno-like protein 2) (CUG triplet repeat RNA-binding protein 1, CUG-BP1) (CUG-BP- and ETR-3-like factor 1) (Deadenylation factor CUG-BP) (Embryo deadenylation element-binding protein homolog, EDEN-BP homolog) (RNA-binding protein BRUNOL-2)	CELF1 BRUNOL2 CUGBP CUGBP1 NAB50	+			GOCC							+	1
Q92572	AP3S1_HUMAN	AP-3 complex subunit sigma-1 (AP-3 complex subunit sigma-3A) (Adaptor-related protein complex 3 subunit sigma-1) (Clathrin-associated/assembly/adaptor protein, small 3) (Sigma-3A-adaptin, Sigma3A-adaptin) (Sigma-adaptin 3a)	AP3S1 CLAPS3	+			GOCC						+		1
P46939	UTRN_HUMAN	Utrophin (Dystrophin-related protein 1, DRP-1)	UTRN DMDL DRP1	+			GOCC	+							1
P35555	FBN1_HUMAN	Fibrillin-1 [Cleaved into: Asprosin ]	FBN1 FBN	+			GOCC							+	1
P54619	AAKG1_HUMAN	5'-AMP-activated protein kinase subunit gamma-1, AMPK gamma1, AMPK subunit gamma-1, AMPKg	PRKAG1	+			GOCC							+	1
Q5SY16	NOL9_HUMAN	Polynucleotide 5'-hydroxyl-kinase NOL9, EC 2.7.1.- (Nucleolar protein 9)	NOL9	+			GOCC							+	1
Q9H2D1	MFTC_HUMAN	Mitochondrial folate transporter/carrier (Solute carrier family 25 member 32)	SLC25A32 MFT MFTC	+			GOCC		+						1
Q96EL3	RM53_HUMAN	39S ribosomal protein L53, mitochondrial, L53mt, MRP-L53 (Mitochondrial large ribosomal subunit protein mL53)	MRPL53	+			GOCC		+						1
Q9UL46	PSME2_HUMAN	Proteasome activator complex subunit 2 (11S regulator complex subunit beta, REG-beta) (Activator of multicatalytic protease subunit 2) (Proteasome activator 28 subunit beta, PA28b, PA28beta)	PSME2	+			GOCC							+	1
Q96F07	CYFP2_HUMAN	Cytoplasmic FMR1-interacting protein 2 (p53-inducible protein 121)	CYFIP2 KIAA1168 PIR121	+			GOCC							+	1
Q9UK41	VPS28_HUMAN	Vacuolar protein sorting-associated protein 28 homolog, H-Vps28 (ESCRT-I complex subunit VPS28)	VPS28	+			GOCC	+					+		1
Q13217	DNJC3_HUMAN	DnaJ homolog subfamily C member 3 (Endoplasmic reticulum DNA J domain-containing protein 6, ER-resident protein ERdj6, ERdj6) (Interferon-induced, double-stranded RNA-activated protein kinase inhibitor) (Protein kinase inhibitor of 58 kDa, Protein kinase inhibitor p58)	DNAJC3 P58IPK PRKRI	+			GOCC							+	1
Q9NVT9	ARMC1_HUMAN	Armadillo repeat-containing protein 1	ARMC1 ARCP	+			GOCC		+						1
Q96AG3	S2546_HUMAN	Mitochondrial outer membrane protein SLC25A46 (Solute carrier family 25 member 46)	SLC25A46 TB1	+			GOCC		+						1
O75462	CRLF1_HUMAN	Cytokine receptor-like factor 1 (Cytokine-like factor 1, CLF-1) (ZcytoR5)	CRLF1 UNQ288/PRO327	+			GOCC	+							1
P25445	TNR6_HUMAN	Tumor necrosis factor receptor superfamily member 6 (Apo-1 antigen) (Apoptosis-mediating surface antigen FAS) (FASLG receptor) (CD antigen CD95)	FAS APT1 FAS1 TNFRSF6	+			GOCC	+							1
Q92817	EVPL_HUMAN	Envoplakin (210 kDa cornified envelope precursor protein) (210 kDa paraneoplastic pemphigus antigen) (p210)	EVPL	+			GOCC							+	1
Q9UJU6	DBNL_HUMAN	Drebrin-like protein (Cervical SH3P7) (Cervical mucin-associated protein) (Drebrin-F) (HPK1-interacting protein of 55 kDa, HIP-55) (SH3 domain-containing protein 7)	DBNL CMAP SH3P7 PP5423	+			GOCC	+			+		+		1
Q9BUL8	PDC10_HUMAN	Programmed cell death protein 10 (Cerebral cavernous malformations 3 protein) (TF-1 cell apoptosis-related protein 15)	PDCD10 CCM3 TFAR15	+			GOCC	+			+				1
O43491	E41L2_HUMAN	Band 4.1-like protein 2 (Erythrocyte membrane protein band 4.1-like 2) (Generally expressed protein 4.1, 4.1G)	EPB41L2	+			GOCC	+							1
O60306	AQR_HUMAN	RNA helicase aquarius, EC 3.6.4.13 (Intron-binding protein of 160 kDa, IBP160)	AQR KIAA0560	+			GOCC							+	1
Q5T1M5	FKB15_HUMAN	FK506-binding protein 15, FKBP-15 (133 kDa FK506-binding protein, 133 kDa FKBP, FKBP-133) (WASP- and FKBP-like protein, WAFL)	FKBP15 KIAA0674	+			GOCC							+	1
Q9BSD7	NTPCR_HUMAN	Cancer-related nucleoside-triphosphatase, NTPase, EC 3.6.1.15 (Nucleoside triphosphate phosphohydrolase)	NTPCR C1orf57	+			GOCC							+	1
Q00587	BORG5_HUMAN	Cdc42 effector protein 1 (Binder of Rho GTPases 5) (Serum protein MSE55)	CDC42EP1 BORG5 CEP1 MSE55	+			GOCC	+							1
Q9NUI1	DECR2_HUMAN	Peroxisomal 2,4-dienoyl-CoA reductase [(3E)-enoyl-CoA-producing], pDCR, EC 1.3.1.124 (2,4-dienoyl-CoA reductase 2) (Short chain dehydrogenase/reductase family 17C member 1)	DECR2 PDCR SDR17C1	+			GOCC						+		1
P49841	GSK3B_HUMAN	Glycogen synthase kinase-3 beta, GSK-3 beta, EC 2.7.11.26 (Serine/threonine-protein kinase GSK3B, EC 2.7.11.1)	GSK3B	+			GOCC	+							1
O43237	DC1L2_HUMAN	Cytoplasmic dynein 1 light intermediate chain 2 (Dynein light intermediate chain 2, cytosolic, LIC-2) (LIC53/55)	DYNC1LI2 DNCLI2 LIC2	+			GOCC							+	1
P01008	ANT3_HUMAN	Antithrombin-III, ATIII (Serpin C1)	SERPINC1 AT3 PRO0309	+			GOCC	+							1
P17612	KAPCA_HUMAN	cAMP-dependent protein kinase catalytic subunit alpha, PKA C-alpha, EC 2.7.11.11	PRKACA PKACA	+			GOCC	+							1
Q15003	CND2_HUMAN	Condensin complex subunit 2 (Barren homolog protein 1) (Chromosome-associated protein H, hCAP-H) (Non-SMC condensin I complex subunit H) (XCAP-H homolog)	NCAPH BRRN BRRN1 CAPH KIAA0074	+			GOCC							+	1
P25686	DNJB2_HUMAN	DnaJ homolog subfamily B member 2 (Heat shock 40 kDa protein 3) (Heat shock protein J1, HSJ-1)	DNAJB2 HSJ1 HSPF3	+			GOCC			+		+			1
Q9UKS6	PACN3_HUMAN	Protein kinase C and casein kinase substrate in neurons protein 3 (SH3 domain-containing protein 6511)	PACSIN3	+			GOCC	+							1
P33992	MCM5_HUMAN	DNA replication licensing factor MCM5, EC 3.6.4.12 (CDC46 homolog) (P1-CDC46)	MCM5 CDC46	+			GOCC							+	1
Q96H20	SNF8_HUMAN	Vacuolar-sorting protein SNF8 (ELL-associated protein of 30 kDa) (ESCRT-II complex subunit VPS22, hVps22)	SNF8 EAP30	+			GOCC	+					+		1
Q15126	PMVK_HUMAN	Phosphomevalonate kinase, PMKase, hPMK, EC 2.7.4.2	PMVK PMKI	+			GOCC							+	1
Q9Y2R9	RT07_HUMAN	28S ribosomal protein S7, mitochondrial, MRP-S7, S7mt (Mitochondrial small ribosomal subunit protein uS7m) (bMRP-27a, bMRP27a)	MRPS7	+			GOCC		+						1
Q8TEX9	IPO4_HUMAN	Importin-4, Imp4 (Importin-4b, Imp4b) (Ran-binding protein 4, RanBP4)	IPO4 IMP4B RANBP4	+			GOCC							+	1
Q8N2G8	GHDC_HUMAN	GH3 domain-containing protein	GHDC D11LGP1E LGP1	+			GOCC			+					1
Q96KG9	SCYL1_HUMAN	N-terminal kinase-like protein (Coated vesicle-associated kinase of 90 kDa) (SCY1-like protein 1) (Telomerase regulation-associated protein) (Telomerase transcriptional element-interacting factor) (Teratoma-associated tyrosine kinase)	SCYL1 CVAK90 GKLP NTKL TAPK TEIF TRAP HT019	+			GOCC				+	+			1
Q8WUK0	PTPM1_HUMAN	Phosphatidylglycerophosphatase and protein-tyrosine phosphatase 1, EC 3.1.3.27 (PTEN-like phosphatase) (Phosphoinositide lipid phosphatase) (Protein-tyrosine phosphatase mitochondrial 1, EC 3.1.3.16, EC 3.1.3.48)	PTPMT1 MOSP PLIP PNAS-129	+			GOCC		+						1
Q8N8R3	MCATL_HUMAN	Mitochondrial basic amino acids transporter (Carnitine/acylcarnitine translocase-like, CACT-like) (Mitochondrial carnitine/acylcarnitine carrier protein CACL) (Mitochondrial ornithine transporter 3) (Solute carrier family 25 member 29)	SLC25A29 C14orf69 ORNT3	+			GOCC		+						1
Q9NTK5	OLA1_HUMAN	Obg-like ATPase 1 (DNA damage-regulated overexpressed in cancer 45, DOC45) (GTP-binding protein 9)	OLA1 GTPBP9 PRO2455 PTD004	+			GOCC							+	1
Q96BW9	TAM41_HUMAN	Phosphatidate cytidylyltransferase, mitochondrial, EC 2.7.7.41 (CDP-diacylglycerol synthase, CDP-DAG synthase) (Mitochondrial translocator assembly and maintenance protein 41 homolog, TAM41)	TAMM41 C3orf31	+			GOCC		+						1
Q92791	SC65_HUMAN	Endoplasmic reticulum protein SC65 (Leprecan-like protein 4) (Nucleolar autoantigen No55) (Prolyl 3-hydroxylase family member 4) (Synaptonemal complex protein SC65)	P3H4 LEPREL4 NOL55 SC65	+			GOCC							+	1
Q6P996	PDXD1_HUMAN	Pyridoxal-dependent decarboxylase domain-containing protein 1, EC 4.1.1.-	PDXDC1 KIAA0251	+			GOCC							+	1
P39059	COFA1_HUMAN	Collagen alpha-1(XV) chain [Cleaved into: Restin (Endostatin-XV) (Related to endostatin) (Restin-I); Restin-2 (Restin-II); Restin-3 (Restin-III); Restin-4 (Restin-IV) ]	COL15A1	+			GOCC							+	1
Q9Y399	RT02_HUMAN	28S ribosomal protein S2, mitochondrial, MRP-S2, S2mt (Mitochondrial small ribosomal subunit protein uS2m)	MRPS2 CGI-91	+			GOCC		+						1
O94776	MTA2_HUMAN	Metastasis-associated protein MTA2 (Metastasis-associated 1-like 1, MTA1-L1 protein) (p53 target protein in deacetylase complex)	MTA2 MTA1L1 PID	+			GOCC							+	1
O43795	MYO1B_HUMAN	Unconventional myosin-Ib (MYH-1c) (Myosin I alpha, MMI-alpha, MMIa)	MYO1B	+			GOCC	+					+		1
Q9Y450	HBS1L_HUMAN	HBS1-like protein (ERFS)	HBS1L HBS1 KIAA1038	+			GOCC							+	1
Q8IVP5	FUND1_HUMAN	FUN14 domain-containing protein 1	FUNDC1	+			GOCC		+						1
Q96IZ0	PAWR_HUMAN	PRKC apoptosis WT1 regulator protein (Prostate apoptosis response 4 protein, Par-4)	PAWR PAR4	+			GOCC	+							1
Q9H4A3	WNK1_HUMAN	Serine/threonine-protein kinase WNK1, EC 2.7.11.1 (Erythrocyte 65 kDa protein, p65) (Kinase deficient protein) (Protein kinase lysine-deficient 1) (Protein kinase with no lysine 1, hWNK1)	WNK1 HSN2 KDP KIAA0344 PRKWNK1	+			GOCC							+	1
Q96CX2	KCD12_HUMAN	BTB/POZ domain-containing protein KCTD12 (Pfetin) (Predominantly fetal expressed T1 domain)	KCTD12 C13orf2 KIAA1778 PFET1	+			GOCC							+	1
P62341	SELT_HUMAN	Thioredoxin reductase-like selenoprotein T, SelT, EC 1.8.1.9	SELENOT SELT UNQ150/PRO176	+			GOCC					+			1
Q9UK76	JUPI1_HUMAN	Jupiter microtubule associated homolog 1 (Androgen-regulated protein 2) (Hematological and neurological expressed 1 protein) [Cleaved into: Jupiter microtubule associated homolog 1, N-terminally processed ]	JPT1 ARM2 HN1	+			GOCC			+					1
Q9P2J5	SYLC_HUMAN	Leucine--tRNA ligase, cytoplasmic, EC 6.1.1.4 (Leucyl-tRNA synthetase, LeuRS)	LARS1 KIAA1352 LARS	+			GOCC							+	1
P82675	RT05_HUMAN	28S ribosomal protein S5, mitochondrial, MRP-S5, S5mt (Mitochondrial small ribosomal subunit protein uS5m)	MRPS5	+			GOCC		+						1
Q9BTZ2	DHRS4_HUMAN	Dehydrogenase/reductase SDR family member 4, EC 1.1.1.184 (NADPH-dependent carbonyl reductase, CR) (NADPH-dependent retinol dehydrogenase/reductase, NRDR, humNRDR) (Peroxisomal short-chain alcohol dehydrogenase, PSCD) (SCAD-SRL) (Short chain dehydrogenase/reductase family 25C member 2, Protein SDR25C2) (Short-chain dehydrogenase/reductase family member 4)	DHRS4 SDR25C2 UNQ851/PRO1800	+			GOCC					+	+		1
P23786	CPT2_HUMAN	Carnitine O-palmitoyltransferase 2, mitochondrial, EC 2.3.1.21 (Carnitine palmitoyltransferase II, CPT II)	CPT2 CPT1	+			GOCC		+						1
P29279	CCN2_HUMAN	CCN family member 2 (Cellular communication network factor 2) (Connective tissue growth factor) (Hypertrophic chondrocyte-specific protein 24) (Insulin-like growth factor-binding protein 8, IBP-8, IGF-binding protein 8, IGFBP-8)	CCN2 CTGF HCS24 IGFBP8	+			GOCC	+							1
Q9NVI1	FANCI_HUMAN	Fanconi anemia group I protein, Protein FACI	FANCI KIAA1794	+			GOCC							+	1
O60784	TOM1_HUMAN	Target of Myb protein 1	TOM1	+			GOCC	+							1
O95071	UBR5_HUMAN	E3 ubiquitin-protein ligase UBR5, EC 2.3.2.26 (E3 ubiquitin-protein ligase, HECT domain-containing 1) (HECT-type E3 ubiquitin transferase UBR5) (Hyperplastic discs protein homolog, hHYD) (Progestin-induced protein)	UBR5 EDD EDD1 HYD KIAA0896	+			GOCC							+	1
Q9BYC9	RM20_HUMAN	39S ribosomal protein L20, mitochondrial, L20mt, MRP-L20 (Mitochondrial large ribosomal subunit protein bL20m)	MRPL20	+			GOCC		+						1
P46063	RECQ1_HUMAN	ATP-dependent DNA helicase Q1, EC 3.6.4.12 (DNA helicase, RecQ-like type 1, RecQ1) (DNA-dependent ATPase Q1) (RecQ protein-like 1)	RECQL RECQ1 RECQL1	+			GOCC							+	1
Q8N684	CPSF7_HUMAN	Cleavage and polyadenylation specificity factor subunit 7 (Cleavage and polyadenylation specificity factor 59 kDa subunit, CPSF 59 kDa subunit) (Cleavage factor Im complex 59 kDa subunit, CFIm59) (Pre-mRNA cleavage factor Im 59 kDa subunit)	CPSF7	+			GOCC							+	1
Q8WXH0	SYNE2_HUMAN	Nesprin-2 (KASH domain-containing protein 2, KASH2) (Nuclear envelope spectrin repeat protein 2) (Nucleus and actin connecting element protein, Protein NUANCE) (Synaptic nuclear envelope protein 2, Syne-2)	SYNE2 KIAA1011 NUA	+			GOCC			+					1
Q14168	MPP2_HUMAN	MAGUK p55 subfamily member 2 (Discs large homolog 2) (Protein MPP2)	MPP2 DLG2	+			GOCC	+							1
Q9H089	LSG1_HUMAN	Large subunit GTPase 1 homolog, hLsg1, EC 3.6.1.-	LSG1	+			GOCC							+	1
Q9NPP4	NLRC4_HUMAN	NLR family CARD domain-containing protein 4 (CARD, LRR, and NACHT-containing protein, CED-4-like protein Clan) (Caspase recruitment domain-containing protein 12) (Ice protease-activating factor, Ipaf)	NLRC4 CARD12 CLAN CLAN1 IPAF UNQ6189/PRO20215	+			GOCC							+	1
P35240	MERL_HUMAN	Merlin (Moesin-ezrin-radixin-like protein) (Neurofibromin-2) (Schwannomerlin) (Schwannomin)	NF2 SCH	+			GOCC	+							1
Q2M3T9	HYAL4_HUMAN	Hyaluronidase-4, Hyal-4, EC 3.2.1.35 (Chondroitin sulfate endo-beta-N-acetylgalactosaminidase) (Chondroitin sulfate hydrolase, CSHY) (Hyaluronoglucosaminidase-4)	HYAL4	+			GOCC	+							1
Q9BSF4	TIM29_HUMAN	Mitochondrial import inner membrane translocase subunit Tim29, TIM29	TIMM29 c19orf52	+			GOCC		+						1
Q9NSD9	SYFB_HUMAN	Phenylalanine--tRNA ligase beta subunit, EC 6.1.1.20 (Phenylalanyl-tRNA synthetase beta subunit, PheRS)	FARSB FARSLB FRSB HSPC173	+			GOCC							+	1
Q32MZ4	LRRF1_HUMAN	Leucine-rich repeat flightless-interacting protein 1, LRR FLII-interacting protein 1 (GC-binding factor 2) (TAR RNA-interacting protein)	LRRFIP1 GCF2 TRIP	+			GOCC	+							1
Q9NS28	RGS18_HUMAN	Regulator of G-protein signaling 18, RGS18	RGS18 RGS13	+			GOCC	+							1
O95817	BAG3_HUMAN	BAG family molecular chaperone regulator 3, BAG-3 (Bcl-2-associated athanogene 3) (Bcl-2-binding protein Bis) (Docking protein CAIR-1)	BAG3 BIS	+			GOCC							+	1
Q8NB66	UN13C_HUMAN	Protein unc-13 homolog C (Munc13-3)	UNC13C	+			GOCC	+					+		1
O15083	ERC2_HUMAN	ERC protein 2	ERC2 KIAA0378	+			GOCC							+	1
Q96I99	SUCB2_HUMAN	Succinate--CoA ligase [GDP-forming] subunit beta, mitochondrial, EC 6.2.1.4 (GTP-specific succinyl-CoA synthetase subunit beta, G-SCS, GTPSCS) (Succinyl-CoA synthetase beta-G chain, SCS-betaG)	SUCLG2	+			GOCC	+							1
Q9H553	ALG2_HUMAN	Alpha-1,3/1,6-mannosyltransferase ALG2, EC 2.4.1.132, EC 2.4.1.257 (Asparagine-linked glycosylation protein 2 homolog) (GDP-Man:Man(1)GlcNAc(2)-PP-Dol alpha-1,3-mannosyltransferase) (GDP-Man:Man(1)GlcNAc(2)-PP-dolichol mannosyltransferase) (GDP-Man:Man(2)GlcNAc(2)-PP-Dol alpha-1,6-mannosyltransferase)	ALG2 UNQ666/PRO1298	+			GOCC					+			1
Q16363	LAMA4_HUMAN	Laminin subunit alpha-4 (Laminin-14 subunit alpha) (Laminin-8 subunit alpha) (Laminin-9 subunit alpha)	LAMA4	+			GOCC							+	1
Q9BXF9	TEKT3_HUMAN	Tektin-3	TEKT3	+			GOCC							+	1
P36955	PEDF_HUMAN	Pigment epithelium-derived factor, PEDF (Cell proliferation-inducing gene 35 protein) (EPC-1) (Serpin F1)	SERPINF1 PEDF PIG35	+			GOCC							+	1
Q14019	COTL1_HUMAN	Coactosin-like protein	COTL1 CLP	+			GOCC	+							1
Q15046	SYK_HUMAN	Lysine--tRNA ligase, EC 2.7.7.-, EC 6.1.1.6 (Lysyl-tRNA synthetase, LysRS)	KARS1 KARS KIAA0070	+			GOCC	+							1
Q6PJG6	BRAT1_HUMAN	BRCA1-associated ATM activator 1 (BRCA1-associated protein required for ATM activation protein 1)	BRAT1 BAAT1 C7orf27	+			GOCC							+	1
Q13614	MTMR2_HUMAN	Myotubularin-related protein 2 (Phosphatidylinositol-3,5-bisphosphate 3-phosphatase, EC 3.1.3.95) (Phosphatidylinositol-3-phosphate phosphatase, EC 3.1.3.64)	MTMR2 KIAA1073	+			GOCC						+		1
P46020	KPB1_HUMAN	Phosphorylase b kinase regulatory subunit alpha, skeletal muscle isoform, Phosphorylase kinase alpha M subunit	PHKA1 PHKA	+			GOCC	+							1
O43264	ZW10_HUMAN	Centromere/kinetochore protein zw10 homolog	ZW10	+			GOCC					+			1
Q9Y4K0	LOXL2_HUMAN	Lysyl oxidase homolog 2, EC 1.4.3.13 (Lysyl oxidase-like protein 2) (Lysyl oxidase-related protein 2) (Lysyl oxidase-related protein WS9-14)	LOXL2	+			GOCC							+	1
Q15058	KIF14_HUMAN	Kinesin-like protein KIF14	KIF14 KIAA0042	+			GOCC							+	1
P50851	LRBA_HUMAN	Lipopolysaccharide-responsive and beige-like anchor protein (Beige-like protein) (CDC4-like protein)	LRBA BGL CDC4L LBA	+			GOCC	+				+	+		1
Q9NRC6	SPTN5_HUMAN	Spectrin beta chain, non-erythrocytic 5 (Beta-V spectrin)	SPTBN5 BSPECV HUBSPECV HUSPECV	+			GOCC							+	1
P42345	MTOR_HUMAN	Serine/threonine-protein kinase mTOR, EC 2.7.11.1 (FK506-binding protein 12-rapamycin complex-associated protein 1) (FKBP12-rapamycin complex-associated protein) (Mammalian target of rapamycin, mTOR) (Mechanistic target of rapamycin) (Rapamycin and FKBP12 target 1) (Rapamycin target protein 1)	MTOR FRAP FRAP1 FRAP2 RAFT1 RAPT1	+			GOCC		+	+	+	+	+		1
Q99536	VAT1_HUMAN	Synaptic vesicle membrane protein VAT-1 homolog, EC 1.-.-.-	VAT1	+			GOCC		+						1
P38398	BRCA1_HUMAN	Breast cancer type 1 susceptibility protein, EC 2.3.2.27 (RING finger protein 53) (RING-type E3 ubiquitin transferase BRCA1)	BRCA1 RNF53	+			GOCC	+							1
P13667	PDIA4_HUMAN	Protein disulfide-isomerase A4, EC 5.3.4.1 (Endoplasmic reticulum resident protein 70, ER protein 70, ERp70) (Endoplasmic reticulum resident protein 72, ER protein 72, ERp-72, ERp72)	PDIA4 ERP70 ERP72	+			TMHMM2.0	+							18
Q92520	FAM3C_HUMAN	Protein FAM3C (Interleukin-like EMT inducer)	FAM3C ILEI GS3786	+			TMHMM2.0							+	15
Q9NYU2	UGGG1_HUMAN	UDP-glucose:glycoprotein glucosyltransferase 1, UGT1, hUGT1, EC 2.4.1.- (UDP--Glc:glycoprotein glucosyltransferase) (UDP-glucose ceramide glucosyltransferase-like 1)	UGGT1 GT UGCGL1 UGGT UGT1 UGTR	+			TMHMM2.0				+	+			13
Q8WUY1	THEM6_HUMAN	Protein THEM6 (Mesenchymal stem cell protein DSCD75) (Thioesterase superfamily member 6)	THEM6 C8orf55 PSEC0098	+			TMHMM2.0							+	4
O75718	CRTAP_HUMAN	Cartilage-associated protein	CRTAP CASP	+			TMHMM2.0							+	4
P08572	CO4A2_HUMAN	Collagen alpha-2(IV) chain [Cleaved into: Canstatin ]	COL4A2	+			TMHMM2.0							+	3
Q86UV5	UBP48_HUMAN	Ubiquitin carboxyl-terminal hydrolase 48, EC 3.4.19.12 (Deubiquitinating enzyme 48) (Ubiquitin thioesterase 48) (Ubiquitin-specific peptidase 48) (Ubiquitin-specific protease 48) (Ubiquitin-specific-processing protease 48)	USP48 USP31	+			TMHMM2.0							+	2
P68371	TBB4B_HUMAN	Tubulin beta-4B chain (Tubulin beta-2 chain) (Tubulin beta-2C chain)	TUBB4B TUBB2C		+										256
P04350	TBB4A_HUMAN	Tubulin beta-4A chain (Tubulin 5 beta) (Tubulin beta-4 chain)	TUBB4A TUBB4 TUBB5		+										235
P68366	TBA4A_HUMAN	Tubulin alpha-4A chain (Alpha-tubulin 1) (Testis-specific alpha-tubulin) (Tubulin H2-alpha) (Tubulin alpha-1 chain)	TUBA4A TUBA1		+										191
P14618	KPYM_HUMAN	Pyruvate kinase PKM, EC 2.7.1.40 (Cytosolic thyroid hormone-binding protein, CTHBP) (Opa-interacting protein 3, OIP-3) (Pyruvate kinase 2/3) (Pyruvate kinase muscle isozyme) (Threonine-protein kinase PKM2, EC 2.7.11.1) (Thyroid hormone-binding protein 1, THBP1) (Tumor M2-PK) (Tyrosine-protein kinase PKM2, EC 2.7.10.2) (p58)	PKM OIP3 PK2 PK3 PKM2		+										143
Q13509	TBB3_HUMAN	Tubulin beta-3 chain (Tubulin beta-4 chain) (Tubulin beta-III)	TUBB3 TUBB4		+										130
P68133	ACTS_HUMAN	Actin, alpha skeletal muscle (Alpha-actin-1) [Cleaved into: Actin, alpha skeletal muscle, intermediate form ]	ACTA1 ACTA		+										127
Q9BUF5	TBB6_HUMAN	Tubulin beta-6 chain (Tubulin beta class V)	TUBB6		+										108
P39023	RL3_HUMAN	60S ribosomal protein L3 (HIV-1 TAR RNA-binding protein B, TARBP-B) (Large ribosomal subunit protein uL3)	RPL3 OK/SW-cl.32		+										79
P78371	TCPB_HUMAN	T-complex protein 1 subunit beta, TCP-1-beta (CCT-beta)	CCT2 99D8.1 CCTB		+										73
P49368	TCPG_HUMAN	T-complex protein 1 subunit gamma, TCP-1-gamma (CCT-gamma) (hTRiC5)	CCT3 CCTG TRIC5		+										71
P35580	MYH10_HUMAN	Myosin-10 (Cellular myosin heavy chain, type B) (Myosin heavy chain 10) (Myosin heavy chain, non-muscle IIb) (Non-muscle myosin heavy chain B, NMMHC-B) (Non-muscle myosin heavy chain IIb, NMMHC II-b, NMMHC-IIB)	MYH10		+										67
O43175	SERA_HUMAN	D-3-phosphoglycerate dehydrogenase, 3-PGDH, EC 1.1.1.95 (2-oxoglutarate reductase, EC 1.1.1.399) (Malate dehydrogenase, EC 1.1.1.37)	PHGDH PGDH3		+										66
P50990	TCPQ_HUMAN	T-complex protein 1 subunit theta, TCP-1-theta (CCT-theta) (Chaperonin containing T-complex polypeptide 1 subunit 8) (Renal carcinoma antigen NY-REN-15)	CCT8 C21orf112 CCTQ KIAA0002		+										64
Q06830	PRDX1_HUMAN	Peroxiredoxin-1, EC 1.11.1.24 (Natural killer cell-enhancing factor A, NKEF-A) (Proliferation-associated gene protein, PAG) (Thioredoxin peroxidase 2) (Thioredoxin-dependent peroxide reductase 2) (Thioredoxin-dependent peroxiredoxin 1)	PRDX1 PAGA PAGB TDPX2		+										63
P17987	TCPA_HUMAN	T-complex protein 1 subunit alpha, TCP-1-alpha (CCT-alpha)	TCP1 CCT1 CCTA		+										62
P50991	TCPD_HUMAN	T-complex protein 1 subunit delta, TCP-1-delta (CCT-delta) (Stimulator of TAR RNA-binding)	CCT4 CCTD SRB		+										54
Q96CS3	FAF2_HUMAN	FAS-associated factor 2 (Protein ETEA) (UBX domain-containing protein 3B) (UBX domain-containing protein 8)	FAF2 ETEA KIAA0887 UBXD8 UBXN3B		+										51
P04792	HSPB1_HUMAN	Heat shock protein beta-1, HspB1 (28 kDa heat shock protein) (Estrogen-regulated 24 kDa protein) (Heat shock 27 kDa protein, HSP 27) (Stress-responsive protein 27, SRP27)	HSPB1 HSP27 HSP28		+										49
P48643	TCPE_HUMAN	T-complex protein 1 subunit epsilon, TCP-1-epsilon (CCT-epsilon)	CCT5 CCTE KIAA0098		+										47
P37802	TAGL2_HUMAN	Transgelin-2 (Epididymis tissue protein Li 7e) (SM22-alpha homolog)	TAGLN2 KIAA0120 CDABP0035		+										46
Q99832	TCPH_HUMAN	T-complex protein 1 subunit eta, TCP-1-eta (CCT-eta) (HIV-1 Nef-interacting protein) [Cleaved into: T-complex protein 1 subunit eta, N-terminally processed ]	CCT7 CCTH NIP7-1		+										44
Q92973	TNPO1_HUMAN	Transportin-1 (Importin beta-2) (Karyopherin beta-2) (M9 region interaction protein, MIP)	TNPO1 KPNB2 MIP1 TRN		+										44
P63104	1433Z_HUMAN	14-3-3 protein zeta/delta (Protein kinase C inhibitor protein 1, KCIP-1)	YWHAZ		+										41
P63244	RACK1_HUMAN	Receptor of activated protein C kinase 1 (Cell proliferation-inducing gene 21 protein) (Guanine nucleotide-binding protein subunit beta-2-like 1) (Guanine nucleotide-binding protein subunit beta-like protein 12.3) (Human lung cancer oncogene 7 protein, HLC-7) (Receptor for activated C kinase) (Small ribosomal subunit protein RACK1) [Cleaved into: Receptor of activated protein C kinase 1, N-termin…	RACK1 GNB2L1 HLC7 PIG21		+										37
P40227	TCPZ_HUMAN	T-complex protein 1 subunit zeta, TCP-1-zeta (Acute morphine dependence-related protein 2) (CCT-zeta-1) (HTR3) (Tcp20)	CCT6A CCT6 CCTZ		+										37
P09382	LEG1_HUMAN	Galectin-1, Gal-1 (14 kDa laminin-binding protein, HLBP14) (14 kDa lectin) (Beta-galactoside-binding lectin L-14-I) (Galaptin) (HBL) (HPL) (Lactose-binding lectin 1) (Lectin galactoside-binding soluble 1) (Putative MAPK-activating protein PM12) (S-Lac lectin 1)	LGALS1		+										33
P36952	SPB5_HUMAN	Serpin B5 (Maspin) (Peptidase inhibitor 5, PI-5)	SERPINB5 PI5		+										31
O75367	H2AY_HUMAN	Core histone macro-H2A.1, Histone macroH2A1, mH2A1 (Histone H2A.y, H2A/y) (Medulloblastoma antigen MU-MB-50.205)	MACROH2A1 H2AFY		+										31
Q02790	FKBP4_HUMAN	Peptidyl-prolyl cis-trans isomerase FKBP4, PPIase FKBP4, EC 5.2.1.8 (51 kDa FK506-binding protein, FKBP51) (52 kDa FK506-binding protein, 52 kDa FKBP, FKBP-52) (59 kDa immunophilin, p59) (FK506-binding protein 4, FKBP-4) (FKBP59) (HSP-binding immunophilin, HBI) (Immunophilin FKBP52) (Rotamase) [Cleaved into: Peptidyl-prolyl cis-trans isomerase FKBP4, N-terminally processed ]	FKBP4 FKBP52		+										28
Q16181	SEPT7_HUMAN	Septin-7 (CDC10 protein homolog)	SEPTIN7 CDC10 SEPT7		+										27
P22314	UBA1_HUMAN	Ubiquitin-like modifier-activating enzyme 1, EC 6.2.1.45 (Protein A1S9) (Ubiquitin-activating enzyme E1)	UBA1 A1S9T UBE1		+										26
Q8NBS9	TXND5_HUMAN	Thioredoxin domain-containing protein 5, EC 1.8.4.-, EC 5.3.4.1 (Endoplasmic reticulum resident protein 46, ER protein 46, ERp46) (Thioredoxin-like protein p46)	TXNDC5 TLP46 UNQ364/PRO700		+										26
Q08J23	NSUN2_HUMAN	RNA cytosine C(5)-methyltransferase NSUN2, EC 2.1.1.- (Myc-induced SUN domain-containing protein, Misu) (NOL1/NOP2/Sun domain family member 2) (Substrate of AIM1/Aurora kinase B) (mRNA cytosine C(5)-methyltransferase, EC 2.1.1.-) (tRNA cytosine C(5)-methyltransferase, EC 2.1.1.-, EC 2.1.1.203) (tRNA methyltransferase 4 homolog, hTrm4)	NSUN2 SAKI TRM4		+										25
Q71DI3	H32_HUMAN	Histone H3.2 (H3-clustered histone 13) (H3-clustered histone 14) (H3-clustered histone 15) (Histone H3/m) (Histone H3/o)	H3C15 HIST2H3A; H3C14 H3F2 H3FM HIST2H3C; H3C13 HIST2H3D		+										25
P84243	H33_HUMAN	Histone H3.3	H3-3A H3.3A H3F3 H3F3A PP781; H3-3B H3.3B H3F3B		+										23
P21291	CSRP1_HUMAN	Cysteine and glycine-rich protein 1 (Cysteine-rich protein 1, CRP, CRP1) (Epididymis luminal protein 141, HEL-141)	CSRP1 CSRP CYRP		+										22
Q06210	GFPT1_HUMAN	Glutamine--fructose-6-phosphate aminotransferase [isomerizing] 1, EC 2.6.1.16 (D-fructose-6-phosphate amidotransferase 1) (Glutamine:fructose-6-phosphate amidotransferase 1, GFAT 1, GFAT1) (Hexosephosphate aminotransferase 1)	GFPT1 GFAT GFPT		+										22
P05161	ISG15_HUMAN	Ubiquitin-like protein ISG15 (Interferon-induced 15 kDa protein) (Interferon-induced 17 kDa protein, IP17) (Ubiquitin cross-reactive protein, hUCRP)	ISG15 G1P2 UCRP		+										21
P61247	RS3A_HUMAN	40S ribosomal protein S3a (Small ribosomal subunit protein eS1) (v-fos transformation effector protein, Fte-1)	RPS3A FTE1 MFTL		+										20
Q16778	H2B2E_HUMAN	Histone H2B type 2-E (H2B-clustered histone 21) (Histone H2B-GL105) (Histone H2B.q, H2B/q)	H2BC21 H2BFQ HIST2H2BE		+										20
Q5QNW6	H2B2F_HUMAN	Histone H2B type 2-F (H2B-clustered histone 18)	H2BC18 HIST2H2BF		+										20
P02768	ALBU_HUMAN	Albumin	ALB GIG20 GIG42 PRO0903 PRO1708 PRO2044 PRO2619 PRO2675 UNQ696/PRO1341		+										19
Q9HB71	CYBP_HUMAN	Calcyclin-binding protein, CacyBP, hCacyBP (S100A6-binding protein) (Siah-interacting protein)	CACYBP S100A6BP SIP PNAS-107		+										18
P52907	CAZA1_HUMAN	F-actin-capping protein subunit alpha-1 (CapZ alpha-1)	CAPZA1		+										18
Q9Y263	PLAP_HUMAN	Phospholipase A-2-activating protein, PLA2P, PLAP	PLAA PLAP		+										17
P55884	EIF3B_HUMAN	Eukaryotic translation initiation factor 3 subunit B, eIF3b (Eukaryotic translation initiation factor 3 subunit 9) (Prt1 homolog, hPrt1) (eIF-3-eta) (eIF3 p110) (eIF3 p116)	EIF3B EIF3S9		+										17
Q16777	H2A2C_HUMAN	Histone H2A type 2-C (H2A-clustered histone 20) (Histone H2A-GL101) (Histone H2A/q)	H2AC20 H2AFQ HIST2H2AC		+										17
P19823	ITIH2_HUMAN	Inter-alpha-trypsin inhibitor heavy chain H2, ITI heavy chain H2, ITI-HC2, Inter-alpha-inhibitor heavy chain 2 (Inter-alpha-trypsin inhibitor complex component II) (Serum-derived hyaluronan-associated protein, SHAP)	ITIH2 IGHEP2		+										17
O95433	AHSA1_HUMAN	Activator of 90 kDa heat shock protein ATPase homolog 1, AHA1 (p38)	AHSA1 C14orf3 HSPC322		+										16
P02765	FETUA_HUMAN	Alpha-2-HS-glycoprotein (Alpha-2-Z-globulin) (Ba-alpha-2-glycoprotein) (Fetuin-A) [Cleaved into: Alpha-2-HS-glycoprotein chain A; Alpha-2-HS-glycoprotein chain B ]	AHSG FETUA PRO2743		+										15
P32119	PRDX2_HUMAN	Peroxiredoxin-2, EC 1.11.1.24 (Natural killer cell-enhancing factor B, NKEF-B) (PRP) (Thiol-specific antioxidant protein, TSA) (Thioredoxin peroxidase 1) (Thioredoxin-dependent peroxide reductase 1) (Thioredoxin-dependent peroxiredoxin 2)	PRDX2 NKEFB TDPX1		+										15
P28066	PSA5_HUMAN	Proteasome subunit alpha type-5 (Macropain zeta chain) (Multicatalytic endopeptidase complex zeta chain) (Proteasome zeta chain)	PSMA5		+										14
P21266	GSTM3_HUMAN	Glutathione S-transferase Mu 3, EC 2.5.1.18 (GST class-mu 3) (GSTM3-3, hGSTM3-3)	GSTM3 GST5		+										14
O43854	EDIL3_HUMAN	EGF-like repeat and discoidin I-like domain-containing protein 3 (Developmentally-regulated endothelial cell locus 1 protein) (Integrin-binding protein DEL1)	EDIL3 DEL1		+										12
Q13347	EIF3I_HUMAN	Eukaryotic translation initiation factor 3 subunit I, eIF3i (Eukaryotic translation initiation factor 3 subunit 2) (TGF-beta receptor-interacting protein 1, TRIP-1) (eIF-3-beta) (eIF3 p36)	EIF3I EIF3S2 TRIP1		+										12
Q96FW1	OTUB1_HUMAN	Ubiquitin thioesterase OTUB1, EC 3.4.19.12 (Deubiquitinating enzyme OTUB1) (OTU domain-containing ubiquitin aldehyde-binding protein 1) (Otubain-1, hOTU1) (Ubiquitin-specific-processing protease OTUB1)	OTUB1 OTB1 OTU1 HSPC263		+										12
P60981	DEST_HUMAN	Destrin (Actin-depolymerizing factor, ADF)	DSTN ACTDP DSN		+										12
P49207	RL34_HUMAN	60S ribosomal protein L34 (Large ribosomal subunit protein eL34)	RPL34		+										12
P13489	RINI_HUMAN	Ribonuclease inhibitor (Placental ribonuclease inhibitor, Placental RNase inhibitor) (Ribonuclease/angiogenin inhibitor 1, RAI)	RNH1 PRI RNH		+										11
Q13765	NACA_HUMAN	Nascent polypeptide-associated complex subunit alpha, NAC-alpha (Alpha-NAC) (allergen Hom s 2)	NACA HSD48		+										11
P42330	AK1C3_HUMAN	Aldo-keto reductase family 1 member C3, EC 1.1.1.-, EC 1.1.1.210, EC 1.1.1.53, EC 1.1.1.62 (17-beta-hydroxysteroid dehydrogenase type 5, 17-beta-HSD 5) (3-alpha-HSD type II, brain) (3-alpha-hydroxysteroid dehydrogenase type 2, 3-alpha-HSD type 2, EC 1.1.1.357) (Chlordecone reductase homolog HAKRb) (Dihydrodiol dehydrogenase 3, DD-3, DD3) (Dihydrodiol dehydrogenase type I) (HA1753) (Prostaglandin …	AKR1C3 DDH1 HSD17B5 KIAA0119 PGFS		+										11
Q13162	PRDX4_HUMAN	Peroxiredoxin-4, EC 1.11.1.24 (Antioxidant enzyme AOE372, AOE37-2) (Peroxiredoxin IV, Prx-IV) (Thioredoxin peroxidase AO372) (Thioredoxin-dependent peroxide reductase A0372) (Thioredoxin-dependent peroxiredoxin 4)	PRDX4		+										11
P22102	PUR2_HUMAN	Trifunctional purine biosynthetic protein adenosine-3 [Includes: Phosphoribosylamine--glycine ligase, EC 6.3.4.13 (Glycinamide ribonucleotide synthetase, GARS) (Phosphoribosylglycinamide synthetase); Phosphoribosylformylglycinamidine cyclo-ligase, EC 6.3.3.1 (AIR synthase, AIRS) (Phosphoribosyl-aminoimidazole synthetase); Phosphoribosylglycinamide formyltransferase, EC 2.1.2.2 (5'-phosphoribosylg…	GART PGFT PRGS		+										10
O95372	LYPA2_HUMAN	Acyl-protein thioesterase 2, APT-2, EC 3.1.2.- (Lysophospholipase II, LPL-II, LysoPLA II) (Palmitoyl-protein hydrolase, EC 3.1.2.22)	LYPLA2 APT2		+										10
P40121	CAPG_HUMAN	Macrophage-capping protein (Actin regulatory protein CAP-G)	CAPG AFCP MCP		+										10
P61088	UBE2N_HUMAN	Ubiquitin-conjugating enzyme E2 N, EC 2.3.2.23 (Bendless-like ubiquitin-conjugating enzyme) (E2 ubiquitin-conjugating enzyme N) (Ubc13) (UbcH13) (Ubiquitin carrier protein N) (Ubiquitin-protein ligase N)	UBE2N BLU		+										10
P53999	TCP4_HUMAN	Activated RNA polymerase II transcriptional coactivator p15 (Positive cofactor 4, PC4) (SUB1 homolog) (p14)	SUB1 PC4 RPO2TC1		+										10
O95747	OXSR1_HUMAN	Serine/threonine-protein kinase OSR1, EC 2.7.11.1 (Oxidative stress-responsive 1 protein)	OXSR1 KIAA1101 OSR1		+										10
P00568	KAD1_HUMAN	Adenylate kinase isoenzyme 1, AK 1, EC 2.7.4.3, EC 2.7.4.6 (ATP-AMP transphosphorylase 1) (ATP:AMP phosphotransferase) (Adenylate monophosphate kinase) (Myokinase)	AK1		+										9
O14950	ML12B_HUMAN	Myosin regulatory light chain 12B (MLC-2A, MLC-2) (Myosin regulatory light chain 2-B, smooth muscle isoform) (Myosin regulatory light chain 20 kDa, MLC20) (Myosin regulatory light chain MRLC2) (SHUJUN-1)	MYL12B MRLC2 MYLC2B		+										9
P09211	GSTP1_HUMAN	Glutathione S-transferase P, EC 2.5.1.18 (GST class-pi) (GSTP1-1)	GSTP1 FAEES3 GST3		+										7
P22061	PIMT_HUMAN	Protein-L-isoaspartate(D-aspartate) O-methyltransferase, PIMT, EC 2.1.1.77 (L-isoaspartyl protein carboxyl methyltransferase) (Protein L-isoaspartyl/D-aspartyl methyltransferase) (Protein-beta-aspartate methyltransferase)	PCMT1		+										7
P25685	DNJB1_HUMAN	DnaJ homolog subfamily B member 1 (DnaJ protein homolog 1) (Heat shock 40 kDa protein 1, HSP40, Heat shock protein 40) (Human DnaJ protein 1, hDj-1)	DNAJB1 DNAJ1 HDJ1 HSPF1		+										7
P41091	IF2G_HUMAN	Eukaryotic translation initiation factor 2 subunit 3, EC 3.6.5.3 (Eukaryotic translation initiation factor 2 subunit gamma X, eIF-2-gamma X, eIF-2gX)	EIF2S3 EIF2G		+										7
P26639	SYTC_HUMAN	Threonine--tRNA ligase 1, cytoplasmic, EC 6.1.1.3 (Threonyl-tRNA synthetase, ThrRS) (Threonyl-tRNA synthetase 1)	TARS1 TARS		+										7
P31949	S10AB_HUMAN	Protein S100-A11 (Calgizzarin) (Metastatic lymph node gene 70 protein, MLN 70) (Protein S100-C) (S100 calcium-binding protein A11) [Cleaved into: Protein S100-A11, N-terminally processed ]	S100A11 MLN70 S100C		+										7
P06753	TPM3_HUMAN	Tropomyosin alpha-3 chain (Gamma-tropomyosin) (Tropomyosin-3) (Tropomyosin-5, hTM5)	TPM3		+										7
P02656	APOC3_HUMAN	Apolipoprotein C-III, Apo-CIII, ApoC-III (Apolipoprotein C3)	APOC3		+										6
P01344	IGF2_HUMAN	Insulin-like growth factor II, IGF-II (Somatomedin-A) (T3M-11-derived growth factor) [Cleaved into: Insulin-like growth factor II; Insulin-like growth factor II Ala-25 Del; Preptin ]	IGF2 PP1446		+										6
Q15404	RSU1_HUMAN	Ras suppressor protein 1, RSP-1, Rsu-1	RSU1 RSP1		+										5
P05452	TETN_HUMAN	Tetranectin, TN (C-type lectin domain family 3 member B) (Plasminogen kringle 4-binding protein)	CLEC3B TNA		+										5
P23381	SYWC_HUMAN	Tryptophan--tRNA ligase, cytoplasmic, EC 6.1.1.2 (Interferon-induced protein 53, IFP53) (Tryptophanyl-tRNA synthetase, TrpRS, hWRS) [Cleaved into: T1-TrpRS; T2-TrpRS ]	WARS1 IFI53 WARS WRS		+										5
O00622	CCN1_HUMAN	CCN family member 1 (Cellular communication network factor 1) (Cysteine-rich angiogenic inducer 61) (Insulin-like growth factor-binding protein 10, IBP-10, IGF-binding protein 10, IGFBP-10) (Protein CYR61) (Protein GIG1)	CCN1 CYR61 GIG1 IGFBP10		+										5
P35268	RL22_HUMAN	60S ribosomal protein L22 (EBER-associated protein, EAP) (Epstein-Barr virus small RNA-associated protein) (Heparin-binding protein HBp15) (Large ribosomal subunit protein eL22)	RPL22		+										5
Q9P2R7	SUCB1_HUMAN	Succinate--CoA ligase [ADP-forming] subunit beta, mitochondrial, EC 6.2.1.5 (ATP-specific succinyl-CoA synthetase subunit beta, A-SCS) (Succinyl-CoA synthetase beta-A chain, SCS-betaA)	SUCLA2		+										5
P61163	ACTZ_HUMAN	Alpha-centractin, Centractin (ARP1) (Actin-RPV) (Centrosome-associated actin homolog)	ACTR1A CTRN1		+										5
O60701	UGDH_HUMAN	UDP-glucose 6-dehydrogenase, UDP-Glc dehydrogenase, UDP-GlcDH, UDPGDH, EC 1.1.1.22	UGDH		+										5
Q15181	IPYR_HUMAN	Inorganic pyrophosphatase, EC 3.6.1.1 (Pyrophosphate phospho-hydrolase, PPase)	PPA1 IOPPP PP		+										4
Q04837	SSBP_HUMAN	Single-stranded DNA-binding protein, mitochondrial, Mt-SSB, MtSSB (PWP1-interacting protein 17)	SSBP1 SSBP		+										4
Q14195	DPYL3_HUMAN	Dihydropyrimidinase-related protein 3, DRP-3 (Collapsin response mediator protein 4, CRMP-4) (Unc-33-like phosphoprotein 1, ULIP-1)	DPYSL3 CRMP4 DRP3 ULIP ULIP1		+										4
P02774	VTDB_HUMAN	Vitamin D-binding protein, DBP, VDB (Gc protein-derived macrophage activating factor, Gc-MAF, GcMAF) (Gc-globulin) (Group-specific component, Gc) (Vitamin D-binding protein-macrophage activating factor, DBP-maf)	GC		+										4
Q8IZP2	ST134_HUMAN	Putative protein FAM10A4 (Suppression of tumorigenicity 13 pseudogene 4)	ST13P4 FAM10A4		+										4
P02794	FRIH_HUMAN	Ferritin heavy chain, Ferritin H subunit, EC 1.16.3.1 (Cell proliferation-inducing gene 15 protein) [Cleaved into: Ferritin heavy chain, N-terminally processed ]	FTH1 FTH FTHL6 OK/SW-cl.84 PIG15		+										4
P54289	CA2D1_HUMAN	Voltage-dependent calcium channel subunit alpha-2/delta-1 (Voltage-gated calcium channel subunit alpha-2/delta-1) [Cleaved into: Voltage-dependent calcium channel subunit alpha-2-1; Voltage-dependent calcium channel subunit delta-1 ]	CACNA2D1 CACNL2A CCHL2A MHS3		+										4
Q13404	UB2V1_HUMAN	Ubiquitin-conjugating enzyme E2 variant 1, UEV-1 (CROC-1) (TRAF6-regulated IKK activator 1 beta Uev1A)	UBE2V1 CROC1 UBE2V UEV1 P/OKcl.19		+										4
P20839	IMDH1_HUMAN	Inosine-5'-monophosphate dehydrogenase 1, IMP dehydrogenase 1, IMPD 1, IMPDH 1, EC 1.1.1.205 (IMPDH-I)	IMPDH1 IMPD1		+										4
Q7Z4R8	CF120_HUMAN	UPF0669 protein C6orf120	C6orf120		+										3
A8MQ03	CRTP1_HUMAN	Cysteine-rich tail protein 1	CYSRT1 C9orf169		+										3
Q8TAA3	PSMA8_HUMAN	Proteasome subunit alpha-type 8 (Proteasome alpha 4 subunit, Alpha4s) (Proteasome subunit alpha-type 7-like)	PSMA8 PSMA7L		+										3
P10599	THIO_HUMAN	Thioredoxin, Trx (ATL-derived factor, ADF) (Surface-associated sulphydryl protein, SASP) (allergen Hom s Trx)	TXN TRDX TRX TRX1		+										3
P06730	IF4E_HUMAN	Eukaryotic translation initiation factor 4E, eIF-4E, eIF4E (eIF-4F 25 kDa subunit) (mRNA cap-binding protein)	EIF4E EIF4EL1 EIF4F		+										3
Q9NZT1	CALL5_HUMAN	Calmodulin-like protein 5 (Calmodulin-like skin protein)	CALML5 CLSP		+										3
Q16543	CDC37_HUMAN	Hsp90 co-chaperone Cdc37 (Hsp90 chaperone protein kinase-targeting subunit) (p50Cdc37) [Cleaved into: Hsp90 co-chaperone Cdc37, N-terminally processed ]	CDC37 CDC37A		+										3
P07148	FABPL_HUMAN	Fatty acid-binding protein, liver (Fatty acid-binding protein 1) (Liver-type fatty acid-binding protein, L-FABP)	FABP1 FABPL		+										3
Q86YZ3	HORN_HUMAN	Hornerin	HRNR S100A18		+										3
P10745	RET3_HUMAN	Retinol-binding protein 3 (Interphotoreceptor retinoid-binding protein, IRBP) (Interstitial retinol-binding protein)	RBP3		+										3
P52209	6PGD_HUMAN	6-phosphogluconate dehydrogenase, decarboxylating, EC 1.1.1.44	PGD PGDH		+										2
P59998	ARPC4_HUMAN	Actin-related protein 2/3 complex subunit 4 (Arp2/3 complex 20 kDa subunit, p20-ARC)	ARPC4 ARC20		+										2
P23526	SAHH_HUMAN	Adenosylhomocysteinase, AdoHcyase, EC 3.3.1.1 (S-adenosyl-L-homocysteine hydrolase)	AHCY SAHH		+										2
Q9UNP9	PPIE_HUMAN	Peptidyl-prolyl cis-trans isomerase E, PPIase E, EC 5.2.1.8 (Cyclophilin E) (Cyclophilin-33) (Rotamase E)	PPIE CYP33		+										2
Q8WZ42	TITIN_HUMAN	Titin, EC 2.7.11.1 (Connectin) (Rhabdomyosarcoma antigen MU-RMS-40.14)	TTN		+										2
Q15435	PP1R7_HUMAN	Protein phosphatase 1 regulatory subunit 7 (Protein phosphatase 1 regulatory subunit 22)	PPP1R7 SDS22		+										2
Q8N302	AGGF1_HUMAN	Angiogenic factor with G patch and FHA domains 1 (Angiogenic factor VG5Q, hVG5Q) (G patch domain-containing protein 7) (Vasculogenesis gene on 5q protein)	AGGF1 GPATC7 GPATCH7 VG5Q		+										2
Q6ZMP0	THSD4_HUMAN	Thrombospondin type-1 domain-containing protein 4 (A disintegrin and metalloproteinase with thrombospondin motifs-like protein 6, ADAMTS-like protein 6, ADAMTSL-6)	THSD4 UNQ9334/PRO34005		+										2
P35270	SPRE_HUMAN	Sepiapterin reductase, SPR, EC 1.1.1.153	SPR		+										1
O75828	CBR3_HUMAN	Carbonyl reductase [NADPH] 3, EC 1.1.1.184 (NADPH-dependent carbonyl reductase 3) (Quinone reductase CBR3, EC 1.6.5.10) (Short chain dehydrogenase/reductase family 21C member 2)	CBR3 SDR21C2		+										1
O95347	SMC2_HUMAN	Structural maintenance of chromosomes protein 2, SMC protein 2, SMC-2 (Chromosome-associated protein E, hCAP-E) (XCAP-E homolog)	SMC2 CAPE SMC2L1 PRO0324		+										1
Q13751	LAMB3_HUMAN	Laminin subunit beta-3 (Epiligrin subunit bata) (Kalinin B1 chain) (Kalinin subunit beta) (Laminin B1k chain) (Laminin-5 subunit beta) (Nicein subunit beta)	LAMB3 LAMNB1		+										1
Q9P000	COMD9_HUMAN	COMM domain-containing protein 9	COMMD9 HSPC166		+										1
P54577	SYYC_HUMAN	Tyrosine--tRNA ligase, cytoplasmic, EC 6.1.1.1 (Tyrosyl-tRNA synthetase, TyrRS) [Cleaved into: Tyrosine--tRNA ligase, cytoplasmic, N-terminally processed ]	YARS1 YARS		+										1
P24752	THIL_HUMAN	Acetyl-CoA acetyltransferase, mitochondrial, EC 2.3.1.9 (Acetoacetyl-CoA thiolase) (T2)	ACAT1 ACAT MAT		+										1
P30085	KCY_HUMAN	UMP-CMP kinase, EC 2.7.4.14 (Deoxycytidylate kinase, CK, dCMP kinase) (Nucleoside-diphosphate kinase, EC 2.7.4.6) (Uridine monophosphate/cytidine monophosphate kinase, UMP/CMP kinase, UMP/CMPK)	CMPK1 CMK CMPK UCK UMK UMPK		+										1
P28072	PSB6_HUMAN	Proteasome subunit beta type-6, EC 3.4.25.1 (Macropain delta chain) (Multicatalytic endopeptidase complex delta chain) (Proteasome delta chain) (Proteasome subunit Y)	PSMB6 LMPY Y		+										1
Q13620	CUL4B_HUMAN	Cullin-4B, CUL-4B	CUL4B KIAA0695		+										1
P56537	IF6_HUMAN	Eukaryotic translation initiation factor 6, eIF-6 (B(2)GCN homolog) (B4 integrin interactor) (CAB) (p27(BBP))	EIF6 EIF3A ITGB4BP OK/SW-cl.27		+										1
P26447	S10A4_HUMAN	Protein S100-A4 (Calvasculin) (Metastasin) (Placental calcium-binding protein) (Protein Mts1) (S100 calcium-binding protein A4)	S100A4 CAPL MTS1		+										1
Q9HCD5	NCOA5_HUMAN	Nuclear receptor coactivator 5, NCoA-5 (Coactivator independent of AF-2, CIA)	NCOA5 KIAA1637		+										1
Q8NB25	F184A_HUMAN	Protein FAM184A	FAM184A C6orf60		+										1
Q14116	IL18_HUMAN	Interleukin-18, IL-18 (Iboctadekin) (Interferon gamma-inducing factor, IFN-gamma-inducing factor) (Interleukin-1 gamma, IL-1 gamma)	IL18 IGIF IL1F4		+										1
Q8TE73	DYH5_HUMAN	Dynein axonemal heavy chain 5 (Axonemal beta dynein heavy chain 5) (Ciliary dynein heavy chain 5)	DNAH5 DNAHC5 HL1 KIAA1603		+										1
Q9BQE3	TBA1C_HUMAN	Tubulin alpha-1C chain (Alpha-tubulin 6) (Tubulin alpha-6 chain) [Cleaved into: Detyrosinated tubulin alpha-1C chain ]	TUBA1C TUBA6			+									187
P11498	PYC_HUMAN	Pyruvate carboxylase, mitochondrial, EC 6.4.1.1 (Pyruvic carboxylase, PCB)	PC			+									68
O94925	GLSK_HUMAN	Glutaminase kidney isoform, mitochondrial, GLS, EC 3.5.1.2 (K-glutaminase) (L-glutamine amidohydrolase) [Cleaved into: Glutaminase kidney isoform, mitochondrial 68 kDa chain; Glutaminase kidney isoform, mitochondrial 65 kDa chain ]	GLS GLS1 KIAA0838			+									47
Q13838	DX39B_HUMAN	Spliceosome RNA helicase DDX39B, EC 3.6.4.13 (56 kDa U2AF65-associated protein) (ATP-dependent RNA helicase p47) (DEAD box protein UAP56) (HLA-B-associated transcript 1 protein)	DDX39B BAT1 UAP56			+									40
Q12769	NU160_HUMAN	Nuclear pore complex protein Nup160 (160 kDa nucleoporin) (Nucleoporin Nup160)	NUP160 KIAA0197 NUP120			+									38
P42166	LAP2A_HUMAN	Lamina-associated polypeptide 2, isoform alpha (Thymopoietin isoform alpha, TP alpha) (Thymopoietin-related peptide isoform alpha, TPRP isoform alpha) [Cleaved into: Thymopoietin, TP (Splenin); Thymopentin (TP5) ]	TMPO LAP2			+									37
Q13263	TIF1B_HUMAN	Transcription intermediary factor 1-beta, TIF1-beta (E3 SUMO-protein ligase TRIM28, EC 2.3.2.27) (KRAB-associated protein 1, KAP-1) (KRAB-interacting protein 1, KRIP-1) (Nuclear corepressor KAP-1) (RING finger protein 96) (RING-type E3 ubiquitin transferase TIF1-beta) (Tripartite motif-containing protein 28)	TRIM28 KAP1 RNF96 TIF1B			+									34
O43809	CPSF5_HUMAN	Cleavage and polyadenylation specificity factor subunit 5 (Cleavage and polyadenylation specificity factor 25 kDa subunit, CPSF 25 kDa subunit) (Cleavage factor Im complex 25 kDa subunit, CFIm25) (Nucleoside diphosphate-linked moiety X motif 21, Nudix motif 21) (Nudix hydrolase 21) (Pre-mRNA cleavage factor Im 68 kDa subunit)	NUDT21 CFIM25 CPSF25 CPSF5			+									33
P55809	SCOT1_HUMAN	Succinyl-CoA:3-ketoacid coenzyme A transferase 1, mitochondrial, SCOT, EC 2.8.3.5 (3-oxoacid CoA-transferase 1) (Somatic-type succinyl-CoA:3-oxoacid CoA-transferase, SCOT-s) (Succinyl-CoA:3-oxoacid CoA transferase)	OXCT1 OXCT SCOT			+									32
Q15645	PCH2_HUMAN	Pachytene checkpoint protein 2 homolog (Human papillomavirus type 16 E1 protein-binding protein, 16E1-BP, HPV16 E1 protein-binding protein) (Thyroid hormone receptor interactor 13) (Thyroid receptor-interacting protein 13, TR-interacting protein 13, TRIP-13)	TRIP13 PCH2			+									32
P52895	AK1C2_HUMAN	Aldo-keto reductase family 1 member C2, EC 1.-.-.-, EC 1.1.1.112, EC 1.1.1.209, EC 1.1.1.53, EC 1.1.1.62, EC 1.3.1.20 (3-alpha-HSD3) (Chlordecone reductase homolog HAKRD) (Dihydrodiol dehydrogenase 2, DD-2, DD2) (Dihydrodiol dehydrogenase/bile acid-binding protein, DD/BABP) (Type III 3-alpha-hydroxysteroid dehydrogenase, EC 1.1.1.357)	AKR1C2 DDH2			+									30
Q9Y266	NUDC_HUMAN	Nuclear migration protein nudC (Nuclear distribution protein C homolog)	NUDC			+									30
P62495	ERF1_HUMAN	Eukaryotic peptide chain release factor subunit 1, Eukaryotic release factor 1, eRF1 (Protein Cl1) (TB3-1)	ETF1 ERF1 RF1 SUP45L1			+									28
O43143	DHX15_HUMAN	ATP-dependent RNA helicase DHX15, EC 3.6.4.13 (ATP-dependent RNA helicase #46) (DEAH box protein 15) (Splicing factor Prp43, hPrp43)	DHX15 DBP1 DDX15			+									28
O95816	BAG2_HUMAN	BAG family molecular chaperone regulator 2, BAG-2 (Bcl-2-associated athanogene 2)	BAG2			+									28
A6NHL2	TBAL3_HUMAN	Tubulin alpha chain-like 3	TUBAL3			+									28
P50213	IDH3A_HUMAN	Isocitrate dehydrogenase [NAD] subunit alpha, mitochondrial, EC 1.1.1.41 (Isocitric dehydrogenase subunit alpha) (NAD(+)-specific ICDH subunit alpha)	IDH3A			+									27
Q13148	TADBP_HUMAN	TAR DNA-binding protein 43, TDP-43	TARDBP TDP43			+									26
Q9Y2Z0	SGT1_HUMAN	Protein SGT1 homolog (Protein 40-6-3) (Sgt1) (Suppressor of G2 allele of SKP1 homolog)	SUGT1			+									26
Q27J81	INF2_HUMAN	Inverted formin-2 (HBEBP2-binding protein C)	INF2 C14orf151 C14orf173			+									25
Q7L2E3	DHX30_HUMAN	ATP-dependent RNA helicase DHX30, EC 3.6.4.13 (DEAH box protein 30)	DHX30 DDX30 KIAA0890			+									25
P23921	RIR1_HUMAN	Ribonucleoside-diphosphate reductase large subunit, EC 1.17.4.1 (Ribonucleoside-diphosphate reductase subunit M1) (Ribonucleotide reductase large subunit)	RRM1 RR1			+									24
Q9NVA2	SEP11_HUMAN	Septin-11	SEPTIN11 SEPT11			+									23
Q01995	TAGL_HUMAN	Transgelin (22 kDa actin-binding protein) (Protein WS3-10) (Smooth muscle protein 22-alpha, SM22-alpha)	TAGLN SM22 WS3-10			+									23
P30837	AL1B1_HUMAN	Aldehyde dehydrogenase X, mitochondrial, EC 1.2.1.3 (Aldehyde dehydrogenase 5) (Aldehyde dehydrogenase family 1 member B1)	ALDH1B1 ALDH5 ALDHX			+									22
P31942	HNRH3_HUMAN	Heterogeneous nuclear ribonucleoprotein H3, hnRNP H3 (Heterogeneous nuclear ribonucleoprotein 2H9, hnRNP 2H9)	HNRNPH3 HNRPH3			+									21
P18583	SON_HUMAN	Protein SON (Bax antagonist selected in saccharomyces 1, BASS1) (Negative regulatory element-binding protein, NRE-binding protein) (Protein DBP-5) (SON3)	SON C21orf50 DBP5 KIAA1019 NREBP HSPC310 HSPC312			+									20
Q9NR31	SAR1A_HUMAN	GTP-binding protein SAR1a (COPII-associated small GTPase)	SAR1A SAR1 SARA SARA1			+									20
Q56VL3	OCAD2_HUMAN	OCIA domain-containing protein 2 (Ovarian carcinoma immunoreactive antigen-like protein)	OCIAD2			+									20
O75533	SF3B1_HUMAN	Splicing factor 3B subunit 1 (Pre-mRNA-splicing factor SF3b 155 kDa subunit, SF3b155) (Spliceosome-associated protein 155, SAP 155)	SF3B1 SAP155			+									19
Q96PK6	RBM14_HUMAN	RNA-binding protein 14 (Paraspeckle protein 2, PSP2) (RNA-binding motif protein 14) (RRM-containing coactivator activator/modulator) (Synaptotagmin-interacting protein, SYT-interacting protein)	RBM14 SIP			+									19
P35637	FUS_HUMAN	RNA-binding protein FUS (75 kDa DNA-pairing protein) (Oncogene FUS) (Oncogene TLS) (POMp75) (Translocated in liposarcoma protein)	FUS TLS			+									18
Q9H3U1	UN45A_HUMAN	Protein unc-45 homolog A, Unc-45A (GCUNC-45) (Smooth muscle cell-associated protein 1, SMAP-1)	UNC45A SMAP1			+									16
P45974	UBP5_HUMAN	Ubiquitin carboxyl-terminal hydrolase 5, EC 3.4.19.12 (Deubiquitinating enzyme 5) (Isopeptidase T) (Ubiquitin thioesterase 5) (Ubiquitin-specific-processing protease 5)	USP5 ISOT			+									16
Q99567	NUP88_HUMAN	Nuclear pore complex protein Nup88 (88 kDa nucleoporin) (Nucleoporin Nup88)	NUP88			+									16
Q13085	ACACA_HUMAN	Acetyl-CoA carboxylase 1, ACC1, EC 6.4.1.2 (Acetyl-Coenzyme A carboxylase alpha, ACC-alpha)	ACACA ACAC ACC1 ACCA			+									15
P32322	P5CR1_HUMAN	Pyrroline-5-carboxylate reductase 1, mitochondrial, P5C reductase 1, P5CR 1, EC 1.5.1.2	PYCR1			+									15
Q99733	NP1L4_HUMAN	Nucleosome assembly protein 1-like 4 (Nucleosome assembly protein 2, NAP-2)	NAP1L4 NAP2			+									15
O15061	SYNEM_HUMAN	Synemin (Desmuslin)	SYNM DMN KIAA0353 SYN			+									15
Q13283	G3BP1_HUMAN	Ras GTPase-activating protein-binding protein 1, G3BP-1, EC 3.6.4.12, EC 3.6.4.13 (ATP-dependent DNA helicase VIII, hDH VIII) (GAP SH3 domain-binding protein 1)	G3BP1 G3BP			+									15
P35658	NU214_HUMAN	Nuclear pore complex protein Nup214 (214 kDa nucleoporin) (Nucleoporin Nup214) (Protein CAN)	NUP214 CAIN CAN KIAA0023			+									15
Q7Z2W4	ZCCHV_HUMAN	Zinc finger CCCH-type antiviral protein 1 (ADP-ribosyltransferase diphtheria toxin-like 13, ARTD13) (Inactive Poly [ADP-ribose] polymerase 13, PARP13) (Zinc finger CCCH domain-containing protein 2) (Zinc finger antiviral protein, ZAP)	ZC3HAV1 ZC3HDC2 PRO1677			+									14
Q9UQE7	SMC3_HUMAN	Structural maintenance of chromosomes protein 3, SMC protein 3, SMC-3 (Basement membrane-associated chondroitin proteoglycan, Bamacan) (Chondroitin sulfate proteoglycan 6) (Chromosome-associated polypeptide, hCAP)	SMC3 BAM BMH CSPG6 SMC3L1			+									14
Q09028	RBBP4_HUMAN	Histone-binding protein RBBP4 (Chromatin assembly factor 1 subunit C, CAF-1 subunit C) (Chromatin assembly factor I p48 subunit, CAF-I 48 kDa subunit, CAF-I p48) (Nucleosome-remodeling factor subunit RBAP48) (Retinoblastoma-binding protein 4, RBBP-4) (Retinoblastoma-binding protein p48)	RBBP4 RBAP48			+									14
Q96BQ5	CC127_HUMAN	Coiled-coil domain-containing protein 127	CCDC127			+									14
P60604	UB2G2_HUMAN	Ubiquitin-conjugating enzyme E2 G2, EC 2.3.2.23 (E2 ubiquitin-conjugating enzyme G2) (Ubiquitin carrier protein G2) (Ubiquitin-protein ligase G2)	UBE2G2 UBC7			+									14
P11177	ODPB_HUMAN	Pyruvate dehydrogenase E1 component subunit beta, mitochondrial, PDHE1-B, EC 1.2.4.1	PDHB PHE1B			+									13
P29692	EF1D_HUMAN	Elongation factor 1-delta, EF-1-delta (Antigen NY-CO-4)	EEF1D EF1D			+									13
Q15185	TEBP_HUMAN	Prostaglandin E synthase 3, EC 5.3.99.3 (Cytosolic prostaglandin E2 synthase, cPGES) (Hsp90 co-chaperone) (Progesterone receptor complex p23) (Telomerase-binding protein p23)	PTGES3 P23 TEBP			+									13
P18621	RL17_HUMAN	60S ribosomal protein L17 (60S ribosomal protein L23) (Large ribosomal subunit protein uL22) (PD-1)	RPL17			+									13
Q8IY81	SPB1_HUMAN	pre-rRNA 2'-O-ribose RNA methyltransferase FTSJ3, EC 2.1.1.- (Protein ftsJ homolog 3) (Putative rRNA methyltransferase 3)	FTSJ3 SB92			+									12
Q9UHD8	SEPT9_HUMAN	Septin-9 (MLL septin-like fusion protein MSF-A, MLL septin-like fusion protein) (Ovarian/Breast septin, Ov/Br septin) (Septin D1)	SEPTIN9 KIAA0991 MSF SEPT9			+									12
Q9H8H0	NOL11_HUMAN	Nucleolar protein 11	NOL11 L14			+									12
P51553	IDH3G_HUMAN	Isocitrate dehydrogenase [NAD] subunit gamma, mitochondrial (Isocitric dehydrogenase subunit gamma) (NAD(+)-specific ICDH subunit gamma)	IDH3G			+									12
Q14192	FHL2_HUMAN	Four and a half LIM domains protein 2, FHL-2 (LIM domain protein DRAL) (Skeletal muscle LIM-protein 3, SLIM-3)	FHL2 DRAL SLIM3			+									12
Q16576	RBBP7_HUMAN	Histone-binding protein RBBP7 (Histone acetyltransferase type B subunit 2) (Nucleosome-remodeling factor subunit RBAP46) (Retinoblastoma-binding protein 7, RBBP-7) (Retinoblastoma-binding protein p46)	RBBP7 RBAP46			+									12
Q8NBQ5	DHB11_HUMAN	Estradiol 17-beta-dehydrogenase 11, EC 1.1.1.62 (17-beta-hydroxysteroid dehydrogenase 11, 17-beta-HSD 11, 17bHSD11, 17betaHSD11) (17-beta-hydroxysteroid dehydrogenase XI, 17-beta-HSD XI, 17betaHSDXI) (Cutaneous T-cell lymphoma-associated antigen HD-CL-03, CTCL-associated antigen HD-CL-03) (Dehydrogenase/reductase SDR family member 8) (Retinal short-chain dehydrogenase/reductase 2, retSDR2) (Short…	HSD17B11 DHRS8 PAN1B SDR16C2 PSEC0029 UNQ207/PRO233			+									12
Q9NTJ3	SMC4_HUMAN	Structural maintenance of chromosomes protein 4, SMC protein 4, SMC-4 (Chromosome-associated polypeptide C, hCAP-C) (XCAP-C homolog)	SMC4 CAPC SMC4L1			+									12
Q9UPQ0	LIMC1_HUMAN	LIM and calponin homology domains-containing protein 1	LIMCH1 KIAA1102			+									11
P13804	ETFA_HUMAN	Electron transfer flavoprotein subunit alpha, mitochondrial, Alpha-ETF	ETFA			+									11
O43399	TPD54_HUMAN	Tumor protein D54, hD54 (Tumor protein D52-like 2)	TPD52L2			+									11
P47897	SYQ_HUMAN	Glutamine--tRNA ligase, EC 6.1.1.18 (Glutaminyl-tRNA synthetase, GlnRS)	QARS1 QARS			+									11
P52294	IMA5_HUMAN	Importin subunit alpha-5 (Karyopherin subunit alpha-1) (Nucleoprotein interactor 1, NPI-1) (RAG cohort protein 2) (SRP1-beta) [Cleaved into: Importin subunit alpha-5, N-terminally processed ]	KPNA1 RCH2			+									11
P61011	SRP54_HUMAN	Signal recognition particle 54 kDa protein, SRP54, EC 3.6.5.-	SRP54			+									11
Q14671	PUM1_HUMAN	Pumilio homolog 1, HsPUM, Pumilio-1	PUM1 KIAA0099 PUMH1			+									11
Q13310	PABP4_HUMAN	Polyadenylate-binding protein 4, PABP-4, Poly(A)-binding protein 4 (Activated-platelet protein 1, APP-1) (Inducible poly(A)-binding protein, iPABP)	PABPC4 APP1 PABP4			+									10
Q9Y305	ACOT9_HUMAN	Acyl-coenzyme A thioesterase 9, mitochondrial, Acyl-CoA thioesterase 9, EC 3.1.2.- (Acyl-CoA thioester hydrolase 9)	ACOT9 CGI-16			+									10
Q9BWF3	RBM4_HUMAN	RNA-binding protein 4 (Lark homolog, hLark) (RNA-binding motif protein 4) (RNA-binding motif protein 4a)	RBM4 RBM4A			+									10
Q15061	WDR43_HUMAN	WD repeat-containing protein 43 (U3 small nucleolar RNA-associated protein 5 homolog)	WDR43 KIAA0007 UTP5			+									10
P15170	ERF3A_HUMAN	Eukaryotic peptide chain release factor GTP-binding subunit ERF3A, Eukaryotic peptide chain release factor subunit 3a, eRF3a (G1 to S phase transition protein 1 homolog)	GSPT1 ERF3A			+									10
Q9UHX1	PUF60_HUMAN	Poly(U)-binding-splicing factor PUF60 (60 kDa poly(U)-binding-splicing factor) (FUSE-binding protein-interacting repressor, FBP-interacting repressor) (Ro-binding protein 1, RoBP1) (Siah-binding protein 1, Siah-BP1)	PUF60 FIR ROBPI SIAHBP1			+									10
O43390	HNRPR_HUMAN	Heterogeneous nuclear ribonucleoprotein R, hnRNP R	HNRNPR HNRPR			+									10
Q16401	PSMD5_HUMAN	26S proteasome non-ATPase regulatory subunit 5 (26S protease subunit S5 basic) (26S proteasome subunit S5B)	PSMD5 KIAA0072			+									10
Q9NR12	PDLI7_HUMAN	PDZ and LIM domain protein 7 (LIM mineralization protein, LMP) (Protein enigma)	PDLIM7 ENIGMA			+									10
O60264	SMCA5_HUMAN	SWI/SNF-related matrix-associated actin-dependent regulator of chromatin subfamily A member 5, SWI/SNF-related matrix-associated actin-dependent regulator of chromatin A5, EC 3.6.4.- (Sucrose nonfermenting protein 2 homolog, hSNF2H)	SMARCA5 SNF2H WCRF135			+									10
P23246	SFPQ_HUMAN	Splicing factor, proline- and glutamine-rich (100 kDa DNA-pairing protein, hPOMp100) (DNA-binding p52/p100 complex, 100 kDa subunit) (Polypyrimidine tract-binding protein-associated-splicing factor, PSF, PTB-associated-splicing factor)	SFPQ PSF			+									10
P42677	RS27_HUMAN	40S ribosomal protein S27 (Metallopan-stimulin 1, MPS-1) (Small ribosomal subunit protein eS27)	RPS27 MPS1			+									10
P02042	HBD_HUMAN	Hemoglobin subunit delta (Delta-globin) (Hemoglobin delta chain)	HBD			+									10
O00425	IF2B3_HUMAN	Insulin-like growth factor 2 mRNA-binding protein 3, IGF2 mRNA-binding protein 3, IMP-3 (IGF-II mRNA-binding protein 3) (KH domain-containing protein overexpressed in cancer, hKOC) (VICKZ family member 3)	IGF2BP3 IMP3 KOC1 VICKZ3			+									9
P84090	ERH_HUMAN	Enhancer of rudimentary homolog	ERH			+									9
P35250	RFC2_HUMAN	Replication factor C subunit 2 (Activator 1 40 kDa subunit, A1 40 kDa subunit) (Activator 1 subunit 2) (Replication factor C 40 kDa subunit, RF-C 40 kDa subunit, RFC40)	RFC2			+									9
Q9Y5Y2	NUBP2_HUMAN	Cytosolic Fe-S cluster assembly factor NUBP2 (Nucleotide-binding protein 2, NBP 2)	NUBP2			+									9
Q9UI30	TR112_HUMAN	Multifunctional methyltransferase subunit TRM112-like protein (tRNA methyltransferase 112 homolog)	TRMT112 AD-001 HSPC152 HSPC170			+									9
P51991	ROA3_HUMAN	Heterogeneous nuclear ribonucleoprotein A3, hnRNP A3	HNRNPA3 HNRPA3			+									9
P24941	CDK2_HUMAN	Cyclin-dependent kinase 2, EC 2.7.11.22 (Cell division protein kinase 2) (p33 protein kinase)	CDK2 CDKN2			+									9
Q8WUF5	IASPP_HUMAN	RelA-associated inhibitor (Inhibitor of ASPP protein, Protein iASPP) (NFkB-interacting protein 1) (PPP1R13B-like protein)	PPP1R13L IASPP NKIP1 PPP1R13BL RAI			+									8
P43897	EFTS_HUMAN	Elongation factor Ts, mitochondrial, EF-Ts, EF-TsMt	TSFM			+									8
P00367	DHE3_HUMAN	Glutamate dehydrogenase 1, mitochondrial, GDH 1, EC 1.4.1.3	GLUD1 GLUD			+									8
Q01081	U2AF1_HUMAN	Splicing factor U2AF 35 kDa subunit (U2 auxiliary factor 35 kDa subunit) (U2 small nuclear RNA auxiliary factor 1) (U2 snRNP auxiliary factor small subunit)	U2AF1 U2AF35 U2AFBP FP793			+									8
Q14498	RBM39_HUMAN	RNA-binding protein 39 (CAPER alpha, CAPERalpha) (Hepatocellular carcinoma protein 1) (RNA-binding motif protein 39) (RNA-binding region-containing protein 2) (Splicing factor HCC1)	RBM39 HCC1 RNPC2			+									8
Q96C36	P5CR2_HUMAN	Pyrroline-5-carboxylate reductase 2, P5C reductase 2, P5CR 2, EC 1.5.1.2	PYCR2			+									8
P11172	UMPS_HUMAN	Uridine 5'-monophosphate synthase, UMP synthase [Includes: Orotate phosphoribosyltransferase, OPRT, OPRTase, EC 2.4.2.10; Orotidine 5'-phosphate decarboxylase, ODC, OMPD, EC 4.1.1.23 (OMPdecase) ]	UMPS OK/SW-cl.21			+									8
Q53S08	RAB6D_HUMAN	Ras-related protein Rab-6D (Rab6-like protein WTH3DI)	RAB6D WTH3DI			+									8
Q8IZW8	TENS4_HUMAN	Tensin-4 (C-terminal tensin-like protein)	TNS4 CTEN PP14434			+									8
P61081	UBC12_HUMAN	NEDD8-conjugating enzyme Ubc12, EC 2.3.2.34 (NEDD8 carrier protein) (Ubiquitin-conjugating enzyme E2 M)	UBE2M UBC12			+									8
P15927	RFA2_HUMAN	Replication protein A 32 kDa subunit, RP-A p32 (Replication factor A protein 2, RF-A protein 2) (Replication protein A 34 kDa subunit, RP-A p34)	RPA2 REPA2 RPA32 RPA34			+									8
Q09161	NCBP1_HUMAN	Nuclear cap-binding protein subunit 1 (80 kDa nuclear cap-binding protein, CBP80, NCBP 80 kDa subunit)	NCBP1 CBP80 NCBP			+									7
Q9H4I3	TRABD_HUMAN	TraB domain-containing protein (Protein TTG2)	TRABD TTG2 PP2447			+									7
Q02241	KIF23_HUMAN	Kinesin-like protein KIF23 (Kinesin-like protein 5) (Mitotic kinesin-like protein 1)	KIF23 KNSL5 MKLP1			+									7
Q15369	ELOC_HUMAN	Elongin-C, EloC (Elongin 15 kDa subunit) (RNA polymerase II transcription factor SIII subunit C) (SIII p15) (Transcription elongation factor B polypeptide 1)	ELOC TCEB1			+									7
Q9NSE4	SYIM_HUMAN	Isoleucine--tRNA ligase, mitochondrial, EC 6.1.1.5 (Isoleucyl-tRNA synthetase, IleRS)	IARS2			+									7
O60518	RNBP6_HUMAN	Ran-binding protein 6, RanBP6	RANBP6			+									7
Q14141	SEPT6_HUMAN	Septin-6	SEPTIN6 KIAA0128 SEP2 SEPT6			+									7
O00505	IMA4_HUMAN	Importin subunit alpha-4 (Importin alpha Q2, Qip2) (Karyopherin subunit alpha-3) (SRP1-gamma)	KPNA3 QIP2			+									7
Q15417	CNN3_HUMAN	Calponin-3 (Calponin, acidic isoform)	CNN3			+									7
P61086	UBE2K_HUMAN	Ubiquitin-conjugating enzyme E2 K, EC 2.3.2.23 (E2 ubiquitin-conjugating enzyme K) (Huntingtin-interacting protein 2, HIP-2) (Ubiquitin carrier protein) (Ubiquitin-conjugating enzyme E2-25 kDa, Ubiquitin-conjugating enzyme E2(25K), Ubiquitin-conjugating enzyme E2-25K) (Ubiquitin-protein ligase)	UBE2K HIP2 LIG			+									7
P98179	RBM3_HUMAN	RNA-binding protein 3 (RNA-binding motif protein 3) (RNPL)	RBM3 RNPL			+									7
Q9Y224	RTRAF_HUMAN	RNA transcription, translation and transport factor protein (CLE7 homolog, CLE, hCLE)	RTRAF C14orf166 CGI-99			+									7
Q14566	MCM6_HUMAN	DNA replication licensing factor MCM6, EC 3.6.4.12 (p105MCM)	MCM6			+									7
Q14103	HNRPD_HUMAN	Heterogeneous nuclear ribonucleoprotein D0, hnRNP D0 (AU-rich element RNA-binding protein 1)	HNRNPD AUF1 HNRPD			+									7
Q13232	NDK3_HUMAN	Nucleoside diphosphate kinase 3, NDK 3, NDP kinase 3, EC 2.7.4.6 (DR-nm23) (Nucleoside diphosphate kinase C, NDPKC) (nm23-H3)	NME3			+									6
P19623	SPEE_HUMAN	Spermidine synthase, SPDSY, EC 2.5.1.16 (Putrescine aminopropyltransferase)	SRM SPS1 SRML1			+									6
Q12888	TP53B_HUMAN	TP53-binding protein 1, 53BP1, p53-binding protein 1, p53BP1	TP53BP1			+									6
P05386	RLA1_HUMAN	60S acidic ribosomal protein P1 (Large ribosomal subunit protein P1)	RPLP1 RRP1			+									6
P42771	CDN2A_HUMAN	Cyclin-dependent kinase inhibitor 2A (Cyclin-dependent kinase 4 inhibitor A, CDK4I) (Multiple tumor suppressor 1, MTS-1) (p16-INK4a, p16-INK4, p16INK4A)	CDKN2A CDKN2 MTS1			+									6
Q01105	SET_HUMAN	Protein SET (HLA-DR-associated protein II) (Inhibitor of granzyme A-activated DNase, IGAAD) (PHAPII) (Phosphatase 2A inhibitor I2PP2A, I-2PP2A) (Template-activating factor I, TAF-I)	SET			+									6
Q9UHD1	CHRD1_HUMAN	Cysteine and histidine-rich domain-containing protein 1 (CHORD domain-containing protein 1, CHORD-containing protein 1, CHP-1) (Protein morgana)	CHORDC1 CHP1			+									6
O43837	IDH3B_HUMAN	Isocitrate dehydrogenase [NAD] subunit beta, mitochondrial (Isocitric dehydrogenase subunit beta) (NAD(+)-specific ICDH subunit beta)	IDH3B			+									6
O14929	HAT1_HUMAN	Histone acetyltransferase type B catalytic subunit, EC 2.3.1.48 (Histone acetyltransferase 1)	HAT1 KAT1			+									6
Q92804	RBP56_HUMAN	TATA-binding protein-associated factor 2N (68 kDa TATA-binding protein-associated factor, TAF(II)68, TAFII68) (RNA-binding protein 56)	TAF15 RBP56 TAF2N			+									6
P30048	PRDX3_HUMAN	Thioredoxin-dependent peroxide reductase, mitochondrial, EC 1.11.1.24 (Antioxidant protein 1, AOP-1) (HBC189) (Peroxiredoxin III, Prx-III) (Peroxiredoxin-3) (Protein MER5 homolog) (Thioredoxin-dependent peroxiredoxin 3)	PRDX3 AOP1			+									6
P40937	RFC5_HUMAN	Replication factor C subunit 5 (Activator 1 36 kDa subunit, A1 36 kDa subunit) (Activator 1 subunit 5) (Replication factor C 36 kDa subunit, RF-C 36 kDa subunit, RFC36)	RFC5			+									6
Q14137	BOP1_HUMAN	Ribosome biogenesis protein BOP1 (Block of proliferation 1 protein)	BOP1 KIAA0124			+									6
P55769	NH2L1_HUMAN	NHP2-like protein 1 (High mobility group-like nuclear protein 2 homolog 1) (OTK27) (SNU13 homolog, hSNU13) (U4/U6.U5 small nuclear ribonucleoprotein SNU13) (U4/U6.U5 tri-snRNP 15.5 kDa protein) [Cleaved into: NHP2-like protein 1, N-terminally processed ]	SNU13 NHP2L1			+									6
P40938	RFC3_HUMAN	Replication factor C subunit 3 (Activator 1 38 kDa subunit, A1 38 kDa subunit) (Activator 1 subunit 3) (Replication factor C 38 kDa subunit, RF-C 38 kDa subunit, RFC38)	RFC3			+									6
Q9UIJ7	KAD3_HUMAN	GTP:AMP phosphotransferase AK3, mitochondrial, EC 2.7.4.10 (Adenylate kinase 3, AK 3) (Adenylate kinase 3 alpha-like 1)	AK3 AK3L1 AK6 AKL3L			+									6
O75821	EIF3G_HUMAN	Eukaryotic translation initiation factor 3 subunit G, eIF3g (Eukaryotic translation initiation factor 3 RNA-binding subunit, eIF-3 RNA-binding subunit) (Eukaryotic translation initiation factor 3 subunit 4) (eIF-3-delta) (eIF3 p42) (eIF3 p44)	EIF3G EIF3S4			+									6
O76003	GLRX3_HUMAN	Glutaredoxin-3 (PKC-interacting cousin of thioredoxin, PICOT) (PKC-theta-interacting protein, PKCq-interacting protein) (Thioredoxin-like protein 2)	GLRX3 PICOT TXNL2 HUSSY-22			+									6
O75531	BAF_HUMAN	Barrier-to-autointegration factor (Breakpoint cluster region protein 1) [Cleaved into: Barrier-to-autointegration factor, N-terminally processed ]	BANF1 BAF BCRG1			+									6
Q5VT98	PRA20_HUMAN	PRAME family member 20	PRAMEF20 PRAMEF21			+									6
P23258	TBG1_HUMAN	Tubulin gamma-1 chain (Gamma-1-tubulin) (Gamma-tubulin complex component 1, GCP-1)	TUBG1 TUBG			+									5
Q9Y3F4	STRAP_HUMAN	Serine-threonine kinase receptor-associated protein (MAP activator with WD repeats) (UNR-interacting protein) (WD-40 repeat protein PT-WD)	STRAP MAWD UNRIP			+									5
Q96LJ7	DHRS1_HUMAN	Dehydrogenase/reductase SDR family member 1, EC 1.1.1.- (Short chain dehydrogenase/reductase family 19C member 1, Protein SDR19C1)	DHRS1 SDR19C1			+									5
P49736	MCM2_HUMAN	DNA replication licensing factor MCM2 (Minichromosome maintenance protein 2 homolog) (Nuclear protein BM28)	MCM2 BM28 CCNL1 CDCL1 KIAA0030			+									5
P30084	ECHM_HUMAN	Enoyl-CoA hydratase, mitochondrial, mECH, mECH1, EC 4.2.1.17, EC 5.3.3.8 (Enoyl-CoA hydratase 1, ECHS1) (Short-chain enoyl-CoA hydratase, SCEH)	ECHS1			+									5
P52943	CRIP2_HUMAN	Cysteine-rich protein 2, CRP-2 (Protein ESP1)	CRIP2 CRP2			+									5
Q9P0V9	SEP10_HUMAN	Septin-10	SEPTIN10 SEPT10			+									5
P38117	ETFB_HUMAN	Electron transfer flavoprotein subunit beta, Beta-ETF	ETFB FP585			+									5
Q04323	UBXN1_HUMAN	UBX domain-containing protein 1 (SAPK substrate protein 1) (UBA/UBX 33.3 kDa protein)	UBXN1 SAKS1			+									5
P43487	RANG_HUMAN	Ran-specific GTPase-activating protein (Ran-binding protein 1, RanBP1)	RANBP1			+									5
P15559	NQO1_HUMAN	NAD(P)H dehydrogenase [quinone] 1, EC 1.6.5.2 (Azoreductase) (DT-diaphorase, DTD) (Menadione reductase) (NAD(P)H:quinone oxidoreductase 1) (Phylloquinone reductase) (Quinone reductase 1, QR1)	NQO1 DIA4 NMOR1			+									5
Q96RP9	EFGM_HUMAN	Elongation factor G, mitochondrial, EF-Gmt (Elongation factor G 1, mitochondrial, mEF-G 1) (Elongation factor G1, hEFG1)	GFM1 EFG EFG1 GFM			+									5
Q9UIG0	BAZ1B_HUMAN	Tyrosine-protein kinase BAZ1B, EC 2.7.10.2 (Bromodomain adjacent to zinc finger domain protein 1B) (Williams syndrome transcription factor) (Williams-Beuren syndrome chromosomal region 10 protein) (Williams-Beuren syndrome chromosomal region 9 protein) (hWALp2)	BAZ1B WBSC10 WBSCR10 WBSCR9 WSTF			+									5
Q9UHB9	SRP68_HUMAN	Signal recognition particle subunit SRP68, SRP68 (Signal recognition particle 68 kDa protein)	SRP68			+									4
Q14683	SMC1A_HUMAN	Structural maintenance of chromosomes protein 1A, SMC protein 1A, SMC-1-alpha, SMC-1A (Sb1.8)	SMC1A DXS423E KIAA0178 SB1.8 SMC1 SMC1L1			+									4
Q13151	ROA0_HUMAN	Heterogeneous nuclear ribonucleoprotein A0, hnRNP A0	HNRNPA0 HNRPA0			+									4
P26368	U2AF2_HUMAN	Splicing factor U2AF 65 kDa subunit (U2 auxiliary factor 65 kDa subunit, hU2AF(65), hU2AF65) (U2 snRNP auxiliary factor large subunit)	U2AF2 U2AF65			+									4
Q9Y2Z4	SYYM_HUMAN	Tyrosine--tRNA ligase, mitochondrial, EC 6.1.1.1 (Tyrosyl-tRNA synthetase, TyrRS)	YARS2 CGI-04			+									4
P40261	NNMT_HUMAN	Nicotinamide N-methyltransferase, EC 2.1.1.1	NNMT			+									4
Q7L0Y3	TM10C_HUMAN	tRNA methyltransferase 10 homolog C (HBV pre-S2 trans-regulated protein 2) (Mitochondrial ribonuclease P protein 1, Mitochondrial RNase P protein 1) (RNA (guanine-9-)-methyltransferase domain-containing protein 1) (Renal carcinoma antigen NY-REN-49) (mRNA methyladenosine-N(1)-methyltransferase, EC 2.1.1.-) (tRNA (adenine(9)-N(1))-methyltransferase, EC 2.1.1.218) (tRNA (guanine(9)-N(1))-methyltran…	TRMT10C MRPP1 RG9MTD1			+									4
Q9UNS2	CSN3_HUMAN	COP9 signalosome complex subunit 3, SGN3, Signalosome subunit 3 (JAB1-containing signalosome subunit 3)	COPS3 CSN3			+									4
Q9BQ70	TCF25_HUMAN	Transcription factor 25, TCF-25 (Nuclear localized protein 1)	TCF25 KIAA1049 NULP1 FKSG26			+									4
Q66LE6	2ABD_HUMAN	Serine/threonine-protein phosphatase 2A 55 kDa regulatory subunit B delta isoform (PP2A subunit B isoform B55-delta) (PP2A subunit B isoform PR55-delta) (PP2A subunit B isoform R2-delta) (PP2A subunit B isoform delta)	PPP2R2D KIAA1541			+									4
Q6WCQ1	MPRIP_HUMAN	Myosin phosphatase Rho-interacting protein, M-RIP (Rho-interacting protein 3, RIP3) (p116Rip)	MPRIP KIAA0864 MRIP RHOIP3			+									4
P26640	SYVC_HUMAN	Valine--tRNA ligase, EC 6.1.1.9 (Protein G7a) (Valyl-tRNA synthetase, ValRS)	VARS1 G7A VARS VARS2			+									4
Q9UN86	G3BP2_HUMAN	Ras GTPase-activating protein-binding protein 2, G3BP-2 (GAP SH3 domain-binding protein 2)	G3BP2 KIAA0660			+									4
Q5HYI7	MTX3_HUMAN	Metaxin-3	MTX3			+									4
Q8WVJ2	NUDC2_HUMAN	NudC domain-containing protein 2	NUDCD2			+									4
Q15459	SF3A1_HUMAN	Splicing factor 3A subunit 1 (SF3a120) (Spliceosome-associated protein 114, SAP 114)	SF3A1 SAP114			+									3
Q969Z0	FAKD4_HUMAN	FAST kinase domain-containing protein 4 (Cell cycle progression restoration protein 2, Cell cycle progression protein 2) (Protein TBRG4) (Transforming growth factor beta regulator 4)	TBRG4 CPR2 FASTKD4 KIAA0948			+									3
Q9Y5B9	SP16H_HUMAN	FACT complex subunit SPT16 (Chromatin-specific transcription elongation factor 140 kDa subunit) (FACT 140 kDa subunit) (FACTp140) (Facilitates chromatin transcription complex subunit SPT16, hSPT16)	SUPT16H FACT140 FACTP140			+									3
P68036	UB2L3_HUMAN	Ubiquitin-conjugating enzyme E2 L3, EC 2.3.2.23 (E2 ubiquitin-conjugating enzyme L3) (L-UBC) (UbcH7) (Ubiquitin carrier protein L3) (Ubiquitin-conjugating enzyme E2-F1) (Ubiquitin-protein ligase L3)	UBE2L3 UBCE7 UBCH7			+									3
P48507	GSH0_HUMAN	Glutamate--cysteine ligase regulatory subunit (GCS light chain) (Gamma-ECS regulatory subunit) (Gamma-glutamylcysteine synthetase regulatory subunit) (Glutamate--cysteine ligase modifier subunit)	GCLM GLCLR			+									3
Q13526	PIN1_HUMAN	Peptidyl-prolyl cis-trans isomerase NIMA-interacting 1, EC 5.2.1.8 (Peptidyl-prolyl cis-trans isomerase Pin1, PPIase Pin1) (Rotamase Pin1)	PIN1			+									3
Q96DZ1	ERLEC_HUMAN	Endoplasmic reticulum lectin 1 (ER lectin, Erlectin) (XTP3-transactivated gene B protein)	ERLEC1 C2orf30 XTP3TPB UNQ1878/PRO4321			+									3
Q6DKI1	RL7L_HUMAN	60S ribosomal protein L7-like 1 (Large ribosomal subunit protein uL30-like 1)	RPL7L1			+									3
P31153	METK2_HUMAN	S-adenosylmethionine synthase isoform type-2, AdoMet synthase 2, EC 2.5.1.6 (Methionine adenosyltransferase 2, MAT 2) (Methionine adenosyltransferase II, MAT-II)	MAT2A AMS2 MATA2			+									3
Q9NRX1	PNO1_HUMAN	RNA-binding protein PNO1 (Partner of NOB1)	PNO1			+									3
P51668	UB2D1_HUMAN	Ubiquitin-conjugating enzyme E2 D1, EC 2.3.2.23 ((E3-independent) E2 ubiquitin-conjugating enzyme D1, EC 2.3.2.24) (E2 ubiquitin-conjugating enzyme D1) (Stimulator of Fe transport, SFT) (UBC4/5 homolog) (UbcH5) (Ubiquitin carrier protein D1) (Ubiquitin-conjugating enzyme E2(17)KB 1) (Ubiquitin-conjugating enzyme E2-17 kDa 1) (Ubiquitin-protein ligase D1)	UBE2D1 SFT UBC5A UBCH5 UBCH5A			+									3
Q8WWF6	DNJB3_HUMAN	DnaJ homolog subfamily B member 3	DNAJB3 HCG3			+									3
P53597	SUCA_HUMAN	Succinate--CoA ligase [ADP/GDP-forming] subunit alpha, mitochondrial, EC 6.2.1.4, EC 6.2.1.5 (Succinyl-CoA synthetase subunit alpha, SCS-alpha)	SUCLG1			+									3
Q9NWS8	RMND1_HUMAN	Required for meiotic nuclear division protein 1 homolog	RMND1 C6orf96			+									3
P31948	STIP1_HUMAN	Stress-induced-phosphoprotein 1, STI1 (Hsc70/Hsp90-organizing protein, Hop) (Renal carcinoma antigen NY-REN-11) (Transformation-sensitive protein IEF SSP 3521)	STIP1			+									3
P35244	RFA3_HUMAN	Replication protein A 14 kDa subunit, RP-A p14 (Replication factor A protein 3, RF-A protein 3)	RPA3 REPA3 RPA14			+									3
P27694	RFA1_HUMAN	Replication protein A 70 kDa DNA-binding subunit, RP-A p70 (Replication factor A protein 1, RF-A protein 1) (Single-stranded DNA-binding protein) [Cleaved into: Replication protein A 70 kDa DNA-binding subunit, N-terminally processed ]	RPA1 REPA1 RPA70			+									3
O75717	WDHD1_HUMAN	WD repeat and HMG-box DNA-binding protein 1 (Acidic nucleoplasmic DNA-binding protein 1, And-1)	WDHD1 AND1			+									3
Q8TDN6	BRX1_HUMAN	Ribosome biogenesis protein BRX1 homolog (Brix domain-containing protein 2)	BRIX1 BRIX BXDC2			+									3
Q13098	CSN1_HUMAN	COP9 signalosome complex subunit 1, SGN1, Signalosome subunit 1 (G protein pathway suppressor 1, GPS-1) (JAB1-containing signalosome subunit 1) (Protein MFH)	GPS1 COPS1 CSN1			+									3
Q9NYH9	UTP6_HUMAN	U3 small nucleolar RNA-associated protein 6 homolog (Hepatocellular carcinoma-associated antigen 66) (Multiple hat domains protein)	UTP6 C17orf40 HCA66 MHAT			+									3
P23919	KTHY_HUMAN	Thymidylate kinase, EC 2.7.4.9 (dTMP kinase)	DTYMK CDC8 TMPK TYMK			+									3
P62318	SMD3_HUMAN	Small nuclear ribonucleoprotein Sm D3, Sm-D3 (snRNP core protein D3)	SNRPD3			+									3
P27816	MAP4_HUMAN	Microtubule-associated protein 4, MAP-4	MAP4			+									3
Q9NYL9	TMOD3_HUMAN	Tropomodulin-3 (Ubiquitous tropomodulin, U-Tmod)	TMOD3			+									3
Q12849	GRSF1_HUMAN	G-rich sequence factor 1, GRSF-1	GRSF1			+									3
Q6EEV6	SUMO4_HUMAN	Small ubiquitin-related modifier 4, SUMO-4 (Small ubiquitin-like protein 4)	SUMO4 SMT3H4			+									3
P49915	GUAA_HUMAN	GMP synthase [glutamine-hydrolyzing], EC 6.3.5.2 (GMP synthetase) (Glutamine amidotransferase)	GMPS			+									3
Q9HCN4	GPN1_HUMAN	GPN-loop GTPase 1, EC 3.6.5.- (MBD2-interacting protein, MBDin) (RNAPII-associated protein 4) (XPA-binding protein 1)	GPN1 MBDIN RPAP4 XAB1 HUSSY-23			+									3
Q9BV68	RN126_HUMAN	E3 ubiquitin-protein ligase RNF126, EC 2.3.2.27 (RING finger protein 126)	RNF126			+									3
Q9Y5K5	UCHL5_HUMAN	Ubiquitin carboxyl-terminal hydrolase isozyme L5, UCH-L5, EC 3.4.19.12 (Ubiquitin C-terminal hydrolase UCH37) (Ubiquitin thioesterase L5)	UCHL5 UCH37 AD-019 CGI-70			+									3
Q8N726	ARF_HUMAN	Tumor suppressor ARF (Alternative reading frame, ARF) (Cyclin-dependent kinase inhibitor 2A) (p14ARF)	CDKN2A CDKN2 MLM			+									3
Q9Y570	PPME1_HUMAN	Protein phosphatase methylesterase 1, PME-1, EC 3.1.1.89	PPME1 PME1 PP2593 PRO0750			+									3
Q96KR1	ZFR_HUMAN	Zinc finger RNA-binding protein, hZFR (M-phase phosphoprotein homolog)	ZFR			+									3
P62877	RBX1_HUMAN	E3 ubiquitin-protein ligase RBX1, EC 2.3.2.27, EC 2.3.2.32 (E3 ubiquitin-protein transferase RBX1) (Protein ZYP) (RING finger protein 75) (RING-box protein 1, Rbx1) (Regulator of cullins 1, ROC1) [Cleaved into: E3 ubiquitin-protein ligase RBX1, N-terminally processed (E3 ubiquitin-protein transferase RBX1, N-terminally processed) ]	RBX1 RNF75 ROC1			+									3
Q15434	RBMS2_HUMAN	RNA-binding motif, single-stranded-interacting protein 2 (Suppressor of CDC2 with RNA-binding motif 3)	RBMS2 SCR3			+									3
P49458	SRP09_HUMAN	Signal recognition particle 9 kDa protein, SRP9	SRP9			+									3
Q8NAB2	KBTB3_HUMAN	Kelch repeat and BTB domain-containing protein 3 (BTB and kelch domain-containing protein 3)	KBTBD3 BKLHD3			+									3
Q494V2	CP100_HUMAN	Cilia- and flagella-associated protein 100 (Coiled-coil domain-containing protein 37)	CFAP100 CCDC37			+									3
Q53H47	SETMR_HUMAN	Histone-lysine N-methyltransferase SETMAR (SET domain and mariner transposase fusion protein, Metnase) [Includes: Histone-lysine N-methyltransferase, EC 2.1.1.357; Transposon Hsmar1 transposase, EC 3.1.-.- ]	SETMAR			+									3
Q7Z6K3	PTAR1_HUMAN	Protein prenyltransferase alpha subunit repeat-containing protein 1	PTAR1			+									3
Q3MJ13	WDR72_HUMAN	WD repeat-containing protein 72	WDR72			+									3
Q9GZL7	WDR12_HUMAN	Ribosome biogenesis protein WDR12 (WD repeat-containing protein 12)	WDR12			+									2
Q14157	UBP2L_HUMAN	Ubiquitin-associated protein 2-like (Protein NICE-4)	UBAP2L KIAA0144 NICE4			+									2
P08559	ODPA_HUMAN	Pyruvate dehydrogenase E1 component subunit alpha, somatic form, mitochondrial, EC 1.2.4.1 (PDHE1-A type I)	PDHA1 PHE1A			+									2
Q7L2H7	EIF3M_HUMAN	Eukaryotic translation initiation factor 3 subunit M, eIF3m (Fetal lung protein B5, hFL-B5) (PCI domain-containing protein 1)	EIF3M HFLB5 PCID1 GA17 PNAS-125			+									2
Q16836	HCDH_HUMAN	Hydroxyacyl-coenzyme A dehydrogenase, mitochondrial, HCDH, EC 1.1.1.35 (Medium and short-chain L-3-hydroxyacyl-coenzyme A dehydrogenase) (Short-chain 3-hydroxyacyl-CoA dehydrogenase)	HADH HAD HAD1 HADHSC SCHAD			+									2
Q9BUJ2	HNRL1_HUMAN	Heterogeneous nuclear ribonucleoprotein U-like protein 1 (Adenovirus early region 1B-associated protein 5) (E1B-55 kDa-associated protein 5, E1B-AP5)	HNRNPUL1 E1BAP5 HNRPUL1			+									2
P20290	BTF3_HUMAN	Transcription factor BTF3 (Nascent polypeptide-associated complex subunit beta, NAC-beta) (RNA polymerase B transcription factor 3)	BTF3 NACB OK/SW-cl.8			+									2
O00411	RPOM_HUMAN	DNA-directed RNA polymerase, mitochondrial, MtRPOL, EC 2.7.7.6	POLRMT			+									2
P46087	NOP2_HUMAN	Probable 28S rRNA (cytosine(4447)-C(5))-methyltransferase, EC 2.1.1.- (Nucleolar protein 1) (Nucleolar protein 2 homolog) (Proliferating-cell nucleolar antigen p120) (Proliferation-associated nucleolar protein p120)	NOP2 NOL1 NSUN1			+									2
Q9Y2D5	AKAP2_HUMAN	A-kinase anchor protein 2, AKAP-2 (AKAP-KL) (Protein kinase A-anchoring protein 2, PRKA2)	AKAP2 KIAA0920 PRKA2			+									2
P41567	EIF1_HUMAN	Eukaryotic translation initiation factor 1, eIF1 (A121) (Protein translation factor SUI1 homolog) (Sui1iso1)	EIF1 SUI1			+									2
Q08945	SSRP1_HUMAN	FACT complex subunit SSRP1 (Chromatin-specific transcription elongation factor 80 kDa subunit) (Facilitates chromatin transcription complex 80 kDa subunit, FACT 80 kDa subunit, FACTp80) (Facilitates chromatin transcription complex subunit SSRP1) (Recombination signal sequence recognition protein 1) (Structure-specific recognition protein 1, hSSRP1) (T160)	SSRP1 FACT80			+									2
Q8N163	CCAR2_HUMAN	Cell cycle and apoptosis regulator protein 2 (Cell division cycle and apoptosis regulator protein 2) (DBIRD complex subunit KIAA1967) (Deleted in breast cancer gene 1 protein, DBC-1, DBC.1) (NET35) (p30 DBC)	CCAR2 DBC1 KIAA1967			+									2
Q9H074	PAIP1_HUMAN	Polyadenylate-binding protein-interacting protein 1, PABP-interacting protein 1, PAIP-1, Poly(A)-binding protein-interacting protein 1	PAIP1			+									2
Q96BN8	OTUL_HUMAN	Ubiquitin thioesterase otulin, EC 3.4.19.12 (Deubiquitinating enzyme otulin) (OTU domain-containing deubiquitinase with linear linkage specificity) (Ubiquitin thioesterase Gumby)	OTULIN FAM105B			+									2
O15042	SR140_HUMAN	U2 snRNP-associated SURP motif-containing protein (140 kDa Ser/Arg-rich domain protein) (U2-associated protein SR140)	U2SURP KIAA0332 SR140			+									2
O43684	BUB3_HUMAN	Mitotic checkpoint protein BUB3	BUB3			+									2
Q9BXW7	HDHD5_HUMAN	Haloacid dehalogenase-like hydrolase domain-containing 5 (Cat eye syndrome critical region protein 5)	HDHD5 CECR5			+									2
Q12788	TBL3_HUMAN	Transducin beta-like protein 3 (WD repeat-containing protein SAZD)	TBL3 SAZD			+									2
O15160	RPAC1_HUMAN	DNA-directed RNA polymerases I and III subunit RPAC1, DNA-directed RNA polymerase I subunit C, RNA polymerases I and III subunit AC1 (AC40) (DNA-directed RNA polymerases I and III 40 kDa polypeptide, RPA40) (RPA39) (RPC40)	POLR1C POLR1E			+									2
Q14139	UBE4A_HUMAN	Ubiquitin conjugation factor E4 A, EC 2.3.2.27 (RING-type E3 ubiquitin transferase E4 A)	UBE4A KIAA0126			+									2
Q63ZY3	KANK2_HUMAN	KN motif and ankyrin repeat domain-containing protein 2 (Ankyrin repeat domain-containing protein 25) (Matrix-remodeling-associated protein 3) (SRC-1-interacting protein, SIP, SRC-interacting protein, SRC1-interacting protein)	KANK2 ANKRD25 KIAA1518 MXRA3 SIP			+									2
P46100	ATRX_HUMAN	Transcriptional regulator ATRX, EC 3.6.4.12 (ATP-dependent helicase ATRX) (X-linked helicase II) (X-linked nuclear protein, XNP) (Znf-HX)	ATRX RAD54L XH2			+									2
Q9Y5A9	YTHD2_HUMAN	YTH domain-containing family protein 2, DF2 (CLL-associated antigen KW-14) (High-glucose-regulated protein 8) (Renal carcinoma antigen NY-REN-2)	YTHDF2 HGRG8			+									2
O43252	PAPS1_HUMAN	Bifunctional 3'-phosphoadenosine 5'-phosphosulfate synthase 1, PAPS synthase 1, PAPSS 1 (Sulfurylase kinase 1, SK 1, SK1) [Includes: Sulfate adenylyltransferase, EC 2.7.7.4 (ATP-sulfurylase) (Sulfate adenylate transferase, SAT); Adenylyl-sulfate kinase, EC 2.7.1.25 (3'-phosphoadenosine-5'-phosphosulfate synthase) (APS kinase) (Adenosine-5'-phosphosulfate 3'-phosphotransferase) (Adenylylsulfate 3'…	PAPSS1 ATPSK1 PAPSS			+									2
Q9UQ88	CD11A_HUMAN	Cyclin-dependent kinase 11A, EC 2.7.11.22 (Cell division cycle 2-like protein kinase 2) (Cell division protein kinase 11A) (Galactosyltransferase-associated protein kinase p58/GTA) (PITSLRE serine/threonine-protein kinase CDC2L2)	CDK11A CDC2L2 CDC2L3 PITSLREB			+									2
Q13547	HDAC1_HUMAN	Histone deacetylase 1, HD1, EC 3.5.1.98 (Protein deacetylase HDAC1, EC 3.5.1.-) (Protein decrotonylase HDAC1, EC 3.5.1.-)	HDAC1 RPD3L1			+									2
P55327	TPD52_HUMAN	Tumor protein D52 (Protein N8)	TPD52			+									2
Q8WX92	NELFB_HUMAN	Negative elongation factor B, NELF-B (Cofactor of BRCA1)	NELFB COBRA1 KIAA1182			+									2
Q9NQ29	LUC7L_HUMAN	Putative RNA-binding protein Luc7-like 1 (Putative SR protein LUC7B1) (SR+89)	LUC7L LUC7L1			+									2
Q01085	TIAR_HUMAN	Nucleolysin TIAR (TIA-1-related protein)	TIAL1			+									2
Q14166	TTL12_HUMAN	Tubulin--tyrosine ligase-like protein 12 (Inactive tubulin--tyrosine ligase-like protein 12)	TTLL12 KIAA0153			+									2
Q9NZQ9	TMOD4_HUMAN	Tropomodulin-4 (Skeletal muscle tropomodulin, Sk-Tmod)	TMOD4			+									2
O94888	UBXN7_HUMAN	UBX domain-containing protein 7	UBXN7 KIAA0794 UBXD7			+									2
Q9H6K4	OPA3_HUMAN	Optic atrophy 3 protein	OPA3			+									2
Q86YV5	PRAG1_HUMAN	Inactive tyrosine-protein kinase PRAG1 (PEAK1-related kinase-activating pseudokinase 1) (Pragmin) (Sugen kinase 223, SgK223)	PRAG1 SGK223			+									2
Q8IYM0	F186B_HUMAN	Protein FAM186B	FAM186B C12orf25			+									2
Q969S9	RRF2M_HUMAN	Ribosome-releasing factor 2, mitochondrial, RRF2mt (Elongation factor G 2, mitochondrial, EF-G2mt, mEF-G 2) (Elongation factor G2, hEFG2)	GFM2 EFG2 MSTP027			+									2
P61201	CSN2_HUMAN	COP9 signalosome complex subunit 2, SGN2, Signalosome subunit 2 (Alien homolog) (JAB1-containing signalosome subunit 2) (Thyroid receptor-interacting protein 15, TR-interacting protein 15, TRIP-15)	COPS2 CSN2 TRIP15			+									2
P14678	RSMB_HUMAN	Small nuclear ribonucleoprotein-associated proteins B and B', snRNP-B (Sm protein B/B', Sm-B/B', SmB/B')	SNRPB COD SNRPB1			+									2
Q6UXB0	F131A_HUMAN	Protein FAM131A	FAM131A C3orf40 UNQ715/PRO1378			+									2
O95163	ELP1_HUMAN	Elongator complex protein 1, ELP1 (IkappaB kinase complex-associated protein, IKK complex-associated protein) (p150)	ELP1 IKAP IKBKAP			+									2
Q96MX6	DAA10_HUMAN	Dynein axonemal assembly factor 10 (WD repeat-containing protein 92) (WD repeat-containing protein Monad)	DNAAF10 WDR92			+									2
P61326	MGN_HUMAN	Protein mago nashi homolog	MAGOH MAGOHA			+									2
Q9C030	TRIM6_HUMAN	Tripartite motif-containing protein 6, EC 2.3.2.27 (RING finger protein 89) (RING-type E3 ubiquitin transferase TRIM6)	TRIM6 RNF89			+									2
Q9Y3D2	MSRB2_HUMAN	Methionine-R-sulfoxide reductase B2, mitochondrial, MsrB2, EC 1.8.4.12, EC 1.8.4.14	MSRB2 CBS-1 MSRB CGI-131			+									2
Q16600	ZN239_HUMAN	Zinc finger protein 239 (Zinc finger protein HOK-2) (Zinc finger protein MOK-2)	ZNF239 HOK2 MOK2			+									2
O94762	RECQ5_HUMAN	ATP-dependent DNA helicase Q5, EC 3.6.4.12 (DNA helicase, RecQ-like type 5, RecQ5) (RecQ protein-like 5)	RECQL5 RECQ5			+									2
Q5VU43	MYOME_HUMAN	Myomegalin (Cardiomyopathy-associated protein 2) (Phosphodiesterase 4D-interacting protein)	PDE4DIP CMYA2 KIAA0454 KIAA0477 MMGL			+									2
Q8IY67	RAVR1_HUMAN	Ribonucleoprotein PTB-binding 1 (Protein raver-1)	RAVER1 KIAA1978			+									1
Q96AE4	FUBP1_HUMAN	Far upstream element-binding protein 1, FBP, FUSE-binding protein 1 (DNA helicase V, hDH V)	FUBP1			+									1
Q9H6V9	LDAH_HUMAN	Lipid droplet-associated hydrolase, EC 3.1.1.- (Lipid droplet-associated serine hydrolase, hLDAH)	LDAH C2orf43			+									1
Q15418	KS6A1_HUMAN	Ribosomal protein S6 kinase alpha-1, S6K-alpha-1, EC 2.7.11.1 (90 kDa ribosomal protein S6 kinase 1, p90-RSK 1, p90RSK1, p90S6K) (MAP kinase-activated protein kinase 1a, MAPK-activated protein kinase 1a, MAPKAP kinase 1a, MAPKAPK-1a) (Ribosomal S6 kinase 1, RSK-1)	RPS6KA1 MAPKAPK1A RSK1			+									1
Q9BV86	NTM1A_HUMAN	N-terminal Xaa-Pro-Lys N-methyltransferase 1, EC 2.1.1.244 (Alpha N-terminal protein methyltransferase 1A) (Methyltransferase-like protein 11A) (N-terminal RCC1 methyltransferase) (X-Pro-Lys N-terminal protein methyltransferase 1A, NTM1A) [Cleaved into: N-terminal Xaa-Pro-Lys N-methyltransferase 1, N-terminally processed ]	NTMT1 C9orf32 METTL11A NRMT NRMT1 AD-003			+									1
Q6ICB0	DESI1_HUMAN	Desumoylating isopeptidase 1, DeSI-1, EC 3.4.-.- (PPPDE peptidase domain-containing protein 2) (Polyubiquitinated substrate transporter, POST)	DESI1 FAM152B PPPDE2			+									1
P80297	MT1X_HUMAN	Metallothionein-1X, MT-1X (Metallothionein-IX, MT-IX)	MT1X			+									1
Q16822	PCKGM_HUMAN	Phosphoenolpyruvate carboxykinase [GTP], mitochondrial, PEPCK-M, EC 4.1.1.32	PCK2 PEPCK2			+									1
Q15293	RCN1_HUMAN	Reticulocalbin-1	RCN1 RCN			+									1
Q9Y2P8	RCL1_HUMAN	RNA 3'-terminal phosphate cyclase-like protein	RCL1 RNAC RPC2 RPCL1 RTC2 HSPC338			+									1
P52434	RPAB3_HUMAN	DNA-directed RNA polymerases I, II, and III subunit RPABC3, RNA polymerases I, II, and III subunit ABC3 (DNA-directed RNA polymerase II subunit H) (DNA-directed RNA polymerases I, II, and III 17.1 kDa polypeptide) (RPB17) (RPB8 homolog, hRPB8)	POLR2H			+									1
Q9Y3T9	NOC2L_HUMAN	Nucleolar complex protein 2 homolog, Protein NOC2 homolog (NOC2-like protein) (Novel INHAT repressor)	NOC2L NIR			+									1
Q9H6R4	NOL6_HUMAN	Nucleolar protein 6 (Nucleolar RNA-associated protein, Nrap)	NOL6			+									1
Q9BQ69	MACD1_HUMAN	ADP-ribose glycohydrolase MACROD1 (MACRO domain-containing protein 1) (O-acetyl-ADP-ribose deacetylase MACROD1, EC 3.1.1.106) (Protein LRP16) ([Protein ADP-ribosylaspartate] hydrolase MACROD1, EC 3.2.2.-) ([Protein ADP-ribosylglutamate] hydrolase MACROD1, EC 3.2.2.-)	MACROD1 LRP16			+									1
Q9ULX6	AKP8L_HUMAN	A-kinase anchor protein 8-like, AKAP8-like protein (Helicase A-binding protein 95, HAP95) (Homologous to AKAP95 protein, HA95) (Neighbor of A-kinase-anchoring protein 95, Neighbor of AKAP95)	AKAP8L NAKAP NAKAP95 HRIHFB2018			+									1
Q6UUV7	CRTC3_HUMAN	CREB-regulated transcription coactivator 3 (Transducer of regulated cAMP response element-binding protein 3, TORC-3, Transducer of CREB protein 3)	CRTC3 TORC3			+									1
O95232	LC7L3_HUMAN	Luc7-like protein 3 (Cisplatin resistance-associated-overexpressed protein) (Luc7A) (Okadaic acid-inducible phosphoprotein OA48-18) (cAMP regulatory element-associated protein 1, CRE-associated protein 1, CREAP-1)	LUC7L3 CREAP1 CROP O48			+									1
A0A0U1RRL7	MMPOS_HUMAN	Protein MMP24OS (MMP24 opposite strand)	MMP24OS MMP24-AS1			+									1
Q14684	RRP1B_HUMAN	Ribosomal RNA processing protein 1 homolog B (RRP1-like protein B)	RRP1B KIAA0179			+									1
Q15631	TSN_HUMAN	Translin, EC 3.1.-.- (Component 3 of promoter of RISC, C3PO)	TSN			+									1
Q9UJX3	APC7_HUMAN	Anaphase-promoting complex subunit 7, APC7 (Cyclosome subunit 7)	ANAPC7 APC7			+									1
Q9NRG7	D39U1_HUMAN	Epimerase family protein SDR39U1, EC 1.1.1.- (Short-chain dehydrogenase/reductase family 39U member 1)	SDR39U1 C14orf124 HCDI			+									1
Q9UQ35	SRRM2_HUMAN	Serine/arginine repetitive matrix protein 2 (300 kDa nuclear matrix antigen) (Serine/arginine-rich splicing factor-related nuclear matrix protein of 300 kDa, SR-related nuclear matrix protein of 300 kDa, Ser/Arg-related nuclear matrix protein of 300 kDa) (Splicing coactivator subunit SRm300) (Tax-responsive enhancer element-binding protein 803, TaxREB803)	SRRM2 KIAA0324 SRL300 SRM300 HSPC075			+									1
Q9UNN5	FAF1_HUMAN	FAS-associated factor 1, hFAF1 (UBX domain-containing protein 12) (UBX domain-containing protein 3A)	FAF1 UBXD12 UBXN3A CGI-03			+									1
Q96IR7	HPDL_HUMAN	4-hydroxyphenylpyruvate dioxygenase-like protein, HPD-like protein, EC 1.13.-.- (Glyoxalase domain-containing protein 1)	HPDL GLOXD1			+									1
Q8IVS2	FABD_HUMAN	Malonyl-CoA-acyl carrier protein transacylase, mitochondrial, MCT, EC 2.3.1.39 (Mitochondrial malonyl CoA:ACP acyltransferase) (Mitochondrial malonyltransferase) ([Acyl-carrier-protein] malonyltransferase)	MCAT MT			+									1
Q9NVZ3	NECP2_HUMAN	Adaptin ear-binding coat-associated protein 2 (NECAP endocytosis-associated protein 2, NECAP-2)	NECAP2			+									1
P11182	ODB2_HUMAN	Lipoamide acyltransferase component of branched-chain alpha-keto acid dehydrogenase complex, mitochondrial, EC 2.3.1.168 (52 kDa mitochondrial autoantigen of primary biliary cirrhosis) (Branched chain 2-oxo-acid dehydrogenase complex component E2, BCOADC-E2) (Branched-chain alpha-keto acid dehydrogenase complex component E2, BCKAD-E2, BCKADE2) (Dihydrolipoamide acetyltransferase component of bran…	DBT BCATE2			+									1
Q14011	CIRBP_HUMAN	Cold-inducible RNA-binding protein (A18 hnRNP) (Glycine-rich RNA-binding protein CIRP)	CIRBP A18HNRNP CIRP			+									1
Q5T7N3	KANK4_HUMAN	KN motif and ankyrin repeat domain-containing protein 4 (Ankyrin repeat domain-containing protein 38)	KANK4 ANKRD38			+									1
O95757	HS74L_HUMAN	Heat shock 70 kDa protein 4L (Heat shock 70-related protein APG-1) (Heat-shock protein family A member 4-like protein, HSPA4-like protein) (Osmotic stress protein 94)	HSPA4L APG1 OSP94			+									1
Q15637	SF01_HUMAN	Splicing factor 1 (Mammalian branch point-binding protein, BBP, mBBP) (Transcription factor ZFM1) (Zinc finger gene in MEN1 locus) (Zinc finger protein 162)	SF1 ZFM1 ZNF162			+									1
P48681	NEST_HUMAN	Nestin	NES Nbla00170			+									1
O75506	HSBP1_HUMAN	Heat shock factor-binding protein 1 (Nasopharyngeal carcinoma-associated antigen 13, NPC-A-13)	HSBP1 HSF1BP			+									1
D6RBQ6	U17LH_HUMAN	Ubiquitin carboxyl-terminal hydrolase 17-like protein 17, EC 3.4.19.12	USP17L17			+									1
Q9UPN7	PP6R1_HUMAN	Serine/threonine-protein phosphatase 6 regulatory subunit 1 (SAPS domain family member 1)	PPP6R1 KIAA1115 PP6R1 SAPS1			+									1
Q7Z7K0	COXM1_HUMAN	COX assembly mitochondrial protein homolog, Cmc1p	CMC1 C3orf68			+									1
P49750	YLPM1_HUMAN	YLP motif-containing protein 1 (Nuclear protein ZAP3) (ZAP113)	YLPM1 C14orf170 ZAP3			+									1
A6NFN3	RFOX3_HUMAN	RNA binding protein fox-1 homolog 3 (Fox-1 homolog C) (Neuronal nuclei antigen, NeuN antigen)	RBFOX3			+									1
Q9BZJ0	CRNL1_HUMAN	Crooked neck-like protein 1 (Crooked neck homolog, hCrn)	CRNKL1 CRN CGI-201 MSTP021			+									1
Q5JPH6	SYEM_HUMAN	Probable glutamate--tRNA ligase, mitochondrial, EC 6.1.1.17 (Glutamyl-tRNA synthetase, GluRS)	EARS2 KIAA1970			+									1
P33240	CSTF2_HUMAN	Cleavage stimulation factor subunit 2 (CF-1 64 kDa subunit) (Cleavage stimulation factor 64 kDa subunit, CSTF 64 kDa subunit, CstF-64)	CSTF2			+									1
Q96LR5	UB2E2_HUMAN	Ubiquitin-conjugating enzyme E2 E2, EC 2.3.2.23 (E2 ubiquitin-conjugating enzyme E2) (UbcH8) (Ubiquitin carrier protein E2) (Ubiquitin-protein ligase E2)	UBE2E2 UBCH8			+									1
Q8IVL6	P3H3_HUMAN	Prolyl 3-hydroxylase 3, EC 1.14.11.7 (Leprecan-like protein 2) (Protein B)	P3H3 LEPREL2			+									1
Q6R327	RICTR_HUMAN	Rapamycin-insensitive companion of mTOR (AVO3 homolog, hAVO3)	RICTOR KIAA1999			+									1
Q8IYW2	CFA46_HUMAN	Cilia- and flagella-associated protein 46 (Tetratricopeptide repeat protein 40)	CFAP46 C10orf123 C10orf124 C10orf92 C10orf93 TTC40			+									1
P62875	RPAB5_HUMAN	DNA-directed RNA polymerases I, II, and III subunit RPABC5, RNA polymerases I, II, and III subunit ABC5 (DNA-directed RNA polymerase III subunit L) (RNA polymerase II 7.6 kDa subunit, RPB7.6) (RPB10 homolog)	POLR2L			+									1
Q6ZR08	DYH12_HUMAN	Dynein axonemal heavy chain 12 (Axonemal beta dynein heavy chain 12) (Axonemal dynein heavy chain 12-like protein) (Axonemal dynein heavy chain 7-like protein) (Ciliary dynein heavy chain 12) (Dynein axonemal heavy chain 7-like) (Dynein heavy chain domain-containing protein 2)	DNAH12 DHC3 DLP12 DNAH12L DNAH7L DNAHC3 DNHD2 HDHC3 HL19			+									1
Q9H8M2	BRD9_HUMAN	Bromodomain-containing protein 9 (Rhabdomyosarcoma antigen MU-RMS-40.8)	BRD9 UNQ3040/PRO9856			+									1
Q9NXF1	TEX10_HUMAN	Testis-expressed protein 10	TEX10 L18 Nbla10363			+									1
Q92576	PHF3_HUMAN	PHD finger protein 3	PHF3 KIAA0244			+									1
Q96PF2	TSSK2_HUMAN	Testis-specific serine/threonine-protein kinase 2, TSK-2, TSK2, TSSK-2, Testis-specific kinase 2, EC 2.7.11.1 (DiGeorge syndrome protein G, DGS-G) (Serine/threonine-protein kinase 22B)	TSSK2 DGSG SPOGA2 STK22B			+									1
A0A0J9YXQ4	PMA6E_HUMAN	Paraneoplastic antigen Ma6E	PNMA6E			+									1
O95394	AGM1_HUMAN	Phosphoacetylglucosamine mutase, PAGM, EC 5.4.2.3 (Acetylglucosamine phosphomutase) (N-acetylglucosamine-phosphate mutase) (Phosphoglucomutase-3, PGM 3)	PGM3 AGM1			+									1
Q9BV20	MTNA_HUMAN	Methylthioribose-1-phosphate isomerase, M1Pi, MTR-1-P isomerase, EC 5.3.1.23 (Mediator of RhoA-dependent invasion) (S-methyl-5-thioribose-1-phosphate isomerase) (Translation initiation factor eIF-2B subunit alpha/beta/delta-like protein)	MRI1 MRDI UNQ6390/PRO21135			+									1
Q5TCY1	TTBK1_HUMAN	Tau-tubulin kinase 1, EC 2.7.11.1 (Brain-derived tau kinase)	TTBK1 BDTK KIAA1855			+									1
Q9UJY1	HSPB8_HUMAN	Heat shock protein beta-8, HspB8 (Alpha-crystallin C chain) (E2-induced gene 1 protein) (Protein kinase H11) (Small stress protein-like protein HSP22)	HSPB8 CRYAC E2IG1 HSP22 PP1629			+									1
Q8N9V6	ANR53_HUMAN	Ankyrin repeat domain-containing protein 53	ANKRD53			+									1
Q56NI9	ESCO2_HUMAN	N-acetyltransferase ESCO2, EC 2.3.1.- (Establishment factor-like protein 2, EFO2, EFO2p, hEFO2) (Establishment of cohesion 1 homolog 2, ECO1 homolog 2)	ESCO2			+									1
Q16698	DECR_HUMAN	2,4-dienoyl-CoA reductase [(3E)-enoyl-CoA-producing], mitochondrial, EC 1.3.1.124 (2,4-dienoyl-CoA reductase [NADPH], 4-enoyl-CoA reductase [NADPH]) (Short chain dehydrogenase/reductase family 18C member 1)	DECR1 DECR SDR18C1			+									1
Q9BXP5	SRRT_HUMAN	Serrate RNA effector molecule homolog (Arsenite-resistance protein 2)	SRRT ARS2 ASR2			+									1
P35520	CBS_HUMAN	Cystathionine beta-synthase, EC 4.2.1.22 (Beta-thionase) (Serine sulfhydrase)	CBS			+									1
Q8NDW8	TT21A_HUMAN	Tetratricopeptide repeat protein 21A, TPR repeat protein 21A (Stress-inducible protein 2)	TTC21A STI2			+									1
Q86XI8	ZSWM9_HUMAN	Uncharacterized protein ZSWIM9	ZSWIM9 C19orf68			+									1
Q96P50	ACAP3_HUMAN	Arf-GAP with coiled-coil, ANK repeat and PH domain-containing protein 3 (Centaurin-beta-5, Cnt-b5)	ACAP3 CENTB5 KIAA1716			+									1
Q96KN7	RPGR1_HUMAN	X-linked retinitis pigmentosa GTPase regulator-interacting protein 1, RPGR-interacting protein 1	RPGRIP1			+									1
Q8TCY9	URGCP_HUMAN	Up-regulator of cell proliferation (HBV X protein up-regulated gene 4 protein) (HBxAg up-regulated gene 4 protein)	URGCP KIAA1507 URG4			+									1
O43741	AAKB2_HUMAN	5'-AMP-activated protein kinase subunit beta-2, AMPK subunit beta-2	PRKAB2			+									1
O14497	ARI1A_HUMAN	AT-rich interactive domain-containing protein 1A, ARID domain-containing protein 1A (B120) (BRG1-associated factor 250, BAF250) (BRG1-associated factor 250a, BAF250A) (Osa homolog 1, hOSA1) (SWI-like protein) (SWI/SNF complex protein p270) (SWI/SNF-related, matrix-associated, actin-dependent regulator of chromatin subfamily F member 1) (hELD)	ARID1A BAF250 BAF250A C1orf4 OSA1 SMARCF1			+									1
P11388	TOP2A_HUMAN	DNA topoisomerase 2-alpha, EC 5.6.2.2 (DNA topoisomerase II, alpha isozyme)	TOP2A TOP2			+									1
Q96DC9	OTUB2_HUMAN	Ubiquitin thioesterase OTUB2, EC 3.4.19.12 (Deubiquitinating enzyme OTUB2) (OTU domain-containing ubiquitin aldehyde-binding protein 2) (Otubain-2) (Ubiquitin-specific-processing protease OTUB2)	OTUB2 C14orf137 OTB2 OTU2			+									1
Q5EBN2	TRI61_HUMAN	Putative tripartite motif-containing protein 61 (RING finger protein 35)	TRIM61 RNF35			+									1
Q8N859	ZN713_HUMAN	Zinc finger protein 713	ZNF713			+									1
P20248	CCNA2_HUMAN	Cyclin-A2, Cyclin-A (Cyclin A)	CCNA2 CCN1 CCNA			+									1
Q13136	LIPA1_HUMAN	Liprin-alpha-1 (LAR-interacting protein 1, LIP-1) (Protein tyrosine phosphatase receptor type f polypeptide-interacting protein alpha-1, PTPRF-interacting protein alpha-1)	PPFIA1 LIP1			+									1
Q9UHB7	AFF4_HUMAN	AF4/FMR2 family member 4 (ALL1-fused gene from chromosome 5q31 protein, Protein AF-5q31) (Major CDK9 elongation factor-associated protein)	AFF4 AF5Q31 MCEF HSPC092			+									1
Q7Z5J4	RAI1_HUMAN	Retinoic acid-induced protein 1	RAI1 KIAA1820			+									1
Q68DE3	USF3_HUMAN	Basic helix-loop-helix domain-containing protein USF3 (Upstream transcription factor 3)	USF3 KIAA2018			+									1
Q96NL0	RUN3B_HUMAN	RUN domain-containing protein 3B (Rap2-binding protein 9) (Rap2-interacting protein 9, RPIP-9)	RUNDC3B RPIB9 RPIP9			+									1
Q6P1J9	CDC73_HUMAN	Parafibromin (Cell division cycle protein 73 homolog) (Hyperparathyroidism 2 protein)	CDC73 C1orf28 HRPT2			+									1
P05787	K2C8_HUMAN	Keratin, type II cytoskeletal 8 (Cytokeratin-8) (CK-8) (Keratin-8) (K8) (Type-II keratin Kb8)	KRT8 CYK8	Keratin
Q04695	K1C17_HUMAN	Keratin, type I cytoskeletal 17 (39.1) (Cytokeratin-17) (CK-17) (Keratin-17) (K17)	KRT17	Keratin
P05783	K1C18_HUMAN	Keratin, type I cytoskeletal 18 (Cell proliferation-inducing gene 46 protein) (Cytokeratin-18) (CK-18) (Keratin-18) (K18)	KRT18 CYK18 PIG46	Keratin
P08729	K2C7_HUMAN	Keratin, type II cytoskeletal 7 (Cytokeratin-7) (CK-7) (Keratin-7) (K7) (Sarcolectin) (Type-II keratin Kb7)	KRT7 SCL	Keratin
P04264	K2C1_HUMAN	Keratin, type II cytoskeletal 1 (67 kDa cytokeratin) (Cytokeratin-1) (CK-1) (Hair alpha protein) (Keratin-1) (K1) (Type-II keratin Kb1)	KRT1 KRTA	Keratin
P35527	K1C9_HUMAN	Keratin, type I cytoskeletal 9 (Cytokeratin-9) (CK-9) (Keratin-9) (K9)	KRT9	Keratin
P13645	K1C10_HUMAN	Keratin, type I cytoskeletal 10 (Cytokeratin-10) (CK-10) (Keratin-10) (K10)	KRT10 KPP	Keratin
P02533	K1C14_HUMAN	Keratin, type I cytoskeletal 14 (Cytokeratin-14) (CK-14) (Keratin-14) (K14)	KRT14	Keratin
P08727	K1C19_HUMAN	Keratin, type I cytoskeletal 19 (Cytokeratin-19) (CK-19) (Keratin-19) (K19)	KRT19	Keratin
P35908	K22E_HUMAN	Keratin, type II cytoskeletal 2 epidermal (Cytokeratin-2e) (CK-2e) (Epithelial keratin-2e) (Keratin-2 epidermis) (Keratin-2e) (K2e) (Type-II keratin Kb2)	KRT2 KRT2A KRT2E	Keratin
P02538	K2C6A_HUMAN	Keratin, type II cytoskeletal 6A (Cytokeratin-6A) (CK-6A) (Cytokeratin-6D) (CK-6D) (Keratin-6A) (K6A) (Type-II keratin Kb6) (allergen Hom s 5)	KRT6A K6A KRT6D	Keratin
P08779	K1C16_HUMAN	Keratin, type I cytoskeletal 16 (Cytokeratin-16) (CK-16) (Keratin-16) (K16)	KRT16 KRT16A	Keratin
[truncated: 4 more rows]

## Sheet: Marker organelle MPs
Marker organelle membrane proteins
Organelle	Protein ID	Gene name	PSMs	Coverage	PEP Score	Unique peptides
COPI and COPIIvesicle	Q9BVK6	TMED9	37	35	54.831	9
	P49755	TMED10	33	35	59.11	7
	Q9Y3B3	TMED7	30	42	59.88	8
	Q15363	TMED2	24	31	42.305	6
	Q7Z7H5	TMED4	23	39	41.25	6
	Q9Y3A6	TMED5	9	17	13.339	4
	Q13445	TMED1	7	17	12.229	3
	Q9Y3Q3	TMED3	2	9	5.592	1
	O15400 (SNARE complex)	STX7	15	30	28.393	6
	Q13190 (SNARE complex)	STX5	6	15	13.793	5
	Q86Y82 (SNARE complex)	STX12	6	15	11.11	3
	O75396 (SNARE complex)	SEC22B	64	68	103.41	12
	Q15836 (SNARE complex)	VAMP3	17	52	38.021	2
	P63027 (SNARE complex)	VAMP2	12	34	28.598	1
	Q9BV40 (SNARE complex)	VAMP8	8	32	10.807	3
	P51809 (SNARE complex)	VAMP7	3	9	4.604	2
	O00161 (SNARE complex)	SNAP23	11	27	25.63	4
	O95249 (SNARE complex)	GOSR1	5	11	9.566	2
	Q9P0L0	VAPA	65	51	82.073	12
	O95292	VAPB	41	44	50.412	9
	O15260	Sulf4	32	28	64.087	6
	O15258	Rer1	10	24	24.492	3
	O95070	YIF1A	9	20	18.855	4
	Q5BJH7	YIF1B	6	12	19.501	3
	Q969M3	YIPF5	6	8	8.77	2
	Q9Y678	COPG1	40	24	79.815	14
	P53621	COPA	31	16	67.225	14
	P53618	COPB1	21	11	39.305	8
	O14579	COPE	13	32	44.337	5
MAM	Protein ID	Gene name	PSMs	Coverage	PEP Score	Unique peptides
	P21796	VDAC1	316	79	203	16
	P45880	VDAC2	148	60	108	12
	P11021	GRP78	251	65	321	35
	Q14573	IP3R 3	97	20	183	31
	O95140	MFN2	17	13	37	7
	O95292	VAPB	41	44	50	9
	Q96TC7	PTPIP51	37	37	56	14
	P51572	Bap31	49	39	41	12
	Q9Y3D6	Fis-1	4	19	12	2
	P57105	SYNJ2BP	23	46	34	6
	O60488	FACL4	12	7	24	2
	Q9Y512	SAMM50	69	48	127	21
	Q16891	MIC60	168	57	270	39
ERGIC	Protein ID	Gene name	PSMs	Coverage	PEP Score	Unique peptides
	P49257	LMAN1	87	45	141.245	18
	Q969X5	ERGIC1	40	43	69.331	9
	Q9Y282	ERGIC3	23	23	44.416	9
	Q96RQ1	ERGIC2	6	7	16.263	2
Plasma membrane	Protein ID	Gene name	PSMs	Coverage	PEP Score	Unique peptides
	P48960	ADGRE5	54	23	107.507	13
	P00533	EGFR	22	12	58.92	9
	P16070	CD44	45	12	68.028	9
	Q03135	CAV1	21	48	40.107	7
	P05023	ATP1A1	134	47	237.615	40
	P11717	IGF2R	134	27	260.853	46
	P19022	CDH2	28	23	78.18	11
Endoplasmic reticulum membrane	Protein ID	Gene name	PSMs	Coverage	PEP Score	Unique peptides
	P27824	CANX	186	59	242.105	33
	Q8N766	EMC1	56	30	101.504	21
	Q9P0I2	EMC3	12	31	28.067	5
	Q5J8M3	EMC4	11	35	17.502	4
	Q15006	EMC2	5	12	16.758	3
	Q9NPA0	EMC7	11	26	16.391	6
	Q8N4V1	EMC5	8	25	11.33	2
	O43402	EMC8	8	17	10.688	3
	Q9BV81	EMC6	1	9	4.103	1
	Q5UCC4	EMC10	1	6	3.445	1
	Q9NQC3	RTN4	41	17	66.606	10
	O95197	RTN3	22	8	33.966	5
Golgi membrane	Protein ID	Gene name	PSMs	Coverage	PEP Score	Unique peptides
	Q8NBJ4	GOLM1	3	3	4.306	1
	Q6P4E1	GOLM2	17	14	30.505	7
	O00461	GOLIM4	19	15	44.707	8
	Q14789	GOLGB1	107	17	204.307	43
	Q08379	GOLGA2	5	3	14.425	3
	Q9Y3E0	GOLTB1	5	17	9.75	2
Mitochondrial membrane	Protein ID	Gene name	PSMs	Coverage	PEP Score	Unique peptides
	P21796	VDAC1	316	79	203.204	16
	P13073	COX IV	51	48	60.461	9
	P00403	COXII	31	31	56.945	6
	P00395	COXI	15	14	35.651	4
	P10606	COX5B	30	61	36.076	7
	P14854	COX6B	24	57	39.49	4
	P09669	COX6C	21	51	24.65	7
	O94826	TOMM70	73	52	144.073	23
	O96008	TOMM40	62	55	102.939	11
	Q9NS69	TOMM22	50	77	94.92	7
	Q8N4H5	TOMM5	13	49	10.296	5
Nuclear membrane	Protein ID	Gene name	PSMs	Coverage	PEP Score	Unique peptides
	Q9UH99	SUN2	27	24	70.254	10
	O94901	SUN1	26	20	55.58	10
	O75694	NUP155	75	28	161.822	27
	Q8TEM1	NUP210	54	15	112.703	23
	Q92621	NUP205	52	16	124.413	24
	Q8N1F7	NUP93	50	33	91.884	19
	Q8WUM0	NUP133	31	17	69.371	13
	P57740	NUP107	27	18	58.116	12
	P52948	NUP98	22	8	39.696	11
	Q9BW27	NUP85	15	14	40.042	6
	P37198	NUP62	14	21	38.974	7
Lysosome membrane	Protein ID	Gene name	PSMs	Coverage	PEP Score	Unique peptides
	P11279	LAMP1	26	24	37.484	8
	P13473	LAMP2	15	9	12.975	4
