# Supplementary material for: Metal organic layers enabled cell surface engineering coupling biomembrane fusion for dynamic membrane proteome profiling
Source: Royal Society of Chemistry journal article supplement (doi:10.1039/d3sc03725h), 2023-01-01
Supplement: d3sc03725h3.xlsx [file d3sc03725h3.xlsx]

## Sheet: Membrane N-phosphoproteome
Membrane N-phosphoproteome Profiling
Uniprot Acession	Gene names	Protein names	Positions within proteins	Amino acid	Peptides	Localization prob	Score diff	Score	Organelle membrane localization
									Plasma membrane	Mitochondrial membrane	Nuclear membrane	Golgi membrane	Endoplasmic reticulum membrane	Vesicle associated membrane	Others
O00264	PGRMC1 HPR6.6 PGRMC	Membrane-associated progesterone receptor component 1 (mPR) (Dap1) (IZA)	187	K	EGEEPTVYSDEEEPKDESAR	1	173.467	253.34	+	+			+
O00461	GOLIM4 GIMPC GOLPH4 GPP130	Golgi integral membrane protein 4 (Golgi integral membrane protein, cis) (GIMPc) (Golgi phosphoprotein 4) (Golgi-localized phosphoprotein of 130 kDa) (Golgi phosphoprotein of 130 kDa)	651	K	ELEHNAEETYGENDENTDDKNNDGEEQEVR	0.999959	45.0278	94.149				+		+
O14967	CLGN	Calmegin	559	K	EEESEPEEKSEEEIEIIEGQEESNQSNK	1	61.3547	83.225					+
O14967	CLGN	Calmegin	586	K	SGSEDEMKEADESTGSGDGPIK	1	74.5608	75.764					+
O15173	PGRMC2 DG6 PMBP	Membrane-associated progesterone receptor component 2 (Progesterone membrane-binding protein) (Steroid receptor protein DG6)	202	K	LLKPGEEPSEYTDEEDTK	0.99867	28.7544	176.17			+
O43934	MFSD11 ET	UNC93-like protein MFSD11 (Major facilitator superfamily domain-containing protein 11) (Protein ET)	192	K	KPDSENVLGEDESSDDQDMEVNESAQNNLTK	0.992921	21.4692	79.181							+
O60763	USO1 VDP	General vesicular transport factor p115 (Protein USO1 homolog) (Transcytosis-associated protein) (TAP) (Vesicle-docking protein)	957	K	DLGHPVEEEDELESGDQEDEDDESEDPGKDLDHI	0.821261	6.76227	61.586				+		+
O95674	CDS2	Phosphatidate cytidylyltransferase 2 (EC 2.7.7.41) (CDP-DAG synthase 2) (CDP-DG synthase 2) (CDP-diacylglycerol synthase 2) (CDS 2) (CDP-diglyceride pyrophosphorylase 2) (CDP-diglyceride synthase 2) (CTP:phosphatidate cytidylyltransferase 2)	19	K	VAHEPVAPPEDKESESEAK	0.99984	37.953	123.92		+			+
P05387	RPLP2 D11S2243E RPP2	60S acidic ribosomal protein P2 (Large ribosomal subunit protein P2) (Renal carcinoma antigen NY-REN-44)	99	K	KEESEESDDDMGFGLFD	1	94.3394	94.339							+
P16671	CD36 GP3B GP4	Platelet glycoprotein 4 (Fatty acid translocase) (FAT) (Glycoprotein IIIb) (GPIIIB) (Leukocyte differentiation antigen CD36) (PAS IV) (PAS-4) (Platelet collagen receptor) (Platelet glycoprotein IV) (GPIV) (Thrombospondin receptor) (CD antigen CD36)	398	K	PSEKIQVLK	0.999999	59.0567	93.143	+					+
P19022	CDH2 CDHN NCAD	Cadherin-2 (CDw325) (Neural cadherin) (N-cadherin) (CD antigen CD325)	802	K	YDEEGGGEEDQDYDLSQLQQPDTVEPDAIKPVGIR	1	71.5435	91.217	+
P21549	AGXT AGT1 SPAT	Alanine--glyoxylate aminotransferase (AGT) (EC 2.6.1.44) (Serine--pyruvate aminotransferase) (SPT) (EC 2.6.1.51)	5	K	MASHKLLVTPPK	0.878077	8.76445	82.749							+
P27824	CANX	Calnexin (IP90) (Major histocompatibility complex class I antigen-binding protein p88) (p90)	553	K	QKSDAEEDGGTVSQEEEDR	1	76.0513	201.9			+		+
P35579	MYH9	Myosin-9 (Cellular myosin heavy chain, type A) (Myosin heavy chain 9) (Myosin heavy chain, non-muscle IIa) (Non-muscle myosin heavy chain A) (NMMHC-A) (Non-muscle myosin heavy chain IIa) (NMMHC II-a) (NMMHC-IIA)	1937	K	KGAGDGSDEEVDGK	0.999984	47.8326	193.45	+
P43243	MATR3 KIAA0723	Matrin-3	770	K	DTSENADGQSDENKDDYTIPDEYR	1	87.9707	97.819			+
P54105	CLNS1A CLCI ICLN	Methylosome subunit pICln (Chloride channel, nucleotide sensitive 1A) (Chloride conductance regulatory protein ICln) (I(Cln)) (Chloride ion current inducer protein) (ClCI) (Reticulocyte pICln)	91	K	FEEESKEPVADEEEEDSDDDVEPITEFR	1	63.7185	158.98	+
P63165	SUMO1 SMT3C SMT3H3 UBL1 OK/SW-cl.43	Small ubiquitin-related modifier 1 (SUMO-1) (GAP-modifying protein 1) (GMP1) (SMT3 homolog 3) (Sentrin) (Ubiquitin-homology domain protein PIC1) (Ubiquitin-like protein SMT3C) (Smt3C) (Ubiquitin-like protein UBL1)	7	K	SDQEAKPSTEDLGDK	0.923926	10.844	153.41	+		+
Q00839	HNRNPU C1orf199 HNRPU SAFA U21.1	Heterogeneous nuclear ribonucleoprotein U (hnRNP U) (GRIP120) (Nuclear p120 ribonucleoprotein) (Scaffold-attachment factor A) (SAF-A) (p120) (pp120)	270	K	AKSPQPPVEEEDEHFDDTVVCLDTYNCDLHFK	0.87992	8.65428	75.156	+
Q12893	TMEM115 PL6 LUCA11.2	Transmembrane protein 115 (Placental protein 6) (Protein PL6)	326	K	VDSPLPSDKAPTPPGK	1	54.4573	127.07				+
Q12906	ILF3 DRBF MPHOSPH4 NF90	Interleukin enhancer-binding factor 3 (Double-stranded RNA-binding protein 76) (DRBP76) (M-phase phosphoprotein 4) (MPP4) (Nuclear factor associated with dsRNA) (NFAR) (Nuclear factor of activated T-cells 90 kDa) (NF-AT-90) (Translational control protein 80) (TCP80)	489	K	GEDSAEETEAKPAVVAPAPVVEAVSTPSAAFPSDATAEQGPILTK	0.999888	39.4951	63.317							+
Q14160	SCRIB CRIB1 KIAA0147 LAP4 SCRB1 VARTUL	Protein scribble homolog (Scribble) (hScrib) (Protein LAP4)	694	K	AEEEEASTEEEDKEGAVVSAPSVK	1	47.0057	74.561	+
Q15019	SEPTIN2 DIFF6 KIAA0158 NEDD5 SEPT2	Septin-2 (Neural precursor cell expressed developmentally down-regulated protein 5) (NEDD-5)	225	K	IYHLPDAESDEDEDFKEQTR	0.99999	50.0713	135.14	+
Q15084	PDIA6 ERP5 P5 TXNDC7	Protein disulfide-isomerase A6 (EC 5.3.4.1) (Endoplasmic reticulum protein 5) (ER protein 5) (ERp5) (Protein disulfide isomerase P5) (Thioredoxin domain-containing protein 7)	437	K	DGELPVEDDIDLSDVELDDLGKDEL	1	103.418	103.42	+				+
Q1KMD3	HNRNPUL2 HNRPUL2	Heterogeneous nuclear ribonucleoprotein U-like protein 2 (Scaffold-attachment factor A2) (SAF-A2)	237	K	SKSPLPPEEEAKDEEEDQTLVNLDTYTSDLHFQVSK	0.918717	10.5325	113.68							+
Q2NKX8	ERCC6L PICH	DNA excision repair protein ERCC-6-like (EC 3.6.4.12) (ATP-dependent helicase ERCC6-like) (PLK1-interacting checkpoint helicase) (Tumor antigen BJ-HCC-15)	996	K	AGFVHSKTCLSWEFSEK	0.999999	59.6329	96.229							+
Q5JRA6	MIA3 KIAA0268 TANGO UNQ6077/PRO20088	Transport and Golgi organization protein 1 homolog (TANGO1) (C219-reactive peptide) (D320) (Melanoma inhibitory activity protein 3)	412	K	DTMDLESSSSEEEKEDDDDALVPDSK	0.982446	17.4794	99.064					+
Q70E73	RAPH1 ALS2CR18 ALS2CR9 KIAA1681 LPD PREL2 RMO1	Ras-associated and pleckstrin homology domains-containing protein 1 (RAPH1) (Amyotrophic lateral sclerosis 2 chromosomal region candidate gene 18 protein) (Amyotrophic lateral sclerosis 2 chromosomal region candidate gene 9 protein) (Lamellipodin) (Proline-rich EVH1 ligand 2) (PREL-2) (Protein RMO1)	19	K	MEQLSDEEIDHGAEEDSDKEDQDLDK	0.924139	10.7955	55.247	+
Q86UE4	MTDH AEG1 LYRIC	Protein LYRIC (3D3/LYRIC) (Astrocyte elevated gene-1 protein) (AEG-1) (Lysine-rich CEACAM1 co-isolated protein) (Metadherin) (Metastasis adhesion protein)	424	K	SQEPIPDDQKVSDDDKEK	0.995126	23.8343	101.3	+		+		+
Q86V48	LUZP1	Leucine zipper protein 1	656	K	EKPDSDDDLDIASLVTAK	0.999996	54.4811	109.42							+
Q8IVT5	KSR1 KSR	Kinase suppressor of Ras 1 (EC 2.7.11.1)	568	K	ADVLEAHEAEAEEPEAGKSEAEDDEDEVDDLPSSR	0.996586	27.012	52.722					+
Q8N8A6	DDX51	ATP-dependent RNA helicase DDX51 (EC 3.6.4.13) (DEAD box protein 51)	93	K	KADGEDAGAESNEEAPGEPSAGSSEEAPGEPSAGSSEEAPGER	0.999735	35.7593	51.101							+
Q8NF91	SYNE1 C6orf98 KIAA0796 KIAA1262 KIAA1756 MYNE1	Nesprin-1 (Enaptin) (KASH domain-containing protein 1) (KASH1) (Myocyte nuclear envelope protein 1) (Myne-1) (Nuclear envelope spectrin repeat protein 1) (Synaptic nuclear envelope protein 1) (Syne-1)	8314	K	ALPSEDEEGQDDKDFYLR	1	145.35	164.63			+
Q8TDJ6	DMXL2 KIAA0856	DmX-like protein 2 (Rabconnectin-3)	697	K	LSRLMDPVKHIK	0.999971	45.3127	88.177						+
Q8TEQ6	GEMIN5	Gem-associated protein 5 (Gemin5)	767	K	LESIDGNEEESMKENSGPVENGVSDQEGEEQAR	0.999925	41.2675	58.345							+
Q8WXH0	SYNE2 KIAA1011 NUA	Nesprin-2 (KASH domain-containing protein 2) (KASH2) (Nuclear envelope spectrin repeat protein 2) (Nucleus and actin connecting element protein) (Protein NUANCE) (Synaptic nuclear envelope protein 2) (Syne-2)	6358	K	LTSCTPGLEDEKEASENETDMEDPR	0.999997	54.8385	68.676			+
Q93008	USP9X DFFRX FAM USP9	Probable ubiquitin carboxyl-terminal hydrolase FAF-X (EC 3.4.19.12) (Deubiquitinating enzyme FAF-X) (Fat facets in mammals) (hFAM) (Fat facets protein-related, X-linked) (Ubiquitin thioesterase FAF-X) (Ubiquitin-specific protease 9, X chromosome) (Ubiquitin-specific-processing protease FAF-X)	1604	K	NGILAIEGTGSDVDDDMSGDEKQDNESNVDPR	0.999933	41.7501	68.934							+
Q96GR2	ACSBG1 BGM KIAA0631 LPD	Long-chain-fatty-acid--CoA ligase ACSBG1 (EC 6.2.1.3) (Acyl-CoA synthetase bubblegum family member 1) (hBG1) (hsBG) (hsBGM) (Lipidosin)	54	K	QPLSKESLNHALELSVPEK	1	78.6947	108.68	+
Q96TC7	RMDN3 FAM82A2 FAM82C PTPIP51 hucep-10 UNQ3122/PRO10274	Regulator of microtubule dynamics protein 3 (RMD-3) (hRMD-3) (Cerebral protein 10) (Protein FAM82A2) (Protein FAM82C) (Protein tyrosine phosphatase-interacting protein 51) (TCPTP-interacting protein 51)	210	K	KDSLDLEEEAASGASSALEAGGSSGLEDVLPLLQQADELHR	1	121.115	122.14		+
Q9BZA7	PCDH11X KIAA1326 PCDH11 PCDHX	Protocadherin-11 X-linked (Protocadherin-11) (Protocadherin on the X chromosome) (PCDH-X) (Protocadherin-S)	868	K	QNSEWATPNPENRQMIMMKK	1	85.9731	85.973	+
Q9H3N1	TMX1 TMX TXNDC TXNDC1 PSEC0085 UNQ235/PRO268	Thioredoxin-related transmembrane protein 1 (Thioredoxin domain-containing protein 1) (Transmembrane Trx-related protein)	234	K	KVEEEQEADEEDVSEEEAESK	0.935793	11.636	127.91					+
Q9NU22	MDN1 KIAA0301	Midasin (Dynein-related AAA-ATPase MDN1) (MIDAS-containing protein)	4892	K	VPEPEALDLPDDLNLDSEDKNGGEDTDNEEGEEENPLEIK	0.814826	6.43486	62.799							+
Q9UHR4	BAIAP2L1 IRTKS	Brain-specific angiogenesis inhibitor 1-associated protein 2-like protein 1 (BAI1-associated protein 2-like protein 1) (Insulin receptor tyrosine kinase substrate)	106	K	EIIHELEKKIELDVK	0.999937	42.0142	115.91	+
Q9UHR4	BAIAP2L1 IRTKS	Brain-specific angiogenesis inhibitor 1-associated protein 2-like protein 1 (BAI1-associated protein 2-like protein 1) (Insulin receptor tyrosine kinase substrate)	107	K	EIIHELEKKIELDVK	0.999795	36.8791	115.91	+
Q9Y2X3	NOP58 NOL5 NOP5 HSPC120	Nucleolar protein 58 (Nucleolar protein 5)	517	K	EEPLSEEEPCTSTAIASPEKK	1	47.1748	148.52							+
Q9Y2X3	NOP58 NOL5 NOP5 HSPC120	Nucleolar protein 58 (Nucleolar protein 5)	497	K	HIKEEPLSEEEPCTSTAIASPEKK	0.996977	26.5968	78.976							+
O00327	BMAL1 ARNTL BHLHE5 MOP3 PASD3	Basic helix-loop-helix ARNT-like protein 1 (Aryl hydrocarbon receptor nuclear translocator-like protein 1) (Basic-helix-loop-helix-PAS protein MOP3) (Brain and muscle ARNT-like 1) (Class E basic helix-loop-helix protein 5) (bHLHe5) (Member of PAS protein 3) (PAS domain-containing protein 3) (bHLH-PAS protein JAP3)	77	H	IKNAREAHSQIEK	0.810678	6.56249	104.2							+
O00461	GOLIM4 GIMPC GOLPH4 GPP130	Golgi integral membrane protein 4 (Golgi integral membrane protein, cis) (GIMPc) (Golgi phosphoprotein 4) (Golgi-localized phosphoprotein of 130 kDa) (Golgi phosphoprotein of 130 kDa)	482	H	QQAHYDAMDNDIVQGAEDQGIQGEEGAYER	0.993331	21.7302	55.406				+		+
O00592	PODXL PCLP PCLP1	Podocalyxin (GCTM-2 antigen) (Gp200) (Podocalyxin-like protein 1) (PC) (PCLP-1)	508	H	LTEELQTVENGYHDNPTLEVMETSSEMQEK	1	43.2396	58.08	+
O15379	HDAC3	Histone deacetylase 3 (HD3) (EC 3.5.1.98) (Protein deacetylase HDAC3) (EC 3.5.1.-) (Protein deacylase HDAC3) (EC 3.5.1.-) (RPD3-2) (SMAP45)	418	H	GPEENYSRPEAPNEFYDGDHDNDKESDVEI	0.806778	6.21334	63.901	+
O60763	USO1 VDP	General vesicular transport factor p115 (Protein USO1 homolog) (Transcytosis-associated protein) (TAP) (Vesicle-docking protein)	932	H	DLGHPVEEEDELESGDQEDEDDESEDPGKDLDHI	0.998961	30.0228	76.835				+		+
P0DJ93	SMIM13 C6orf228	Small integral membrane protein 13	55	H	ELVGDTGSQEGDHEPSGSETEEDTSSSPHR	0.999995	55.2585	69.444							+
P0DJ93	SMIM13 C6orf228	Small integral membrane protein 13	71	H	ELVGDTGSQEGDHEPSGSETEEDTSSSPHR	0.926508	11.0019	59.628							+
P11277	SPTB SPTB1	Spectrin beta chain, erythrocytic (Beta-I spectrin)	1388	H	LQTHADLNK	0.999999	59.275	120.87	+
P20020	ATP2B1 PMCA1	Plasma membrane calcium-transporting ATPase 1 (EC 7.2.2.10) (Plasma membrane calcium ATPase isoform 1) (PMCA1) (Plasma membrane calcium pump isoform 1)	1158	H	IEDSEPHIPLIDDTDAEDDAPTK	1	74.8954	166.59	+					+
P25205	MCM3	DNA replication licensing factor MCM3 (EC 3.6.4.12) (DNA polymerase alpha holoenzyme-associated protein P1) (P1-MCM3) (RLF subunit beta) (p102)	721	H	DGDSYDPYDFSDTEEEMPQVHTPK	1	55.1582	74.13							+
P49792	RANBP2 NUP358	E3 SUMO-protein ligase RanBP2 (EC 2.3.2.-) (358 kDa nucleoporin) (Nuclear pore complex protein Nup358) (Nucleoporin Nup358) (Ran-binding protein 2) (RanBP2) (p270)	1162	H	NHETDGGSAHGDDDDDGPHFEPVVPLPDK	0.992962	22.9169	72.946			+
P49792	RANBP2 NUP358	E3 SUMO-protein ligase RanBP2 (EC 2.3.2.-) (358 kDa nucleoporin) (Nuclear pore complex protein Nup358) (Nucleoporin Nup358) (Ran-binding protein 2) (RanBP2) (p270)	2906	H	VGEDEDGSDEEVVHNEDIHFEPIVSLPEVEVK	0.837619	10.0308	71.556			+
P51636	CAV2	Caveolin-2	21	H	ADVQLFMDDDSYSHHSGLEYADPEK	1	57.4962	84.948	+			+
P51636	CAV2	Caveolin-2	22	H	ADVQLFMDDDSYSHHSGLEYADPEK	1	57.4962	84.948	+			+
P51798	CLCN7	H(+)/Cl(-) exchange transporter 7 (Chloride channel 7 alpha subunit) (Chloride channel protein 7) (ClC-7)	58	H	VGHMSSVELDDELLDPDMDPPHPFPK	1	69.0131	112.88						+
Q07157	TJP1 ZO1	Tight junction protein ZO-1 (Tight junction protein 1) (Zona occludens protein 1) (Zonula occludens protein 1)	279	H	ATLLNVPDLSDSIHSANASER	0.997039	25.2722	72.058	+
Q14008	CKAP5 KIAA0097	Cytoskeleton-associated protein 5 (Colonic and hepatic tumor overexpressed gene protein) (Ch-TOG)	827	H	HSTSGTDEGEDGDEPDDGSNDVVDLLPR	1	69.1288	71.503	+
Q15019	SEPTIN2 DIFF6 KIAA0158 NEDD5 SEPT2	Septin-2 (Neural precursor cell expressed developmentally down-regulated protein 5) (NEDD-5)	212	H	IYHLPDAESDEDEDFKEQTR	0.985974	18.4694	119.8	+
Q32MZ4	LRRFIP1 GCF2 TRIP	Leucine-rich repeat flightless-interacting protein 1 (LRR FLII-interacting protein 1) (GC-binding factor 2) (TAR RNA-interacting protein)	731	H	CTLPEHESPSQDISDACEAESTER	1	64.3569	97.059	+
Q5JTV8	TOR1AIP1 LAP1	Torsin-1A-interacting protein 1 (Lamin-associated protein 1B) (LAP1B)	155	H	GLRDSHSSEEDEASSQTDLSQTISK	1	49.6229	166.21			+
Q5JTV8	TOR1AIP1 LAP1	Torsin-1A-interacting protein 1 (Lamin-associated protein 1B) (LAP1B)	229	H	VNFSEEGETEEDDQDSSHSSVTTVK	1	81.4414	81.441			+
Q86VR2	RETREG3 FAM134C	Reticulophagy regulator 3	319	H	GQTPLTEGSEDLDGHSDPEESFAR	0.999895	39.7721	84.166					+
Q8IVF2	AHNAK2 C14orf78 KIAA2019	Protein AHNAK2	37	H	QLQPGEPGAETEDDHSVTEGPADEGIRPR	0.999968	46.1324	75.177	+
Q8N3D4	EHBP1L1	EH domain-binding protein 1-like protein 1	197	H	PSDVGNLDDFAESDEDEAHGPGAPEAR	0.999958	43.7499	68.303							+
Q8NHH9	ATL2 ARL6IP2	Atlastin-2 (EC 3.6.5.-) (ADP-ribosylation factor-like protein 6-interacting protein 2) (ARL-6-interacting protein 2) (Aip-2)	32	H	TSDPSAAVNHVSSTTSLGENYEDDDLVNSDEVMK	0.955444	13.313	142.01					+
Q92934	BAD BBC6 BCL2L8	Bcl2-associated agonist of cell death (BAD) (Bcl-2-binding component 6) (Bcl-2-like protein 8) (Bcl2-L-8) (Bcl-xL/Bcl-2-associated death promoter) (Bcl2 antagonist of cell death)	73	H	HSSYPAGTEDDEGMGEEPSPFR	1	63.2562	66.448		+
Q96GR2	ACSBG1 BGM KIAA0631 LPD	Long-chain-fatty-acid--CoA ligase ACSBG1 (EC 6.2.1.3) (Acyl-CoA synthetase bubblegum family member 1) (hBG1) (hsBG) (hsBGM) (Lipidosin)	59	H	QPLSKESLNHALELSVPEK	1	83.3287	108.68	+
Q9GZP1	NRSN2 C20orf98	Neurensin-2	158	H	AEPLDPEADSHVEVFGDEPEQQLSPIFR	1	87.5982	94.087	+
Q9H0S4	DDX47	Probable ATP-dependent RNA helicase DDX47 (EC 3.6.4.13) (DEAD box protein 47)	7	H	AAPEEHDSPTEASQPIVEEEETK	0.998873	29.4765	66.383							+
Q9H307	PNN DRS MEMA	Pinin (140 kDa nuclear and cell adhesion-related phosphoprotein) (Desmosome-associated protein) (Domain-rich serine protein) (DRS protein) (DRSP) (Melanoma metastasis clone A protein) (Nuclear protein SDK3) (SR-like protein)	346	H	EIAIVHSDAEKEQEEEEQK	0.765814	5.36542	92.427	+
Q9NR30	DDX21	Nucleolar RNA helicase 2 (EC 3.6.4.13) (DEAD box protein 21) (Gu-alpha) (Nucleolar RNA helicase Gu) (Nucleolar RNA helicase II) (RH II/Gu)	156	H	NGFPHPEPDCNPSEAASEESNSEIEQEIPVEQK	1	40.4101	59.793							+
Q9UHR4	BAIAP2L1 IRTKS	Brain-specific angiogenesis inhibitor 1-associated protein 2-like protein 1 (BAI1-associated protein 2-like protein 1) (Insulin receptor tyrosine kinase substrate)	102	H	EIIHELEKKIELDVK	0.999974	45.7806	115.91	+
Q9Y2X7	GIT1	ARF GTPase-activating protein GIT1 (ARF GAP GIT1) (Cool-associated and tyrosine-phosphorylated protein 1) (CAT-1) (CAT1) (G protein-coupled receptor kinase-interactor 1) (GRK-interacting protein 1) (p95-APP1)	381	H	SQSDLDDQHDYDSVASDEDTDQEPLR	1	57.0683	107.07							+
Q9Y6M7	SLC4A7 BT NBC2 NBC2B NBC3 NBCn1 SBC2 SLC4A6	Sodium bicarbonate cotransporter 3 (Electroneutral Na/HCO(3) cotransporter) (Sodium bicarbonate cotransporter 2) (Sodium bicarbonate cotransporter 2b) (Bicarbonate transporter) (Solute carrier family 4 member 7)	1169	H	MLQDDDDTVHLPFEGGSLLQIPVK	0.997752	26.4716	63.606	+
O00116	AGPS AAG5	Alkyldihydroxyacetonephosphate synthase, peroxisomal (Alkyl-DHAP synthase) (EC 2.5.1.26) (Aging-associated gene 5 protein) (Alkylglycerone-phosphate synthase)	198	R	VFRAHGHCLHEIFLLREGMFER	0.886759	9.14187	53.188						+
O14976	GAK	Cyclin-G-associated kinase (EC 2.7.11.1)	220	R	ALVEEEITRNTTPMYRTPEIIDLYSNFPIGEK	0.990989	20.2671	43.291							+
O14976	GAK	Cyclin-G-associated kinase (EC 2.7.11.1)	227	R	ALVEEEITRNTTPMYRTPEIIDLYSNFPIGEK	0.967256	14.6634	43.291							+
O95239	KIF4A KIF4	Chromosome-associated kinesin KIF4A (Chromokinesin-A)	974	R	MREVCEQNQQLLR	0.999999	62.7185	63.473							+
P04003	C4BPA C4BP	C4b-binding protein alpha chain (C4bp) (Proline-rich protein) (PRP)	554	R	RLMQCLPNPEDVKMALEVYK	0.999996	52.8262	61.222	+
P04920	SLC4A2 AE2 EPB3L1 HKB3 MPB3L	Anion exchange protein 2 (AE 2) (Anion exchanger 2) (Non-erythroid band 3-like protein) (BND3L) (Solute carrier family 4 member 2)	109	R	RRPGASPTGETPTIEEGEEDEDEASEAEGAR	0.807393	6.22413	97.188	+
P07910	HNRNPC HNRPC	Heterogeneous nuclear ribonucleoproteins C1/C2 (hnRNP C1/C2)	275	R	MESEGGADDSAEEGDLLDDDDNEDRGDDQLELIKDDEK	0.999952	40.2882	110.29							+
P10276	RARA NR1B1	Retinoic acid receptor alpha (RAR-alpha) (Nuclear receptor subfamily 1 group B member 1)	367	R	RPSRPHMFPK	0.999942	42.3677	67.494	+
P10276	RARA NR1B1	Retinoic acid receptor alpha (RAR-alpha) (Nuclear receptor subfamily 1 group B member 1)	370	R	RPSRPHMFPK	0.999841	37.9429	67.494	+
P13861	PRKAR2A PKR2 PRKAR2	cAMP-dependent protein kinase type II-alpha regulatory subunit	97	R	RVSVCAETYNPDEEEEDTDPR	1	107.046	140.03	+
P19367	HK1	Hexokinase-1 (EC 2.7.1.1) (Brain form hexokinase) (Hexokinase type I) (HK I) (Hexokinase-A)	283	R	EIDRGSLNPGKQLFEK	0.999978	46.5712	83.856		+
P29590	PML MYL PP8675 RNF71 TRIM19	Protein PML (E3 SUMO-protein ligase PML) (EC 2.3.2.-) (Promyelocytic leukemia protein) (RING finger protein 71) (RING-type E3 SUMO transferase PML) (Tripartite motif-containing protein 19) (TRIM19)	7	R	MEPAPARSPR	0.984174	17.9369	67.897			+		+	+
P42167	TMPO LAP2	Lamina-associated polypeptide 2, isoforms beta/gamma (Thymopoietin, isoforms beta/gamma) (TP beta/gamma) (Thymopoietin-related peptide isoforms beta/gamma) (TPRP isoforms beta/gamma) [Cleaved into: Thymopoietin (TP) (Splenin); Thymopentin (TP5)]	182	R	QNGSNDSDRYSDNEEDSKIELK	0.999998	56.7207	93.269			+
Q01082	SPTBN1 SPTB2	Spectrin beta chain, non-erythrocytic 1 (Beta-II spectrin) (Fodrin beta chain) (Spectrin, non-erythroid beta chain 1)	2099	R	RPPSPEPSTK	0.996779	24.9062	90.601	+
Q07157	TJP1 ZO1	Tight junction protein ZO-1 (Tight junction protein 1) (Zona occludens protein 1) (Zonula occludens protein 1)	118	R	VQIPVSRPDPEPVSDNEEDSYDEEIHDPR	0.99797	27.2406	65.223	+
Q13634	CDH18 CDH14	Cadherin-18 (Cadherin-14)	50	R	NQTKHIEGETEVHHRPK	0.76613	5.2575	51.466	+
Q14160	SCRIB CRIB1 KIAA0147 LAP4 SCRB1 VARTUL	Protein scribble homolog (Scribble) (hScrib) (Protein LAP4)	1564	R	LAEAPSPAPTPSPTPVEDLGPQTSTSPGRLSPDFAEELR	1	50.6601	94.185	+
Q15154	PCM1	Pericentriolar material 1 protein (PCM-1) (hPCM-1)	1764	R	NVRSDISDQEEDEESEGCPVSINLSK	1	62.4469	75.261			+
Q1KMD3	HNRNPUL2 HNRPUL2	Heterogeneous nuclear ribonucleoprotein U-like protein 2 (Scaffold-attachment factor A2) (SAF-A2)	160	R	EEDEPEERSGDETPGSEVPGDK	0.999222	31.0887	88.755							+
Q5JTV8	TOR1AIP1 LAP1	Torsin-1A-interacting protein 1 (Lamin-associated protein 1B) (LAP1B)	152	R	GLRDSHSSEEDEASSQTDLSQTISK	1	49.6229	97.639			+
Q5T1M5	FKBP15 KIAA0674	FK506-binding protein 15 (FKBP-15) (133 kDa FK506-binding protein) (133 kDa FKBP) (FKBP-133) (WASP- and FKBP-like protein) (WAFL)	954	R	RPSQEQSASASSGQPQAPLNR	1	116.793	128.44							+
Q5TZA2	CROCC KIAA0445	Rootletin (Ciliary rootlet coiled-coil protein)	1286	R	ELQELRRQMK	1	84.4978	84.498	+
Q5TZA2	CROCC KIAA0445	Rootletin (Ciliary rootlet coiled-coil protein)	1287	R	ELQELRRQMK	1	84.4978	84.498	+
Q7LBR1	CHMP1B C18orf2	Charged multivesicular body protein 1b (CHMP1.5) (Chromatin-modifying protein 1b) (CHMP1b) (Vacuolar protein sorting-associated protein 46-2) (Vps46-2) (hVps46-2)	71	R	MSARVDAVAAR	1	75.7382	75.738	+					+
Q8N3E9	PLCD3 KIAA1964	1-phosphatidylinositol 4,5-bisphosphate phosphodiesterase delta-3 (EC 3.1.4.11) (Phosphoinositide phospholipase C-delta-3) (Phospholipase C-delta-3) (PLC-delta-3)	498	R	ALSDREEEEEDDEEEEEEVEAAAQR	1	72.219	72.864	+
Q8TAX9	GSDMB GSDML PP4052 PRO2521	Gasdermin-B (Gasdermin-like protein) [Cleaved into: Gasdermin-B, N-terminal (GSDMB-NT) (p30); Gasdermin-B, C-terminal (GSDMB-CT) (p16)]	147	R	ELPFSFRSINTRENLYLVTETLETVK	1	50.8512	50.851	+
Q8TAX9	GSDMB GSDML PP4052 PRO2521	Gasdermin-B (Gasdermin-like protein) [Cleaved into: Gasdermin-B, N-terminal (GSDMB-NT) (p30); Gasdermin-B, C-terminal (GSDMB-CT) (p16)]	152	R	ELPFSFRSINTRENLYLVTETLETVK	1	50.8512	50.851	+
Q8WVX9	FAR1 MLSTD2 UNQ2423/PRO4981	Fatty acyl-CoA reductase 1 (EC 1.2.1.84) (Male sterility domain-containing protein 2)	373	R	MTGRSPRMMK	0.998007	27.8169	60.973						+
Q92508	PIEZO1 FAM38A KIAA0233	Piezo-type mechanosensitive ion channel component 1 (Membrane protein induced by beta-amyloid treatment) (Mib) (Protein FAM38A)	160	R	ELDDDERDVDASPTAGLQEAATLAPTR	1	76.3519	82.476	+				+
Q96FS4	SIPA1 SPA1	Signal-induced proliferation-associated protein 1 (Sipa-1) (GTPase-activating protein Spa-1) (p130 SPA-1)	881	R	PSVPSADSETPLTQDRPGSPSGSEDK	0.978066	16.4926	83.602							+
Q96KC8	DNAJC1 HTJ1	DnaJ homolog subfamily C member 1 (DnaJ protein homolog MTJ1)	486	R	DFDIAEQNESSDEESLRK	1	61.2648	61.265	+		+		+
Q96KG9	SCYL1 CVAK90 GKLP NTKL TAPK TEIF TRAP HT019	N-terminal kinase-like protein (Coated vesicle-associated kinase of 90 kDa) (SCY1-like protein 1) (Telomerase regulation-associated protein) (Telomerase transcriptional element-interacting factor) (Teratoma-associated tyrosine kinase)	751	R	PSTQPRPDSWGEDNWEGLETDSR	0.999999	59.6	106.69				+	+
Q9BYT8	NLN AGTBP KIAA1226	Neurolysin, mitochondrial (EC 3.4.24.16) (Angiotensin-binding protein) (Microsomal endopeptidase) (MEP) (Mitochondrial oligopeptidase M) (Neurotensin endopeptidase)	10	R	IARCLLAVRSLR	0.999963	44.3401	59.542	+
Q9BZA7	PCDH11X KIAA1326 PCDH11 PCDHX	Protocadherin-11 X-linked (Protocadherin-11) (Protocadherin on the X chromosome) (PCDH-X) (Protocadherin-S)	862	R	QNSEWATPNPENRQMIMMKK	1	85.9731	85.973	+
Q9H2G9	BLZF1 JEM1	Golgin-45 (Basic leucine zipper nuclear factor 1) (JEM-1) (p45 basic leucine-zipper nuclear factor)	375	R	KNIGRFHPYTR	0.992267	21.6833	76.1				+
Q9NPQ8	RIC8A	Synembryn-A (Protein Ric-8A)	430	R	GLMAGGRPEGQYSEDEDTDTDEYK	1	50.7574	58.858	+
Q9NU22	MDN1 KIAA0301	Midasin (Dynein-related AAA-ATPase MDN1) (MIDAS-containing protein)	5012	R	EADEEGGENGPADQGFQPQEEEEREDSDTEEQVPEALER	0.99996	43.9394	51.868							+
Q9NZK5	ADA2 ADGF CECR1 IDGFL	Adenosine deaminase 2 (EC 3.5.4.4) (Cat eye syndrome critical region protein 1)	95	R	HLIERSQVFNILRMMPK	0.760485	5.01741	62.166							+
Q9NZK5	ADA2 ADGF CECR1 IDGFL	Adenosine deaminase 2 (EC 3.5.4.4) (Cat eye syndrome critical region protein 1)	103	R	HLIERSQVFNILRMMPK	0.999977	45.1438	62.166							+
